# Supplementary material for: Transcriptome dynamics of hippocampal neurogenesis in macaques across the lifespan and aged humans
Source: Research Square preprint supplement (doi:10.21203/rs.3.rs-1015150/v1), 2021-11-18
Supplement: Supplementary file 2 [file 524316f919580300c586c50b.xlsx]

## Sheet: Table S8
Supplementary Table8: Detailed information of Antibodies used in the study
Antibodies	SOURCE	IDENTIFIER
Mouse monoclonal anti-Ki-67 (clone B56)	BD Biosciences	Cat# 556003, RRID:AB_396287
Rabbit polyclonal anti-Pax-6	BioLegend	Cat# 901301, RRID:AB_2565003
Rabbit polyclonal anti-Doublecortin	Abcam	Cat# ab18723, RRID:AB_732011
Guinea pig polyclonal anti-DCX	Millipore	Cat# AB2253, RRID:AB_1586992
Mouse monoclonal anti-NeuN	Millipore	Cat# MAB377, RRID:AB_2298772
Rabbit polyclonal GFAP antibody	Abcam	Cat# ab7260, RRID:AB_305808
Rat Anti-BrdU Monoclonal Antibody, Unconjugated, Clone BU1 / 75 (ICR1)	Abcam	Cat# ab6326, RRID:AB_305426
Mouse monoclonal Histone H3 (phospho S10) antibody	Abcam	Cat# ab14955, RRID:AB_443110
Mouse monoclonal PCNA antibody	Novus	Cat# NB500-106, RRID:AB_2252058
Mouse Anti-Polysialic Acid-NCAM (PSA-NCAM) monoclonal antibody	Millipore	Cat# MAB5324, RRID:AB_95211
Mouse monoclonal anti- PSA-NCAM	Developmental Studies Hybridoma Bank	Cat# 5A5, RRID:AB_528392
Goat polyclonal Sox-2 (Y-17) antibody	Santa Cruz Biotechnology	Cat# sc-17320, RRID:AB_2286684
Rabbit polyclonal anti-ETNPPL	Atlas Antibodies	Cat# HPA044546, RRID:AB_10962867
Rabbit polyclonal anti-FAM107A	Atlas Antibodies	Cat# HPA055888, RRID:AB_2682957
Rabbit polyclonal anti-ALDH1A1	Atlas Antibodies	Cat# HPA002123, RRID:AB_1844722
Rabbit polyclonal anti-MFGE8	Atlas Antibodies	Cat# HPA002807, RRID:AB_1078072
Rabbit monoclonal Stathmin 1 antibody [EP1573Y]	Abcam	Cat# ab52630, RRID:AB_2197257
Rabbit STMN2 polyclonal antibody	Thermo Fisher Scientific	Cat# 720178, RRID:AB_2606219
Rabbit polyclonal Hop (FL-73) antibody	Santa Cruz Biotechnology	Cat# sc-30216, RRID:AB_2120833
MCM2 (D7G11) XP Rabbit mAb antibody	Cell Signaling Technology	Cat# 3619, RRID:AB_2142137
Mouse monoclonal anti-NEUROD1	Abcam	Cat# ab60704, RRID:AB_943491
Mouse monoclonal anti-Calretinin	Swant	Cat# 6B3, RRID:AB_10000320
Mouse monoclonal anti-Calbindin	MilliporeSigma	Cat# C9848, RRID:AB_476894
