# Supplementary material for: Transcriptome dynamics of hippocampal neurogenesis in macaques across the lifespan and aged humans
Source: Research Square preprint supplement (doi:10.21203/rs.3.rs-1015150/v1), 2021-11-18
Supplement: Supplementary file 3 [file 6821dd215b2842035fec17de.xlsx]

## Sheet: Table S2
Supplementary Table2: Differentially expressed genes among major cell type of macaque hippocampus
p_val	avg_log2FC	pct.1	pct.2	p_val_adj	cluster	gene
0	5.00913	0.79	0.07	0	Pericyte	LAMA2
1.43108e-144	4.07262	0.526	0.231	1.95743e-140	Pericyte	CEMIP
0	3.7091	0.626	0.066	0	Pericyte	EBF1
0	3.43789	0.861	0.236	0	Pericyte	RBMS3
0	3.40644	0.652	0.012	0	Pericyte	ITIH5
0	3.05993	0.662	0.068	0	Pericyte	RBPMS
0	2.9769	0.408	0.005	0	Pericyte	SLC6A20
4.32189e-133	2.94553	0.302	0.077	5.91148e-129	Pericyte	SLC38A11
0	2.88495	0.453	0.079	0	Pericyte	BMP6
0	2.86641	0.724	0.134	0	Pericyte	NID1
0	2.85949	0.648	0.081	0	Pericyte	LAMA4
3.66609e-186	2.78962	0.511	0.163	5.01448e-182	Pericyte	PTGDS
0	2.74445	0.489	0.071	0	Pericyte	IGFBP7
8.07241e-304	2.66267	0.523	0.12	1.10414e-299	Pericyte	MYO1B
3.79264e-297	2.60472	0.689	0.216	5.18757e-293	Pericyte	UTRN
6.0969e-163	2.60055	0.633	0.303	8.33933e-159	Pericyte	CALD1
0	2.54657	0.612	0.067	0	Pericyte	ARHGAP29
6.28806e-295	2.53828	0.843	0.378	8.60081e-291	Pericyte	LHFPL6
1.19348e-136	2.52258	0.387	0.122	1.63244e-132	Pericyte	KCNK2
6.66084e-249	2.49777	0.676	0.244	9.11069e-245	Pericyte	SLC6A1
7.45289e-22	2.4743	0.384	0.291	1.01941e-17	Pericyte	GRM8
0	2.46604	0.401	0.008	0	Pericyte	C7
5.75429e-156	2.43179	0.39	0.11	7.87072e-152	Pericyte	COBLL1
0	2.37504	0.63	0.139	0	Pericyte	UACA
3.80212e-217	2.33662	0.662	0.242	5.20054e-213	Pericyte	TMEM132C
0	2.329	0.456	0.017	0	Pericyte	EGFLAM
0	2.28109	0.445	0.012	0	Pericyte	DCN
2.34098e-75	2.22714	0.568	0.408	3.20199e-71	Pericyte	BICC1
0	2.22608	0.491	0.098	0	Pericyte	TGFBR3
7.10091e-84	2.18482	0.435	0.199	9.71262e-80	Pericyte	EPS8
2.90184e-216	2.17657	0.453	0.112	3.96913e-212	Pericyte	SLC7A11
7.73877e-290	2.15957	0.613	0.171	1.05851e-285	Pericyte	SYNE2
4.23198e-183	2.15246	0.574	0.216	5.7885e-179	Pericyte	TIMP3
5.13591e-95	2.14592	0.36	0.129	7.02489e-91	Pericyte	COLEC12
0	2.13233	0.426	0.035	0	Pericyte	MYOF
0	2.10207	0.405	0.067	0	Pericyte	FN1
0	2.09988	0.506	0.082	0	Pericyte	KANK2
0	2.04065	0.351	0.024	0	Pericyte	OGN
3.63454e-233	2.02675	0.419	0.095	4.97132e-229	Pericyte	ABCA9
0	2.02329	0.457	0.07	0	Pericyte	PDE5A
0	2.02067	0.317	0.038	0	Pericyte	SLC13A4
0	2.01775	0.411	0.047	0	Pericyte	CPED1
8.40204e-159	2.0051	0.804	0.558	1.14923e-154	Pericyte	KCNT2
2.12141e-168	2.00017	0.307	0.066	2.90167e-164	Pericyte	ADAMTS12
1.22598e-179	1.99238	0.519	0.171	1.6769e-175	Pericyte	ARHGAP42
2.85422e-144	1.94422	0.71	0.419	3.904e-140	Pericyte	PLCB4
2.7191e-146	1.92294	0.397	0.12	3.71919e-142	Pericyte	PROS1
0	1.91651	0.47	0.09	0	Pericyte	TNS1
1.69556e-211	1.90914	0.215	0.027	2.31918e-207	Pericyte	RGS5
1.61259e-249	1.89364	0.54	0.138	2.2057e-245	Pericyte	PTN
0	1.88457	0.345	0.037	0	Pericyte	PDGFRB
4.43618e-184	1.876	0.502	0.161	6.06781e-180	Pericyte	MAP3K20
5.11654e-162	1.86481	0.586	0.25	6.99841e-158	Pericyte	RBMS1
0	1.86373	0.429	0.076	0	Pericyte	NR2F2
2.62834e-37	1.83967	0.229	0.101	3.59505e-33	Pericyte	THSD4
0	1.82047	0.318	0.003	0	Pericyte	COL1A2
9.60549e-60	1.78048	0.447	0.262	1.31384e-55	Pericyte	FREM1
1.57694e-75	1.77193	0.478	0.266	2.15693e-71	Pericyte	ARHGAP10
8.34075e-75	1.76822	0.53	0.336	1.14085e-70	Pericyte	PHACTR2
3.65843e-126	1.76627	0.337	0.092	5.004e-122	Pericyte	APOD
0	1.76154	0.202	0.014	0	Pericyte	ABCC9
0	1.75589	0.3	0.023	0	Pericyte	CPAMD8
0	1.75496	0.303	0.02	0	Pericyte	VIM
0	1.74678	0.245	0.002	0	Pericyte	IGF2
9.22999e-193	1.72434	0.386	0.087	1.26248e-188	Pericyte	SNTB1
0	1.72005	0.407	0.054	0	Pericyte	DDR2
2.02493e-130	1.71473	0.376	0.117	2.7697e-126	Pericyte	COL12A1
3.72302e-84	1.70611	0.323	0.113	5.09235e-80	Pericyte	ADAM12
0	1.70574	0.309	0.023	0	Pericyte	ITGA1
6.52883e-65	1.6673	0.257	0.093	8.93013e-61	Pericyte	PLXDC1
1.38221e-65	1.65097	0.366	0.162	1.89059e-61	Pericyte	NHS
1.40655e-39	1.6464	0.75	0.627	1.92388e-35	Pericyte	TRPM3
7.37662e-15	1.64253	0.151	0.08	1.00897e-10	Pericyte	HTR1F
9.90418e-237	1.63917	0.428	0.093	1.35469e-232	Pericyte	SP100
4.20027e-261	1.62631	0.373	0.065	5.74513e-257	Pericyte	FBLN1
0	1.62134	0.353	0.05	0	Pericyte	MRC2
4.23515e-73	1.61395	0.48	0.277	5.79283e-69	Pericyte	FRMD6
2.26446e-147	1.59866	0.415	0.127	3.09733e-143	Pericyte	COL5A2
5.49099e-132	1.59698	0.447	0.158	7.51058e-128	Pericyte	SLC2A12
2.54263e-57	1.59095	0.202	0.065	3.47781e-53	Pericyte	ATP13A5
3.81839e-64	1.58649	0.614	0.418	5.22279e-60	Pericyte	PDE7B
1.26486e-268	1.58503	0.299	0.041	1.73007e-264	Pericyte	EPAS1
4.26927e-104	1.58445	0.397	0.154	5.8395e-100	Pericyte	PHLDB2
6.41415e-93	1.58395	0.224	0.056	8.77327e-89	Pericyte	COL4A3
9.69776e-127	1.58031	0.75	0.441	1.32646e-122	Pericyte	FBXL7
4.03997e-127	1.57879	0.447	0.157	5.52587e-123	Pericyte	EYA1
1.05223e-43	1.57177	0.226	0.091	1.43924e-39	Pericyte	CDH6
2.53533e-100	1.56606	0.558	0.305	3.46782e-96	Pericyte	PTPN13
7.79029e-115	1.55668	0.449	0.167	1.06556e-110	Pericyte	ANGPT1
8.06983e-235	1.5386	0.283	0.042	1.10379e-230	Pericyte	ALDH1A2
0	1.53706	0.273	0.014	0	Pericyte	AOX1
1.12433e-76	1.53538	0.655	0.527	1.53787e-72	Pericyte	SLC20A2
0	1.53182	0.332	0.034	0	Pericyte	SVIL
0	1.5117	0.386	0.059	0	Pericyte	TGFBR2
4.33502e-140	1.5046	0.724	0.39	5.92944e-136	Pericyte	PTPRM
1.07679e-106	1.49954	0.45	0.182	1.47283e-102	Pericyte	FGD6
2.02566e-263	1.49736	0.352	0.059	2.7707e-259	Pericyte	DOCK6
8.5512e-283	1.49395	0.387	0.064	1.16963e-278	Pericyte	YAP1
6.64337e-204	1.48613	0.201	0.025	9.0868e-200	Pericyte	NOTCH3
4.02091e-201	1.48277	0.959	0.77	5.4998e-197	Pericyte	PARD3
1.35076e-90	1.47786	0.311	0.101	1.84757e-86	Pericyte	EYA2
0	1.47657	0.251	0.011	0	Pericyte	BMP5
4.61658e-96	1.47271	0.238	0.061	6.31456e-92	Pericyte	TRPC3
0	1.4725	0.167	0.006	0	Pericyte	RERGL
2.11106e-07	1.46676	0.401	0.419	0.0028875	Pericyte	ADAMTSL3
8.90805e-126	1.45735	0.342	0.098	1.21844e-121	Pericyte	DAB2
6.70442e-60	1.45294	0.383	0.199	9.1703e-56	Pericyte	ARHGAP28
1.72183e-40	1.44664	0.516	0.386	2.35512e-36	Pericyte	ARHGAP6
6.70957e-99	1.44143	0.651	0.419	9.17736e-95	Pericyte	LPP
1.22994e-154	1.43758	0.248	0.046	1.68232e-150	Pericyte	NKD1
4.90449e-43	1.4301	0.18	0.063	6.70836e-39	Pericyte	TAGLN
5.14991e-232	1.42832	0.306	0.049	7.04405e-228	Pericyte	TRIM5
6.97059e-34	1.42648	0.589	0.58	9.53437e-30	Pericyte	PTEN
1.25316e-51	1.40779	0.363	0.192	1.71407e-47	Pericyte	SPARC
3.55863e-78	1.40164	0.383	0.158	4.86749e-74	Pericyte	FOXP2
0	1.4007	0.283	0.004	0	Pericyte	ZIC1
1.1623e-65	1.39633	0.351	0.146	1.58979e-61	Pericyte	PDE3A
7.08191e-74	1.39448	0.679	0.528	9.68664e-70	Pericyte	PID1
1.33338e-99	1.39179	0.773	0.716	1.8238e-95	Pericyte	PCCA
2.67892e-20	1.3909	0.461	0.435	3.66423e-16	Pericyte	CYTH3
2.37054e-139	1.38571	0.254	0.052	3.24242e-135	Pericyte	LAMC3
1.03346e-17	1.38543	0.33	0.251	1.41357e-13	Pericyte	SLC13A3
1.61668e-65	1.3693	0.641	0.527	2.21129e-61	Pericyte	PPFIBP1
0	1.36548	0.234	0.001	0	Pericyte	COL3A1
0	1.35901	0.314	0.038	0	Pericyte	AHNAK
9.71137e-154	1.35438	0.432	0.122	1.32832e-149	Pericyte	TCF7L1
1.51555e-71	1.35266	0.641	0.486	2.07297e-67	Pericyte	RORA
1.61271e-27	1.33349	0.487	0.446	2.20586e-23	Pericyte	KDM5A
3.09534e-57	1.32791	0.539	0.351	4.23381e-53	Pericyte	FKBP5
9.82806e-46	1.31788	0.414	0.258	1.34428e-41	Pericyte	AKAP12
2.31291e-83	1.31698	0.728	0.552	3.1636e-79	Pericyte	ZEB1
1.32406e-20	1.31369	0.372	0.269	1.81105e-16	Pericyte	FLRT2
0.00136217	1.31007	0.273	0.28	1	Pericyte	FRMD3
3.12907e-38	1.30607	0.529	0.441	4.27994e-34	Pericyte	NBEAL1
1.46491e-61	1.29614	0.749	0.693	2.0037e-57	Pericyte	FOXP1
2.37395e-131	1.29148	0.47	0.154	3.24708e-127	Pericyte	GRAMD2B
8.37523e-52	1.29006	0.276	0.12	1.14556e-47	Pericyte	FRZB
6.50699e-120	1.28653	0.356	0.107	8.90025e-116	Pericyte	TNS2
2.54216e-39	1.28386	0.279	0.134	3.47717e-35	Pericyte	ITGA8
0	1.28303	0.25	0.024	0	Pericyte	COL18A1
2.01464e-48	1.2787	0.153	0.044	2.75562e-44	Pericyte	TRPM1
1.45646e-110	1.2769	0.746	0.446	1.99215e-106	Pericyte	ITPR2
1.66478e-111	1.27326	0.499	0.2	2.27708e-107	Pericyte	GSN
2.63019e-277	1.27107	0.241	0.027	3.59758e-273	Pericyte	COL6A2
8.2042e-13	1.26759	0.428	0.425	1.12217e-08	Pericyte	ADCY5
1.36876e-46	1.26487	0.512	0.394	1.87219e-42	Pericyte	CBLB
0	1.25975	0.23	0.018	0	Pericyte	LEF1
2.15101e-91	1.25743	0.201	0.045	2.94215e-87	Pericyte	A2M
6.21469e-22	1.25436	0.438	0.366	8.50045e-18	Pericyte	SNED1
8.89609e-21	1.25276	0.428	0.366	1.21681e-16	Pericyte	SESN3
0	4.20418	0.927	0.217	0	Ependymal	CFAP54
0	4.06017	0.946	0.162	0	Ependymal	HYDIN
0	3.97742	0.979	0.438	0	Ependymal	DNAH9
0	3.93693	0.899	0.041	0	Ependymal	DNAH11
5.92076e-198	3.72407	0.38	0.091	8.09841e-194	Ependymal	HTR2C
0	3.63433	0.918	0.341	0	Ependymal	TMEM232
0	3.50742	0.886	0.236	0	Ependymal	CCDC146
0	3.47683	0.964	0.365	0	Ependymal	NEK11
0	3.46078	0.958	0.355	0	Ependymal	DNAH6
0	3.41435	0.829	0.03	0	Ependymal	ZBBX
0	3.40648	0.84	0.12	0	Ependymal	DRC3
0	3.40113	0.747	0.015	0	Ependymal	SLC47A2
0	3.35342	0.845	0.094	0	Ependymal	LRRIQ1
0	3.32875	0.738	0.043	0	Ependymal	ADGB
0	3.28338	0.836	0.121	0	Ependymal	DNAH7
0	3.24443	0.866	0.105	0	Ependymal	CCDC60
0	3.2225	0.832	0.044	0	Ependymal	SPAG17
0	3.21641	0.936	0.263	0	Ependymal	CFAP70
0	3.14878	0.85	0.008	0	Ependymal	ARMC3
0	3.13287	0.827	0.046	0	Ependymal	FHAD1
0	3.13272	0.852	0.161	0	Ependymal	CFAP46
0	3.12471	0.791	0.033	0	Ependymal	SPATA17
0	3.10283	0.856	0.031	0	Ependymal	LRRC9
0	3.06317	0.881	0.111	0	Ependymal	CFAP44
0	3.04189	0.932	0.289	0	Ependymal	SPEF2
0	2.97276	0.732	0.098	0	Ependymal	DNAH10
0	2.94843	0.811	0.126	0	Ependymal	VWA3B
0	2.89363	0.751	0.107	0	Ependymal	DNAH2
0	2.86442	0.791	0.315	0	Ependymal	CRB1
3.53e-178	2.86188	0.223	0.036	4.82833e-174	Ependymal	TTR
0	2.85347	0.825	0.1	0	Ependymal	KIF27
0	2.83852	0.716	0.085	0	Ependymal	DNAH3
0	2.82777	0.897	0.199	0	Ependymal	PLEKHA7
0	2.79287	0.884	0.295	0	Ependymal	KIAA2012
0	2.77229	0.769	0.047	0	Ependymal	WDR63
0	2.76972	0.737	0.123	0	Ependymal	ANKFN1
0	2.67293	0.8	0.158	0	Ependymal	CROCC
0	2.66484	0.761	0.058	0	Ependymal	SPAG6
0	2.66287	0.67	0.042	0	Ependymal	CFAP100
0	2.64079	0.795	0.215	0	Ependymal	EFCAB6
0	2.63795	0.643	0.046	0	Ependymal	LRRC36
0	2.60805	0.882	0.245	0	Ependymal	MYO1E
0	2.59535	0.805	0.153	0	Ependymal	PPIL6
0	2.5938	0.693	0.072	0	Ependymal	CFAP52
0	2.59046	0.822	0.251	0	Ependymal	LRRC6
0	2.57963	0.738	0.043	0	Ependymal	DNAI1
0	2.57728	0.624	0.053	0	Ependymal	FRMPD2
0	2.56669	0.598	0.011	0	Ependymal	PI15
0	2.56343	0.841	0.214	0	Ependymal	RFX2
0	2.56317	0.687	0.071	0	Ependymal	DTHD1
0	2.56034	0.9	0.399	0	Ependymal	WDR78
0	2.5488	0.757	0.166	0	Ependymal	VWA3A
0	2.52258	0.779	0.291	0	Ependymal	AK8
0	2.5145	0.682	0.039	0	Ependymal	NWD1
0	2.48472	0.633	0.024	0	Ependymal	ARMC4
0	2.47093	0.614	0.015	0	Ependymal	CCDC170
0	2.4649	0.828	0.315	0	Ependymal	CCDC173
0	2.45714	0.659	0.072	0	Ependymal	LMNTD1
0	2.44518	0.612	0.153	0	Ependymal	S100B
0	2.42278	0.71	0.084	0	Ependymal	PPP1R42
0	2.41337	0.739	0.266	0	Ependymal	ANKMY1
0	2.4111	0.571	0.019	0	Ependymal	TTC29
0	2.37777	0.682	0.077	0	Ependymal	AK9
0	2.36334	0.75	0.125	0	Ependymal	DRC1
0	2.35814	0.752	0.151	0	Ependymal	ECT2L
5.20909e-272	2.33432	0.838	0.426	7.125e-268	Ependymal	RGS6
0	2.2994	0.65	0.045	0	Ependymal	CFAP73
0	2.2805	0.792	0.339	0	Ependymal	NME9
0	2.27067	0.698	0.147	0	Ependymal	PAMR1
0	2.25973	0.62	0.088	0	Ependymal	DNAH5
0	2.21158	0.665	0.107	0	Ependymal	EFCAB11
0	2.18116	0.956	0.621	0	Ependymal	PACRG
1.50725e-306	2.13002	0.801	0.354	2.06161e-302	Ependymal	CABCOCO1
0	2.12787	0.513	0.055	0	Ependymal	KATNAL2
0	2.11745	0.788	0.351	0	Ependymal	CFAP69
2.31306e-250	2.11109	0.92	0.685	3.16381e-246	Ependymal	DTNA
0	2.09529	0.614	0.002	0	Ependymal	LHB
0	2.09279	0.669	0.106	0	Ependymal	TTLL9
1.81884e-271	2.06027	0.768	0.369	2.48781e-267	Ependymal	CFAP221
0	2.04968	0.562	0.037	0	Ependymal	C2orf73
0	2.04197	0.788	0.349	0	Ependymal	RGS22
2.3301e-287	2.03813	0.906	0.595	3.18711e-283	Ependymal	SPAG16
0	2.036	0.705	0.257	0	Ependymal	LRGUK
0	2.03307	0.617	0.075	0	Ependymal	CCDC40
0	2.03006	0.671	0.217	0	Ependymal	OCA2
1.46669e-152	2.02795	0.193	0.031	2.00613e-148	Ependymal	PRLR
0	2.01857	0.607	0.041	0	Ependymal	RIBC2
1.20736e-252	2.01278	0.807	0.462	1.65142e-248	Ependymal	CEP126
1.39546e-90	2.01249	0.227	0.062	1.9087e-86	Ependymal	RBM47
1.41291e-146	2.00708	0.404	0.13	1.93257e-142	Ependymal	MALRD1
4.10529e-249	2.00658	0.864	0.569	5.61522e-245	Ependymal	CCDC30
0	2.00364	0.582	0.033	0	Ependymal	TEKT1
6.81417e-236	1.99802	0.687	0.29	9.32042e-232	Ependymal	FAM184A
0	1.99711	0.543	0.06	0	Ependymal	AK7
1.17132e-225	1.9876	0.37	0.078	1.60213e-221	Ependymal	SULF1
1.2205e-264	1.98193	0.765	0.356	1.6694e-260	Ependymal	IQCA1
0	1.98036	0.675	0.165	0	Ependymal	PLCH1
5.9385e-293	1.95462	0.843	0.418	8.12268e-289	Ependymal	PLCB4
5.9937e-174	1.94844	0.226	0.038	8.19818e-170	Ependymal	SLC39A12
0	1.9343	0.507	0.053	0	Ependymal	STK33
0	1.93162	0.66	0.17	0	Ependymal	SPAG1
1.68833e-282	1.93126	0.751	0.327	2.30929e-278	Ependymal	CCDC138
1.99929e-282	1.91533	0.865	0.526	2.73464e-278	Ependymal	ARMC2
0	1.91382	0.543	0.08	0	Ependymal	RSPH1
0	1.90748	0.62	0.119	0	Ependymal	CFAP74
0	1.90074	0.985	0.744	0	Ependymal	MSI2
6.93842e-153	1.89397	0.302	0.072	9.49038e-149	Ependymal	IGFBP7
1.44286e-61	1.89201	0.454	0.273	1.97354e-57	Ependymal	SDK1
0	1.89058	0.598	0.108	0	Ependymal	FAM227A
0	1.8846	0.573	0.033	0	Ependymal	JHY
0	1.88107	0.616	0.164	0	Ependymal	MYCBPAP
0	1.87408	0.587	0.147	0	Ependymal	WDR66
0	1.86233	0.679	0.121	0	Ependymal	TCF7L1
0	1.8567	0.502	0.047	0	Ependymal	BBOX1
0	1.85625	0.58	0.064	0	Ependymal	FBLN1
0	1.85188	0.504	0.069	0	Ependymal	CFAP77
0	1.84793	0.999	0.919	0	Ependymal	SYNE1
6.21231e-273	1.84695	0.869	0.517	8.4972e-269	Ependymal	FBXL13
1.23729e-232	1.84367	0.841	0.53	1.69236e-228	Ependymal	NEK10
0	1.84198	0.512	0.021	0	Ependymal	DNAH1
3.02222e-248	1.84169	0.879	0.589	4.1338e-244	Ependymal	ULK4
0	1.83843	0.549	0.069	0	Ependymal	STK32A
3.21278e-256	1.83466	0.824	0.473	4.39444e-252	Ependymal	MOK
0	1.83347	0.614	0.106	0	Ependymal	EFHC1
0	1.81721	0.512	0.044	0	Ependymal	ANKUB1
0	1.80289	0.517	0.068	0	Ependymal	CDKL4
0	1.8016	0.558	0.123	0	Ependymal	NEK5
0	1.7831	0.556	0.091	0	Ependymal	IQCG
1.78431e-275	1.77893	0.639	0.217	2.44058e-271	Ependymal	FANK1
3.36504e-227	1.77677	0.728	0.362	4.6027e-223	Ependymal	CASC1
0.000222329	1.77301	0.507	0.629	1	Ependymal	TRPM3
7.05587e-172	1.76953	0.745	0.434	9.65102e-168	Ependymal	ANKRD44
0	1.76557	0.574	0.151	0	Ependymal	DNAJB13
1.2129e-303	1.74157	0.765	0.256	1.659e-299	Ependymal	SOX6
2.33558e-146	1.73761	0.211	0.038	3.19461e-142	Ependymal	SLC13A4
8.50339e-226	1.73633	0.637	0.258	1.16309e-221	Ependymal	TTC26
0	1.72429	0.498	0.059	0	Ependymal	MAK
0	1.70479	0.471	0.027	0	Ependymal	LRRC23
0	1.70416	0.497	0.1	0	Ependymal	MAP3K19
5.03519e-224	1.7024	0.402	0.094	6.88713e-220	Ependymal	AK1
0	1.69433	0.487	0.022	0	Ependymal	CCDC180
8.66336e-245	1.69304	0.558	0.173	1.18497e-240	Ependymal	STPG4
0	1.69248	0.547	0.086	0	Ependymal	SNTB1
2.20686e-220	1.68827	0.714	0.355	3.01855e-216	Ependymal	TMEM67
0	1.68041	0.406	0.043	0	Ependymal	DCDC2
3.8211e-24	1.66704	0.297	0.195	5.2265e-20	Ependymal	SLC24A4
2.15502e-172	1.66224	0.377	0.098	2.94763e-168	Ependymal	ITPKB
0	1.66137	0.493	0.002	0	Ependymal	FAM81B
2.93912e-258	1.65855	0.991	0.742	4.02013e-254	Ependymal	PRKG1
0	1.65723	0.353	0.034	0	Ependymal	SLC28A1
0	4.65077	0.907	0.04	0	Endothelial	MECOM
0	4.63352	0.885	0.021	0	Endothelial	FLT1
0	4.10947	0.852	0.206	0	Endothelial	SLC7A1
0	3.72236	0.885	0.365	0	Endothelial	TBC1D4
0	3.70371	0.835	0.039	0	Endothelial	EPAS1
0	3.67954	0.787	0.066	0	Endothelial	EBF1
0	3.49435	0.82	0.045	0	Endothelial	FLI1
0	3.46004	0.733	0.036	0	Endothelial	EMCN
0	3.36881	0.718	0.013	0	Endothelial	ADGRL4
0	3.31469	0.738	0.016	0	Endothelial	LEF1
0	3.25143	0.764	0.05	0	Endothelial	ERG
0	3.17314	0.72	0.071	0	Endothelial	ABCB1
0	3.14695	0.746	0.094	0	Endothelial	EGFL7
0	3.09047	0.85	0.216	0	Endothelial	UTRN
0	3.07209	0.742	0.141	0	Endothelial	CYYR1
0	3.04467	0.668	0.09	0	Endothelial	SLC2A1
0	2.89314	0.657	0.148	0	Endothelial	PODXL
0	2.81907	0.668	0.119	0	Endothelial	SLCO1A2
0	2.77875	0.56	0.077	0	Endothelial	HMCN1
0	2.74583	0.612	0.044	0	Endothelial	GALNT15
0	2.72396	0.579	0.013	0	Endothelial	ADGRF5
0	2.72346	0.547	0.086	0	Endothelial	SLCO1B1
0	2.66087	0.417	0.017	0	Endothelial	ITM2A
1.46474e-239	2.65208	0.803	0.359	2.00348e-235	Endothelial	PTPRB
0	2.64679	0.826	0.237	0	Endothelial	RBMS3
0	2.62117	0.592	0.115	0	Endothelial	VWF
0	2.62073	0.584	0.031	0	Endothelial	PECAM1
1.16739e-303	2.6005	0.933	0.39	1.59676e-299	Endothelial	PTPRM
0	2.59238	0.534	0.02	0	Endothelial	CGNL1
4.08526e-279	2.58765	0.445	0.072	5.58782e-275	Endothelial	IGFBP7
3.22719e-236	2.53071	0.57	0.141	4.41415e-232	Endothelial	JAM2
1.24251e-276	2.52913	0.792	0.242	1.69951e-272	Endothelial	TMEM132C
9.35935e-293	2.52317	0.668	0.167	1.28017e-288	Endothelial	HEG1
0	2.46771	0.518	0.013	0	Endothelial	SLC38A5
0	2.43705	0.516	0.002	0	Endothelial	TNFSF10
0	2.37924	0.551	0.039	0	Endothelial	ENG
1.07973e-201	2.37136	0.518	0.132	1.47685e-197	Endothelial	NET1
5.45853e-224	2.34456	0.547	0.134	7.46617e-220	Endothelial	DACH1
0	2.33411	0.586	0.067	0	Endothelial	ARHGAP29
0	2.29352	0.583	0.045	0	Endothelial	SLCO2B1
7.46142e-173	2.27248	0.547	0.162	1.02057e-168	Endothelial	MYO10
5.94367e-181	2.26883	0.623	0.215	8.12975e-177	Endothelial	ITGA6
4.05166e-161	2.24846	0.774	0.42	5.54187e-157	Endothelial	PLCB4
3.33608e-163	2.24363	0.204	0.024	4.56309e-159	Endothelial	IGFBP3
2.86014e-84	2.19319	0.672	0.464	3.91211e-80	Endothelial	IGF1R
1.23075e-230	2.19008	0.638	0.182	1.68342e-226	Endothelial	FMNL3
9.54114e-102	2.18674	0.538	0.25	1.30504e-97	Endothelial	ACER2
0	2.17845	0.399	0.012	0	Endothelial	SMAD6
4.30301e-143	2.14559	0.603	0.233	5.88565e-139	Endothelial	CSGALNACT1
0	2.14088	0.531	0.035	0	Endothelial	TRIM22
1.61902e-122	2.11225	0.638	0.319	2.2145e-118	Endothelial	GPCPD1
0	2.11188	0.505	0.065	0	Endothelial	PGM5
2.27327e-145	2.09382	0.536	0.187	3.10938e-141	Endothelial	TFRC
0	2.08958	0.514	0.041	0	Endothelial	IFI16
0	2.063	0.549	0.091	0	Endothelial	CDC14A
4.35413e-296	2.06299	0.551	0.104	5.95558e-292	Endothelial	RCSD1
2.66561e-253	2.04756	0.649	0.171	3.64602e-249	Endothelial	SYNE2
6.03597e-258	2.04287	0.417	0.067	8.256e-254	Endothelial	FN1
1.4547e-62	2.04007	0.564	0.382	1.98974e-58	Endothelial	INSR
4.66177e-291	2.03773	0.508	0.091	6.37636e-287	Endothelial	TNS1
4.48782e-116	2.00707	0.737	0.519	6.13844e-112	Endothelial	SLC39A10
5.16441e-239	2.00076	0.722	0.204	7.06389e-235	Endothelial	CLIC4
8.65838e-194	1.97576	0.607	0.182	1.18429e-189	Endothelial	FGD6
1.31542e-281	1.97249	0.575	0.114	1.79923e-277	Endothelial	ARHGAP31
1.49503e-111	1.97072	0.57	0.262	2.0449e-107	Endothelial	NXN
4.94147e-118	1.96938	0.714	0.479	6.75894e-114	Endothelial	LMBR1
1.9389e-82	1.93852	0.66	0.492	2.65203e-78	Endothelial	ESYT2
0	1.9313	0.456	0.058	0	Endothelial	PRTG
2.54699e-243	1.91896	0.473	0.092	3.48377e-239	Endothelial	TEK
2.0645e-84	1.91071	0.588	0.351	2.82383e-80	Endothelial	ATL2
6.69272e-156	1.90541	0.85	0.581	9.1543e-152	Endothelial	ABLIM1
1.08639e-74	1.89721	0.622	0.45	1.48597e-70	Endothelial	RUNDC3B
1.58792e-119	1.89215	0.866	0.77	2.17196e-115	Endothelial	TSPAN5
1.71666e-113	1.88365	0.482	0.179	2.34805e-109	Endothelial	RHOBTB1
0	1.87605	0.414	0.035	0	Endothelial	ETS1
2.65361e-156	1.86755	0.887	0.737	3.62961e-152	Endothelial	DOCK9
5.60652e-214	1.86663	0.436	0.083	7.6686e-210	Endothelial	LAMA4
2.23367e-268	1.86641	0.503	0.093	3.05522e-264	Endothelial	SP100
0	1.86301	0.347	0.036	0	Endothelial	CLEC3B
2.31055e-100	1.84939	0.518	0.216	3.16037e-96	Endothelial	TIMP3
0	1.83778	0.345	0.023	0	Endothelial	ITGA1
0	1.8338	0.38	0.02	0	Endothelial	TFPI
0	1.82583	0.406	0.031	0	Endothelial	OCLN
8.99628e-284	1.82344	0.425	0.064	1.23051e-279	Endothelial	ST3GAL1
1.41087e-116	1.81712	0.575	0.25	1.92979e-112	Endothelial	RBMS1
7.51949e-285	1.81368	0.416	0.059	1.02852e-280	Endothelial	PROM1
1.09214e-77	1.81339	0.557	0.326	1.49382e-73	Endothelial	SGPP2
9.18387e-248	1.80976	0.384	0.059	1.25617e-243	Endothelial	PLAT
7.56041e-72	1.80912	0.484	0.235	1.03411e-67	Endothelial	ST6GAL1
0	1.80516	0.416	0.038	0	Endothelial	AHNAK
1.56516e-244	1.7985	0.382	0.059	2.14083e-240	Endothelial	BACE2
0	1.79394	0.384	0.016	0	Endothelial	NOSTRIN
9.74401e-191	1.78471	0.438	0.097	1.33279e-186	Endothelial	ADGRA2
1.74945e-150	1.7725	0.57	0.184	2.3929e-146	Endothelial	PDLIM5
4.3021e-121	1.77237	0.842	0.635	5.88441e-117	Endothelial	MYRIP
9.74168e-245	1.77148	0.391	0.061	1.33247e-240	Endothelial	IGF2BP2
3.59589e-121	1.7699	0.722	0.379	4.91846e-117	Endothelial	LHFPL6
0	1.75798	0.341	0.026	0	Endothelial	FLVCR2
1.05214e-58	1.75716	0.538	0.34	1.43912e-54	Endothelial	SGMS1
1.30744e-294	1.7544	0.429	0.063	1.78831e-290	Endothelial	TMEM44
0	1.74162	0.46	0.059	0	Endothelial	TGFBR2
0	1.73766	0.223	0.006	0	Endothelial	IFI27
6.46512e-138	1.73435	0.471	0.14	8.84299e-134	Endothelial	UACA
5.41137e-56	1.73244	0.423	0.217	7.40167e-52	Endothelial	NAMPT
2.40942e-154	1.73012	0.876	0.727	3.2956e-150	Endothelial	BMPR2
4.98033e-134	1.72643	0.284	0.054	6.81209e-130	Endothelial	ADGRG6
0	1.72564	0.356	0.03	0	Endothelial	SLC39A8
0	1.72124	0.336	0.015	0	Endothelial	ITIH5
4.85686e-70	1.71923	0.499	0.27	6.64321e-66	Endothelial	SNRK
0	1.71739	0.31	0.002	0	Endothelial	KANK3
4.46809e-66	1.6852	0.542	0.333	6.11146e-62	Endothelial	CLINT1
1.18566e-115	1.6843	0.688	0.355	1.62174e-111	Endothelial	LDLRAD3
6.93087e-264	1.68414	0.404	0.061	9.48004e-260	Endothelial	LIMS2
2.8544e-74	1.67913	0.475	0.233	3.90425e-70	Endothelial	HERPUD1
1.65893e-120	1.67463	0.308	0.069	2.26908e-116	Endothelial	CD320
2.9832e-136	1.67333	0.36	0.084	4.08043e-132	Endothelial	NEDD9
0	1.66722	0.314	0.024	0	Endothelial	WWTR1
2.37464e-114	1.66578	0.466	0.152	3.24803e-110	Endothelial	TRPM6
1.87341e-69	1.65208	0.607	0.416	2.56245e-65	Endothelial	WWC2
1.47006e-78	1.64855	0.636	0.429	2.01074e-74	Endothelial	ACVR1
1.99786e-66	1.64488	0.464	0.234	2.73267e-62	Endothelial	SHROOM2
0	1.63782	0.354	0.024	0	Endothelial	FGD5
1.35709e-35	1.63532	0.534	0.421	1.85622e-31	Endothelial	SLC12A2
0	1.63284	0.278	0.008	0	Endothelial	ID1
3.44271e-200	1.63059	0.991	0.843	4.70894e-196	Endothelial	PTPRG
5.05942e-49	1.61629	0.13	0.028	6.92028e-45	Endothelial	RGS5
3.95633e-70	1.59417	0.603	0.412	5.41147e-66	Endothelial	CTNNB1
9.10273e-62	1.58088	0.555	0.367	1.24507e-57	Endothelial	MYH9
6.00453e-77	1.5787	0.703	0.527	8.213e-73	Endothelial	PPFIBP1
0	1.54647	0.321	0.008	0	Endothelial	PAQR5
4.39572e-69	1.54097	0.455	0.22	6.01247e-65	Endothelial	CD2AP
3.62156e-92	1.53793	0.503	0.201	4.95357e-88	Endothelial	GSN
1.45528e-37	1.53598	0.768	0.75	1.99053e-33	Endothelial	ARL15
2.44074e-79	1.52861	0.499	0.24	3.33845e-75	Endothelial	CFLAR
2.67186e-259	1.52408	0.367	0.05	3.65457e-255	Endothelial	LMCD1
9.47359e-79	1.51499	0.642	0.417	1.2958e-74	Endothelial	CTNND1
3.37385e-117	1.51463	0.353	0.091	4.61476e-113	Endothelial	JCAD
4.451e-275	1.51122	0.354	0.045	6.08808e-271	Endothelial	FZD6
1.36733e-94	1.50925	0.826	0.693	1.87023e-90	Endothelial	FOXP1
2.73385e-177	1.50827	0.332	0.059	3.73936e-173	Endothelial	RPH3AL
1.06447e-61	1.50451	0.555	0.332	1.45598e-57	Endothelial	FAT4
1.06017e-46	1.50348	0.518	0.347	1.4501e-42	Endothelial	ADGRL2
8.63387e-115	1.49616	0.308	0.07	1.18094e-110	Endothelial	RBPMS
4.04367e-97	1.49375	0.8	0.659	5.53093e-93	Endothelial	MRTFB
1.79185e-204	1.49169	0.356	0.059	2.4509e-200	Endothelial	DOCK6
7.15665e-114	1.49035	0.351	0.093	9.78887e-110	Endothelial	EXPH5
3.21126e-272	1.48559	0.34	0.042	4.39236e-268	Endothelial	RIN3
1.15358e-129	1.48557	0.889	0.83	1.57787e-125	Endothelial	SPTBN1
5.42052e-104	1.4783	0.425	0.138	7.41418e-100	Endothelial	RASSF3
1.00101e-50	1.47829	0.618	0.513	1.36918e-46	Endothelial	ARFGEF2
0	3.80486	0.915	0.198	0	Microglia	VAV3
0	3.79104	0.876	0.047	0	Microglia	INPP5D
0	3.73187	0.89	0.051	0	Microglia	APBB1IP
0	3.70596	0.814	0.091	0	Microglia	ENTPD1
0	3.49272	0.88	0.17	0	Microglia	ARHGAP15
0	3.35439	0.983	0.621	0	Microglia	PLXDC2
0	3.2117	0.816	0.029	0	Microglia	DOCK8
0	3.13561	0.707	0.021	0	Microglia	A2M
0	3.05439	0.81	0.079	0	Microglia	DOCK2
0	2.99548	0.967	0.6	0	Microglia	ST6GALNAC3
0	2.87513	0.788	0.336	0	Microglia	FKBP5
0	2.79015	0.724	0.111	0	Microglia	MERTK
0	2.78403	0.692	0.023	0	Microglia	SLCO2B1
0	2.76237	0.781	0.392	0	Microglia	RTTN
0	2.74122	0.643	0.018	0	Microglia	CSF1R
0	2.73232	0.617	0.056	0	Microglia	ADAM28
0	2.70323	0.665	0.029	0	Microglia	FYB1
0	2.66487	0.95	0.667	0	Microglia	MEF2A
0	2.57832	0.803	0.244	0	Microglia	IPCEF1
0	2.5128	0.627	0.09	0	Microglia	ARHGAP24
0	2.50925	0.93	0.549	0	Microglia	ARHGAP22
0	2.48654	0.595	0.018	0	Microglia	MS4A7
0	2.48123	0.726	0.163	0	Microglia	FMNL3
0	2.46735	0.613	0.176	0	Microglia	FAM149A
0	2.4574	0.642	0.025	0	Microglia	FLI1
0	2.42444	0.611	0.01	0	Microglia	IKZF1
0	2.37548	0.651	0.116	0	Microglia	ATP8B4
0	2.3713	0.64	0.06	0	Microglia	PLCG2
0	2.36025	0.548	0.042	0	Microglia	TGFBR2
0	2.35274	0.715	0.26	0	Microglia	ABCC4
0	2.34473	0.893	0.551	0	Microglia	CAPZB
0	2.3377	0.81	0.191	0	Microglia	BNC2
0	2.32653	0.76	0.291	0	Microglia	AP1B1
0	2.31706	0.551	0.032	0	Microglia	GAB3
0	2.30597	0.946	0.651	0	Microglia	SORL1
0	2.30544	0.347	0.02	0	Microglia	PALD1
0	2.30536	0.6	0.074	0	Microglia	SCML4
0	2.30164	0.618	0.086	0	Microglia	RCSD1
0	2.29488	0.918	0.547	0	Microglia	FCHSD2
0	2.28111	0.643	0.184	0	Microglia	SKAP2
0	2.2682	0.503	0.02	0	Microglia	RUNX1
0	2.26121	0.963	0.711	0	Microglia	SLC9A9
0	2.25931	0.58	0.046	0	Microglia	BLNK
0	2.24372	0.703	0.208	0	Microglia	ZFHX3
0	2.21277	0.515	0.023	0	Microglia	PTPRC
0	2.2006	0.557	0.011	0	Microglia	BIN2
0	2.18555	0.541	0.024	0	Microglia	IFI16
0	2.16036	0.606	0.121	0	Microglia	RNASET2
0	2.14667	0.564	0.03	0	Microglia	LYN
0	2.14573	0.776	0.297	0	Microglia	TMCC3
0	2.14269	0.94	0.612	0	Microglia	GAB2
0	2.13517	0.438	0.011	0	Microglia	MRC1
0	2.12999	0.556	0.044	0	Microglia	RBM47
0	2.12946	0.506	0.019	0	Microglia	TRIM22
0	2.12367	0.598	0.117	0	Microglia	TGFB1
0	2.12083	0.548	0.032	0	Microglia	AOAH
0	2.11744	0.518	0.01	0	Microglia	LCP2
0	2.10449	0.462	0.008	0	Microglia	MNDA
0	2.10439	0.854	0.558	0	Microglia	ABR
0	2.09704	0.933	0.588	0	Microglia	ASTN2
0	2.08038	0.677	0.275	0	Microglia	GUCY1A1
0	2.07361	0.488	0.015	0	Microglia	SLC2A5
0	2.06792	0.614	0.143	0	Microglia	TGFBR1
0	2.04951	0.521	0.17	0	Microglia	IFNGR1
0	2.03645	0.519	0.012	0	Microglia	WDFY4
0	2.03443	0.503	0.019	0	Microglia	ITGAM
0	2.02382	0.728	0.341	0	Microglia	DEPTOR
0	2.01126	0.326	0.01	0	Microglia	C1QC
0	2.00779	0.495	0.015	0	Microglia	TBXAS1
0	1.98984	0.534	0.244	0	Microglia	APOE
0	1.98343	0.447	0.055	0	Microglia	PLA2G4A
0	1.98339	0.506	0.024	0	Microglia	RGS10
0	1.97936	0.42	0.054	0	Microglia	P2RY12
0	1.97645	0.83	0.421	0	Microglia	ANKRD44
0	1.97612	0.493	0.051	0	Microglia	PGM5
0	1.97338	0.481	0.017	0	Microglia	PIK3R5
0	1.96643	0.716	0.347	0	Microglia	SFMBT2
0	1.96301	0.518	0.102	0	Microglia	VWF
0	1.92069	0.466	0.033	0	Microglia	C3
0	1.91486	0.421	0.009	0	Microglia	CX3CR1
0	1.90858	0.945	0.779	0	Microglia	SNX29
0	1.90314	0.307	0.011	0	Microglia	C1QB
0	1.89032	0.856	0.514	0	Microglia	MTSS1
0	1.88858	0.746	0.405	0	Microglia	LRMDA
0	1.88767	0.758	0.405	0	Microglia	CTNND1
0	1.88674	0.878	0.639	0	Microglia	FOXN3
0	1.88307	0.29	0.036	0	Microglia	CD163
0	1.87895	0.774	0.441	0	Microglia	EPS15
0	1.87786	0.811	0.311	0	Microglia	PLD1
0	1.87614	0.47	0.012	0	Microglia	SYK
0	1.85936	0.985	0.675	0	Microglia	ELMO1
0	1.85936	0.909	0.711	0	Microglia	PICALM
0	1.83696	0.393	0.012	0	Microglia	AIM2
0	1.83155	0.683	0.392	0	Microglia	LRP11
0	1.82924	0.608	0.267	0	Microglia	IFNGR2
0	1.82579	0.554	0.132	0	Microglia	ITGB5
0	1.81845	0.501	0.114	0	Microglia	PRCP
0	1.81115	0.441	0.025	0	Microglia	PIK3AP1
0	1.79696	0.632	0.322	0	Microglia	SIPA1L2
0	1.79687	0.687	0.418	0	Microglia	PDE3B
0	1.78548	0.672	0.275	0	Microglia	ETV6
0	1.77299	0.448	0.041	0	Microglia	NFATC2
0	1.76044	0.44	0.02	0	Microglia	NCKAP1L
0	1.75348	0.881	0.431	0	Microglia	ITPR2
0	1.74829	0.446	0.015	0	Microglia	PLCB2
0	1.74148	0.403	0.008	0	Microglia	LAPTM5
0	1.73654	0.273	0.014	0	Microglia	SLC11A1
0	1.71058	0.416	0.009	0	Microglia	FGD2
0	1.70767	0.485	0.152	0	Microglia	ST8SIA4
0	1.69948	0.537	0.104	0	Microglia	RUBCNL
0	1.69428	0.846	0.596	0	Microglia	LDLRAD4
0	1.69228	0.827	0.362	0	Microglia	PREX1
0	1.68925	0.765	0.434	0	Microglia	FGD4
0	1.67707	0.354	0.09	0	Microglia	DAB2
0	1.66569	0.441	0.027	0	Microglia	SP110
0	1.66178	0.547	0.194	0	Microglia	CYFIP1
0	1.65028	0.636	0.321	0	Microglia	PACSIN2
0	1.63765	0.361	0.07	0	Microglia	CLCN5
0	1.63689	0.633	0.353	0	Microglia	RUNX2
0	1.63548	0.649	0.417	0	Microglia	SMAP2
0	1.62947	0.409	0.015	0	Microglia	VAV1
0	1.6223	0.593	0.423	0	Microglia	SYNDIG1
0	1.62187	0.463	0.081	0	Microglia	SP100
0	1.61678	0.771	0.44	0	Microglia	MAN1A1
0	1.61497	0.903	0.57	0	Microglia	MEF2C
0	1.60877	0.385	0.015	0	Microglia	HCK
0	1.59815	0.903	0.674	0	Microglia	EPB41L2
0	1.59538	0.94	0.839	0	Microglia	SSH2
0	1.59427	0.427	0.072	0	Microglia	LRRK1
0	1.58804	0.377	0.091	0	Microglia	THSD4
0	1.56926	0.445	0.118	0	Microglia	NRROS
0	1.55447	0.466	0.08	0	Microglia	ZFP36L1
0	1.54798	0.369	0.03	0	Microglia	TNFRSF1B
0	1.54217	0.675	0.439	0	Microglia	ARRB1
0	1.53926	0.847	0.635	0	Microglia	NAV3
0	1.53524	0.935	0.849	0	Microglia	MED13L
0	1.52902	0.91	0.728	0	Microglia	SH3RF3
0	1.52645	0.779	0.554	0	Microglia	LRCH1
0	1.52616	0.497	0.191	0	Microglia	DOCK11
0	1.52395	0.471	0.228	0	Microglia	LGMN
0	1.51038	0.681	0.468	0	Microglia	RAPGEF1
0	1.50955	0.345	0.029	0	Microglia	TMIGD3
0	1.50379	0.357	0.023	0	Microglia	VSIR
0	1.49691	0.663	0.398	0	Microglia	IKBKB
0	1.49653	0.361	0.026	0	Microglia	CMKLR1
0	1.49031	0.75	0.624	0	Microglia	ZSWIM6
0	1.48712	0.728	0.53	0	Microglia	ANKS1A
0	1.48376	0.825	0.523	0	Microglia	MAML3
0	1.48311	0.917	0.711	0	Microglia	KCNQ3
0	1.47883	0.593	0.358	0	Microglia	TBC1D4
0	4.77669	0.993	0.42	0	OPC	LHFPL3
0	3.62225	0.968	0.214	0	OPC	SOX6
0	3.37882	0.981	0.417	0	OPC	PCDH15
0	3.33322	0.904	0.201	0	OPC	VCAN
0	3.0843	0.992	0.58	0	OPC	PTPRZ1
0	2.81394	0.909	0.177	0	OPC	COL9A1
0	2.80431	0.99	0.64	0	OPC	XYLT1
0	2.75408	0.963	0.521	0	OPC	TNR
0	2.72924	0.719	0.032	0	OPC	STK32A
0	2.66234	0.893	0.204	0	OPC	TMEM132C
0	2.63991	0.867	0.332	0	OPC	MEGF11
0	2.63332	0.936	0.206	0	OPC	NXPH1
0	2.59539	0.968	0.694	0	OPC	EPN2
0	2.55509	0.945	0.535	0	OPC	KIF13A
0	2.51505	0.972	0.577	0	OPC	SLC35F1
0	2.49752	0.971	0.438	0	OPC	LUZP2
0	2.40683	0.875	0.322	0	OPC	SULF2
0	2.32972	0.948	0.667	0	OPC	NOVA1
0	2.28301	0.466	0.302	0	OPC	CHST11
0	2.27839	0.579	0.085	0	OPC	ADAM12
0	2.25035	0.891	0.372	0	OPC	NTNG1
0	2.24513	0.829	0.283	0	OPC	RIN2
0	2.21902	0.975	0.678	0	OPC	MMP16
0	2.20982	0.883	0.475	0	OPC	TNK2
0	2.17123	0.809	0.351	0	OPC	CHST9
0	2.15713	0.845	0.352	0	OPC	PDGFRA
0	2.14773	0.609	0.031	0	OPC	AFAP1L2
0	2.13967	0.955	0.526	0	OPC	CA10
0	2.04625	0.945	0.514	0	OPC	HIP1
0	2.0372	0.667	0.226	0	OPC	MAP3K1
0	2.03677	0.988	0.682	0	OPC	GRID2
0	2.01594	0.767	0.191	0	OPC	SMOC1
0	1.99259	0.545	0.048	0	OPC	SLC22A3
0	1.96641	0.898	0.531	0	OPC	ZEB1
0	1.95734	0.677	0.112	0	OPC	BCAN
0	1.95603	0.99	0.777	0	OPC	KAZN
0	1.91684	0.754	0.295	0	OPC	DISC1
0	1.89676	0.94	0.56	0	OPC	SEMA5A
0	1.87667	0.451	0.204	0	OPC	BRINP3
0	1.87148	0.556	0.112	0	OPC	ADAMTS17
0	1.86682	0.75	0.251	0	OPC	BCAS1
0	1.84319	0.699	0.191	0	OPC	PLD5
0	1.83344	0.682	0.186	0	OPC	KCNIP1
0	1.81239	0.76	0.364	0	OPC	GRIA4
0	1.80114	0.515	0.09	0	OPC	CA8
0	1.76401	0.956	0.666	0	OPC	DSCAM
0	1.74816	0.814	0.339	0	OPC	KAT2B
0	1.72658	0.915	0.653	0	OPC	SCD5
0	1.71922	0.629	0.208	0	OPC	GALNT10
0	1.70663	0.52	0.057	0	OPC	LAMA4
0	1.70145	0.708	0.16	0	OPC	ZCCHC24
0	1.6977	0.993	0.791	0	OPC	DPP6
0	1.67633	0.476	0.101	0	OPC	CACNG4
0	1.6746	0.441	0.048	0	OPC	SUSD5
0	1.66707	0.613	0.255	0	OPC	ITGA9
0	1.6548	0.561	0.18	0	OPC	MYT1
0	1.65015	0.421	0.031	0	OPC	CALCRL
0	1.64588	0.69	0.277	0	OPC	TNS3
0	1.59675	0.427	0.048	0	OPC	ROR2
0	1.57981	0.434	0.019	0	OPC	C1QL1
0	1.57547	0.841	0.492	0	OPC	UST
0	1.56184	0.969	0.736	0	OPC	KCND2
0	1.53991	0.607	0.337	0	OPC	ST8SIA1
0	1.5272	0.78	0.465	0	OPC	MPPED2
0	1.52555	0.988	0.907	0	OPC	AGAP1
0	1.51918	0.754	0.481	0	OPC	SAMD4A
0	1.50449	0.886	0.689	0	OPC	NLGN4Y
0	1.4948	0.583	0.196	0	OPC	CCDC50
0	1.48873	0.853	0.667	0	OPC	CASK
0	1.46331	0.943	0.579	0	OPC	ASTN2
0	1.46251	0.488	0.128	0	OPC	PLPP4
0	1.45476	0.785	0.452	0	OPC	COL11A1
0	1.45412	0.82	0.545	0	OPC	KLF12
0	1.44358	0.626	0.173	0	OPC	CDH19
0	1.44024	0.79	0.512	0	OPC	PID1
0	1.43586	0.432	0.243	0	OPC	BMPER
0	1.42462	0.851	0.597	0	OPC	OPHN1
0	1.4238	0.873	0.684	0	OPC	REV3L
0	1.42217	0.74	0.5	0	OPC	LRP1
0	1.42108	0.738	0.473	0	OPC	PHYHIPL
0	1.42021	0.802	0.35	0	OPC	SORCS1
0	1.39232	0.961	0.684	0	OPC	SGCZ
0	1.39107	0.868	0.541	0	OPC	FCHSD2
0	1.38422	0.466	0.144	0	OPC	WSCD1
0	1.38024	0.362	0.005	0	OPC	NKAIN4
0	1.36719	0.937	0.672	0	OPC	SGK1
0	1.36211	0.503	0.232	0	OPC	MAMLD1
0	1.35335	0.942	0.777	0	OPC	NRCAM
0	1.35242	0.957	0.731	0	OPC	MAML2
0	1.34964	0.388	0.085	0	OPC	GFRA1
0	1.34797	0.861	0.599	0	OPC	SH3D19
0	1.33961	0.445	0.223	0	OPC	ST6GAL1
0	1.33536	0.601	0.16	0	OPC	ATP13A4
0	1.33339	0.45	0.092	0	OPC	LRP4
2.37577e-81	1.33315	0.548	0.536	3.24958e-77	OPC	TMEM108
0	1.32618	0.575	0.161	0	OPC	PDLIM5
0	1.31876	0.477	0.219	0	OPC	CSGALNACT1
0	1.31609	0.388	0.075	0	OPC	APOD
0	1.31607	0.495	0.285	0	OPC	PEAK1
0	1.3109	0.627	0.446	0	OPC	SLC1A1
0	1.30772	0.906	0.682	0	OPC	CACNA1A
0	1.29084	0.568	0.373	0	OPC	FAM184B
0	1.28947	0.667	0.438	0	OPC	GLCCI1
0	1.28263	0.797	0.509	0	OPC	MTSS1
0	1.28063	0.303	0.027	0	OPC	FERMT1
0	1.27112	0.997	0.913	0	OPC	LRP1B
0	1.25634	0.524	0.249	0	OPC	ETV1
0	1.2536	0.643	0.439	0	OPC	SEZ6L
0	1.24589	0.382	0.11	0	OPC	ANKRD55
0	1.23768	0.424	0.17	0	OPC	CSPG5
0	1.23542	0.513	0.24	0	OPC	SPATA6
0	1.23395	0.382	0.066	0	OPC	TRAF4
0	1.22179	0.618	0.478	0	OPC	FHIT
0	1.20853	0.479	0.236	0	OPC	RANBP17
0	1.20746	0.293	0.032	0	OPC	SPRY4
0	1.198	0.498	0.201	0	OPC	EGFR
0	1.17715	0.969	0.793	0	OPC	ADGRL3
0	1.1755	0.655	0.371	0	OPC	TCF7L2
0	1.1647	0.8	0.51	0	OPC	ALCAM
0	1.16257	0.891	0.618	0	OPC	KHDRBS3
0	1.15869	0.644	0.437	0	OPC	PLPPR1
0	1.1581	0.737	0.4	0	OPC	SORCS3
0	1.15377	0.727	0.622	0	OPC	ZSWIM6
0	1.14989	0.778	0.33	0	OPC	PTPRT
0	1.14384	0.986	0.782	0	OPC	LRRTM4
0	1.13097	0.386	0.22	0	OPC	CST3
0	1.11858	0.429	0.227	0	OPC	AFAP1
0	1.11756	0.542	0.317	0	OPC	IL1RAP
0	1.11641	0.998	0.934	0	OPC	NLGN1
0	1.11183	0.28	0.039	0	OPC	CCND1
0	1.10724	0.829	0.483	0	OPC	SOX5
0	1.10701	0.444	0.249	0	OPC	IGSF21
0	1.10627	0.365	0.154	0	OPC	GALNT3
0	1.10594	0.512	0.17	0	OPC	KANK1
0	1.0912	0.274	0.106	0	OPC	VEGFA
0	1.08975	0.37	0.076	0	OPC	CDC14A
0	1.08613	0.502	0.365	0	OPC	ACAP3
0	1.07846	0.698	0.328	0	OPC	CHD7
0	1.07505	0.8	0.383	0	OPC	CDH13
0	1.06812	0.569	0.224	0	OPC	PLCE1
0	1.06695	0.981	0.849	0	OPC	NPAS3
0	1.06629	0.409	0.258	0	OPC	ANGEL1
0	1.06544	0.88	0.793	0	OPC	TNKS
0	1.05271	0.503	0.368	0	OPC	TBC1D14
0	1.05253	0.827	0.595	0	OPC	LRRTM3
0	1.04749	0.476	0.286	0	OPC	BLM
0	1.04693	0.255	0.034	0	OPC	NKD1
0	1.04576	0.437	0.247	0	OPC	LIMA1
0	1.04446	0.445	0.163	0	OPC	GPSM2
0	0.718524	0.168	0.012	0	OPC	OLIG2
0	4.41536	1	0.491	0	Oligodendrocyte	MBP
0	4.11549	0.954	0.429	0	Oligodendrocyte	PLP1
0	4.01558	0.985	0.264	0	Oligodendrocyte	RNF220
0	3.55845	0.806	0.13	0	Oligodendrocyte	MOBP
0	3.38369	0.907	0.107	0	Oligodendrocyte	C10orf90
0	3.37977	0.995	0.704	0	Oligodendrocyte	CTNNA3
0	3.27036	0.981	0.519	0	Oligodendrocyte	PIP4K2A
0	3.1251	0.877	0.108	0	Oligodendrocyte	MOG
0	3.08266	0.895	0.424	0	Oligodendrocyte	QDPR
0	3.03146	0.863	0.181	0	Oligodendrocyte	ENPP2
0	2.98887	0.749	0.09	0	Oligodendrocyte	OPALIN
0	2.98802	0.813	0.11	0	Oligodendrocyte	MAG
0	2.96393	0.981	0.541	0	Oligodendrocyte	TMTC2
0	2.89784	0.877	0.212	0	Oligodendrocyte	ST18
0	2.89357	0.989	0.598	0	Oligodendrocyte	ELMO1
0	2.7775	0.824	0.124	0	Oligodendrocyte	SHROOM4
0	2.75328	0.814	0.174	0	Oligodendrocyte	FOLH1
0	2.75282	0.937	0.604	0	Oligodendrocyte	PDE8A
0	2.74501	0.861	0.267	0	Oligodendrocyte	PLEKHH1
0	2.73963	0.98	0.739	0	Oligodendrocyte	SLC44A1
0	2.66439	0.901	0.345	0	Oligodendrocyte	GAB1
0	2.66305	0.785	0.3	0	Oligodendrocyte	KIF13B
0	2.65968	0.974	0.724	0	Oligodendrocyte	PHLPP1
0	2.65792	0.82	0.159	0	Oligodendrocyte	TTYH2
0	2.65427	0.778	0.114	0	Oligodendrocyte	FA2H
0	2.61744	0.761	0.122	0	Oligodendrocyte	DOCK5
0	2.58812	0.894	0.482	0	Oligodendrocyte	ARAP2
0	2.57482	0.663	0.073	0	Oligodendrocyte	ANLN
0	2.57015	0.778	0.18	0	Oligodendrocyte	CLMN
0	2.56701	0.689	0.182	0	Oligodendrocyte	HHIP
0	2.55322	0.782	0.223	0	Oligodendrocyte	CNTN2
0	2.54157	0.701	0.337	0	Oligodendrocyte	CLDN11
0	2.53639	0.723	0.143	0	Oligodendrocyte	UGT8
0	2.52097	0.755	0.205	0	Oligodendrocyte	TMC7
0	2.47704	0.743	0.203	0	Oligodendrocyte	CREB5
0	2.4676	0.742	0.12	0	Oligodendrocyte	ABCA8
0	2.46309	0.881	0.596	0	Oligodendrocyte	MSANTD3-TMEFF1
0	2.44967	0.914	0.624	0	Oligodendrocyte	SLAIN1
0	2.43869	0.978	0.735	0	Oligodendrocyte	PDE4B
0	2.40808	0.932	0.601	0	Oligodendrocyte	PLCL1
0	2.39671	0.971	0.79	0	Oligodendrocyte	SH3GL3
0	2.39507	0.606	0.209	0	Oligodendrocyte	SLC5A11
0	2.38502	0.683	0.119	0	Oligodendrocyte	PLLP
0	2.36614	0.897	0.593	0	Oligodendrocyte	FRYL
0	2.34949	0.629	0.111	0	Oligodendrocyte	ITGA2
0	2.32831	0.439	0.042	0	Oligodendrocyte	ERMN
0	2.31381	0.972	0.551	0	Oligodendrocyte	DOCK10
0	2.27025	0.645	0.119	0	Oligodendrocyte	TF
0	2.2561	0.661	0.119	0	Oligodendrocyte	COL4A5
0	2.22569	0.961	0.678	0	Oligodendrocyte	FNBP1
0	2.20456	0.8	0.25	0	Oligodendrocyte	FGFR2
0	2.19077	0.918	0.693	0	Oligodendrocyte	SHTN1
0	2.18071	0.989	0.818	0	Oligodendrocyte	FRMD5
0	2.17827	0.993	0.94	0	Oligodendrocyte	SIK3
0	2.16236	0.969	0.753	0	Oligodendrocyte	SLC24A2
0	2.137	0.865	0.545	0	Oligodendrocyte	ERBIN
0	2.13024	0.84	0.236	0	Oligodendrocyte	DAAM2
0	2.12998	0.944	0.617	0	Oligodendrocyte	SPOCK3
0	2.12197	0.8	0.455	0	Oligodendrocyte	SLC25A13
0	2.11017	0.588	0.151	0	Oligodendrocyte	KCNH8
0	2.09716	0.587	0.095	0	Oligodendrocyte	CLIC4
0	2.09704	0.676	0.22	0	Oligodendrocyte	TESK2
0	2.08738	0.785	0.608	0	Oligodendrocyte	ZDHHC20
0	2.07869	0.907	0.558	0	Oligodendrocyte	USP54
0	2.05498	0.36	0.099	0	Oligodendrocyte	CRYAB
0	2.04927	0.768	0.418	0	Oligodendrocyte	HIPK2
0	2.0468	0.724	0.15	0	Oligodendrocyte	BCAS1
0	2.04244	0.611	0.401	0	Oligodendrocyte	DPYSL5
0	2.04164	0.889	0.469	0	Oligodendrocyte	FRMD4B
0	2.04128	0.54	0.1	0	Oligodendrocyte	RASGRP3
0	2.04103	0.51	0.045	0	Oligodendrocyte	MAL
0	2.03914	0.847	0.633	0	Oligodendrocyte	CDK19
0	2.03714	0.885	0.733	0	Oligodendrocyte	FUT8
0	2.02846	0.546	0.041	0	Oligodendrocyte	MYRF
0	1.99978	0.735	0.534	0	Oligodendrocyte	MAN2A1
0	1.97908	0.703	0.219	0	Oligodendrocyte	PLD1
0	1.95724	0.877	0.71	0	Oligodendrocyte	TTLL7
0	1.94838	0.577	0.25	0	Oligodendrocyte	RFFL
0	1.93523	0.628	0.346	0	Oligodendrocyte	POLR2F
0	1.92013	0.493	0.091	0	Oligodendrocyte	TMEM144
0	1.9197	0.466	0.047	0	Oligodendrocyte	CPM
0	1.91916	0.335	0.068	0	Oligodendrocyte	CNP
0	1.91678	0.978	0.798	0	Oligodendrocyte	EDIL3
0	1.90882	0.822	0.432	0	Oligodendrocyte	COBL
0	1.90514	0.604	0.257	0	Oligodendrocyte	EPB41L4A
0	1.90505	0.578	0.212	0	Oligodendrocyte	NDRG1
0	1.90486	0.608	0.256	0	Oligodendrocyte	ARHGAP23
0	1.89731	0.509	0.1	0	Oligodendrocyte	LDB3
0	1.88436	0.476	0.212	0	Oligodendrocyte	CLDND1
0	1.88305	0.585	0.211	0	Oligodendrocyte	LPAR1
0	1.88094	0.611	0.505	0	Oligodendrocyte	PRUNE2
0	1.87521	0.937	0.701	0	Oligodendrocyte	GARNL3
0	1.82837	0.98	0.846	0	Oligodendrocyte	DNM3
0	1.80913	0.998	0.943	0	Oligodendrocyte	IL1RAPL1
0	1.8074	0.595	0.242	0	Oligodendrocyte	MTUS1
0	1.79587	0.417	0.398	0	Oligodendrocyte	DIP2B
0	1.79577	0.496	0.2	0	Oligodendrocyte	GPR37
0	1.79274	0.67	0.429	0	Oligodendrocyte	ATG4C
0	1.7766	0.44	0.129	0	Oligodendrocyte	SPP1
0	1.75214	0.517	0.089	0	Oligodendrocyte	PLEKHG3
0	1.75201	0.894	0.531	0	Oligodendrocyte	ST6GALNAC3
0	1.73281	0.957	0.861	0	Oligodendrocyte	TCF12
0	1.72584	0.498	0.127	0	Oligodendrocyte	FAM124A
0	1.72375	0.569	0.155	0	Oligodendrocyte	MYO1E
0	1.71867	0.495	0.102	0	Oligodendrocyte	PLEKHB1
0	1.71298	0.746	0.588	0	Oligodendrocyte	LPGAT1
0	1.71085	0.982	0.89	0	Oligodendrocyte	PTPRD
0	1.69149	0.954	0.862	0	Oligodendrocyte	RTN4
0	1.69098	0.741	0.551	0	Oligodendrocyte	PPP1R16B
0	1.68549	0.909	0.579	0	Oligodendrocyte	CDH20
0	1.68319	0.551	0.227	0	Oligodendrocyte	MITF
0	1.6831	0.682	0.583	0	Oligodendrocyte	SAMD5
0	1.68152	0.479	0.275	0	Oligodendrocyte	KLHL4
0	1.67545	0.533	0.259	0	Oligodendrocyte	TMTC4
0	1.6662	0.722	0.498	0	Oligodendrocyte	GRM3
0	1.66559	0.818	0.685	0	Oligodendrocyte	CDK8
0	1.66382	0.778	0.612	0	Oligodendrocyte	DENND5A
0	1.65571	0.719	0.279	0	Oligodendrocyte	DOCK1
0	1.65463	0.339	0.04	0	Oligodendrocyte	CNDP1
0	1.64849	0.517	0.107	0	Oligodendrocyte	CDH19
0	1.63219	0.982	0.867	0	Oligodendrocyte	ZEB2
0	1.62592	0.743	0.574	0	Oligodendrocyte	ZFYVE16
0	1.60911	0.984	0.951	0	Oligodendrocyte	PPP2R2B
0	1.60007	0.592	0.389	0	Oligodendrocyte	RYBP
0	1.59255	0.483	0.185	0	Oligodendrocyte	LRRC1
0	1.59032	0.812	0.69	0	Oligodendrocyte	OSBPL1A
0	1.58956	0.396	0.055	0	Oligodendrocyte	EFHD1
0	1.58314	0.999	0.98	0	Oligodendrocyte	MAGI2
0	1.58094	0.945	0.842	0	Oligodendrocyte	DLG1
0	1.58024	0.456	0.142	0	Oligodendrocyte	BNC2
0	1.57478	0.781	0.689	0	Oligodendrocyte	MAP4K5
0	1.56492	0.602	0.414	0	Oligodendrocyte	RIF1
0	1.56271	0.949	0.887	0	Oligodendrocyte	FMNL2
0	1.56214	0.498	0.297	0	Oligodendrocyte	KIF6
0	1.56166	0.428	0.177	0	Oligodendrocyte	SOX2
0	1.5466	0.756	0.609	0	Oligodendrocyte	MYO1D
0	1.54159	0.576	0.183	0	Oligodendrocyte	MEGF10
0	1.54122	0.946	0.849	0	Oligodendrocyte	WWOX
0	1.51748	0.313	0.132	0	Oligodendrocyte	GLUL
0	1.51434	0.6	0.424	0	Oligodendrocyte	PSEN1
0	1.5103	0.588	0.649	0	Oligodendrocyte	LARP4
0	1.50915	0.318	0.1	0	Oligodendrocyte	SYT9
0	1.50831	0.545	0.407	0	Oligodendrocyte	STMN4
0	1.50006	0.454	0.314	0	Oligodendrocyte	LAMP2
0	1.4985	0.382	0.04	0	Oligodendrocyte	SH3TC2
0	1.49734	0.622	0.465	0	Oligodendrocyte	REEP3
0	1.49308	0.636	0.498	0	Oligodendrocyte	PXK
0	1.48657	0.616	0.422	0	Oligodendrocyte	ELL2
0	1.48581	0.77	0.669	0	Oligodendrocyte	NAALADL2
0	1.48477	0.469	0.167	0	Oligodendrocyte	CYP27A1
0	5.27814	0.992	0.579	0	NSC/Astrocyte	SLC1A2
0	4.82767	0.999	0.435	0	NSC/Astrocyte	ADGRV1
0	3.95689	0.979	0.251	0	NSC/Astrocyte	SLC1A3
0	3.27547	0.844	0.487	0	NSC/Astrocyte	GPC5
0	3.23866	0.843	0.058	0	NSC/Astrocyte	GLI3
0	3.08477	0.795	0.063	0	NSC/Astrocyte	SLC25A18
0	3.06131	0.757	0.087	0	NSC/Astrocyte	RGS20
0	2.99619	0.896	0.339	0	NSC/Astrocyte	SPARCL1
0	2.98351	0.864	0.236	0	NSC/Astrocyte	PREX2
0	2.94731	0.992	0.721	0	NSC/Astrocyte	MSI2
0	2.88121	0.557	0.076	0	NSC/Astrocyte	GFAP
0	2.81107	0.915	0.397	0	NSC/Astrocyte	SLC4A4
0	2.76243	0.557	0.058	0	NSC/Astrocyte	ALDH1A1
0	2.75903	0.68	0.024	0	NSC/Astrocyte	ETNPPL
0	2.72486	0.976	0.658	0	NSC/Astrocyte	DTNA
0	2.71519	0.998	0.843	0	NSC/Astrocyte	GPM6A
0	2.71024	0.641	0.216	0	NSC/Astrocyte	APOE
0	2.69867	0.766	0.094	0	NSC/Astrocyte	GRAMD2B
0	2.67134	0.743	0.222	0	NSC/Astrocyte	NHSL1
0	2.66867	0.813	0.123	0	NSC/Astrocyte	ATP13A4
0	2.63135	0.637	0.074	0	NSC/Astrocyte	AQP4
0	2.61642	0.619	0.04	0	NSC/Astrocyte	ITGB4
0	2.58295	0.796	0.277	0	NSC/Astrocyte	RFX4
0	2.5419	0.998	0.807	0	NSC/Astrocyte	NTM
0	2.53942	0.777	0.315	0	NSC/Astrocyte	ZNRF3
0	2.5011	0.513	0.025	0	NSC/Astrocyte	TNC
0	2.44887	0.861	0.349	0	NSC/Astrocyte	CDH4
0	2.4051	0.911	0.582	0	NSC/Astrocyte	OPHN1
0	2.40199	0.894	0.535	0	NSC/Astrocyte	CARMIL1
0	2.37665	0.799	0.263	0	NSC/Astrocyte	LRIG1
0	2.35658	0.992	0.88	0	NSC/Astrocyte	TNIK
0	2.35658	0.792	0.189	0	NSC/Astrocyte	PLCE1
0	2.35373	0.792	0.22	0	NSC/Astrocyte	FGFR1
0	2.33509	0.633	0.122	0	NSC/Astrocyte	ANGPT1
0	2.33095	0.838	0.381	0	NSC/Astrocyte	SFXN5
0	2.32236	0.826	0.444	0	NSC/Astrocyte	MMD2
0	2.28783	0.995	0.652	0	NSC/Astrocyte	NKAIN3
0	2.27457	0.991	0.844	0	NSC/Astrocyte	NPAS3
0	2.22647	0.685	0.123	0	NSC/Astrocyte	SLC15A2
0	2.22491	0.936	0.679	0	NSC/Astrocyte	CPE
0	2.20777	0.6	0.076	0	NSC/Astrocyte	TCF7L1
0	2.20204	0.73	0.291	0	NSC/Astrocyte	EPHB1
0	2.20082	0.835	0.644	0	NSC/Astrocyte	NTRK2
0	2.19733	0.545	0.016	0	NSC/Astrocyte	ACSBG1
0	2.17513	0.773	0.393	0	NSC/Astrocyte	PDZRN4
0	2.17265	0.813	0.461	0	NSC/Astrocyte	ZHX3
0	2.17214	0.897	0.55	0	NSC/Astrocyte	ABLIM1
0	2.16366	0.739	0.272	0	NSC/Astrocyte	TPCN1
0	2.12995	0.856	0.532	0	NSC/Astrocyte	GABBR1
0	2.11081	0.555	0.11	0	NSC/Astrocyte	PAMR1
0	2.09479	0.723	0.444	0	NSC/Astrocyte	CLU
0	2.07998	0.411	0.102	0	NSC/Astrocyte	WIF1
0	2.06648	0.554	0.04	0	NSC/Astrocyte	MFGE8
0	2.05696	0.953	0.681	0	NSC/Astrocyte	SORBS1
0	2.04769	0.528	0.03	0	NSC/Astrocyte	LAMA1
0	2.03203	0.5	0.076	0	NSC/Astrocyte	BMPR1B
0	2.02675	0.74	0.354	0	NSC/Astrocyte	ANTXR1
0	2.02164	0.894	0.693	0	NSC/Astrocyte	ASB3
0	2.01802	0.985	0.719	0	NSC/Astrocyte	PRKG1
0	2.00666	0.487	0.064	0	NSC/Astrocyte	EFEMP1
0	1.98413	0.523	0.032	0	NSC/Astrocyte	MRVI1
0	1.97403	0.604	0.142	0	NSC/Astrocyte	FGD6
0	1.90513	0.63	0.227	0	NSC/Astrocyte	FADS2
0	1.89668	0.537	0.097	0	NSC/Astrocyte	GRAMD1C
0	1.87933	0.799	0.465	0	NSC/Astrocyte	CAMK2G
0	1.85185	0.529	0.177	0	NSC/Astrocyte	PHKA1
0	1.84628	0.538	0.174	0	NSC/Astrocyte	FAM107A
0	1.83392	0.815	0.465	0	NSC/Astrocyte	FARP1
0	1.83341	0.57	0.182	0	NSC/Astrocyte	TIMP3
0	1.82175	0.516	0.068	0	NSC/Astrocyte	ARHGEF26
0	1.81032	0.899	0.566	0	NSC/Astrocyte	SASH1
0	1.81026	0.557	0.252	0	NSC/Astrocyte	ANOS1
0	1.80863	0.741	0.417	0	NSC/Astrocyte	FGD4
0	1.80851	0.598	0.222	0	NSC/Astrocyte	STON2
0	1.80084	0.439	0.064	0	NSC/Astrocyte	COL5A3
0	1.79715	0.728	0.266	0	NSC/Astrocyte	ZFHX4
0	1.78985	0.508	0.064	0	NSC/Astrocyte	NDRG2
0	1.78985	0.662	0.45	0	NSC/Astrocyte	LUZP2
0	1.77444	0.749	0.344	0	NSC/Astrocyte	LHFPL6
0	1.76045	0.969	0.751	0	NSC/Astrocyte	NFIA
0	1.75655	0.551	0.104	0	NSC/Astrocyte	RORB
0	1.75504	0.465	0.046	0	NSC/Astrocyte	MYBPC1
0	1.75024	0.728	0.392	0	NSC/Astrocyte	TTYH1
0	1.74299	0.75	0.379	0	NSC/Astrocyte	PCSK5
0	1.739	0.406	0.057	0	NSC/Astrocyte	SNTB1
0	1.72885	0.366	0.013	0	NSC/Astrocyte	FGFR3
0	1.72725	0.764	0.35	0	NSC/Astrocyte	TCF7L2
0	1.72009	0.45	0.019	0	NSC/Astrocyte	MLC1
0	1.71953	0.615	0.329	0	NSC/Astrocyte	OLFM2
0	1.71887	0.847	0.402	0	NSC/Astrocyte	FBXL7
0	1.7182	0.472	0.077	0	NSC/Astrocyte	COL5A1
0	1.71255	0.702	0.21	0	NSC/Astrocyte	ACACB
0	1.71239	0.56	0.104	0	NSC/Astrocyte	BCAN
0	1.70873	0.866	0.818	0	NSC/Astrocyte	DPP10
0	1.70732	0.556	0.167	0	NSC/Astrocyte	PLEKHA7
0	1.69809	0.409	0.162	0	NSC/Astrocyte	ALPK3
0	1.6801	0.344	0.014	0	NSC/Astrocyte	PRDM16
0	1.66505	0.563	0.238	0	NSC/Astrocyte	ARHGEF10L
0	1.65056	0.644	0.253	0	NSC/Astrocyte	LIFR
0	1.64196	0.856	0.468	0	NSC/Astrocyte	SOX5
0	1.63706	0.482	0.079	0	NSC/Astrocyte	ARHGAP31
0	1.63352	0.471	0.157	0	NSC/Astrocyte	HOPX
0	1.63349	0.557	0.299	0	NSC/Astrocyte	NRP2
0	1.62867	0.902	0.561	0	NSC/Astrocyte	TRPS1
0	1.62157	0.439	0.083	0	NSC/Astrocyte	RGCC
0	1.61565	0.579	0.152	0	NSC/Astrocyte	KANK1
0	1.61411	0.581	0.146	0	NSC/Astrocyte	PDLIM5
0	1.61107	0.572	0.307	0	NSC/Astrocyte	CHPT1
0	1.60739	0.654	0.284	0	NSC/Astrocyte	CRB1
0	1.60404	0.994	0.887	0	NSC/Astrocyte	CTNND2
0	1.60373	0.476	0.087	0	NSC/Astrocyte	BMP7
0	1.60055	0.343	0.026	0	NSC/Astrocyte	ACBD7
0	1.599	0.517	0.241	0	NSC/Astrocyte	SORCS2
0	1.59281	0.459	0.062	0	NSC/Astrocyte	ACSS1
0	1.59204	0.859	0.422	0	NSC/Astrocyte	GPC6
0	1.58397	0.457	0.079	0	NSC/Astrocyte	SLC7A11
0	1.5821	0.601	0.339	0	NSC/Astrocyte	SNTA1
0	1.57581	0.535	0.093	0	NSC/Astrocyte	MERTK
0	1.57073	0.444	0.109	0	NSC/Astrocyte	TPD52L1
0	1.56939	0.401	0.19	0	NSC/Astrocyte	SHROOM3
0	1.56868	0.408	0.055	0	NSC/Astrocyte	FAM189A2
0	1.56257	0.712	0.464	0	NSC/Astrocyte	RORA
0	1.55061	0.491	0.193	0	NSC/Astrocyte	BBS2
0	1.54957	0.706	0.392	0	NSC/Astrocyte	LPP
0	1.54955	0.644	0.395	0	NSC/Astrocyte	L3MBTL4
0	1.54937	0.628	0.397	0	NSC/Astrocyte	AHCYL1
0	1.54838	0.753	0.568	0	NSC/Astrocyte	RALGAPA2
0	1.54795	0.716	0.358	0	NSC/Astrocyte	FOXO1
0	1.54224	0.397	0.066	0	NSC/Astrocyte	BOC
0	1.54043	0.482	0.151	0	NSC/Astrocyte	PHF21B
0	1.52767	0.35	0.037	0	NSC/Astrocyte	SLCO1C1
0	1.52443	0.368	0.216	0	NSC/Astrocyte	CST3
0	1.52392	0.49	0.2	0	NSC/Astrocyte	CNTFR
0	1.51563	0.5	0.212	0	NSC/Astrocyte	SDC2
0	1.51024	0.364	0.019	0	NSC/Astrocyte	BBOX1
0	1.50637	0.376	0.078	0	NSC/Astrocyte	LGI4
0	1.49283	0.761	0.555	0	NSC/Astrocyte	ACSL6
0	1.48126	0.56	0.227	0	NSC/Astrocyte	SPON1
0	1.47592	0.415	0.13	0	NSC/Astrocyte	GABRG1
0	1.47399	0.465	0.146	0	NSC/Astrocyte	NOTCH2
0	1.47261	0.975	0.892	0	NSC/Astrocyte	MACF1
0	1.4692	0.685	0.485	0	NSC/Astrocyte	PALM
0	1.4626	0.355	0.01	0	NSC/Astrocyte	SDC4
0	1.46233	0.353	0.019	0	NSC/Astrocyte	EDNRB
0	1.45928	0.457	0.218	0	NSC/Astrocyte	MAPK4
0	1.45329	0.581	0.368	0	NSC/Astrocyte	WWC1
0	1.44806	0.573	0.295	0	NSC/Astrocyte	CTNNA1
0	1.43603	0.436	0.16	0	NSC/Astrocyte	RAI14
0	1.42718	0.323	0.015	0	NSC/Astrocyte	AGT
0	1.42664	0.306	0.052	0	NSC/Astrocyte	LMNTD1
0	3.59078	0.628	0.536	0	GABAergic	ADARB2
0	3.37714	0.923	0.365	0	GABAergic	GRIK1
0	2.91875	0.72	0.2	0	GABAergic	NXPH1
0	2.89108	0.875	0.474	0	GABAergic	GALNTL6
0	2.80764	0.988	0.534	0	GABAergic	KCNC2
0	2.79487	0.968	0.784	0	GABAergic	ERBB4
0	2.49984	0.719	0.146	0	GABAergic	PTCHD4
0	2.4698	0.893	0.172	0	GABAergic	RBMS3
0	2.43378	0.828	0.039	0	GABAergic	GAD2
0	2.38643	0.91	0.086	0	GABAergic	NHS
0	2.30158	0.799	0.35	0	GABAergic	PTPRM
0	2.26867	0.675	0.038	0	GABAergic	BTBD11
0	2.2384	0.811	0.344	0	GABAergic	GRIA4
0	2.20996	0.907	0.135	0	GABAergic	GAD1
0	2.17943	0.891	0.203	0	GABAergic	UBASH3B
0	2.13018	0.752	0.372	0	GABAergic	CDH13
0	1.96284	1	0.845	0	GABAergic	CNTNAP2
0	1.94893	0.524	0.342	0	GABAergic	RELN
0	1.93786	0.595	0.18	0	GABAergic	GRIN3A
0	1.90141	0.516	0.204	0	GABAergic	CNR1
0	1.86808	0.897	0.68	0	GABAergic	SGCZ
0	1.83687	0.651	0.411	0	GABAergic	FGF13
0	1.8365	0.732	0.401	0	GABAergic	FSTL5
0	1.81512	0.953	0.497	0	GABAergic	RPS6KA2
0	1.81409	0.957	0.538	0	GABAergic	GRIP1
0	1.79951	0.907	0.4	0	GABAergic	NETO2
0	1.79918	0.678	0.174	0	GABAergic	PLD5
0	1.74736	0.989	0.648	0	GABAergic	XKR4
0	1.71131	0.858	0.312	0	GABAergic	KCTD8
0	1.70024	0.746	0.093	0	GABAergic	ANK1
0	1.67968	0.861	0.533	0	GABAergic	TENM3
0	1.66865	0.9	0.679	0	GABAergic	GRID2
0	1.64505	0.697	0.335	0	GABAergic	ALK
0	1.63195	0.461	0.114	0	GABAergic	PDE3A
0	1.62851	0.695	0.316	0	GABAergic	KIAA1217
0	1.61031	0.999	0.861	0	GABAergic	GRIK2
0	1.60067	0.711	0.311	0	GABAergic	RGS12
0	1.56521	0.712	0.164	0	GABAergic	KCNIP1
0	1.55813	0.673	0.138	0	GABAergic	VWC2
0	1.53001	0.994	0.854	0	GABAergic	NRXN3
0	1.5232	0.905	0.528	0	GABAergic	CNTN5
0	1.50562	0.909	0.43	0	GABAergic	RAB3C
0	1.50234	0.911	0.467	0	GABAergic	ANO4
0	1.48645	0.829	0.641	0	GABAergic	UNC5D
0	1.48338	0.816	0.187	0	GABAergic	SLC6A1
0	1.46319	0.757	0.27	0	GABAergic	ELAVL2
0	1.4613	0.988	0.769	0	GABAergic	KAZN
0	1.45448	0.772	0.248	0	GABAergic	RPH3A
0	1.45312	0.651	0.037	0	GABAergic	GRIP2
0	1.43963	0.239	0.071	0	GABAergic	SST
0	1.43884	0.634	0.126	0	GABAergic	OSBPL3
0	1.42142	0.476	0.253	0	GABAergic	IL1RAPL2
0	1.39877	0.949	0.603	0	GABAergic	MYRIP
0	1.39288	0.836	0.435	0	GABAergic	PEG3
0	1.39231	0.998	0.803	0	GABAergic	FGF12
0	1.37952	0.574	0.334	0	GABAergic	PTPRT
0	1.37366	0.613	0.074	0	GABAergic	IGF1
0	1.37247	0.512	0.141	0	GABAergic	GALNT14
0	1.36558	0.819	0.329	0	GABAergic	KIAA1211
0	1.34786	0.546	0.214	0	GABAergic	PLCXD3
0	1.33177	0.532	0.281	0	GABAergic	EYS
0	1.32369	0.687	0.333	0	GABAergic	TMEM132D
0	1.32028	0.513	0.249	0	GABAergic	SDK1
0	1.31813	0.665	0.45	0	GABAergic	RASGRF2
0	1.26939	0.238	0.099	0	GABAergic	EYA4
0	1.2678	0.826	0.407	0	GABAergic	CNTN4
0	1.26463	0.376	0.121	0	GABAergic	STK32B
0	1.25224	0.714	0.442	0	GABAergic	ZMAT4
0	1.24124	0.929	0.76	0	GABAergic	OXR1
0	1.23446	0.508	0.269	0	GABAergic	GRM8
0	1.19636	0.442	0.009	0	GABAergic	LHX6
0	1.18536	0.999	0.828	0	GABAergic	FGF14
0	1.18419	0.393	0.049	0	GABAergic	BMP6
0	1.17499	0.732	0.243	0	GABAergic	SLC8A3
0	1.16743	0.514	0.188	0	GABAergic	EGFR
0	1.16162	0.798	0.475	0	GABAergic	GABRG3
0	1.16107	0.68	0.173	0	GABAergic	VAV2
0	1.15851	0.623	0.424	0	GABAergic	FBXL7
0	1.15462	0.642	0.176	0	GABAergic	VSTM2A
0	1.1502	0.917	0.503	0	GABAergic	THRB
0	1.14401	0.772	0.347	0	GABAergic	SYN3
0	1.14319	0.793	0.364	0	GABAergic	CIT
0	1.13442	0.9	0.717	0	GABAergic	ASIC2
0	1.13203	0.906	0.543	0	GABAergic	RIMBP2
0	1.13092	0.936	0.598	0	GABAergic	GABRB2
0	1.12861	0.731	0.339	0	GABAergic	ADCY8
0	1.12593	0.485	0.282	0	GABAergic	TRHDE
0	1.11462	0.605	0.077	0	GABAergic	ANKRD55
0	1.1095	0.559	0.212	0	GABAergic	TMEM132C
0	1.10566	0.355	0.089	0	GABAergic	FBN2
0	1.09867	0.787	0.462	0	GABAergic	MTUS2
0	1.09154	0.878	0.58	0	GABAergic	CNTNAP5
0	1.09004	0.863	0.554	0	GABAergic	GNAS
0	1.08971	0.623	0.237	0	GABAergic	PIP5K1B
0	1.08885	0.569	0.287	0	GABAergic	FRAS1
0	1.07235	0.32	0.069	0	GABAergic	NOS1
0	1.07139	0.654	0.24	0	GABAergic	FMN1
0	1.06604	0.824	0.541	0	GABAergic	C8orf34
0	1.06347	0.977	0.649	0	GABAergic	ATP8A2
0	1.06296	0.936	0.765	0	GABAergic	ROBO1
0	1.06223	0.683	0.254	0	GABAergic	PDZRN3
0	1.06158	0.43	0.07	0	GABAergic	TOX3
0	1.04384	0.679	0.298	0	GABAergic	METAP1D
0	1.03259	0.511	0.208	0	GABAergic	SLC35F4
0	1.03223	0.239	0.055	0	GABAergic	SV2C
0	1.02769	0.932	0.623	0	GABAergic	ARNT2
0	1.02214	0.986	0.628	0	GABAergic	TMEM178B
0	1.01846	0.809	0.499	0	GABAergic	SYNPR
3.52732e-306	1.01277	0.609	0.473	4.82467e-302	GABAergic	THSD7A
0	1.00454	0.771	0.49	0	GABAergic	KCNAB1
0	1.00429	0.976	0.661	0	GABAergic	SPOCK3
0	0.998625	0.991	0.839	0	GABAergic	PDE4D
0	0.99768	0.585	0.177	0	GABAergic	2021-03-11
0	0.987481	0.916	0.548	0	GABAergic	MEF2C
0	0.986245	0.596	0.23	0	GABAergic	LRP8
0	0.972984	0.801	0.434	0	GABAergic	CLVS1
0	0.963893	0.37	0.116	0	GABAergic	PDE1C
0	0.958131	0.51	0.146	0	GABAergic	WLS
0	0.948074	0.823	0.431	0	GABAergic	SRRM4
0	0.940252	0.465	0.08	0	GABAergic	SIAH3
0	0.937517	0.791	0.44	0	GABAergic	2021-03-04
0	0.93658	0.551	0.21	0	GABAergic	FXYD6
0	0.930897	0.643	0.25	0	GABAergic	NRSN1
0	0.927497	0.741	0.441	0	GABAergic	LUZP2
0	0.923354	0.449	0.135	0	GABAergic	ST8SIA4
0	0.912743	0.394	0.102	0	GABAergic	ADAMTS6
0	0.910504	0.636	0.386	0	GABAergic	INPP4B
0	0.90779	0.685	0.366	0	GABAergic	GABRA1
0	0.907478	0.605	0.246	0	GABAergic	FRMD3
0	0.907407	0.843	0.543	0	GABAergic	ADCY2
0	0.902477	0.617	0.2	0	GABAergic	AFAP1
0	0.902052	0.964	0.786	0	GABAergic	DPP6
0	0.900706	0.879	0.572	0	GABAergic	ASTN2
0	0.895651	0.299	0.067	0	GABAergic	NXPH2
0	0.894513	0.856	0.522	0	GABAergic	PAM
0	0.892489	0.261	0.134	0	GABAergic	ADAMTSL1
0	0.891645	0.655	0.418	0	GABAergic	TENM1
0	0.891082	0.762	0.512	0	GABAergic	KIF26B
0	0.868029	0.941	0.811	0	GABAergic	DPP10
0	0.863178	0.64	0.21	0	GABAergic	RANBP17
0	0.855956	0.815	0.503	0	GABAergic	NYAP2
0	0.854395	0.509	0.258	0	GABAergic	CNTN6
0	0.849774	0.518	0.183	0	GABAergic	PRMT8
0	0.849549	0.618	0.254	0	GABAergic	ST8SIA5
0	0.846461	0.573	0.218	0	GABAergic	RBMS1
0	0.845129	0.698	0.389	0	GABAergic	L3MBTL4
0	0.838405	0.659	0.35	0	GABAergic	DGKD
0	0.835785	0.914	0.701	0	GABAergic	TMEM132B
0	0.824306	0.548	0.136	0	GABAergic	NTN4
0	0.823813	0.972	0.59	0	GABAergic	CACNA1B
0	2.8257	0.678	0.14	0	NN	SEMA3C
0	2.08907	0.714	0.329	0	NN	KCNH7
0	2.06295	0.864	0.483	0	NN	COL25A1
0	1.93644	0.595	0.242	0	NN	NNAT
0	1.90461	0.731	0.387	0	NN	ABLIM3
0	1.9036	0.945	0.667	0	NN	ZFPM2
0	1.84815	0.613	0.214	0	NN	PROX1
3.00017e-275	1.80887	0.418	0.137	4.10363e-271	NN	PDE1C
0	1.71111	0.887	0.662	0	NN	NFIB
0	1.68624	0.841	0.508	0	NN	SLIT3
0	1.66061	0.946	0.778	0	NN	TTC28
2.27969e-271	1.61733	0.711	0.431	3.11815e-267	NN	FGF13
8.22368e-232	1.56079	0.584	0.31	1.12483e-227	NN	ZBTB18
5.18837e-192	1.55034	0.687	0.492	7.09665e-188	NN	PLXNA2
4.69757e-277	1.48984	0.863	0.716	6.42533e-273	NN	CDH2
4.52892e-207	1.48142	0.522	0.268	6.19466e-203	NN	NREP
1.2327e-243	1.45309	0.652	0.335	1.68608e-239	NN	SETBP1
2.30882e-134	1.43009	0.46	0.262	3.158e-130	NN	LRP8
4.7851e-145	1.40714	0.636	0.45	6.54506e-141	NN	NRP1
8.53801e-275	1.38587	0.414	0.134	1.16783e-270	NN	TUBB2B
1.56688e-167	1.38434	0.366	0.149	2.14318e-163	NN	SEMA3A
1.64696e-165	1.36951	0.54	0.309	2.25272e-161	NN	TUBB
0	1.36868	0.967	0.68	0	NN	NKAIN3
1.36601e-167	1.35838	0.738	0.569	1.86843e-163	NN	2021-03-01
1.8293e-197	1.33936	0.659	0.416	2.50212e-193	NN	ACTG1
7.20743e-168	1.32486	0.388	0.166	9.85833e-164	NN	DPYSL3
6.4111e-255	1.31276	0.331	0.094	8.7691e-251	NN	ST8SIA2
4.67652e-135	1.31061	0.75	0.681	6.39654e-131	NN	DPYD
9.23402e-237	1.29769	0.75	0.439	1.26303e-232	NN	FBXL7
0	1.2907	0.9	0.716	0	NN	CACNA2D1
7.77591e-268	1.27769	0.596	0.247	1.06359e-263	NN	ND4
1.94658e-173	1.25287	0.685	0.501	2.66254e-169	NN	FNBP1L
1.83586e-72	1.25174	0.408	0.276	2.51109e-68	NN	VRK1
1.77843e-93	1.24658	0.433	0.271	2.43254e-89	NN	GLRA2
1.50201e-109	1.23165	0.638	0.548	2.05444e-105	NN	EPHA7
7.83876e-117	1.23154	0.394	0.208	1.07219e-112	NN	GNG2
0	1.20127	0.98	0.874	0	NN	CCSER1
5.15526e-128	1.19823	0.634	0.463	7.05137e-124	NN	IGF1R
8.19391e-70	1.19721	0.818	0.719	1.12076e-65	NN	NRG1
2.05798e-112	1.19178	0.572	0.419	2.8149e-108	NN	CCNH
2.70334e-110	1.19006	0.57	0.414	3.69764e-106	NN	ASXL3
3.08569e-139	1.18667	0.546	0.33	4.2206e-135	NN	FAT4
4.3365e-165	1.18417	0.616	0.376	5.93147e-161	NN	STMN1
9.86033e-97	1.17684	0.548	0.411	1.3487e-92	NN	CTNNB1
1.12731e-165	1.16411	0.64	0.41	1.54193e-161	NN	PCSK5
3.5851e-294	1.1583	0.869	0.601	4.9037e-290	NN	PTPRZ1
2.31909e-178	1.15698	0.729	0.517	3.17206e-174	NN	CCDC85A
5.72102e-109	1.15478	0.353	0.176	7.82521e-105	NN	SEMA5B
9.84991e-208	1.13251	0.946	0.822	1.34727e-203	NN	TENM2
4.75446e-270	1.12788	0.801	0.443	6.50315e-266	NN	COX3
3.52935e-83	1.12582	0.492	0.35	4.82744e-79	NN	PALLD
7.18327e-174	1.1254	0.574	0.32	9.82528e-170	NN	NRP2
2.4685e-236	1.12081	0.697	0.354	3.37641e-232	NN	COX2
8.81622e-80	1.1174	0.394	0.245	1.20588e-75	NN	NR2F1
0	1.11101	0.991	0.928	0	NN	DCC
5.91641e-143	1.10088	0.668	0.525	8.09247e-139	NN	ELMOD1
3.83814e-123	1.09569	0.506	0.287	5.24981e-119	NN	GAPDH
1.68156e-302	1.08719	0.938	0.792	2.30003e-298	NN	MAP2
9.28859e-65	1.08642	0.334	0.202	1.27049e-60	NN	CBFA2T2
3.31179e-143	1.08387	0.855	0.743	4.52987e-139	NN	DGKB
5.06056e-112	1.08188	0.225	0.079	6.92183e-108	NN	GLIS1
9.75383e-145	1.07724	0.747	0.614	1.33413e-140	NN	CHL1
1.03429e-126	1.07041	0.708	0.56	1.4147e-122	NN	KLF12
2.63819e-143	1.05047	0.422	0.193	3.60852e-139	NN	ATP6
4.28634e-77	1.04782	0.355	0.205	5.86286e-73	NN	RPL4
4.60357e-91	1.04612	0.237	0.099	6.29677e-87	NN	MDGA1
3.72712e-244	1.04592	0.865	0.628	5.09795e-240	NN	ZBTB20
1.98841e-111	1.039	0.608	0.462	2.71975e-107	NN	NSG2
1.77908e-75	1.03681	0.414	0.263	2.43343e-71	NN	RPL15
3.47966e-180	1.02332	0.271	0.081	4.75947e-176	NN	LYPD6
5.94977e-103	1.01585	0.401	0.216	8.13809e-99	NN	C14orf132
3.04172e-151	1.01472	0.715	0.54	4.16047e-147	NN	NECAB1
1.98501e-78	1.00801	0.549	0.416	2.71509e-74	NN	SERINC1
4.06701e-158	1.00711	0.772	0.709	5.56285e-154	NN	RASA1
8.36873e-75	0.996996	0.615	0.511	1.14467e-70	NN	GALNTL6
6.99057e-91	0.991271	0.559	0.402	9.5617e-87	NN	ADAMTS3
5.05487e-78	0.991088	0.648	0.603	6.91405e-74	NN	CNOT2
7.37428e-298	0.99002	0.984	0.961	1.00865e-293	NN	TCF4
8.90424e-171	0.989459	0.889	0.769	1.21792e-166	NN	NFIA
2.05131e-113	0.983393	0.709	0.648	2.80578e-109	NN	2021-03-06
2.92748e-110	0.979068	0.579	0.383	4.0042e-106	NN	RBM26
8.24029e-75	0.978564	0.465	0.307	1.12711e-70	NN	UBB
1.2851e-85	0.973718	0.657	0.556	1.75776e-81	NN	CDH10
3.69571e-232	0.97015	0.917	0.741	5.05499e-228	NN	PRKG1
8.04216e-102	0.969137	0.282	0.124	1.10001e-97	NN	ISLR2
1.03711e-247	0.965986	0.242	0.052	1.41856e-243	NN	SMO
5.76954e-168	0.964619	0.814	0.561	7.89158e-164	NN	FRMD4B
3.31458e-179	0.96222	0.814	0.609	4.53369e-175	NN	NELL1
1.6885e-45	0.945815	0.295	0.189	2.30953e-41	NN	RPL10
1.99296e-148	0.944174	0.573	0.311	2.72597e-144	NN	ND1
8.08848e-116	0.936479	0.209	0.068	1.10634e-111	NN	EZR
1.1067e-63	0.932344	0.272	0.141	1.51374e-59	NN	ANTXR2
1.19032e-49	0.923884	0.378	0.265	1.62812e-45	NN	DCX
2.59847e-41	0.923359	0.452	0.386	3.55419e-37	NN	RIC3
3.5425e-83	0.917616	0.482	0.312	4.84543e-79	NN	ACTB
1.99294e-42	0.915501	0.301	0.199	2.72595e-38	NN	KITLG
1.16354e-78	0.914459	0.624	0.549	1.5915e-74	NN	ENOX1
3.7924e-91	0.91417	0.315	0.146	5.18725e-87	NN	TLL1
2.2051e-86	0.913936	0.451	0.27	3.01614e-82	NN	FGFR1
1.41308e-110	0.911838	0.577	0.371	1.93282e-106	NN	UBC
1.85377e-46	0.910961	0.411	0.309	2.53558e-42	NN	LY6H
2.66961e-64	0.910663	0.199	0.088	3.65149e-60	NN	AADAT
9.22527e-43	0.909351	0.462	0.394	1.26183e-38	NN	CBLB
2.80005e-94	0.908824	0.697	0.582	3.8299e-90	NN	GNAS
2.78514e-68	0.905877	0.504	0.374	3.80951e-64	NN	KIAA1211
1.64504e-38	0.901087	0.264	0.168	2.25008e-34	NN	ARRDC3
6.5879e-104	0.900165	0.726	0.585	9.01093e-100	NN	CALM2
6.48809e-54	0.899424	0.529	0.449	8.8744e-50	NN	PUM2
1.3458e-64	0.898558	0.439	0.296	1.84079e-60	NN	ND2
3.08684e-126	0.892044	0.678	0.484	4.22218e-122	NN	THSD7A
9.22833e-65	0.884021	0.334	0.19	1.26225e-60	NN	PCP4
1.50677e-103	0.881197	0.684	0.552	2.06096e-99	NN	PTPRO
2.08007e-72	0.871213	0.63	0.595	2.84512e-68	NN	EML5
7.89627e-28	0.868976	0.373	0.313	1.08005e-23	NN	RPL22
2.27553e-130	0.868182	0.665	0.448	3.11247e-126	NN	PCDH15
7.91747e-130	0.857722	0.253	0.087	1.08295e-125	NN	NTF3
6.23974e-151	0.856981	0.624	0.364	8.53471e-147	NN	CYTB
4.59381e-69	0.855495	0.665	0.614	6.28341e-65	NN	PCDHAC2
1.45557e-52	0.852458	0.518	0.413	1.99093e-48	NN	YWHAH
1.93971e-118	0.852335	0.487	0.267	2.65314e-114	NN	NHSL1
4.30464e-72	0.849718	0.705	0.658	5.88789e-68	NN	SYT14
7.74299e-145	0.846676	0.797	0.703	1.05909e-140	NN	RFX3
9.91031e-179	0.840469	0.882	0.734	1.35553e-174	NN	NTRK3
1.90341e-272	0.839823	0.195	0.033	2.60348e-268	NN	PROKR2
6.36915e-45	0.83887	0.561	0.527	8.71173e-41	NN	UBE2E3
9.63659e-104	0.836545	0.764	0.732	1.31809e-99	NN	PHF14
4.908e-86	0.831426	0.238	0.099	6.71317e-82	NN	GCNT2
8.12959e-182	0.828122	0.896	0.653	1.11197e-177	NN	CLSTN2
3.38945e-57	0.822506	0.516	0.384	4.63609e-53	NN	TEAD1
6.48046e-112	0.819142	0.694	0.484	8.86398e-108	NN	MYO16
2.50401e-114	0.817887	0.775	0.648	3.42499e-110	NN	DOK6
3.1428e-63	0.817341	0.471	0.329	4.29872e-59	NN	EPHB1
5.71567e-41	0.811757	0.325	0.218	7.8179e-37	NN	ND3
1.12381e-37	0.811004	0.293	0.197	1.53714e-33	NN	HNRNPH3
6.90132e-31	0.809915	0.395	0.323	9.43963e-27	NN	C4orf45
4.50717e-110	0.807844	0.863	0.819	6.16491e-106	NN	MLLT3
3.7115e-43	0.802559	0.423	0.318	5.07659e-39	NN	ACACA
8.45641e-55	0.800831	0.594	0.529	1.15667e-50	NN	SCN3A
3.75785e-46	0.800262	0.451	0.346	5.13999e-42	NN	PPIA
7.87866e-47	0.799352	0.517	0.456	1.07764e-42	NN	SLC1A1
2.70188e-71	0.798198	0.67	0.582	3.69563e-67	NN	SEMA5A
3.39017e-22	0.794797	0.266	0.197	4.63708e-18	NN	RPS15
9.39138e-44	0.794213	0.54	0.495	1.28455e-39	NN	XPR1
1.16719e-48	0.791296	0.565	0.497	1.59648e-44	NN	UCHL1
4.12145e-21	0.787852	0.287	0.223	5.63732e-17	NN	TMEM131L
7.44377e-107	0.783357	0.727	0.59	1.01816e-102	NN	KCNJ6
1.00796e-37	0.781285	0.504	0.431	1.37868e-33	NN	YWHAB
1.00089e-87	0.778819	0.188	0.068	1.36902e-83	NN	SLCO5A1
2.56772e-42	0.777443	0.594	0.566	3.51213e-38	NN	SPIN1
1.39839e-30	0.775669	0.256	0.167	1.91272e-26	NN	PLCH1
0	2.47811	0.989	0.423	0	Granule cell	CCDC85A
0	2.42328	1	0.792	0	Granule cell	PPFIA2
0	2.24817	0.864	0.195	0	Granule cell	ROR1
0	2.0006	0.995	0.563	0	Granule cell	CDH8
0	1.89663	0.956	0.42	0	Granule cell	SLIT3
0	1.87835	0.984	0.386	0	Granule cell	COL25A1
0	1.82647	0.98	0.648	0	Granule cell	RFX3
0	1.81612	0.98	0.511	0	Granule cell	TIAM1
0	1.72611	0.971	0.419	0	Granule cell	SPHKAP
0	1.70194	0.988	0.476	0	Granule cell	CNTN5
0	1.69817	0.981	0.504	0	Granule cell	GRM1
0	1.69746	0.99	0.514	0	Granule cell	PLXNA4
0	1.68894	1	0.73	0	Granule cell	RYR2
0	1.6791	0.996	0.604	0	Granule cell	ZFPM2
0	1.65853	0.996	0.604	0	Granule cell	ST6GALNAC5
0	1.64237	0.997	0.552	0	Granule cell	TRPM3
0	1.60066	0.941	0.444	0	Granule cell	SYNPR
0	1.58787	0.997	0.725	0	Granule cell	PARD3
0	1.58202	0.952	0.467	0	Granule cell	EPHA7
0	1.57057	0.982	0.512	0	Granule cell	KCNJ6
0	1.55003	0.996	0.634	0	Granule cell	GABRB3
0	1.5457	0.995	0.649	0	Granule cell	DAB1
0	1.52014	1	0.832	0	Granule cell	STXBP5L
0	1.50342	0.977	0.534	0	Granule cell	DAPK1
0	1.50024	0.981	0.536	0	Granule cell	NELL1
0	1.48694	0.853	0.291	0	Granule cell	ARHGAP6
0	1.47983	0.68	0.133	0	Granule cell	GSG1L
0	1.46811	0.91	0.448	0	Granule cell	ELMOD1
0	1.45521	0.973	0.484	0	Granule cell	C8orf34
0	1.43782	0.997	0.683	0	Granule cell	KCTD16
0	1.42826	0.929	0.373	0	Granule cell	ZMAT4
0	1.41841	0.891	0.322	0	Granule cell	PDE7B
0	1.41825	0.948	0.423	0	Granule cell	UST
0	1.41507	0.843	0.285	0	Granule cell	THSD7B
0	1.41423	1	0.962	0	Granule cell	CADM2
0	1.40805	0.873	0.354	0	Granule cell	UNC13C
0	1.40557	0.831	0.238	0	Granule cell	ADRA1A
0	1.38957	0.996	0.611	0	Granule cell	GALNT17
0	1.38729	0.774	0.317	0	Granule cell	LAMA3
0	1.38142	0.799	0.234	0	Granule cell	IL1RAP
0	1.36107	0.985	0.551	0	Granule cell	SPOCK1
0	1.35335	0.999	0.877	0	Granule cell	NBEA
0	1.34719	0.989	0.763	0	Granule cell	ACAP2
0	1.34654	0.997	0.838	0	Granule cell	MYCBP2
0	1.33704	0.883	0.411	0	Granule cell	TBC1D1
0	1.33325	0.985	0.598	0	Granule cell	KCNH1
0	1.32825	0.919	0.394	0	Granule cell	KIAA1211L
0	1.32411	0.912	0.458	0	Granule cell	KIF26B
0	1.32032	0.988	0.619	0	Granule cell	DPYD
0	1.31971	0.854	0.359	0	Granule cell	SMAD3
0	1.31314	0.933	0.577	0	Granule cell	KLHL2
0	1.30964	0.905	0.434	0	Granule cell	GRK3
0	1.30229	0.992	0.62	0	Granule cell	CACNA1E
0	1.30026	0.876	0.386	0	Granule cell	ADCY1
0	1.29881	0.999	0.763	0	Granule cell	ERC2
0	1.29681	0.992	0.621	0	Granule cell	GALNT18
0	1.29494	0.929	0.459	0	Granule cell	CDH9
0	1.29427	0.701	0.188	0	Granule cell	NPY1R
0	1.29213	0.985	0.544	0	Granule cell	SHISA9
0	1.28971	0.995	0.587	0	Granule cell	CLSTN2
0	1.28528	1	0.915	0	Granule cell	RBFOX1
0	1.27716	0.999	0.894	0	Granule cell	PPP3CA
0	1.27698	0.992	0.631	0	Granule cell	MCTP1
0	1.26863	0.722	0.294	0	Granule cell	SNED1
0	1.26268	0.737	0.198	0	Granule cell	PLEKHA2
0	1.24586	0.974	0.56	0	Granule cell	ZBTB20
0	1.22405	0.734	0.235	0	Granule cell	PCBP3
0	1.2218	0.971	0.503	0	Granule cell	SEMA5A
0	1.20651	0.844	0.283	0	Granule cell	CHST9
0	1.19059	0.863	0.387	0	Granule cell	MAN1C1
0	1.18425	0.955	0.507	0	Granule cell	PGBD5
0	1.18227	0.921	0.52	0	Granule cell	GRIN2A
0	1.18215	0.962	0.498	0	Granule cell	KLHL29
0	1.17883	0.999	0.785	0	Granule cell	KALRN
0	1.1763	0.879	0.428	0	Granule cell	GABRG3
0	1.17583	0.973	0.465	0	Granule cell	CA10
0	1.1671	0.593	0.161	0	Granule cell	BDNF
0	1.16	0.522	0.114	0	Granule cell	C1QL3
0	1.15515	0.971	0.633	0	Granule cell	DIAPH2
0	1.1531	0.999	0.775	0	Granule cell	LRRC7
0	1.15238	0.995	0.683	0	Granule cell	CACNB2
0	1.14921	0.999	0.842	0	Granule cell	CSMD3
0	1.14242	0.78	0.28	0	Granule cell	SLC47A1
0	1.13971	0.771	0.227	0	Granule cell	BCL11B
0	1.12961	0.872	0.445	0	Granule cell	KIAA1549
0	1.11546	0.449	0.067	0	Granule cell	MALRD1
0	1.11151	0.769	0.335	0	Granule cell	BICC1
0	1.11073	0.535	0.05	0	Granule cell	TRPC6
0	1.10204	0.922	0.455	0	Granule cell	MAML3
0	1.10013	0.955	0.566	0	Granule cell	KCNJ3
0	1.09792	0.573	0.104	0	Granule cell	ADGRG2
0	1.08725	0.994	0.687	0	Granule cell	CAMK1D
0	1.08672	0.814	0.317	0	Granule cell	TANC1
0	1.07692	0.975	0.561	0	Granule cell	CAMK2A
0	1.07228	0.989	0.627	0	Granule cell	DGKG
0	1.05632	0.892	0.535	0	Granule cell	EML5
0	1.04209	0.925	0.499	0	Granule cell	CACNA1C
0	1.04043	0.979	0.554	0	Granule cell	GABBR2
0	1.0396	0.998	0.701	0	Granule cell	EPHA6
0	1.03768	1	0.859	0	Granule cell	KCNIP4
0	1.03706	0.708	0.291	0	Granule cell	PPM1E
0	1.0363	0.902	0.468	0	Granule cell	NECAB1
0	1.03272	0.814	0.376	0	Granule cell	NPTXR
0	1.03053	0.929	0.518	0	Granule cell	SUSD4
0	1.0272	0.822	0.363	0	Granule cell	DNAH9
0	1.02534	0.878	0.498	0	Granule cell	GFOD1
0	1.02289	0.985	0.628	0	Granule cell	FRMPD4
0	1.0176	0.398	0.119	0	Granule cell	LRRC3B
0	1.01759	0.936	0.601	0	Granule cell	CSNK1G1
0	0.995912	0.989	0.684	0	Granule cell	NTRK3
0	0.992952	0.71	0.255	0	Granule cell	FAT4
0	0.991941	0.952	0.675	0	Granule cell	CEP112
0	0.987086	0.986	0.715	0	Granule cell	CSMD2
0	0.984908	1	0.909	0	Granule cell	CSMD1
0	0.984039	0.492	0.145	0	Granule cell	ITGAE
0	0.983171	0.678	0.285	0	Granule cell	GABRA5
0	0.979978	0.856	0.389	0	Granule cell	PTK2B
0	0.978285	0.998	0.752	0	Granule cell	LRRTM4
0	0.977951	0.601	0.123	0	Granule cell	TSPAN18
0	0.974937	0.967	0.599	0	Granule cell	SORL1
0	0.966229	0.578	0.199	0	Granule cell	OPRD1
0	0.96303	0.82	0.439	0	Granule cell	CHCHD6
0	0.954459	0.858	0.493	0	Granule cell	MTMR7
0	0.920434	0.602	0.536	0	Granule cell	FAM155A
0	0.917581	0.458	0.253	0	Granule cell	ARHGAP44
0	0.916851	0.925	0.544	0	Granule cell	GABRA2
0	0.916837	0.985	0.663	0	Granule cell	CACNA2D1
0	0.912999	0.632	0.133	0	Granule cell	PROX1
0	0.908633	0.773	0.393	0	Granule cell	DPY19L3
0	0.907898	0.857	0.463	0	Granule cell	SCN3A
0	0.905902	0.965	0.631	0	Granule cell	NEBL
0	0.897495	0.526	0.145	0	Granule cell	NHSL2
0	0.890961	0.999	0.745	0	Granule cell	GRIA1
0	0.886236	0.996	0.704	0	Granule cell	GRIN2B
0	0.885742	0.551	0.202	0	Granule cell	RHBDL3
0	0.88167	0.747	0.334	0	Granule cell	ADAMTS3
0	0.880713	0.935	0.572	0	Granule cell	CACNA1D
0	0.874269	0.603	0.337	0	Granule cell	RBFOX3
0	0.869613	0.482	0.404	0	Granule cell	CELF2
0	0.863498	0.818	0.399	0	Granule cell	RASGRF2
0	0.863413	0.987	0.758	0	Granule cell	BTBD9
0	0.863374	0.484	0.124	0	Granule cell	LONRF3
0	0.862788	0.979	0.639	0	Granule cell	RAPGEF4
0	0.861751	0.963	0.6	0	Granule cell	KCNMA1
0	0.858879	0.943	0.645	0	Granule cell	NSF
0	0.85621	0.984	0.753	0	Granule cell	SIPA1L1
0	0.844717	0.97	0.728	0	Granule cell	TTC3
0	0.841725	0.789	0.443	0	Granule cell	CTDSPL
0	0.832754	0.799	0.445	0	Granule cell	GABRG2
0	0.829229	0.999	0.787	0	Granule cell	TENM2
0	2.34829	0.954	0.375	0	CA3	CPNE4
0	1.97017	1	0.881	0	CA3	OPCML
0	1.82133	0.908	0.251	0	CA3	B4GALNT3
0	1.72829	0.837	0.571	0	CA3	TRPS1
0	1.70883	0.977	0.633	0	CA3	RYR3
0	1.6985	0.787	0.261	0	CA3	TRHDE
0	1.68392	0.996	0.627	0	CA3	CLSTN2
0	1.66581	0.946	0.562	0	CA3	NETO1
0	1.65465	0.956	0.41	0	CA3	NRP1
0	1.64081	0.892	0.323	0	CA3	AFF2
0	1.6171	0.986	0.512	0	CA3	CELF4
0	1.60002	0.984	0.764	0	CA3	ROBO1
0	1.57015	0.993	0.685	0	CA3	PRKCE
0	1.55975	0.941	0.736	0	CA3	EPHA6
0	1.53392	0.997	0.831	0	CA3	PTPRG
0	1.53383	0.911	0.461	0	CA3	SLIT1
0	1.50177	0.897	0.38	0	CA3	NECTIN3
0	1.47693	0.995	0.713	0	CA3	ASIC2
0	1.43724	0.966	0.712	0	CA3	ROBO2
0	1.41515	0.887	0.532	0	CA3	KCNT2
0	1.38058	0.99	0.605	0	CA3	KHDRBS3
0	1.33995	0.961	0.474	0	CA3	AMPH
0	1.32544	0.896	0.549	0	CA3	EPHA4
0	1.29011	0.699	0.162	0	CA3	TSPAN18
0	1.27907	0.999	0.848	0	CA3	CNTNAP2
0	1.27675	0.744	0.355	0	CA3	TEAD1
0	1.25161	0.993	0.654	0	CA3	PDE1A
0	1.20447	0.982	0.651	0	CA3	GALNT17
0	1.19808	0.999	0.856	0	CA3	NRXN3
0	1.1924	0.978	0.526	0	CA3	SH3GL2
0	1.1866	0.998	0.77	0	CA3	GRIA1
0	1.16479	0.972	0.69	0	CA3	CACNA2D3
0	1.1424	0.54	0.407	0	CA3	CELF2
0	1.14146	0.991	0.638	0	CA3	AK5
0	1.12931	0.939	0.41	0	CA3	KCNN2
0	1.11298	0.954	0.727	0	CA3	KCNQ5
0	1.1096	0.965	0.596	0	CA3	SPOCK1
0	1.10582	0.337	0.194	0	CA3	RXFP1
0	1.10565	0.838	0.2	0	CA3	IQCJ
0	1.10507	0.947	0.421	0	CA3	CADPS2
0	1.09171	0.527	0.256	0	CA3	TENM4
0	1.07858	0.941	0.421	0	CA3	FAM189A1
0	1.07369	0.94	0.328	0	CA3	SV2B
0	1.07045	0.989	0.577	0	CA3	PRKAG2
0	1.06895	0.978	0.535	0	CA3	CAMK4
0	1.06309	0.851	0.304	0	CA3	SMPD3
0	1.06039	0.988	0.581	0	CA3	KSR2
0	1.05257	0.997	0.734	0	CA3	SLC8A1
0	1.05195	0.993	0.595	0	CA3	CACNA1B
0	1.05032	0.998	0.841	0	CA3	PDE4D
0	1.04688	0.983	0.58	0	CA3	PRICKLE2
0	1.04686	0.898	0.375	0	CA3	RAP1GAP2
0	1.03899	0.928	0.408	0	CA3	SNCA
0	1.03764	0.988	0.679	0	CA3	CDK14
0	1.03564	0.671	0.228	0	CA3	FREM1
0	1.03418	0.918	0.704	0	CA3	PRKCA
0	1.02709	0.962	0.469	0	CA3	DGKZ
0	1.02094	0.86	0.292	0	CA3	NT5DC3
0	1.01208	0.969	0.548	0	CA3	SLC35F3
0	1.00257	0.962	0.452	0	CA3	FAM135B
0	0.984047	0.941	0.584	0	CA3	NELL1
0	0.98164	0.843	0.324	0	CA3	SLC47A1
0	0.978197	0.94	0.553	0	CA3	PGBD5
0	0.975667	0.944	0.485	0	CA3	GRIK5
0	0.968074	0.867	0.388	0	CA3	GRIK4
0	0.965612	0.254	0.079	0	CA3	HTR2C
0	0.965403	0.896	0.306	0	CA3	IQSEC3
0	0.961254	0.948	0.427	0	CA3	SRRM4
0	0.951386	0.538	0.353	0	CA3	RIMS1
0	0.949829	0.988	0.601	0	CA3	CAMK2A
0	0.945996	0.749	0.318	0	CA3	KIAA1217
0	0.944383	0.692	0.153	0	CA3	SLC12A3
0	0.943501	0.995	0.754	0	CA3	NELL2
0	0.940628	0.942	0.519	0	CA3	EFR3A
0	0.940438	0.935	0.44	0	CA3	SCN3B
0	0.939519	0.856	0.274	0	CA3	RASGRP1
0	0.93355	0.975	0.552	0	CA3	NOS1AP
0	0.93335	0.994	0.658	0	CA3	DYNC1I1
0	0.931275	0.998	0.88	0	CA3	MAPK10
0	0.930874	0.641	0.099	0	CA3	NPFFR2
0	0.928631	0.881	0.364	0	CA3	ADAMTS3
0	0.925837	0.992	0.762	0	CA3	ERC1
0	0.92235	0.874	0.269	0	CA3	ELAVL2
0	0.920751	0.921	0.462	0	CA3	CDH11
0	0.920588	0.99	0.634	0	CA3	TMEM178B
0	0.91509	0.822	0.184	0	CA3	RAB26
0	0.913321	0.979	0.554	0	CA3	LDB2
0	0.90965	0.995	0.67	0	CA3	CACNA1A
0	0.909108	0.99	0.672	0	CA3	SLC44A5
0	0.907808	0.991	0.634	0	CA3	KCNMA1
0	0.901831	0.969	0.619	0	CA3	EPHA5
0	0.900658	0.981	0.657	0	CA3	MSRA
0	0.899434	0.844	0.792	0	CA3	UNC5C
0	0.897646	0.862	0.303	0	CA3	SIDT1
0	0.875237	0.962	0.521	0	CA3	APBA2
0	0.871066	0.924	0.358	0	CA3	ADAM11
0	0.870101	0.963	0.564	0	CA3	PLXNA4
0	0.850425	0.914	0.451	0	CA3	MYO16
0	0.847105	0.991	0.741	0	CA3	AAK1
0	0.843351	0.987	0.557	0	CA3	HSPA12A
0	0.842398	0.963	0.491	0	CA3	PTPRR
0	0.839754	0.982	0.588	0	CA3	NIN
0	0.836808	0.989	0.719	0	CA3	CAMK1D
0	0.834844	0.995	0.844	0	CA3	DOCK4
0	0.833844	0.793	0.222	0	CA3	SORCS2
0	0.827975	0.987	0.73	0	CA3	ARL15
0	0.825333	0.867	0.541	0	CA3	CDH12
0	0.817054	0.99	0.676	0	CA3	SYN2
0	0.812106	0.85	0.393	0	CA3	SYNDIG1
0	0.808338	0.777	0.376	0	CA3	PRICKLE1
0	0.807534	0.857	0.312	0	CA3	SULF2
0	0.807145	0.906	0.471	0	CA3	SNTG1
0	0.803574	0.961	0.779	0	CA3	TMTC1
0	0.802967	0.546	0.126	0	CA3	PTGER3
0	0.800384	0.859	0.313	0	CA3	NPTX1
0	0.792629	0.992	0.738	0	CA3	SNAP25
0	0.792589	0.835	0.27	0	CA3	SLC6A7
0	0.792334	0.632	0.133	0	CA3	NRIP3
0	0.790293	1	0.918	0	CA3	CSMD1
0	0.790183	0.982	0.559	0	CA3	KCNJ6
0	0.788501	0.872	0.382	0	CA3	ANKRD33B
0	0.787481	0.725	0.132	0	CA3	SEMA5B
0	0.787358	0.767	0.285	0	CA3	OVCH1
0	0.785581	0.999	0.923	0	CA3	RBFOX1
0	0.781501	0.839	0.454	0	CA3	MPPED2
0	0.778324	0.982	0.655	0	CA3	ATP2B1
0	0.776654	0.995	0.757	0	CA3	OXR1
0	0.776274	0.95	0.531	0	CA3	TENM3
0	0.775177	0.99	0.619	0	CA3	DNM1
0	0.774925	1	0.892	0	CA3	SYT1
0	0.774433	0.896	0.415	0	CA3	MAN1A1
0	0.772162	0.977	0.523	0	CA3	SGSM1
0	0.77183	0.981	0.67	0	CA3	FOCAD
0	0.766173	0.825	0.29	0	CA3	HTR4
0	0.76316	0.831	0.286	0	CA3	SEMA3E
0	0.759508	0.992	0.663	0	CA3	FRMPD4
0	0.755276	0.963	0.443	0	CA3	KIAA1211L
0	0.754313	0.401	0.058	0	CA3	NPNT
0	0.753575	0.597	0.15	0	CA3	CBLN2
0	0.751737	0.982	0.614	0	CA3	NAV3
0	0.751687	0.999	0.865	0	CA3	CCSER1
0	0.750451	0.997	0.733	0	CA3	GRIN2B
0	0.747619	0.862	0.357	0	CA3	KIAA1671
0	0.746873	0.888	0.433	0	CA3	PTK2B
0	0.7465	0.986	0.654	0	CA3	XKR4
0	0.745355	0.992	0.709	0	CA3	ARHGAP26
0	0.744295	0.962	0.453	0	CA3	MTUS2
0	0.742699	0.991	0.762	0	CA3	MAP1B
0	0.741775	0.994	0.632	0	CA3	XYLT1
0	0.740398	0.795	0.368	0	CA3	TANC1
0	3.55225	0.999	0.259	0	CA2	TSHZ2
0	2.76867	0.997	0.332	0	CA2	PTPRT
0	2.72968	0.565	0.062	0	CA2	HTR1F
0	2.43924	0.986	0.271	0	CA2	TOX
0	2.30391	0.979	0.2	0	CA2	VWC2L
0	2.21946	0.998	0.441	0	CA2	GPC6
0	2.12913	0.971	0.242	0	CA2	EPHA3
0	2.11974	0.976	0.309	0	CA2	KCNH5
0	2.10031	0.994	0.427	0	CA2	OLFM3
0	2.05507	0.979	0.242	0	CA2	SATB2
0	2.04558	0.992	0.406	0	CA2	PDZRN4
0	1.93877	0.998	0.583	0	CA2	KCNB2
0	1.83183	0.95	0.441	0	CA2	NCALD
0	1.81682	0.996	0.614	0	CA2	TRPM3
0	1.7187	0.987	0.548	0	CA2	PRR16
0	1.70801	0.937	0.27	0	CA2	PDZRN3
0	1.67748	0.94	0.325	0	CA2	ADGRL2
0	1.65928	0.825	0.266	0	CA2	SEMA6D
0	1.63986	0.996	0.551	0	CA2	CDH12
0	1.6314	0.936	0.301	0	CA2	SGCD
0	1.59492	0.81	0.121	0	CA2	ADAMTS16
0	1.59152	0.687	0.173	0	CA2	PCP4
0	1.56019	0.997	0.571	0	CA2	LDB2
0	1.54608	0.999	0.736	0	CA2	ARPP21
0	1.54423	0.835	0.209	0	CA2	TSHZ3
0	1.52742	0.993	0.567	0	CA2	MEF2C
0	1.51594	0.938	0.215	0	CA2	FSTL4
0	1.51117	0.963	0.454	0	CA2	EFNA5
0	1.48765	0.996	0.621	0	CA2	KHDRBS3
0	1.44812	0.92	0.36	0	CA2	NWD2
0	1.41762	0.987	0.493	0	CA2	HECW1
0	1.41754	0.687	0.027	0	CA2	ABCA12
0	1.40273	0.916	0.178	0	CA2	RXFP1
0	1.38819	0.61	0.206	0	CA2	CCK
0	1.37257	0.998	0.605	0	CA2	SHISA9
0	1.35893	0.996	0.596	0	CA2	PCSK2
0	1.3565	0.703	0.37	0	CA2	RBFOX3
0	1.34455	1	0.878	0	CA2	KCNIP4
0	1.33969	0.989	0.591	0	CA2	LDLRAD4
0	1.33814	1	0.817	0	CA2	TENM2
0	1.33412	0.517	0.209	0	CA2	NEFL
0	1.3324	0.859	0.226	0	CA2	IQCJ
0	1.32528	0.694	0.098	0	CA2	RSPO2
0	1.30115	0.958	0.307	0	CA2	EPHB1
0	1.30011	0.993	0.622	0	CA2	MYRIP
0	1.28627	0.936	0.366	0	CA2	SYN3
0	1.2823	0.996	0.749	0	CA2	SNAP25
0	1.25922	0.999	0.746	0	CA2	GRM7
0	1.25308	0.999	0.853	0	CA2	CTNNA2
0	1.25234	0.914	0.304	0	CA2	SEL1L3
0	1.24636	0.81	0.217	0	CA2	CLMP
0	1.24387	0.997	0.71	0	CA2	NRG1
0	1.2112	0.986	0.612	0	CA2	RUNX1T1
0	1.21049	0.9	0.429	0	CA2	VSNL1
0	1.20001	0.943	0.409	0	CA2	RGS6
0	1.16809	0.803	0.15	0	CA2	OSBPL3
0	1.16601	0.77	0.136	0	CA2	FOXP2
0	1.14852	0.806	0.194	0	CA2	SEC24D
0	1.14734	0.998	0.742	0	CA2	AGBL4
0	1.14425	0.843	0.367	0	CA2	RIT2
0	1.14295	0.728	0.442	0	CA2	LRRC4C
0	1.12957	0.795	0.335	0	CA2	PALLD
0	1.12929	0.841	0.363	0	CA2	STMN2
0	1.12892	0.974	0.567	0	CA2	SCAI
0	1.12758	0.956	0.355	0	CA2	SORCS1
0	1.12621	0.715	0.141	0	CA2	MYO5C
0	1.12312	0.995	0.651	0	CA2	KCNH1
0	1.12123	0.998	0.735	0	CA2	KCNQ5
0	1.11642	0.726	0.149	0	CA2	GFRA2
0	1.11216	0.924	0.4	0	CA2	ADAMTSL3
0	1.10298	0.977	0.5	0	CA2	SLIT2
0	1.09742	0.993	0.695	0	CA2	DGKI
0	1.09489	0.991	0.686	0	CA2	SLC44A5
0	1.09414	0.847	0.282	0	CA2	DOK5
0	1.0883	0.634	0.13	0	CA2	TLL1
0	1.07248	0.563	0.06	0	CA2	SLC38A11
0	1.05307	0.999	0.813	0	CA2	GRM5
0	1.04746	0.944	0.527	0	CA2	THRB
0	1.04628	0.771	0.211	0	CA2	TSHZ1
0	1.04626	0.974	0.448	0	CA2	ZMAT4
0	1.03896	0.997	0.837	0	CA2	PBX1
0	1.03851	0.755	0.175	0	CA2	CRTAC1
0	1.03466	0.834	0.303	0	CA2	MLIP
0	1.0228	0.731	0.201	0	CA2	OCA2
0	1.0135	0.9	0.385	0	CA2	CIT
0	1.00882	0.89	0.456	0	CA2	PDE10A
0	1.00337	0.58	0.118	0	CA2	CUX2
0	0.994284	0.99	0.646	0	CA2	UNC5D
0	0.991422	0.864	0.451	0	CA2	GUCY1A2
0	0.98351	0.762	0.216	0	CA2	ST6GAL1
9.26568e-308	0.98103	0.896	0.652	1.26736e-303	CA2	CALM1
0	0.979147	0.437	0.02	0	CA2	GLP2R
0	0.973333	1	0.851	0	CA2	RGS7
0	0.97301	0.999	0.892	0	CA2	PHACTR1
0	0.96449	0.852	0.403	0	CA2	ACVR2A
0	0.96266	0.98	0.617	0	CA2	GABRB2
0	0.961411	0.844	0.337	0	CA2	GAP43
0	0.950632	0.848	0.311	0	CA2	CNIH3
0	0.941624	0.802	0.261	0	CA2	TRPC4
0	0.937149	0.816	0.271	0	CA2	GRM8
0	0.936389	0.822	0.38	0	CA2	GABRA1
0	0.91963	0.989	0.68	0	CA2	XKR6
0	0.91737	0.912	0.364	0	CA2	TRPC5
0	0.904022	0.652	0.13	0	CA2	CAPS2
0	0.900453	0.469	0.148	0	CA2	NEFM
0	0.900388	0.987	0.535	0	CA2	CA10
0	0.894928	0.846	0.335	0	CA2	SATB1
0	0.894578	0.994	0.668	0	CA2	ATP8A2
0	0.893994	0.971	0.613	0	CA2	AHI1
0	0.888659	0.829	0.416	0	CA2	PKNOX2
0	0.88512	0.938	0.477	0	CA2	PLXNA2
2.32034e-268	0.879598	0.456	0.271	3.17377e-264	CA2	TENM4
0	0.878192	1	0.911	0	CA2	NKAIN2
0	0.873356	0.649	0.156	0	CA2	SNCAIP
0	0.864736	0.935	0.516	0	CA2	CDKL5
0	0.864306	0.977	0.636	0	CA2	STXBP1
0	0.863523	0.898	0.504	0	CA2	SSBP3
0	0.856119	0.801	0.269	0	CA2	SLC8A3
0	0.853147	0.585	0.083	0	CA2	GRM4
0	0.846852	0.858	0.351	0	CA2	HIVEP1
0	0.841407	0.9	0.46	0	CA2	REEP1
0	0.839083	0.995	0.649	0	CA2	TMEM178B
0	0.837256	0.541	0.088	0	CA2	CCDC3
0	0.833502	0.636	0.301	0	CA2	ZBTB18
0	0.826055	0.975	0.602	0	CA2	CHL1
0	0.825045	0.988	0.772	0	CA2	MAP1B
0	0.824169	0.549	0.241	0	CA2	SYT4
0	0.818925	0.978	0.59	0	CA2	SPTBN4
0	0.815324	0.992	0.69	0	CA2	SYN2
0	0.814261	0.738	0.245	0	CA2	MGAT5B
0	0.814196	0.949	0.583	0	CA2	SPAG16
0	0.811697	0.996	0.708	0	CA2	KCNQ3
0	0.81116	0.577	0.136	0	CA2	COL26A1
0	0.809875	0.661	0.268	0	CA2	FAM3C
0	0.808895	0.571	0.15	0	CA2	ST6GAL2
0	0.802814	0.96	0.48	0	CA2	FARP1
0	0.802488	0.97	0.706	0	CA2	SDCCAG8
0	0.802185	0.642	0.114	0	CA2	MYLK
0	0.797237	0.956	0.576	0	CA2	ARMC9
0	0.791992	0.898	0.422	0	CA2	PDE2A
0	0.791084	0.678	0.211	0	CA2	HRH2
0	0.788852	0.887	0.46	0	CA2	PAK1
0	0.782518	0.97	0.615	0	CA2	PAK5
0	0.782409	0.905	0.479	0	CA2	EPB41L3
0	0.781987	0.428	0.208	0	CA2	LNX1
0	0.771745	0.839	0.378	0	CA2	ELAVL4
0	0.770332	0.82	0.399	0	CA2	PTPN5
0	0.769379	0.999	0.814	0	CA2	FGF12
0	0.76897	0.647	0.208	0	CA2	GALNT9
7.12642e-271	0.461297	0.297	0.124	9.74751e-267	CA2	RGS4
0	1.70999	0.948	0.414	0	CA1	HECW1
0	1.6153	0.974	0.5	0	CA1	LDB2
0	1.57444	0.993	0.874	0	CA1	PHACTR1
0	1.56579	0.811	0.148	0	CA1	SATB2
0	1.54889	0.943	0.481	0	CA1	PRKCB
0	1.52477	0.445	0.103	0	CA1	POU6F2
0	1.51975	0.565	0.169	0	CA1	FSTL4
0	1.48873	0.937	0.598	0	CA1	RYR3
0	1.44233	0.99	0.859	0	CA1	KCNIP4
0	1.42669	0.733	0.285	0	CA1	TMEM132D
0	1.41446	0.811	0.385	0	CA1	CADPS2
0	1.4058	0.836	0.287	0	CA1	SYN3
0	1.39489	0.71	0.249	0	CA1	KCNH7
0	1.32589	0.831	0.315	0	CA1	CNTN3
0	1.29355	0.986	0.703	0	CA1	SLC8A1
0	1.23437	0.558	0.171	0	CA1	SNTG2
0	1.23223	0.739	0.229	0	CA1	MLIP
0	1.21324	0.911	0.541	0	CA1	CNTNAP5
0	1.21055	0.985	0.679	0	CA1	ASIC2
0	1.20477	0.944	0.5	0	CA1	SLC35F3
0	1.18459	0.988	0.691	0	CA1	ARPP21
0	1.17132	0.914	0.462	0	CA1	SORBS2
0	1.16407	0.587	0.293	0	CA1	CCBE1
0	1.16341	0.932	0.687	0	CA1	ROBO2
0	1.16333	0.562	0.224	0	CA1	TSHZ2
0	1.15835	0.933	0.438	0	CA1	PTPRR
0	1.15389	0.921	0.385	0	CA1	CDH18
0	1.13012	0.997	0.867	0	CA1	OPCML
0	1.1272	0.971	0.664	0	CA1	NRG1
0	1.12615	0.88	0.264	0	CA1	SV2B
0	1.11089	0.827	0.367	0	CA1	KCNN2
0	1.10302	0.808	0.291	0	CA1	LMO4
0	1.09199	0.599	0.195	0	CA1	EPHA3
0	1.08798	0.961	0.618	0	CA1	ATP2B1
0	1.08659	0.783	0.339	0	CA1	SORCS3
0	1.08621	0.943	0.476	0	CA1	SH3GL2
0	1.08342	0.915	0.459	0	CA1	THRB
0	1.08017	0.858	0.356	0	CA1	OLFM3
0	1.07359	0.97	0.593	0	CA1	TMEM178B
0	1.06615	0.712	0.365	0	CA1	RGS6
0	1.06361	0.929	0.396	0	CA1	MTUS2
0	1.05515	0.85	0.389	0	CA1	EFNA5
0	1.05273	0.72	0.168	0	CA1	PAPSS2
0	1.04824	0.909	0.446	0	CA1	HOMER1
0	1.04821	0.492	0.401	0	CA1	CELF2
0	1.04469	0.992	0.866	0	CA1	MAPK10
0	1.04368	0.957	0.581	0	CA1	DOK6
0	1.03314	0.966	0.531	0	CA1	PCSK2
0	1.03256	0.503	0.223	0	CA1	IL1RAPL2
0	1.02693	0.93	0.583	0	CA1	EPHA5
0	1.02583	0.437	0.154	0	CA1	RXFP1
0	1.02096	0.992	0.698	0	CA1	AGBL4
0	1.01814	0.947	0.621	0	CA1	PDE1A
0	1.01042	0.896	0.338	0	CA1	PDE2A
0	1.0059	0.906	0.41	0	CA1	CACNG3
0	1.0055	0.481	0.118	0	CA1	AGBL1
0	1.0041	0.821	0.331	0	CA1	ANKRD33B
0	1.00388	0.343	0.202	0	CA1	CNN3
0	1.00147	0.658	0.358	0	CA1	LRFN5
0	0.991401	0.974	0.731	0	CA1	RIMS2
0	0.988662	0.97	0.676	0	CA1	R3HDM1
0	0.977742	0.679	0.279	0	CA1	KIAA1217
0	0.964133	0.947	0.536	0	CA1	PRICKLE2
0	0.958796	0.866	0.355	0	CA1	SNCA
0	0.957673	0.989	0.777	0	CA1	LARGE1
0	0.943029	0.655	0.321	0	CA1	RBFOX3
0	0.94298	0.902	0.709	0	CA1	KCNQ5
0	0.929766	0.94	0.54	0	CA1	KSR2
0	0.927359	0.775	0.38	0	CA1	MAN1A1
0	0.927317	0.968	0.524	0	CA1	SHANK2
0	0.922514	0.933	0.537	0	CA1	PRKAG2
0	0.92101	0.995	0.783	0	CA1	KALRN
0	0.919655	0.973	0.653	0	CA1	GRIA3
0	0.91765	0.718	0.159	0	CA1	IGSF21
0	0.91742	0.953	0.51	0	CA1	HSPA12A
0	0.916586	0.73	0.235	0	CA1	NGEF
0	0.915787	0.913	0.429	0	CA1	ACTN1
0	0.915377	0.847	0.369	0	CA1	NPAS2
0	0.915062	0.998	0.879	0	CA1	SYT1
0	0.911274	0.973	0.789	0	CA1	DPP10
0	0.904921	0.993	0.828	0	CA1	DMD
0	0.90068	0.938	0.556	0	CA1	RUNX1T1
0	0.894772	0.708	0.438	0	CA1	MYO16
0	0.894008	0.972	0.707	0	CA1	GRM7
0	0.888243	0.944	0.593	0	CA1	ATRNL1
0	0.883	0.259	0.119	0	CA1	RORB
0	0.882315	0.572	0.215	0	CA1	TRPC4
0	0.876146	0.999	0.939	0	CA1	ADGRB3
0	0.870664	0.531	0.148	0	CA1	KLHL1
0	0.868749	0.465	0.198	0	CA1	MICAL2
0	0.861465	0.608	0.17	0	CA1	IQCJ
0	0.860961	0.771	0.377	0	CA1	NDST3
0	0.860604	0.952	0.564	0	CA1	KHDRBS3
0	0.858577	0.994	0.848	0	CA1	NEGR1
0	0.854882	0.829	0.361	0	CA1	VSNL1
0	0.852288	0.974	0.592	0	CA1	KCNMA1
0	0.849064	0.905	0.491	0	CA1	CDH12
0	0.848254	0.673	0.202	0	CA1	ST8SIA5
0	0.844934	0.928	0.49	0	CA1	CAMK4
0	0.833203	0.718	0.305	0	CA1	NWD2
0	0.831603	0.958	0.601	0	CA1	AK5
0	0.827985	0.355	0.081	0	CA1	RGS4
0	0.826372	0.949	0.482	0	CA1	GRIN1
0	0.821379	0.968	0.523	0	CA1	SPTBN4
0	0.820397	0.969	0.824	0	CA1	PEX5L
0	0.819476	0.692	0.306	0	CA1	SORCS1
0	0.817916	0.995	0.785	0	CA1	TENM2
0	0.8149	0.75	0.217	0	CA1	SLC6A7
0	0.81472	0.908	0.401	0	CA1	CHD5
0	0.814704	0.967	0.595	0	CA1	CHSY3
0	0.814101	0.955	0.563	0	CA1	PCNX2
0	0.812443	0.82	0.337	0	CA1	RAP1GAP
0	0.809156	0.968	0.556	0	CA1	CAMK2A
0	0.804528	0.98	0.753	0	CA1	LRRTM4
0	0.804481	0.815	0.358	0	CA1	ANO3
0	0.804191	0.981	0.709	0	CA1	SNAP25
0	0.80076	0.994	0.849	0	CA1	CCSER1
0	0.794185	0.999	0.913	0	CA1	RBFOX1
0	0.79396	0.867	0.379	0	CA1	SRRM4
0	0.788859	0.875	0.504	0	CA1	ADCY2
0	0.78714	0.976	0.676	0	CA1	ARHGAP26
0	0.786929	0.887	0.419	0	CA1	ITPR1
0	0.78479	0.611	0.19	0	CA1	ARHGAP10
0	0.782462	0.971	0.646	0	CA1	DGKI
0	0.778495	0.994	0.822	0	CA1	PDE4D
0	0.77456	0.986	0.726	0	CA1	NELL2
0	0.768998	0.989	0.709	0	CA1	DCLK1
0	0.768049	0.972	0.549	0	CA1	CACNA1B
0	0.766363	0.775	0.261	0	CA1	GAP43
0	0.764048	0.997	0.83	0	CA1	STXBP5L
0	0.759598	0.516	0.12	0	CA1	IL12RB2
0	0.759227	0.962	0.634	0	CA1	FOCAD
0	0.758921	0.773	0.319	0	CA1	ADAM11
0	0.754917	0.862	0.458	0	CA1	NYAP2
0	0.748867	0.959	0.638	0	CA1	FBXW7
0	0.747504	0.66	0.213	0	CA1	RFTN1
0	0.747444	0.732	0.275	0	CA1	RTN4RL1
0	0.745527	0.782	0.371	0	CA1	OLFM1
0	0.74528	0.683	0.238	0	CA1	RASGRP1
0	0.743558	0.433	0.142	0	CA1	SLC12A3
0	0.742497	0.966	0.58	0	CA1	SYBU
0	0.739066	0.963	0.573	0	CA1	SCN8A
0	0.738872	0.992	0.781	0	CA1	GRM5
0	0.73696	0.832	0.315	0	CA1	SYT7
0	0.735938	0.905	0.503	0	CA1	EPHA4
0	0.735286	0.817	0.394	0	CA1	PDE10A
0	0.734398	0.703	0.204	0	CA1	STUM
0	0.732908	0.995	0.772	0	CA1	LRRC7
0	0.732171	0.782	0.309	0	CA1	ELAVL4
0	0.723988	0.6	0.108	0	CA1	MPPED1
