# Supplementary material for: Transcriptome dynamics of hippocampal neurogenesis in macaques across the lifespan and aged humans
Source: Research Square preprint supplement (doi:10.21203/rs.3.rs-1015150/v1), 2021-11-18
Supplement: Supplementary file 6 [file cf6b5cbfa6ff353c59bbdd4b.xlsx]

## Sheet: Table S7
Supplementary Table7: Differentially expressed genes between human Astrocyte and NSC
	p_val	avg_log2FC	pct.1	pct.2	p_val_adj	cluster	gene
1	9.58948e-105	2.02487	0.899	0.575	2.7143e-100	Astrocyte	DCLK1
2	1.18413e-55	2.01149	0.695	0.375	3.35168e-51	Astrocyte	LINC01088
3	3.38656e-76	1.93122	0.623	0.151	9.58566e-72	Astrocyte	TSHZ2
4	4.99134e-79	1.91342	0.604	0.125	1.4128e-74	Astrocyte	SLC38A1
5	6.8964e-79	1.72828	0.526	0.043	1.95203e-74	Astrocyte	LINC00836
6	3.46671e-62	1.70313	0.742	0.44	9.81253e-58	Astrocyte	KAZN
7	1.58442e-46	1.60183	0.653	0.343	4.48471e-42	Astrocyte	CD44
8	5.32602e-64	1.58596	0.583	0.177	1.50753e-59	Astrocyte	SLCO3A1
9	9.97355e-32	1.47423	0.606	0.401	2.82301e-27	Astrocyte	LRRTM4
10	2.86844e-05	1.45017	0.326	0.269	0.811911	Astrocyte	IL1RAPL1
11	4.82667e-12	1.44058	0.315	0.183	1.36619e-07	Astrocyte	CTNNA3
12	5.28859e-33	1.41398	0.941	0.912	1.49693e-28	Astrocyte	FP236383.1
13	1.78414e-27	1.40912	0.438	0.203	5.05e-23	Astrocyte	HS6ST3
14	3.02851e-33	1.3734	0.326	0.069	8.57219e-29	Astrocyte	CCDC85A
15	2.24357e-39	1.34208	0.629	0.405	6.35042e-35	Astrocyte	STXBP5L
16	1.74616e-49	1.33155	0.724	0.418	4.94251e-45	Astrocyte	TNC
17	1.41465e-50	1.28075	0.807	0.623	4.00417e-46	Astrocyte	AC073941.1
18	5.08108e-36	1.27453	0.541	0.293	1.4382e-31	Astrocyte	GALNT15
19	2.61592e-46	1.27386	0.503	0.157	7.40437e-42	Astrocyte	KCNJ3
20	7.57547e-37	1.25203	0.627	0.364	2.14424e-32	Astrocyte	ADAMTSL3
21	3.99167e-50	1.2259	0.859	0.709	1.12984e-45	Astrocyte	DPP6
22	9.07677e-06	1.21461	0.464	0.455	0.256918	Astrocyte	NRXN3
23	4.27941e-16	1.18223	0.559	0.459	1.21129e-11	Astrocyte	LINC01094
24	9.92454e-32	1.16922	0.677	0.524	2.80914e-27	Astrocyte	SNED1
25	4.5138e-43	1.1669	0.94	0.912	1.27763e-38	Astrocyte	GFAP
26	1.02975e-23	1.11199	0.752	0.685	2.91472e-19	Astrocyte	MIR4300HG
27	4.09661e-10	1.08361	0.302	0.187	1.15955e-05	Astrocyte	ROBO2
28	4.25658e-10	1.08186	0.44	0.341	1.20483e-05	Astrocyte	PLP1
29	1.03777e-23	1.07637	0.351	0.132	2.93742e-19	Astrocyte	ST6GAL1
30	1.64151e-28	1.07401	0.31	0.076	4.64629e-24	Astrocyte	GALNT13
31	1.64518e-20	1.0651	0.931	0.955	4.65667e-16	Astrocyte	FP671120.1
32	1.75299e-32	1.01635	0.448	0.181	4.96185e-28	Astrocyte	KCNN2
33	1.43169e-33	0.994215	0.445	0.174	4.0524e-29	Astrocyte	ELN
34	1.01705e-21	0.993029	0.57	0.412	2.87876e-17	Astrocyte	SPOCK1
35	1.80916e-33	0.984551	0.324	0.062	5.12083e-29	Astrocyte	FYB2
36	6.46052e-05	0.978007	0.456	0.438	1	Astrocyte	SYT1
37	2.74782e-31	0.976886	0.291	0.047	7.77771e-27	Astrocyte	PRR16
38	1.51791e-15	0.970323	0.257	0.099	4.29645e-11	Astrocyte	KIAA1217
39	8.0816e-30	0.969801	0.807	0.718	2.2875e-25	Astrocyte	PLEKHA5
40	2.67142e-25	0.963636	0.386	0.151	7.56146e-21	Astrocyte	SPARC
41	0.00230147	0.960768	0.384	0.388	1	Astrocyte	MBP
42	1.63268e-33	0.960091	0.76	0.683	4.62129e-29	Astrocyte	NFASC
43	0.00345483	0.953101	0.21	0.166	1	Astrocyte	SLC24A2
44	1.24597e-11	0.925178	0.173	0.05	3.52671e-07	Astrocyte	XIST
45	5.56989e-15	0.921663	0.265	0.112	1.57656e-10	Astrocyte	TTN
46	1.07561e-28	0.919322	0.508	0.257	3.04452e-24	Astrocyte	MATN2
47	6.12365e-20	0.917617	0.717	0.683	1.7333e-15	Astrocyte	2021-03-03
48	4.98142e-19	0.907392	0.6	0.444	1.40999e-14	Astrocyte	DGKB
49	6.00344e-07	0.902652	0.432	0.382	0.0169927	Astrocyte	NLGN1
50	1.85422e-06	0.892856	0.316	0.231	0.0524837	Astrocyte	PDZRN4
51	1.24807e-13	0.883527	0.466	0.347	3.53268e-09	Astrocyte	GRIA1
52	0.000166171	0.878487	0.163	0.103	1	Astrocyte	ST18
53	1.88419e-15	0.870313	0.36	0.194	5.33319e-11	Astrocyte	DOCK10
54	6.72742e-06	0.861413	0.409	0.356	0.19042	Astrocyte	RNF220
55	2.76633e-10	0.842771	0.568	0.532	7.83009e-06	Astrocyte	PTPRD
56	1.97683e-06	0.836214	0.657	0.644	0.0559541	Astrocyte	MAP1B
57	1.22746e-25	0.825729	0.345	0.116	3.47432e-21	Astrocyte	SYNDIG1
58	2.92368e-14	0.821403	0.47	0.328	8.27547e-10	Astrocyte	TNR
59	0.00106317	0.818867	0.247	0.201	1	Astrocyte	EDIL3
60	1.37352e-20	0.817036	0.535	0.306	3.88775e-16	Astrocyte	RGS6
61	2.28563e-16	0.795083	0.79	0.785	6.46947e-12	Astrocyte	LINC00609
62	1.61364e-09	0.794127	0.596	0.554	4.5674e-05	Astrocyte	ADAMTS9-AS2
63	1.29532e-17	0.793169	0.541	0.409	3.6664e-13	Astrocyte	CLIP2
64	3.26941e-13	0.779619	0.984	1	9.25406e-09	Astrocyte	NEAT1
65	1.04768e-07	0.778267	0.335	0.244	0.00296546	Astrocyte	TTLL7
66	5.83072e-09	0.768369	0.597	0.563	0.000165039	Astrocyte	KCNIP4
67	9.50947e-24	0.760962	0.777	0.715	2.69166e-19	Astrocyte	VCAN
68	9.4187e-13	0.754289	0.367	0.226	2.66596e-08	Astrocyte	MAN1C1
69	1.534e-11	0.754234	0.442	0.312	4.342e-07	Astrocyte	DIRC3
70	1.82445e-13	0.747654	0.431	0.3	5.16412e-09	Astrocyte	RTN1
71	6.80267e-08	0.745664	0.638	0.644	0.0019255	Astrocyte	CSMD1
72	4.86342e-19	0.744822	0.394	0.205	1.37659e-14	Astrocyte	SMOC1
73	3.61612e-21	0.739282	0.265	0.067	1.02354e-16	Astrocyte	LINC01411
74	1.40026e-15	0.736171	0.345	0.17	3.96345e-11	Astrocyte	IGFBP5
75	0.000140173	0.728095	0.179	0.118	1	Astrocyte	SPOCK3
76	1.97307e-18	0.727981	0.523	0.332	5.58477e-14	Astrocyte	NTNG1
77	2.07496e-13	0.726402	0.595	0.511	5.87317e-09	Astrocyte	GSE1
78	1.82019e-16	0.725132	0.469	0.299	5.15204e-12	Astrocyte	SLC24A4
79	8.03043e-05	0.723702	0.347	0.289	1	Astrocyte	HSPB1
80	1.9444e-08	0.719495	0.242	0.14	0.000550362	Astrocyte	GRIN2A
81	1.15706e-12	0.708325	0.618	0.567	3.27507e-08	Astrocyte	SLC16A1-AS1
82	6.51004e-06	0.705861	0.156	0.082	0.184267	Astrocyte	CCK
83	3.28534e-06	0.70404	0.234	0.153	0.0929915	Astrocyte	C8orf34
84	9.42705e-17	0.699811	0.204	0.05	2.66833e-12	Astrocyte	LRAT
85	5.28702e-20	0.693761	0.18	0.021	1.49649e-15	Astrocyte	SLC8A3
86	3.87376e-16	0.689214	0.183	0.039	1.09647e-11	Astrocyte	AL603840.1
87	6.85217e-13	0.689076	0.415	0.285	1.93951e-08	Astrocyte	FRY
88	1.74394e-26	0.688351	0.839	0.853	4.93623e-22	Astrocyte	DAAM2
89	0.000141102	0.687	0.155	0.093	1	Astrocyte	ELMO1
90	3.52442e-14	0.68644	0.619	0.506	9.97586e-10	Astrocyte	COL21A1
91	1.8134e-19	0.685928	0.252	0.075	5.13284e-15	Astrocyte	APLNR
92	4.81697e-06	0.680513	0.231	0.153	0.136344	Astrocyte	SNTG1
93	2.31549e-15	0.677168	0.619	0.539	6.554e-11	Astrocyte	GRIK4
94	1.0867e-13	0.676691	0.635	0.506	3.07592e-09	Astrocyte	LMNTD1
95	5.58838e-11	0.668351	0.28	0.147	1.58179e-06	Astrocyte	MYRIP
96	1.97617e-11	0.667646	0.478	0.353	5.59356e-07	Astrocyte	CFAP47
97	1.37301e-14	0.666889	0.31	0.151	3.88631e-10	Astrocyte	AEBP1
98	2.98844e-10	0.663589	0.381	0.259	8.45877e-06	Astrocyte	DPYD
99	5.1158e-08	0.652622	0.548	0.506	0.00144803	Astrocyte	PHYHD1
100	1.43958e-15	0.645508	0.632	0.515	4.07473e-11	Astrocyte	PLCE1
101	3.27068e-06	0.645366	0.133	0.06	0.0925766	Astrocyte	AC016766.1
102	4.56992e-15	0.641337	0.365	0.203	1.29352e-10	Astrocyte	USH1C
103	3.1466e-06	0.635857	0.405	0.343	0.0890644	Astrocyte	KIF6
104	0.00352917	0.635615	0.281	0.246	1	Astrocyte	DHFR
105	1.22756e-22	0.63535	0.223	0.037	3.47461e-18	Astrocyte	SIDT1
106	9.9502e-06	0.631461	0.501	0.494	0.28164	Astrocyte	CCDC14
107	5.61787e-14	0.630432	0.491	0.34	1.59014e-09	Astrocyte	SMAD9
108	9.41043e-15	0.627519	0.696	0.72	2.66362e-10	Astrocyte	ATP9A
109	6.31668e-08	0.627341	0.725	0.754	0.00178794	Astrocyte	TENM4
110	1.8708e-18	0.620153	0.822	0.825	5.2953e-14	Astrocyte	MAPT
111	1.78819e-17	0.619874	0.239	0.071	5.06148e-13	Astrocyte	ARHGAP6
112	1.80963e-23	0.619548	0.867	0.888	5.12215e-19	Astrocyte	BICD1
113	1.40493e-11	0.619061	0.49	0.364	3.97664e-07	Astrocyte	GMPR
114	1.80479e-06	0.617337	0.264	0.179	0.0510846	Astrocyte	SHTN1
115	1.81158e-07	0.610188	0.323	0.222	0.00512768	Astrocyte	DSCAM
116	2.4593e-05	0.610185	0.424	0.386	0.696105	Astrocyte	HSPB8
117	0.000181401	0.610096	0.41	0.375	1	Astrocyte	HIP1
118	1.80397e-08	0.60882	0.466	0.379	0.000510614	Astrocyte	ADAMTS9
119	1.4833e-10	0.60365	0.358	0.224	4.19848e-06	Astrocyte	MYO16
120	3.12647e-10	0.603466	0.347	0.222	8.84949e-06	Astrocyte	MOB3B
121	1.80847e-15	0.602107	0.33	0.155	5.11886e-11	Astrocyte	OSBPL3
122	6.16585e-08	0.59813	0.647	0.591	0.00174524	Astrocyte	AQP1
123	1.61604e-09	0.596027	0.359	0.228	4.5742e-05	Astrocyte	MAML3
124	1.51911e-19	0.594935	0.226	0.05	4.29983e-15	Astrocyte	CYP4F3
125	6.95582e-13	0.593531	0.274	0.125	1.96885e-08	Astrocyte	GUCY1A1
126	1.93281e-17	0.591666	0.282	0.104	5.47081e-13	Astrocyte	PIRT
127	2.57508e-09	0.591457	0.532	0.455	7.28876e-05	Astrocyte	ZDHHC14
128	1.65628e-16	0.586606	0.211	0.056	4.6881e-12	Astrocyte	MYO5C
129	2.06718e-06	0.584699	0.687	0.748	0.0585116	Astrocyte	RNF19A
130	4.97321e-14	0.582333	0.161	0.035	1.40767e-09	Astrocyte	SORCS3
131	4.9864e-14	0.582272	0.754	0.748	1.4114e-09	Astrocyte	WDR49
132	3.10593e-10	0.581907	0.738	0.694	8.79134e-06	Astrocyte	FRMD5
133	2.91316e-11	0.577954	0.356	0.222	8.2457e-07	Astrocyte	EXPH5
134	1.39056e-16	0.575361	0.146	0.015	3.93597e-12	Astrocyte	CP
135	1.02885e-07	0.570637	0.242	0.14	0.00291215	Astrocyte	CREB5
136	5.04106e-14	0.567812	0.789	0.81	1.42687e-09	Astrocyte	CERS6
137	1.41782e-05	0.563128	0.201	0.127	0.401314	Astrocyte	RFTN1
138	4.29739e-32	0.553887	0.989	0.972	1.21638e-27	Astrocyte	DPP10
139	2.68884e-12	0.547762	0.264	0.125	7.61077e-08	Astrocyte	GRIA3
140	4.20679e-06	0.546807	0.571	0.571	0.119073	Astrocyte	SLC20A2
141	5.95347e-10	0.544225	0.663	0.675	1.68513e-05	Astrocyte	CASK
142	0.000106739	0.542483	0.189	0.125	1	Astrocyte	ATRNL1
143	3.13221e-08	0.541045	0.735	0.785	0.000886572	Astrocyte	RGMA
144	4.84069e-07	0.533432	0.293	0.194	0.0137016	Astrocyte	AC007563.2
145	2.54496e-08	0.53341	0.64	0.662	0.000720352	Astrocyte	WNK2
146	6.39685e-11	0.530677	0.264	0.134	1.81063e-06	Astrocyte	FREM1
147	5.44789e-06	0.529291	0.158	0.084	0.154203	Astrocyte	DSCAML1
148	1.50134e-08	0.528838	0.468	0.358	0.000424954	Astrocyte	LRFN5
149	1.66124e-06	0.524339	0.117	0.047	0.0470213	Astrocyte	ZNF536
150	3.24471e-05	0.518461	0.49	0.476	0.918416	Astrocyte	TIAM1
151	2.74388e-05	0.516514	0.396	0.349	0.776656	Astrocyte	PRKX
152	3.82949e-06	0.516165	0.141	0.069	0.108394	Astrocyte	SH3GL3
153	8.68166e-13	0.513433	0.14	0.028	2.45734e-08	Astrocyte	PLCXD3
154	5.18782e-06	0.512825	0.528	0.472	0.146841	Astrocyte	GRIP1
155	0.000387646	0.508575	0.141	0.086	1	Astrocyte	FRMD4B
156	4.57542e-05	0.507832	0.115	0.056	1	Astrocyte	MOBP
157	0.000279752	0.506532	0.251	0.194	1	Astrocyte	WDR45
158	3.17379e-11	0.506343	0.709	0.651	8.98341e-07	Astrocyte	L3MBTL4
159	8.28621e-07	0.505294	0.76	0.826	0.0234541	Astrocyte	NPAS2
160	0.00106913	0.505015	0.159	0.106	1	Astrocyte	PDE1C
161	3.84675e-09	0.501723	0.205	0.097	0.000108882	Astrocyte	SYNM
162	4.1513e-07	0.499127	0.493	0.418	0.0117503	Astrocyte	DENND2A
163	1.40516e-07	0.496564	0.236	0.136	0.00397731	Astrocyte	SORBS2
164	1.8981e-05	0.496243	0.642	0.614	0.537256	Astrocyte	ANGPT1
165	2.11431e-05	0.496044	0.31	0.243	0.598456	Astrocyte	GYG2
166	0.000205027	0.49289	0.215	0.149	1	Astrocyte	ARMC3
167	6.12839e-10	0.489679	0.156	0.052	1.73464e-05	Astrocyte	CLVS1
168	0.000160408	0.487612	0.719	0.735	1	Astrocyte	CACNA2D3
169	4.32995e-08	0.484759	0.411	0.304	0.00122559	Astrocyte	ABI3BP
170	0.00267636	0.48437	0.488	0.502	1	Astrocyte	AC006059.1
171	0.00259581	0.482383	0.477	0.47	1	Astrocyte	PPM1E
172	6.78698e-08	0.480121	0.273	0.164	0.00192105	Astrocyte	SH3GL2
173	0.00113555	0.478678	0.521	0.498	1	Astrocyte	ARHGEF3
174	5.72739e-11	0.477312	0.344	0.211	1.62114e-06	Astrocyte	GFPT2
175	8.51449e-12	0.476813	0.798	0.826	2.41003e-07	Astrocyte	NAV1
176	7.0803e-05	0.476413	0.416	0.379	1	Astrocyte	RHPN1
177	6.13942e-05	0.471744	0.648	0.709	1	Astrocyte	AHNAK
178	1.12636e-18	0.470524	0.918	0.972	3.18817e-14	Astrocyte	ARHGEF4
179	1.48232e-05	0.462969	0.333	0.256	0.41957	Astrocyte	B3GAT2
180	8.05725e-09	0.462939	0.769	0.836	0.000228061	Astrocyte	ADCY8
181	4.50409e-09	0.462686	0.221	0.112	0.000127488	Astrocyte	AGPAT4
182	9.03044e-12	0.459804	0.151	0.039	2.55607e-07	Astrocyte	CYP4F12
183	0.00246885	0.454514	0.766	0.841	1	Astrocyte	HMGB1
184	1.90247e-06	0.44987	0.695	0.741	0.0538495	Astrocyte	ADRA1A
185	8.08643e-17	0.443138	0.177	0.03	2.28886e-12	Astrocyte	ITGA2
186	0.000934503	0.437965	0.17	0.118	1	Astrocyte	TMEFF2
187	5.27437e-07	0.437829	0.205	0.114	0.0149291	Astrocyte	GAS7
188	3.69268e-05	0.434112	0.531	0.491	1	Astrocyte	SYTL4
189	1.03016e-09	0.433523	0.766	0.662	2.91586e-05	Astrocyte	GPC6
190	8.36973e-05	0.43119	0.429	0.386	1	Astrocyte	PADI2
191	2.62492e-07	0.430031	0.172	0.084	0.00742983	Astrocyte	GPR158
192	1.08538e-05	0.42942	0.6	0.608	0.307216	Astrocyte	SLC16A9
193	4.06556e-06	0.428516	0.654	0.668	0.115076	Astrocyte	SERPINI2
194	0.00195881	0.426884	0.683	0.772	1	Astrocyte	ZFP36L1
195	1.1128e-06	0.426832	0.697	0.741	0.0314979	Astrocyte	NFIX
196	8.23888e-14	0.426804	0.933	0.985	2.33201e-09	Astrocyte	DCLK2
197	0.0030044	0.42423	0.57	0.608	1	Astrocyte	ECE1
198	0.000976976	0.424173	0.547	0.571	1	Astrocyte	SGK1
199	0.00674567	0.42306	0.335	0.31	1	Astrocyte	PKP4
200	1.1373e-06	0.422863	0.228	0.138	0.0321912	Astrocyte	RETREG1
201	4.73261e-05	0.421417	0.332	0.261	1	Astrocyte	AP001347.1
202	1.5759e-11	0.414951	0.898	0.944	4.46059e-07	Astrocyte	ABR
203	1.05765e-05	0.413683	0.631	0.569	0.299369	Astrocyte	SYNPO2
204	0.00288833	0.411885	0.597	0.664	1	Astrocyte	RGS12
205	1.89397e-06	0.408694	0.194	0.106	0.053609	Astrocyte	NTN1
206	1.37492e-07	0.408668	0.174	0.082	0.0038917	Astrocyte	RCAN2
207	6.34735e-07	0.407215	0.117	0.043	0.0179662	Astrocyte	ANO4
208	0.00950239	0.406642	0.413	0.41	1	Astrocyte	RYR1
209	0.00287463	0.404422	0.573	0.612	1	Astrocyte	WDR11-AS1
210	1.03417e-10	0.403997	0.136	0.034	2.92723e-06	Astrocyte	AC079298.3
211	0.000615038	0.403663	0.672	0.733	1	Astrocyte	AL139260.1
212	5.12045e-06	0.40328	0.401	0.325	0.144934	Astrocyte	CSMD3
213	0.000745932	0.401578	0.725	0.828	1	Astrocyte	ZBTB16
214	0.000435615	0.399534	0.705	0.763	1	Astrocyte	CAMK1D
215	8.20141e-08	0.39904	0.826	0.83	0.00232141	Astrocyte	DLGAP1
216	1.4012e-07	0.397612	0.309	0.203	0.0039661	Astrocyte	PRTG
217	0.00191017	0.396427	0.317	0.274	1	Astrocyte	PRPSAP1
218	0.000715172	0.396233	0.584	0.621	1	Astrocyte	APP
219	0.000146183	0.395084	0.733	0.795	1	Astrocyte	ENSA
220	4.38134e-08	0.394763	0.319	0.201	0.00124014	Astrocyte	PTPRE
221	0.00168627	0.394336	0.218	0.16	1	Astrocyte	AL445250.1
222	3.22726e-05	0.392891	0.716	0.78	0.913476	Astrocyte	ANTXR1
224	0.000834686	0.390567	0.659	0.722	1	Astrocyte	PLEC
225	0.00289977	0.390047	0.356	0.323	1	Astrocyte	CXXC5
226	0.000286301	0.389824	0.239	0.172	1	Astrocyte	CRISPLD1
227	0.000745296	0.389034	0.661	0.716	1	Astrocyte	HYDIN
228	2.12183e-06	0.386583	0.401	0.306	0.0600585	Astrocyte	ABCC4
229	2.74028e-06	0.383467	0.784	0.866	0.0775635	Astrocyte	MAP7
230	0.00325735	0.379959	0.158	0.114	1	Astrocyte	LDB2
231	3.38162e-15	0.379871	0.148	0.021	9.57167e-11	Astrocyte	TMCC3
232	1.94996e-06	0.37986	0.764	0.8	0.0551937	Astrocyte	AKAP6
233	2.01766e-10	0.379726	0.909	0.951	5.71099e-06	Astrocyte	ITPKB
234	0.0022101	0.378642	0.137	0.091	1	Astrocyte	RAPGEF5
235	0.000380993	0.375615	0.118	0.065	1	Astrocyte	KCNH8
236	0.00238799	0.375361	0.538	0.56	1	Astrocyte	INPP4A
237	4.20749e-17	0.374657	0.977	0.998	1.19093e-12	Astrocyte	SORBS1
238	0.000823795	0.373504	0.639	0.677	1	Astrocyte	LTBP1
239	4.5274e-06	0.373275	0.148	0.075	0.128148	Astrocyte	SLCO1A2
240	2.62724e-08	0.372081	0.92	0.979	0.000743641	Astrocyte	GPM6B
241	3.20696e-05	0.371987	0.215	0.142	0.907731	Astrocyte	EPB41L3
242	1.7871e-08	0.371942	0.931	0.983	0.000505839	Astrocyte	MAML2
243	0.00408465	0.370925	0.492	0.506	1	Astrocyte	SSBP3
244	0.000416198	0.370851	0.326	0.269	1	Astrocyte	SNORC
245	0.00781285	0.370746	0.531	0.562	1	Astrocyte	SLC22A15
246	0.000255662	0.367203	0.398	0.349	1	Astrocyte	B3GALT5
247	1.06792e-07	0.366228	0.198	0.101	0.00302275	Astrocyte	AR
248	0.00758019	0.363756	0.423	0.42	1	Astrocyte	AGFG2
249	6.22462e-12	0.363423	0.931	0.968	1.76188e-07	Astrocyte	PDE4DIP
250	0.00184316	0.361663	0.271	0.226	1	Astrocyte	CLTCL1
251	3.10062e-05	0.361474	0.241	0.164	0.87763	Astrocyte	SRPX
252	5.35999e-06	0.361182	0.752	0.828	0.151715	Astrocyte	ITGB4
253	7.12387e-08	0.360525	0.147	0.058	0.00201641	Astrocyte	ITGBL1
254	6.48591e-05	0.357643	0.315	0.25	1	Astrocyte	P2RX7
255	0.00280864	0.357209	0.62	0.681	1	Astrocyte	DPYSL3
256	1.24636e-09	0.356797	0.12	0.03	3.52781e-05	Astrocyte	ARHGAP10
257	0.00216813	0.356462	0.459	0.444	1	Astrocyte	RASL12
258	6.66982e-05	0.35428	0.296	0.224	1	Astrocyte	KITLG
259	0.00722995	0.353608	0.32	0.285	1	Astrocyte	SAMD12
260	0.000248526	0.350579	0.197	0.131	1	Astrocyte	CASC15
261	4.15177e-12	0.348092	0.118	0.017	1.17516e-07	Astrocyte	ABCA8
262	0.0050418	0.346113	0.385	0.36	1	Astrocyte	SEMA3B
263	0.00272287	0.345577	0.599	0.642	1	Astrocyte	AL645568.1
264	3.34523e-05	0.345325	0.247	0.172	0.946867	Astrocyte	SRGAP2
265	1.14408e-05	0.345208	0.113	0.049	0.323831	Astrocyte	EPHA5
266	0.00184943	0.344825	0.333	0.278	1	Astrocyte	FAP
267	5.00515e-06	0.344602	0.214	0.127	0.141671	Astrocyte	EGF
268	6.73618e-06	0.344503	0.179	0.099	0.190667	Astrocyte	ADCY1
269	0.000198371	0.34401	0.172	0.108	1	Astrocyte	NOS1AP
270	0.000246949	0.342837	0.741	0.83	1	Astrocyte	ZNF609
271	0.00124142	0.341756	0.137	0.09	1	Astrocyte	KSR2
272	0.00177244	0.340633	0.696	0.767	1	Astrocyte	NALCN
273	7.36113e-09	0.339688	0.121	0.034	0.000208357	Astrocyte	TMEM132E
274	0.00252909	0.339421	0.269	0.222	1	Astrocyte	AC106869.1
275	8.45769e-05	0.338752	0.175	0.106	1	Astrocyte	MAN1A1
276	0.000204875	0.338615	0.263	0.196	1	Astrocyte	PPM1H
277	0.00173942	0.336821	0.746	0.834	1	Astrocyte	KIAA1671
278	0.00645381	0.332914	0.802	0.83	1	Astrocyte	AQP4-AS1
279	7.94524e-09	0.331378	0.152	0.056	0.00022489	Astrocyte	CALCRL
280	2.09082e-05	0.331212	0.765	0.787	0.591807	Astrocyte	ST6GALNAC3
281	0.000122036	0.330513	0.207	0.138	1	Astrocyte	GXYLT2
282	0.00535364	0.330084	0.129	0.088	1	Astrocyte	FAM107B
283	1.035e-05	0.32846	0.147	0.075	0.292957	Astrocyte	JHY
284	0.00414831	0.324202	0.321	0.267	1	Astrocyte	BNC2
285	0.00248168	0.322039	0.202	0.149	1	Astrocyte	SEZ6L
286	2.22658e-12	0.322002	0.11	0.011	6.30234e-08	Astrocyte	F5
287	0.00307569	0.320553	0.208	0.162	1	Astrocyte	PDZD4
288	0.00655263	0.320144	0.167	0.123	1	Astrocyte	SEMA5A
289	0.00336877	0.316593	0.364	0.315	1	Astrocyte	UST
290	0.000103717	0.315494	0.215	0.142	1	Astrocyte	FRMPD3
291	4.42532e-10	0.314088	0.147	0.045	1.25259e-05	Astrocyte	RHOBTB1
292	0.00414533	0.313605	0.228	0.183	1	Astrocyte	DISP3
293	0.00149257	0.311561	0.263	0.207	1	Astrocyte	KIAA1549L
294	3.66961e-10	0.31118	0.124	0.03	1.03868e-05	Astrocyte	NT5DC3
295	4.07865e-06	0.309763	0.844	0.881	0.115446	Astrocyte	PLXDC2
296	0.00206415	0.307738	0.188	0.136	1	Astrocyte	FAM189A1
297	2.49084e-08	0.307689	0.101	0.024	0.000705031	Astrocyte	AC007221.2
298	0.00046935	0.306778	0.151	0.093	1	Astrocyte	SCN1A
299	2.85695e-05	0.305566	0.167	0.095	0.808659	Astrocyte	KLHL29
300	2.99062e-09	0.30467	0.198	0.086	8.46495e-05	Astrocyte	MIR9-3HG
301	0.00686554	0.301645	0.709	0.823	1	Astrocyte	ANKRD11
302	1.24454e-05	0.299311	0.108	0.045	0.352267	Astrocyte	HECW2
303	0.000654399	0.298959	0.194	0.134	1	Astrocyte	LINC00632
304	0.000470895	0.29789	0.768	0.86	1	Astrocyte	SLC9A9
305	7.4944e-06	0.297863	0.115	0.049	0.212129	Astrocyte	VRK2
306	2.69599e-12	0.297615	0.966	1	7.63101e-08	Astrocyte	NEBL
307	0.000351786	0.29689	0.118	0.065	1	Astrocyte	LINC00320
308	1.25736e-08	0.290544	0.958	0.987	0.000355895	Astrocyte	NAV2
309	4.14476e-05	0.289895	0.192	0.118	1	Astrocyte	TSPAN18
310	1.8161e-07	0.289578	0.139	0.056	0.00514048	Astrocyte	ARHGAP18
311	0.00186769	0.288877	0.15	0.228	1	Astrocyte	TUBA1B
312	0.000513486	0.288809	0.767	0.873	1	Astrocyte	GAN
313	3.86776e-10	0.28755	0.179	0.067	1.09477e-05	Astrocyte	ECM2
314	2.11157e-07	0.286099	0.114	0.037	0.00597681	Astrocyte	FAM196B
315	0.000206375	0.285732	0.739	0.789	1	Astrocyte	RFX2
316	4.06085e-09	0.284863	0.114	0.028	0.000114942	Astrocyte	KIT
317	0.000962965	0.281289	0.102	0.056	1	Astrocyte	PRICKLE1
318	3.42034e-07	0.280551	0.129	0.05	0.00968127	Astrocyte	ARRDC4
319	0.000884904	0.280166	0.152	0.097	1	Astrocyte	SLC7A5
320	6.66034e-07	0.273865	0.19	0.099	0.0188521	Astrocyte	SLITRK5
321	0.00122522	0.27378	0.714	0.771	1	Astrocyte	ABCA1
322	0.00992137	0.272592	0.694	0.797	1	Astrocyte	PRKCE
323	0.000177972	0.267643	0.121	0.065	1	Astrocyte	AC097658.2
324	0.00253522	0.266348	0.135	0.088	1	Astrocyte	HSPA1B
325	0.00141819	0.265115	0.169	0.256	1	Astrocyte	YWHAG
326	0.00400733	0.264486	0.125	0.08	1	Astrocyte	PCSK6
327	0.00284162	0.263894	0.781	0.884	1	Astrocyte	TRIM2
328	0.000988399	0.262905	0.107	0.06	1	Astrocyte	SGSM1
329	1.04299e-05	0.257641	0.142	0.071	0.295219	Astrocyte	SAMD11
330	2.87179e-08	0.254805	0.157	0.062	0.00081286	Astrocyte	ACTN2
331	0.00382206	0.254322	0.15	0.103	1	Astrocyte	KLHL13
332	0.00148015	0.251695	0.159	0.106	1	Astrocyte	SEMA3D
333	0.00367762	0.251577	0.813	0.925	1	Astrocyte	AC245297.3
334	7.97762e-05	0.249324	0.115	0.056	1	Astrocyte	SLC6A9
335	0.00614161	0.249119	0.216	0.172	1	Astrocyte	KY
336	0.000140056	0.246666	0.171	0.104	1	Astrocyte	STAMBPL1
337	0.00721323	0.245934	0.104	0.067	1	Astrocyte	DOK6
338	0.000198109	0.245132	0.844	0.944	1	Astrocyte	DOCK3
339	2.92235e-07	0.243216	0.957	0.994	0.00827171	Astrocyte	ADCY2
340	0.000219869	0.239447	0.344	0.507	1	Astrocyte	PEBP1
341	0.00344098	0.237753	0.165	0.118	1	Astrocyte	RASGEF1A
342	0.00101415	0.236637	0.116	0.067	1	Astrocyte	PPFIBP1
343	8.57291e-05	0.232528	0.129	0.065	1	Astrocyte	AC092422.1
344	0.00560107	0.229958	0.161	0.116	1	Astrocyte	RGR
345	5.07918e-11	0.225917	0.981	0.998	1.43766e-06	Astrocyte	PPP2R2B
346	0.00024245	0.22487	0.943	0.994	1	Astrocyte	GLIS3
347	0.000659483	0.219876	0.906	0.983	1	Astrocyte	SLC39A11
348	0.000182961	0.219843	0.954	0.994	1	Astrocyte	TNRC6A
349	1.28041e-05	0.218621	0.134	0.063	0.36242	Astrocyte	PI16
350	4.35674e-06	0.218327	0.277	0.174	0.123318	Astrocyte	STK32A
351	0.00450853	0.210223	0.252	0.36	1	Astrocyte	APOO
352	0.00481121	0.208445	0.166	0.119	1	Astrocyte	PCP4
353	0.00141507	0.202228	0.919	0.981	1	Astrocyte	RFX4
354	0.00261266	0.201439	0.136	0.088	1	Astrocyte	CABCOCO1
355	0.00221701	0.196314	0.115	0.069	1	Astrocyte	RNF175
356	0.00969781	0.195157	0.333	0.455	1	Astrocyte	DOCK9
357	0.000610438	0.194727	0.134	0.078	1	Astrocyte	AC008667.1
358	0.000324667	0.189867	0.969	0.998	1	Astrocyte	WWOX
359	0.0040868	0.189436	0.146	0.097	1	Astrocyte	AL355974.2
360	0.00016505	0.186052	0.103	0.049	1	Astrocyte	KCNQ1OT1
361	0.00516195	0.18359	0.156	0.112	1	Astrocyte	PLIN1
362	0.00930499	0.175721	0.87	0.965	1	Astrocyte	ASTN2
363	0.00401734	0.171406	0.942	0.978	1	Astrocyte	CNTN1
364	0.00303388	0.171387	0.162	0.239	1	Astrocyte	PPIA
365	0.00658	0.165288	0.113	0.073	1	Astrocyte	NFIA-AS2
366	0.00430168	0.163601	0.123	0.078	1	Astrocyte	SORD
367	0.000789844	0.158119	0.136	0.08	1	Astrocyte	AL139383.1
368	0.000369868	0.149143	0.109	0.183	1	Astrocyte	CELF4
369	0.00558959	0.148851	0.219	0.313	1	Astrocyte	ARFGEF3
370	0.00938923	0.147647	0.306	0.422	1	Astrocyte	ERGIC1
371	0.00286966	0.145874	0.108	0.063	1	Astrocyte	UNC5B
372	0.000103361	0.145847	0.956	0.993	1	Astrocyte	FMN2
373	0.00845373	0.144993	0.127	0.188	1	Astrocyte	RPL15
374	0.00806197	0.130571	0.186	0.267	1	Astrocyte	PPP2R1A
375	1.15965e-07	0.128862	0.297	0.487	0.00328238	Astrocyte	CAMK2N1
376	0.00150313	0.128182	0.338	0.468	1	Astrocyte	PMP2
377	0.000421184	0.122659	0.395	0.552	1	Astrocyte	LUC7L
378	0.00530595	0.122064	0.332	0.45	1	Astrocyte	YWHAZ
379	0.000292349	0.121516	0.064	0.121	1	Astrocyte	NEFM
380	0.00977497	0.120515	0.359	0.498	1	Astrocyte	NPRL3
381	0.00315398	0.119508	0.401	0.552	1	Astrocyte	ARL3
382	1.26642e-05	0.118191	0.186	0.31	0.358459	Astrocyte	CLMN
383	0.00541602	0.11385	0.079	0.129	1	Astrocyte	CEBPB
384	0.00915591	0.113638	0.293	0.394	1	Astrocyte	MYH14
385	2.68653e-05	0.11119	0.169	0.278	0.760423	Astrocyte	CFL1
386	0.00844262	0.110868	0.249	0.343	1	Astrocyte	RAB11A
387	0.00464654	0.109996	0.416	0.571	1	Astrocyte	PPP2R5E
389	0.00407669	0.106902	0.348	0.472	1	Astrocyte	MRPL41
390	0.00876861	0.106876	0.249	0.343	1	Astrocyte	SYNGR1
391	0.00031431	0.106822	0.4	0.569	1	Astrocyte	ADCY9
392	0.00286707	0.106491	0.542	0.737	1	Astrocyte	RTN4
393	0.00882946	0.106194	0.198	0.276	1	Astrocyte	TPT1
394	0.00601765	0.106187	0.372	0.498	1	Astrocyte	SLC25A43
395	0.000974157	0.105501	0.447	0.636	1	Astrocyte	CDC42EP4
396	0.00583711	0.105408	0.264	0.366	1	Astrocyte	ADGRL1
397	0.00591991	0.105114	0.149	0.215	1	Astrocyte	AP2M1
398	0.00530871	0.104603	0.33	0.45	1	Astrocyte	SLC44A2
399	0.00010571	0.104081	0.241	0.366	1	Astrocyte	TECR
400	0.00418741	0.10364	0.269	0.379	1	Astrocyte	SCN8A
401	0.00189408	0.103484	0.408	0.55	1	Astrocyte	PIP5K1A
402	0.00472939	0.102886	0.243	0.34	1	Astrocyte	HSPA9
403	0.00498837	0.101828	0.404	0.554	1	Astrocyte	ZSCAN5A
404	0.00174332	0.100806	0.191	0.285	1	Astrocyte	DNAJC17
405	3.44321e-139	1.76493	0.854	0.2	9.746e-135	NSC	CABLES1
406	8.18169e-77	1.62737	0.653	0.203	2.31583e-72	NSC	LINC00499
407	2.561e-119	1.43842	1	0.937	7.24892e-115	NSC	SLC1A2
408	7.91001e-97	1.42299	0.84	0.295	2.23893e-92	NSC	ARHGAP24
409	2.40066e-119	1.2009	0.998	0.864	6.79508e-115	NSC	NRXN1
410	3.55711e-78	1.15602	0.938	0.571	1.00684e-73	NSC	CACNB2
411	1.6473e-68	1.12334	0.771	0.326	4.66268e-64	NSC	LRRC3B
412	3.56033e-70	1.08664	0.856	0.457	1.00775e-65	NSC	GNA14
413	1.22518e-66	1.04213	0.854	0.411	3.46788e-62	NSC	EPHA6
414	3.78687e-52	1.03931	0.629	0.236	1.07187e-47	NSC	AF279873.3
415	1.12774e-72	1.03278	0.875	0.435	3.19208e-68	NSC	GLUL
416	2.41639e-65	1.02172	0.649	0.211	6.83959e-61	NSC	NRP1
417	3.88681e-78	1.02153	0.597	0.125	1.10016e-73	NSC	GRM3
418	7.06171e-63	1.00378	0.543	0.141	1.99882e-58	NSC	VAV3
419	7.54538e-36	0.997653	0.756	0.475	2.13572e-31	NSC	AL589740.1
420	9.12816e-66	0.983495	0.64	0.199	2.58372e-61	NSC	TMEM132C
421	6.2059e-109	0.967264	0.996	0.943	1.75658e-104	NSC	GPC5
422	3.30318e-67	0.96333	0.996	0.927	9.34965e-63	NSC	SLC1A3
423	4.071e-57	0.948219	0.815	0.422	1.1523e-52	NSC	COL5A3
424	6.22229e-54	0.91578	0.556	0.171	1.76122e-49	NSC	KCNQ3
425	6.80164e-43	0.914341	0.843	0.555	1.92521e-38	NSC	DNAH7
426	5.22253e-77	0.90217	0.996	0.875	1.47824e-72	NSC	CADM1
427	3.1688e-51	0.863508	0.791	0.42	8.96929e-47	NSC	SLCO1C1
428	3.06339e-36	0.86144	0.72	0.426	8.67091e-32	NSC	TPD52L1
429	1.99582e-63	0.859124	0.8	0.35	5.64918e-59	NSC	PTN
430	6.49507e-48	0.854981	0.328	0.056	1.83843e-43	NSC	RERG
431	8.95906e-49	0.851032	0.905	0.578	2.53586e-44	NSC	PLCB1
432	6.32276e-55	0.850133	0.606	0.209	1.78966e-50	NSC	COL11A1
433	1.76409e-66	0.847912	0.991	0.858	4.99327e-62	NSC	RNF219-AS1
434	6.11437e-73	0.844482	0.983	0.834	1.73067e-68	NSC	PREX2
435	2.08702e-57	0.808408	0.938	0.636	5.90731e-53	NSC	GLI3
436	1.69018e-34	0.797442	0.743	0.444	4.78404e-30	NSC	EGLN3
437	1.1223e-47	0.780678	0.965	0.791	3.17666e-43	NSC	SLC4A4
438	6.52079e-28	0.764744	0.644	0.369	1.84571e-23	NSC	MEIS2
439	8.1393e-52	0.761739	0.812	0.395	2.30383e-47	NSC	F11-AS1
440	9.03684e-46	0.758663	0.882	0.56	2.55788e-41	NSC	AC091826.2
441	3.25824e-45	0.754132	0.72	0.327	9.22244e-41	NSC	ADAMTS17
442	7.31463e-29	0.746633	0.869	0.656	2.07041e-24	NSC	AC002429.2
443	3.07975e-41	0.741202	0.668	0.306	8.71722e-37	NSC	TOX
444	1.83632e-31	0.741111	0.782	0.501	5.19771e-27	NSC	LRMDA
445	8.59321e-48	0.740784	0.614	0.227	2.43231e-43	NSC	RBMS3
446	9.69771e-43	0.737089	0.871	0.52	2.74494e-38	NSC	EPHB1
447	6.74023e-52	0.73695	0.989	0.907	1.90782e-47	NSC	NKAIN3
448	2.30065e-42	0.733317	0.89	0.563	6.51199e-38	NSC	BRINP3
449	7.52188e-40	0.730815	0.675	0.326	2.12907e-35	NSC	PDE3B
450	1.00767e-48	0.729531	0.974	0.791	2.8522e-44	NSC	NHSL1
451	6.15264e-38	0.721284	0.847	0.567	1.7415e-33	NSC	GABRA2
452	2.03543e-33	0.71993	0.7	0.384	5.76129e-29	NSC	F3
453	8.48843e-51	0.718724	0.815	0.428	2.40265e-46	NSC	MERTK
454	3.09631e-26	0.711317	0.524	0.258	8.76412e-22	NSC	FAM19A1
455	2.8284e-59	0.708011	0.979	0.767	8.0058e-55	NSC	CARMIL1
456	1.08433e-41	0.707744	0.875	0.605	3.06918e-37	NSC	LMO3
457	1.17834e-44	0.697938	0.868	0.546	3.33528e-40	NSC	ATP1B2
458	4.13415e-45	0.684092	0.955	0.719	1.17017e-40	NSC	STXBP5
459	1.70706e-52	0.68359	0.959	0.707	4.83184e-48	NSC	MAST4
460	6.28577e-47	0.678851	0.978	0.896	1.77919e-42	NSC	ADGRV1
461	1.62215e-50	0.655751	0.769	0.342	4.5915e-46	NSC	SH3RF1
462	1.09836e-75	0.650109	1	0.983	3.10891e-71	NSC	GPM6A
463	9.52025e-41	0.647565	0.903	0.584	2.69471e-36	NSC	DNM3
464	3.79975e-19	0.647503	0.341	0.149	1.07552e-14	NSC	MOXD1
465	7.68329e-52	0.63821	0.513	0.148	2.17476e-47	NSC	ETV1
466	1.21062e-35	0.635683	0.944	0.689	3.42667e-31	NSC	AC073050.1
467	1.4259e-39	0.635143	0.942	0.692	4.03602e-35	NSC	GLUD1
468	2.34873e-46	0.633099	0.382	0.083	6.64808e-42	NSC	AKAP12
469	3.56023e-36	0.631477	0.849	0.545	1.00772e-31	NSC	ETNPPL
470	1.15365e-63	0.630641	1	0.945	3.26541e-59	NSC	ADGRB3
471	2.68978e-69	0.627528	0.996	0.969	7.61343e-65	NSC	ERBB4
472	2.15736e-41	0.624453	0.78	0.4	6.1064e-37	NSC	SPRED1
473	4.71109e-47	0.623286	0.722	0.326	1.33347e-42	NSC	RHOJ
474	4.34389e-38	0.619079	0.685	0.333	1.22954e-33	NSC	DLC1
475	1.54309e-31	0.618077	0.909	0.649	4.36772e-27	NSC	RGS20
476	5.99194e-35	0.616351	0.871	0.587	1.69602e-30	NSC	ALDH1L1
477	1.24777e-27	0.613666	0.332	0.109	3.5318e-23	NSC	NR2F2-AS1
478	7.15068e-30	0.61275	0.646	0.328	2.024e-25	NSC	FSTL5
479	1.66932e-50	0.610843	0.576	0.2	4.72502e-46	NSC	GPAM
480	4.88813e-34	0.609794	0.672	0.336	1.38358e-29	NSC	SMURF2
481	1.12771e-41	0.60673	0.993	0.858	3.19198e-37	NSC	GABRB1
482	3.30079e-39	0.604768	0.825	0.514	9.34287e-35	NSC	FAM184A
483	3.67654e-42	0.604148	0.784	0.413	1.04064e-37	NSC	SLC15A2
484	1.61617e-39	0.602789	0.573	0.229	4.57457e-35	NSC	ME1
485	1.67785e-45	0.601101	0.716	0.334	4.74915e-41	NSC	OAF
486	6.51061e-11	0.596684	0.252	0.123	1.84283e-06	NSC	HPSE2
487	2.69702e-23	0.588453	0.407	0.179	7.63391e-19	NSC	MCF2L2
488	1.43789e-37	0.58603	0.972	0.82	4.06996e-33	NSC	OPHN1
489	1.54238e-40	0.585839	0.957	0.73	4.36572e-36	NSC	C1orf61
490	1.27369e-33	0.572237	0.823	0.461	3.60518e-29	NSC	ENOX1
491	3.15241e-25	0.570801	0.647	0.353	8.9229e-21	NSC	KCNMB2-AS1
492	2.11817e-30	0.568753	0.821	0.481	5.99547e-26	NSC	SLC35F1
493	6.61191e-25	0.561527	0.922	0.698	1.8715e-20	NSC	LRRC4C
494	5.24939e-37	0.560309	0.873	0.505	1.48584e-32	NSC	ALCAM
495	1.31194e-52	0.549425	0.39	0.074	3.71344e-48	NSC	DIO2
496	1.00025e-40	0.543229	0.556	0.209	2.83121e-36	NSC	ABCD2
497	6.9754e-42	0.541117	0.674	0.291	1.97439e-37	NSC	HTRA1
498	2.66507e-31	0.537092	0.864	0.536	7.54347e-27	NSC	RORB
499	5.00409e-39	0.536479	0.983	0.816	1.41641e-34	NSC	ASPH
500	1.41647e-32	0.535518	0.957	0.706	4.00931e-28	NSC	ZFHX4
501	3.06451e-34	0.535324	0.394	0.123	8.67409e-30	NSC	ENTPD1
502	1.97103e-47	0.534339	0.711	0.308	5.57901e-43	NSC	SLC1A4
503	3.41522e-20	0.533288	0.789	0.523	9.66679e-16	NSC	AC087564.1
504	5.19398e-29	0.529046	0.84	0.557	1.47016e-24	NSC	FAM171B
505	4.23403e-29	0.524334	0.746	0.411	1.19844e-24	NSC	NLGN4X
506	1.21134e-25	0.523848	0.282	0.084	3.4287e-21	NSC	AC090993.1
507	1.43263e-27	0.522685	0.685	0.387	4.05505e-23	NSC	PIK3C2A
508	7.45829e-43	0.517774	0.625	0.253	2.11107e-38	NSC	EDNRB
509	1.59964e-18	0.510556	0.845	0.619	4.52779e-14	NSC	MACROD2
510	3.08809e-32	0.510523	0.767	0.44	8.74083e-28	NSC	GARNL3
511	2.51752e-32	0.50951	0.317	0.083	7.12584e-28	NSC	SPRY4-AS1
512	1.97398e-42	0.508755	1	0.923	5.58734e-38	NSC	ADGRL3
513	1.79835e-15	0.506188	0.41	0.214	5.09022e-11	NSC	SLC8A1
514	3.37262e-28	0.505566	0.849	0.561	9.5462e-24	NSC	LGR4
515	6.2312e-34	0.500195	0.485	0.188	1.76374e-29	NSC	PTCH1
516	1.05106e-25	0.499089	0.927	0.722	2.97503e-21	NSC	NEO1
517	3.21748e-24	0.497106	0.854	0.6	9.10709e-20	NSC	MEF2C-AS1
518	3.71315e-25	0.492083	0.769	0.468	1.05101e-20	NSC	NOL4
519	3.13395e-30	0.49048	0.726	0.398	8.87065e-26	NSC	GPD2
520	8.23228e-24	0.489495	0.371	0.142	2.33015e-19	NSC	HS3ST5
521	1.12588e-28	0.487818	0.804	0.483	3.1868e-24	NSC	EPB41L2
522	7.50222e-31	0.486462	0.772	0.462	2.1235e-26	NSC	ASAP2
523	4.27423e-32	0.484962	0.621	0.312	1.20982e-27	NSC	UGP2
524	1.01756e-32	0.484883	0.983	0.825	2.88021e-28	NSC	SYNE1
525	6.34375e-36	0.483391	0.175	0.01	1.7956e-31	NSC	WIF1
526	1.47865e-27	0.483088	0.748	0.429	4.18533e-23	NSC	ADGRG1
527	1.13375e-38	0.482559	0.457	0.149	3.20907e-34	NSC	AL365273.2
528	5.69771e-31	0.476895	0.989	0.865	1.61274e-26	NSC	PTPRZ1
529	3.73498e-24	0.476622	0.882	0.628	1.05718e-19	NSC	ESRRG
530	8.30516e-29	0.475031	0.866	0.566	2.35078e-24	NSC	RALGAPA2
531	2.46366e-19	0.474922	0.929	0.779	6.97339e-15	NSC	TENM2
532	2.32421e-27	0.474487	0.965	0.79	6.57867e-23	NSC	LINC00461
533	8.56502e-28	0.47143	0.912	0.655	2.42433e-23	NSC	LINC00511
534	2.53876e-48	0.470442	1	0.991	7.18597e-44	NSC	PCDH9
535	2.07849e-30	0.46928	0.938	0.707	5.88316e-26	NSC	ITSN1
536	4.90389e-44	0.465958	0.998	0.973	1.38805e-39	NSC	LRP1B
537	1.25418e-28	0.465118	0.873	0.574	3.54995e-24	NSC	GRAMD1C
538	1.2074e-27	0.464765	0.922	0.655	3.41755e-23	NSC	PON2
539	2.11115e-22	0.463603	0.806	0.507	5.97562e-18	NSC	SHROOM3
540	2.41948e-30	0.457818	0.996	0.918	6.84835e-26	NSC	TNIK
541	3.29427e-25	0.456014	0.399	0.157	9.32444e-21	NSC	AC115622.1
542	2.06007e-12	0.453953	0.328	0.171	5.83102e-08	NSC	AC098829.1
543	4.67792e-24	0.453169	0.593	0.32	1.32409e-19	NSC	CYB5B
544	4.46157e-35	0.448676	0.7	0.332	1.26285e-30	NSC	UNC5C
545	2.80156e-29	0.446663	0.733	0.409	7.92981e-25	NSC	C2orf72
546	1.615e-19	0.445351	0.828	0.577	4.57127e-15	NSC	EYA1
547	4.12884e-20	0.443229	0.289	0.108	1.16867e-15	NSC	AC079760.1
548	8.4835e-30	0.441548	0.524	0.222	2.40126e-25	NSC	EPHA4
549	8.57948e-62	0.441388	1	0.993	2.42842e-57	NSC	LSAMP
550	1.56398e-25	0.44088	0.881	0.596	4.42685e-21	NSC	CDH2
551	1.88871e-25	0.440726	0.84	0.517	5.346e-21	NSC	STOX1
552	7.88089e-23	0.437013	0.927	0.687	2.23069e-18	NSC	PCDH7
553	3.16723e-25	0.434306	0.856	0.572	8.96485e-21	NSC	CEP85L
554	1.1233e-24	0.432822	0.815	0.521	3.1795e-20	NSC	PLEKHG1
555	4.11533e-22	0.431947	0.388	0.16	1.16485e-17	NSC	BICC1
556	2.74365e-27	0.429692	0.972	0.825	7.7659e-23	NSC	ITPR2
557	2.62738e-15	0.429162	0.916	0.763	7.43681e-11	NSC	SGCD
558	5.70558e-30	0.427838	0.604	0.287	1.61496e-25	NSC	CD47
559	2.39342e-25	0.425801	0.386	0.148	6.77459e-21	NSC	XAF1
560	4.33766e-15	0.4232	0.718	0.508	1.22777e-10	NSC	UBA6-AS1
561	6.16027e-25	0.422458	0.849	0.582	1.74366e-20	NSC	INTU
562	1.55916e-23	0.421887	0.922	0.722	4.41319e-19	NSC	CPEB4
563	9.4907e-19	0.421467	0.868	0.646	2.68634e-14	NSC	C1orf21
564	1.09753e-26	0.418964	0.996	0.928	3.10655e-22	NSC	AC092691.1
565	1.46037e-12	0.418761	0.192	0.073	4.13357e-08	NSC	AC007402.1
566	2.64959e-35	0.418212	1	0.965	7.49965e-31	NSC	CADM2
567	6.20328e-28	0.417784	0.61	0.293	1.75584e-23	NSC	MGLL
568	9.96094e-28	0.416631	0.937	0.671	2.81944e-23	NSC	ACSBG1
569	1.05374e-17	0.416396	0.392	0.195	2.98262e-13	NSC	KBTBD12
570	4.22666e-39	0.41609	0.996	0.943	1.19636e-34	NSC	SOX5
571	8.9314e-22	0.416008	0.854	0.608	2.52803e-17	NSC	CPEB3
572	4.08202e-23	0.414964	0.785	0.492	1.15542e-18	NSC	OSBPL6
573	1.3779e-27	0.414694	0.282	0.075	3.90015e-23	NSC	LINC02328
574	2.65029e-21	0.414511	0.836	0.56	7.50163e-17	NSC	MRVI1
575	8.48759e-28	0.41239	0.832	0.51	2.40241e-23	NSC	OLFM2
576	1.15221e-25	0.410895	0.612	0.317	3.26132e-21	NSC	ELOVL2
577	1.06553e-23	0.410739	0.709	0.409	3.01597e-19	NSC	WDR17
578	8.07356e-25	0.410301	0.623	0.321	2.28522e-20	NSC	SLC6A11
579	9.9007e-29	0.409134	0.884	0.578	2.80239e-24	NSC	2021-09-07
580	6.98557e-22	0.408762	0.976	0.824	1.97727e-17	NSC	ZSWIM6
581	8.91389e-36	0.408509	0.414	0.132	2.52308e-31	NSC	TUBB2B
582	3.32881e-22	0.407677	0.881	0.605	9.42221e-18	NSC	ABI1
583	3.63776e-13	0.405071	0.707	0.486	1.02967e-08	NSC	AC010099.4
584	2.18567e-21	0.402616	0.381	0.162	6.18655e-17	NSC	FREM2
585	1.4685e-20	0.401915	0.922	0.666	4.15658e-16	NSC	FGD4
586	9.85996e-16	0.400256	0.653	0.404	2.79086e-11	NSC	CPNE8
587	6.23903e-29	0.400076	0.853	0.516	1.76596e-24	NSC	GRIA2
588	1.52947e-23	0.399962	0.871	0.591	4.32917e-19	NSC	FGFR3
589	3.72845e-26	0.398327	0.368	0.128	1.05534e-21	NSC	CC2D2B
590	8.23032e-16	0.39755	0.929	0.82	2.32959e-11	NSC	SPARCL1
591	2.9313e-19	0.395496	0.957	0.806	8.29704e-15	NSC	DGKG
592	2.46811e-30	0.392246	0.597	0.278	6.98599e-26	NSC	PDGFRB
593	3.96186e-20	0.391537	0.965	0.843	1.1214e-15	NSC	BMPR1B
594	2.66956e-27	0.390739	0.769	0.458	7.55619e-23	NSC	CHKA
595	5.5805e-22	0.390667	0.989	0.891	1.57956e-17	NSC	CPE
596	1.47779e-22	0.390221	0.356	0.135	4.18287e-18	NSC	PSMA1
597	2.30317e-28	0.389888	0.634	0.311	6.51914e-24	NSC	GRIN2C
598	2.8472e-19	0.386522	0.92	0.713	8.05901e-15	NSC	ARHGEF12
599	2.37014e-31	0.386096	1	0.976	6.70869e-27	NSC	RORA
600	3.87119e-25	0.385782	0.507	0.235	1.09574e-20	NSC	SAT1
601	1.01515e-16	0.385734	0.825	0.576	2.87337e-12	NSC	TMEM108
602	9.93457e-14	0.385609	0.897	0.696	2.81198e-09	NSC	SAMD4A
603	3.74451e-24	0.385354	0.782	0.481	1.05988e-19	NSC	MYO10
604	6.89738e-20	0.381426	0.978	0.804	1.9523e-15	NSC	APC
605	2.56185e-31	0.380734	0.653	0.314	7.25131e-27	NSC	LHX2
606	9.4341e-27	0.380601	0.606	0.302	2.67032e-22	NSC	SDC2
607	3.72103e-24	0.379291	0.718	0.429	1.05324e-19	NSC	ATP2C1
608	1.60078e-13	0.377829	0.455	0.26	4.53102e-09	NSC	KCTD8
609	3.37714e-19	0.376456	0.744	0.471	9.55901e-15	NSC	FTH1
610	3.01381e-23	0.374122	0.715	0.408	8.53059e-19	NSC	USP24
611	8.57064e-34	0.372326	0.354	0.099	2.42592e-29	NSC	SEMA4A
612	2.93846e-23	0.371994	0.729	0.416	8.31732e-19	NSC	ZDHHC21
613	1.48174e-16	0.367765	0.918	0.724	4.19406e-12	NSC	TCF7L2
614	8.10955e-21	0.367606	0.614	0.338	2.29541e-16	NSC	SNCAIP
615	3.4178e-15	0.364607	0.832	0.594	9.67409e-11	NSC	FGF2
616	7.44498e-31	0.364133	0.437	0.158	2.1073e-26	NSC	CSPG5
617	1.22258e-20	0.363078	0.989	0.857	3.46051e-16	NSC	SFXN5
618	2.41725e-16	0.362936	0.909	0.659	6.84203e-12	NSC	PAMR1
619	2.07724e-15	0.360741	0.599	0.365	5.87963e-11	NSC	AL445426.1
620	1.90669e-16	0.359617	0.668	0.421	5.39688e-12	NSC	STXBP6
621	3.58545e-24	0.358134	0.989	0.881	1.01486e-19	NSC	ATP1A2
622	8.87796e-21	0.354874	0.951	0.775	2.51291e-16	NSC	CHD9
623	3.7616e-18	0.353858	0.685	0.422	1.06472e-13	NSC	TMEM164
624	2.25238e-21	0.353285	0.981	0.862	6.37536e-17	NSC	GNAQ
625	2.43832e-24	0.35314	0.698	0.394	6.90166e-20	NSC	PTAR1
626	3.69594e-23	0.352723	0.168	0.029	1.04614e-18	NSC	GFRA1
627	8.14725e-21	0.352474	0.556	0.29	2.30608e-16	NSC	ASRGL1
628	3.28938e-20	0.352106	0.562	0.295	9.3106e-16	NSC	PTCHD1
629	5.34463e-21	0.351854	1	0.989	1.5128e-16	NSC	CTNNA2
630	1.03983e-28	0.35062	0.744	0.406	2.94325e-24	NSC	ABHD2
631	2.43313e-09	0.350567	0.229	0.116	6.88696e-05	NSC	ZNF804B
632	1.04577e-22	0.350222	0.211	0.05	2.96005e-18	NSC	DNAH14
633	1.74135e-16	0.349807	0.144	0.031	4.9289e-12	NSC	DACH1
634	8.05469e-19	0.347326	0.925	0.688	2.27988e-14	NSC	LINC00299
635	2.13273e-15	0.346803	0.856	0.621	6.03669e-11	NSC	RGL1
636	1.65759e-16	0.345063	0.957	0.802	4.69182e-12	NSC	RANBP3L
637	8.46708e-18	0.344635	0.933	0.707	2.39661e-13	NSC	PDE7B
638	4.76022e-29	0.343807	0.429	0.161	1.34738e-24	NSC	MFGE8
639	2.16301e-15	0.34367	0.351	0.163	6.12241e-11	NSC	MIR2052HG
640	1.90345e-20	0.343467	0.744	0.455	5.38772e-16	NSC	ACSL3
641	7.09778e-19	0.343159	0.879	0.613	2.00903e-14	NSC	TMTC2
642	2.99305e-20	0.341828	0.888	0.626	8.47183e-16	NSC	SFMBT2
643	4.22809e-22	0.341744	0.994	0.921	1.19676e-17	NSC	RYR3
644	6.40607e-22	0.340745	0.547	0.28	1.81324e-17	NSC	PLCG1
645	4.80926e-26	0.340642	0.694	0.384	1.36126e-21	NSC	TIMP3
646	1.17927e-13	0.340031	0.888	0.654	3.33792e-09	NSC	FLRT2
647	8.50881e-18	0.339841	0.959	0.801	2.40842e-13	NSC	NFAT5
648	9.97047e-27	0.339632	0.338	0.115	2.82214e-22	NSC	LINC00982
649	3.43499e-16	0.339398	0.563	0.333	9.72274e-12	NSC	RNF182
650	3.22054e-22	0.339119	0.571	0.296	9.11573e-18	NSC	AKAP7
651	4.1953e-19	0.338952	0.271	0.096	1.18748e-14	NSC	LAMA3
652	3.84828e-15	0.338806	0.683	0.444	1.08926e-10	NSC	SUCLG2-AS1
653	1.41203e-22	0.338709	0.674	0.368	3.99674e-18	NSC	PCDH17
654	2.4461e-30	0.338219	0.396	0.13	6.92369e-26	NSC	HOPX
655	7.02392e-27	0.338139	0.571	0.264	1.98812e-22	NSC	ST3GAL1
656	3.50022e-11	0.335941	0.293	0.149	9.90738e-07	NSC	PLSCR1
657	7.00474e-21	0.335255	0.965	0.748	1.98269e-16	NSC	PHLPP1
658	2.74618e-20	0.335195	0.774	0.501	7.77307e-16	NSC	TLE1
659	1.51319e-15	0.335165	0.866	0.627	4.28307e-11	NSC	MGST1
660	6.73072e-19	0.335153	0.748	0.476	1.90513e-14	NSC	HIF1A
661	1.55031e-19	0.334559	0.711	0.421	4.38816e-15	NSC	SREBF2
662	1.22462e-13	0.334233	0.547	0.333	3.46628e-09	NSC	SHISA6
663	4.17247e-18	0.333683	0.864	0.602	1.18102e-13	NSC	PTPN13
664	6.74939e-23	0.333648	0.754	0.452	1.91041e-18	NSC	FRMD4A
665	3.1745e-19	0.333041	0.836	0.548	8.98542e-15	NSC	RABGAP1
666	4.81693e-22	0.332088	0.567	0.287	1.36343e-17	NSC	GLI2
667	2.31741e-15	0.331998	0.944	0.768	6.55942e-11	NSC	RHOBTB3
668	1.44498e-16	0.331765	0.942	0.747	4.09001e-12	NSC	ATP13A4
669	2.83938e-20	0.331253	0.265	0.088	8.03685e-16	NSC	LYN
670	2.65351e-16	0.329245	0.797	0.532	7.51075e-12	NSC	FGFR2
671	3.24837e-20	0.328573	0.625	0.351	9.19451e-16	NSC	USP3
672	6.94488e-15	0.327382	0.933	0.721	1.96575e-10	NSC	CHPT1
673	3.61426e-15	0.327051	0.886	0.689	1.02302e-10	NSC	MYO6
674	6.23861e-19	0.326936	0.937	0.703	1.76584e-14	NSC	PRDM16
675	2.27334e-16	0.326543	0.774	0.526	6.4347e-12	NSC	FERMT2
676	1.61473e-15	0.326191	0.907	0.672	4.57048e-11	NSC	ACSS1
677	2.57229e-19	0.324865	0.558	0.298	7.28086e-15	NSC	PHKA1
678	3.33906e-21	0.324792	0.325	0.119	9.45121e-17	NSC	NDRG1
679	3.45382e-16	0.324295	0.569	0.336	9.77604e-12	NSC	C3orf70
680	2.84379e-19	0.323818	0.978	0.874	8.04935e-15	NSC	GPHN
681	6.38051e-23	0.323071	0.3	0.102	1.806e-18	NSC	HEPN1
682	1.25658e-29	0.322842	0.229	0.043	3.55676e-25	NSC	LINC00500
683	1.33945e-29	0.32281	0.181	0.022	3.7913e-25	NSC	FGL1
684	4.69047e-20	0.32238	0.996	0.958	1.32764e-15	NSC	NTRK2
685	1.75137e-15	0.321383	0.916	0.679	4.95725e-11	NSC	POU2F1
686	1.07041e-16	0.321273	0.976	0.89	3.02981e-12	NSC	SASH1
687	5.90472e-15	0.321163	0.966	0.839	1.67133e-10	NSC	CSGALNACT1
688	6.44499e-18	0.319445	0.425	0.205	1.82425e-13	NSC	RIPOR2
689	4.91043e-21	0.316617	0.58	0.305	1.3899e-16	NSC	AGL
690	1.86071e-13	0.316134	0.985	0.863	5.26673e-09	NSC	MGAT4C
691	6.97463e-17	0.315171	0.89	0.627	1.97417e-12	NSC	GRID1
692	4.52848e-26	0.314884	0.55	0.252	1.28179e-21	NSC	CLDN10
693	1.51784e-22	0.313148	0.646	0.344	4.29624e-18	NSC	SCARA3
694	7.64819e-13	0.312171	0.569	0.35	2.16482e-08	NSC	XKR6
695	2.53712e-15	0.311607	0.903	0.644	7.18133e-11	NSC	KAT2B
696	1.17581e-18	0.311403	0.851	0.588	3.32814e-14	NSC	NCAN
697	5.89074e-20	0.310677	0.377	0.164	1.66737e-15	NSC	TIPARP
698	2.16712e-15	0.310673	0.625	0.384	6.13402e-11	NSC	ANO5
699	8.35094e-15	0.308592	0.896	0.666	2.36373e-10	NSC	PDLIM5
700	2.39053e-19	0.308308	0.66	0.378	6.7664e-15	NSC	RAB31
701	2.05477e-14	0.308127	0.931	0.748	5.81602e-10	NSC	CDC42BPA
702	2.4581e-15	0.308044	0.955	0.797	6.95765e-11	NSC	MED12L
703	6.40622e-12	0.307426	0.409	0.227	1.81328e-07	NSC	PID1
704	2.39962e-17	0.306733	0.603	0.352	6.79212e-13	NSC	ITGAV
705	2.28388e-23	0.306623	0.524	0.249	6.46452e-19	NSC	FBXO21
706	5.56362e-19	0.306262	0.147	0.028	1.57478e-14	NSC	CHI3L1
707	1.18062e-13	0.30605	0.94	0.743	3.34174e-09	NSC	TRIM9
708	3.73382e-22	0.304668	0.183	0.038	1.05686e-17	NSC	AC008957.2
709	1.18592e-15	0.304265	0.789	0.53	3.35674e-11	NSC	WASF3
710	1.75762e-23	0.303305	0.565	0.281	4.97494e-19	NSC	AASS
711	7.69066e-05	0.303141	0.537	0.427	1	NSC	KCND2
712	2.0995e-23	0.30283	0.493	0.228	5.94263e-19	NSC	ATL2
713	1.8474e-13	0.30215	0.59	0.38	5.22906e-09	NSC	ABCC9
714	7.37955e-14	0.302029	0.847	0.603	2.08878e-09	NSC	PCGF5
715	9.37482e-26	0.301878	0.293	0.087	2.65354e-21	NSC	NID1
716	2.89767e-16	0.301745	0.494	0.27	8.20186e-12	NSC	AC125613.1
717	7.15411e-15	0.300654	0.866	0.614	2.02497e-10	NSC	MEGF10
718	8.06019e-21	0.299564	0.313	0.116	2.28144e-16	NSC	TMEM241
719	9.43302e-16	0.299463	0.817	0.559	2.67002e-11	NSC	CEP350
720	2.25779e-25	0.297964	0.313	0.1	6.39068e-21	NSC	TBC1D10A
721	1.00187e-16	0.297652	0.84	0.576	2.8358e-12	NSC	PPP1R12A
722	3.35436e-21	0.297153	0.698	0.386	9.49451e-17	NSC	AMER2
723	2.11599e-13	0.297083	0.951	0.761	5.98932e-09	NSC	FBXL17
724	9.27818e-20	0.296512	0.621	0.344	2.62619e-15	NSC	TMOD2
725	5.45746e-12	0.296252	0.771	0.552	1.54473e-07	NSC	BAALC
726	1.84109e-14	0.295926	0.955	0.769	5.21119e-10	NSC	TRIO
727	4.12793e-14	0.2955	0.731	0.489	1.16841e-09	NSC	KLF7
728	3.83996e-12	0.293729	0.422	0.234	1.0869e-07	NSC	POU6F2
729	1.70831e-28	0.293209	0.448	0.168	4.83536e-24	NSC	VEGFA
730	5.91288e-06	0.292584	0.254	0.156	0.167364	NSC	DCHS2
731	1.36399e-16	0.292529	0.649	0.404	3.86078e-12	NSC	HS2ST1
732	2.43232e-22	0.292016	0.733	0.419	6.88467e-18	NSC	GPR37L1
733	4.49538e-14	0.290773	0.828	0.609	1.27242e-09	NSC	WLS
734	2.01249e-14	0.290382	0.978	0.856	5.69635e-10	NSC	CAMTA1
735	6.02963e-14	0.290356	0.793	0.568	1.70669e-09	NSC	CDC14A
736	3.99016e-15	0.290156	0.207	0.071	1.12941e-10	NSC	AL591686.2
737	1.02565e-09	0.288974	0.153	0.059	2.90311e-05	NSC	AC022639.1
738	2.3258e-22	0.288358	0.638	0.36	6.58319e-18	NSC	TP53BP2
739	3.15376e-17	0.288263	0.899	0.675	8.92672e-13	NSC	GJA1
740	7.5317e-13	0.287415	0.965	0.829	2.13185e-08	NSC	TMEM161B-AS1
741	2.10447e-14	0.287254	0.843	0.606	5.95669e-10	NSC	MAGI1
742	2.08507e-15	0.286586	0.356	0.173	5.9018e-11	NSC	BDH1
743	1.02587e-12	0.28588	0.692	0.452	2.90373e-08	NSC	CA8
744	1.04813e-11	0.285367	0.925	0.724	2.96675e-07	NSC	AC027117.2
745	7.11666e-13	0.285049	0.78	0.552	2.01437e-08	NSC	PER3
746	6.20062e-11	0.284687	0.528	0.338	1.75509e-06	NSC	SCFD2
747	1.06978e-15	0.284572	0.711	0.453	3.02802e-11	NSC	FGGY
748	2.69188e-18	0.284551	0.996	0.955	7.61937e-14	NSC	NFIA
749	3.57593e-19	0.284546	0.604	0.336	1.01217e-14	NSC	ETFDH
750	6.94179e-15	0.284281	0.674	0.421	1.96487e-10	NSC	EPS8
751	4.20124e-12	0.283947	0.545	0.341	1.18916e-07	NSC	MKRN3
752	1.61276e-18	0.283464	0.853	0.581	4.56491e-14	NSC	LRP4
753	4.80834e-12	0.283215	0.951	0.827	1.361e-07	NSC	BCL2
754	1.58521e-21	0.282884	0.271	0.088	4.48693e-17	NSC	PCDH9-AS2
755	1.20144e-24	0.28158	0.16	0.022	3.40068e-20	NSC	ARHGAP29
756	3.33704e-16	0.280906	0.576	0.328	9.44549e-12	NSC	LINC02060
757	3.53848e-19	0.280546	0.597	0.334	1.00157e-14	NSC	PLIN5
758	2.69737e-21	0.27952	0.149	0.024	7.6349e-17	NSC	AC022294.1
759	8.22856e-14	0.27914	0.759	0.51	2.32909e-09	NSC	TRIP12
760	2.06389e-14	0.27895	0.782	0.53	5.84183e-10	NSC	PIK3R1
761	8.98796e-14	0.278799	0.901	0.704	2.54404e-09	NSC	DDAH1
762	2.03246e-19	0.278655	0.668	0.38	5.75288e-15	NSC	SPRED2
763	1.00546e-14	0.278283	0.233	0.089	2.84595e-10	NSC	C2CD6
764	1.31701e-14	0.277229	0.558	0.323	3.7278e-10	NSC	BRINP2
765	3.26389e-08	0.277034	0.8	0.624	0.000923843	NSC	PTCHD1-AS
766	1.81469e-18	0.276691	0.341	0.146	5.13649e-14	NSC	ANKRD29
767	1.8433e-15	0.276662	0.517	0.287	5.21746e-11	NSC	ZFP36L2
768	1.53119e-29	0.276613	0.285	0.072	4.33404e-25	NSC	GJB6
769	9.58561e-18	0.276331	0.58	0.319	2.71321e-13	NSC	SETD3
770	2.05552e-22	0.275902	0.483	0.227	5.81814e-18	NSC	TSPOAP1
771	5.20449e-17	0.273219	0.517	0.281	1.47313e-12	NSC	ORC4
772	2.52558e-13	0.273048	0.993	0.924	7.14866e-09	NSC	FBXL7
773	3.36637e-13	0.272643	0.892	0.696	9.52851e-09	NSC	INPP4B
774	1.25988e-20	0.272168	0.418	0.187	3.5661e-16	NSC	SALL3
775	1.05057e-17	0.271655	0.582	0.317	2.97364e-13	NSC	EEF2K
776	3.19365e-14	0.271249	0.578	0.346	9.03963e-10	NSC	GPSM2
777	7.45088e-14	0.270575	0.849	0.614	2.10897e-09	NSC	SLC6A1
778	7.86539e-19	0.27046	0.787	0.496	2.2263e-14	NSC	GRAMD1B
779	3.42734e-18	0.270458	0.534	0.278	9.70108e-14	NSC	PSMG4
780	1.39151e-12	0.269628	0.554	0.341	3.93868e-08	NSC	ROBO1
781	1.09746e-11	0.269255	0.789	0.563	3.10636e-07	NSC	KIAA0319
782	2.32363e-09	0.264745	0.862	0.647	6.57704e-05	NSC	PLSCR4
783	2.19162e-12	0.264567	0.804	0.567	6.20337e-08	NSC	METTL15
784	4.86046e-17	0.264207	0.664	0.387	1.37575e-12	NSC	ATP8A1
785	1.19377e-09	0.263995	0.325	0.179	3.37898e-05	NSC	AC113414.1
786	8.85942e-15	0.262758	0.826	0.571	2.50766e-10	NSC	ANKDD1A
787	4.42861e-19	0.262724	0.535	0.277	1.25352e-14	NSC	FUT10
788	1.92346e-16	0.262556	0.787	0.49	5.44435e-12	NSC	SEMA4B
789	5.64531e-11	0.261662	0.659	0.446	1.5979e-06	NSC	AKAP10
790	3.20169e-23	0.260847	0.744	0.429	9.06237e-19	NSC	SOX9
791	3.80279e-13	0.258828	0.791	0.54	1.07638e-08	NSC	KIF21A
792	1.70361e-18	0.258803	0.267	0.094	4.82206e-14	NSC	TRIM47
793	5.90045e-14	0.258398	0.468	0.261	1.67012e-09	NSC	KCND3
794	6.79263e-22	0.257601	0.382	0.155	1.92265e-17	NSC	AMY2B
795	2.12718e-13	0.257246	0.825	0.563	6.02098e-09	NSC	ZNF518A
796	3.46032e-13	0.254738	0.787	0.533	9.79444e-09	NSC	MLLT3
797	5.59906e-15	0.25471	0.657	0.411	1.58481e-10	NSC	PPM1K
798	5.94697e-09	0.254383	0.879	0.693	0.000168329	NSC	PPP1R9A
799	5.07281e-13	0.253947	0.759	0.515	1.43586e-08	NSC	MAGI3
800	2.29725e-09	0.252276	0.703	0.505	6.50237e-05	NSC	GDAP1
801	2.56168e-14	0.25152	0.75	0.512	7.25082e-10	NSC	TLK1
802	2.45265e-10	0.251069	0.231	0.108	6.94223e-06	NSC	NEXMIF
803	1.42833e-14	0.250914	0.705	0.464	4.0429e-10	NSC	PAPLN
804	9.68273e-11	0.2506	0.94	0.761	2.7407e-06	NSC	MAP4K4
805	1.62201e-16	0.250575	0.58	0.328	4.59111e-12	NSC	MMP28
806	2.62462e-14	0.250527	0.222	0.083	7.429e-10	NSC	ZFHX4-AS1
807	1.16126e-25	0.250404	0.321	0.101	3.28694e-21	NSC	EPAS1
808	1.11976e-17	0.250294	0.595	0.328	3.16947e-13	NSC	DECR1
809	1.2055e-11	0.250253	0.91	0.701	3.41216e-07	NSC	ARHGAP32
810	1.22205e-17	0.250215	0.459	0.227	3.45902e-13	NSC	LYVE1
811	2.24507e-11	0.250139	0.944	0.772	6.35467e-07	NSC	CACHD1
812	4.74604e-14	0.249793	0.858	0.606	1.34337e-09	NSC	RBM26
813	4.31659e-17	0.249495	0.502	0.26	1.22181e-12	NSC	NRP2
814	1.93954e-13	0.24944	0.789	0.552	5.48988e-09	NSC	NRF1
815	7.47742e-11	0.248513	0.813	0.592	2.11648e-06	NSC	PLPP3
816	2.41316e-12	0.24799	0.991	0.909	6.83044e-08	NSC	FMNL2
817	1.57356e-19	0.247535	0.282	0.1	4.45397e-15	NSC	RGCC
818	1.64575e-18	0.247076	0.496	0.25	4.65828e-14	NSC	SYBU
819	4.46304e-13	0.247003	0.688	0.45	1.26326e-08	NSC	CDH11
820	6.67554e-25	0.246984	0.209	0.043	1.88951e-20	NSC	SEL1L3
821	3.04257e-13	0.246823	0.778	0.522	8.61198e-09	NSC	LRP1
822	3.4066e-21	0.24631	0.269	0.087	9.64237e-17	NSC	PDE5A
823	5.89394e-13	0.246287	0.838	0.598	1.66828e-08	NSC	NCKAP1
824	1.2049e-10	0.245728	0.513	0.323	3.41048e-06	NSC	AC091948.1
825	7.14094e-14	0.245278	0.78	0.528	2.02124e-09	NSC	LAMA1
826	4.41133e-12	0.245217	0.881	0.642	1.24863e-07	NSC	EPS15
827	2.63263e-14	0.244942	0.825	0.562	7.45166e-10	NSC	VPS13C
828	1.46765e-13	0.244439	0.218	0.085	4.15417e-09	NSC	BMPER
829	1.64999e-14	0.244428	0.724	0.459	4.6703e-10	NSC	PPM1B
830	8.78391e-13	0.244246	0.603	0.379	2.48629e-08	NSC	AL121760.1
831	1.38642e-14	0.243644	0.351	0.167	3.92427e-10	NSC	KCNIP1
832	3.86035e-12	0.24285	0.174	0.062	1.09267e-07	NSC	COL23A1
833	1.75927e-22	0.241398	0.313	0.108	4.97961e-18	NSC	LRP8
834	4.2764e-22	0.241081	0.616	0.319	1.21043e-17	NSC	BCAN
835	2.71536e-16	0.241069	0.826	0.547	7.68581e-12	NSC	SDC4
836	3.50696e-09	0.241047	0.819	0.598	9.92645e-05	NSC	MFHAS1
837	1.4942e-21	0.240157	0.306	0.105	4.22934e-17	NSC	PRR5
838	7.92943e-11	0.24001	0.937	0.775	2.24442e-06	NSC	DANT2
839	1.83567e-21	0.239908	0.33	0.122	5.19587e-17	NSC	HES1
840	1.72438e-18	0.239484	0.229	0.073	4.88086e-14	NSC	NEDD9
841	2.13321e-10	0.23946	0.354	0.198	6.03805e-06	NSC	BAALC-AS1
842	8.80602e-19	0.239147	0.584	0.319	2.49254e-14	NSC	HMGN3
843	1.29926e-10	0.238558	0.972	0.843	3.67754e-06	NSC	DDX17
844	1.04661e-15	0.237812	0.409	0.201	2.96242e-11	NSC	ENOSF1
845	3.78964e-12	0.237789	0.289	0.137	1.07266e-07	NSC	DDX58
846	1.04145e-14	0.237653	0.696	0.43	2.94784e-10	NSC	RAB11FIP2
847	1.8377e-12	0.237396	0.729	0.481	5.2016e-08	NSC	FNDC3B
848	1.16853e-07	0.236513	0.231	0.125	0.00330752	NSC	PKN2-AS1
849	1.46074e-08	0.236288	0.897	0.733	0.000413462	NSC	FAT3
850	2.03129e-12	0.235792	0.994	0.943	5.74958e-08	NSC	DOCK4
851	4.86076e-12	0.235779	0.965	0.804	1.37584e-07	NSC	SGIP1
852	3.35428e-10	0.235522	0.75	0.527	9.49428e-06	NSC	ZC3H12C
853	3.37755e-12	0.235487	0.785	0.554	9.56015e-08	NSC	NIN
854	8.39425e-18	0.234406	0.142	0.028	2.37599e-13	NSC	LPAR3
855	1.56128e-15	0.233404	0.418	0.208	4.41921e-11	NSC	PDK4
856	3.43649e-10	0.232953	0.916	0.727	9.72699e-06	NSC	CTDSPL
857	5.83155e-10	0.232586	0.59	0.393	1.65062e-05	NSC	AC005162.3
858	1.64718e-13	0.23225	0.235	0.095	4.66234e-09	NSC	MBNL3
859	4.14432e-12	0.232115	0.716	0.484	1.17305e-07	NSC	CDH10
860	1.21806e-12	0.232039	0.619	0.388	3.44771e-08	NSC	MPPED2
861	4.33901e-16	0.231838	0.535	0.299	1.22816e-11	NSC	AL136366.1
862	3.11648e-08	0.231362	0.634	0.46	0.00088212	NSC	AC108866.1
863	8.57895e-16	0.231185	0.515	0.281	2.42827e-11	NSC	B4GALNT4
864	9.96918e-11	0.230978	0.869	0.638	2.82178e-06	NSC	STK3
865	1.28877e-11	0.230969	0.791	0.566	3.64786e-07	NSC	CDC14B
866	4.07472e-20	0.230966	0.64	0.342	1.15335e-15	NSC	IL6ST
867	2.68379e-20	0.230853	0.504	0.246	7.59647e-16	NSC	FAM204A
868	1.24856e-10	0.23075	0.761	0.514	3.53405e-06	NSC	FKBP5
869	7.91344e-06	0.230419	0.498	0.355	0.22399	NSC	AC006148.1
870	2.4454e-11	0.230162	0.985	0.862	6.92171e-07	NSC	MAP3K5
871	2.38929e-16	0.229902	0.356	0.164	6.76288e-12	NSC	ADAMTS10
872	6.70854e-13	0.229776	0.438	0.243	1.89885e-08	NSC	EAF2
873	4.46854e-14	0.229658	0.517	0.299	1.26482e-09	NSC	MEF2C
874	1.44748e-10	0.229636	0.91	0.732	4.09711e-06	NSC	WDFY3
875	3.73687e-06	0.229444	0.418	0.295	0.105772	NSC	FIGN
876	8.07654e-12	0.229054	0.851	0.606	2.28606e-07	NSC	UTY
877	4.68437e-15	0.228998	0.653	0.391	1.32591e-10	NSC	ZNF827
878	4.41399e-17	0.228484	0.338	0.148	1.24938e-12	NSC	SHROOM2
879	8.23757e-11	0.227464	0.864	0.615	2.33164e-06	NSC	ACSS3
880	7.46716e-10	0.227435	0.761	0.548	2.11358e-05	NSC	TTTY14
881	4.37569e-12	0.227113	0.769	0.518	1.23854e-07	NSC	SCMH1
882	3.24095e-14	0.227063	0.703	0.44	9.1735e-10	NSC	ZNF280D
883	1.20682e-16	0.227047	0.364	0.169	3.41591e-12	NSC	SLC30A10
884	3.84304e-06	0.226859	0.433	0.308	0.108777	NSC	LINC01266
885	4.95248e-15	0.226758	0.575	0.334	1.4018e-10	NSC	RALGDS
886	1.02808e-14	0.226327	0.588	0.347	2.90998e-10	NSC	DCUN1D1
887	5.25609e-08	0.226257	0.907	0.709	0.00148774	NSC	LINC01748
888	2.79612e-16	0.226184	0.597	0.353	7.91441e-12	NSC	CGNL1
889	1.16384e-17	0.225546	0.575	0.315	3.29426e-13	NSC	HERPUD2
890	9.93408e-13	0.225212	0.728	0.48	2.81184e-08	NSC	FAM198B-AS1
891	1.9362e-11	0.224979	0.784	0.549	5.48042e-07	NSC	NOTCH2
892	1.64504e-14	0.224595	0.25	0.101	4.65627e-10	NSC	PCTP
893	6.69901e-10	0.223302	0.491	0.315	1.89616e-05	NSC	ROR1
894	1.53266e-16	0.223219	0.662	0.383	4.33819e-12	NSC	HIVEP1
895	5.13865e-15	0.223135	0.431	0.222	1.45449e-10	NSC	NTSR2
896	9.44093e-16	0.222963	0.368	0.172	2.67226e-11	NSC	MIAT
897	4.46195e-15	0.222669	0.364	0.177	1.26295e-10	NSC	CU633967.1
898	6.17559e-13	0.222538	0.563	0.341	1.748e-08	NSC	WRN
899	5.46774e-14	0.222086	0.44	0.233	1.54764e-09	NSC	PGM1
900	2.8091e-09	0.22114	0.759	0.571	7.95115e-05	NSC	EFNA5
901	7.40627e-13	0.220973	0.662	0.413	2.09634e-08	NSC	INTS10
902	2.65539e-11	0.220967	0.209	0.088	7.51608e-07	NSC	LINC00886
903	3.91348e-15	0.213232	0.687	0.417	1.10771e-10	NSC	SOX2
905	1.0689e-13	0.149773	0.116	0.025	3.02553e-09	NSC	HES5
