# Supplementary material for: Transcriptome dynamics of hippocampal neurogenesis in macaques across the lifespan and aged humans
Source: Research Square preprint supplement (doi:10.21203/rs.3.rs-1015150/v1), 2021-11-18
Supplement: Supplementary file 9 [file 4c4a770e6428e2a6153de2c1.xlsx]

## Sheet: Table S4
Supplementary Table4: Differentially expressed genes among macaque Astrocyte, NSC11 and NSC12
	p_val	avg_log2FC	pct.1	pct.2	p_val_adj	cluster	gene
LUZP2	0	1.68267	0.798	0.387	0	NSC1	LUZP2
SLC1A2	6.69863e-308	0.766047	1	0.98	9.16239e-304	NSC1	SLC1A2
GPC5	2.36668e-194	1.08495	0.897	0.722	3.23714e-190	NSC1	GPC5
NRXN1	9.73819e-184	0.449441	1	0.998	1.33199e-179	NSC1	NRXN1
SLC1A3	2.0501e-177	0.615811	0.992	0.944	2.80413e-173	NSC1	SLC1A3
PREX2	3.44669e-167	0.715558	0.924	0.729	4.71439e-163	NSC1	PREX2
GPM6A	1.27484e-140	0.418798	1	0.995	1.74373e-136	NSC1	GPM6A
ACSBG1	2.80747e-122	0.811259	0.623	0.33	3.84006e-118	NSC1	ACSBG1
FRMD4A	1.11999e-121	0.498174	0.995	0.95	1.53192e-117	NSC1	FRMD4A
CARMIL1	5.59126e-117	0.578326	0.932	0.793	7.64773e-113	NSC1	CARMIL1
PLCB1	4.58987e-113	0.516747	0.966	0.885	6.27803e-109	NSC1	PLCB1
SLC4A4	6.80252e-111	0.57411	0.952	0.835	9.30449e-107	NSC1	SLC4A4
WIF1	5.95888e-107	1.07892	0.427	0.18	8.15055e-103	NSC1	WIF1
GRM3	5.47975e-104	0.798335	0.641	0.373	7.49521e-100	NSC1	GRM3
PCDH9	5.84086e-104	0.33431	1	0.997	7.98912e-100	NSC1	PCDH9
OLFM2	4.40789e-97	0.673851	0.702	0.44	6.02911e-93	NSC1	OLFM2
CACNB2	2.73435e-92	0.584707	0.878	0.708	3.74004e-88	NSC1	CACNB2
ADGRB3	6.09695e-82	0.298139	0.998	0.989	8.33941e-78	NSC1	ADGRB3
CADM1	3.27423e-78	0.470229	0.946	0.868	4.4785e-74	NSC1	CADM1
NKAIN3	7.97244e-77	0.305569	0.998	0.988	1.09047e-72	NSC1	NKAIN3
MAPK4	1.21262e-76	0.649425	0.54	0.311	1.65863e-72	NSC1	MAPK4
MFGE8	5.46479e-76	0.61498	0.609	0.38	7.47473e-72	NSC1	MFGE8
GPC6	8.7786e-75	0.486218	0.89	0.756	1.20074e-70	NSC1	GPC6
RGS20	2.34554e-74	0.531142	0.809	0.61	3.20823e-70	NSC1	RGS20
ADGRV1	9.88574e-73	0.258807	1	0.997	1.35217e-68	NSC1	ADGRV1
MERTK	8.47225e-72	0.602883	0.595	0.361	1.15883e-67	NSC1	MERTK
SLCO1C1	2.23794e-70	0.604751	0.365	0.166	3.06106e-66	NSC1	SLCO1C1
RORB	1.44761e-69	0.591241	0.59	0.36	1.98004e-65	NSC1	RORB
UNC5D	2.10478e-67	0.44472	0.901	0.753	2.87891e-63	NSC1	UNC5D
COL5A3	1.83813e-65	0.648427	0.447	0.242	2.5142e-61	NSC1	COL5A3
GRID1	1.54745e-63	0.501718	0.73	0.521	2.11661e-59	NSC1	GRID1
PDZRN4	5.05446e-58	0.608742	0.843	0.698	6.91349e-54	NSC1	PDZRN4
PREX1	1.33464e-53	0.467517	0.793	0.622	1.82551e-49	NSC1	PREX1
ETNPPL	8.29423e-51	0.438735	0.715	0.512	1.13448e-46	NSC1	ETNPPL
ATP13A4	2.24994e-50	0.404819	0.84	0.683	3.07747e-46	NSC1	ATP13A4
PHKA1	7.37875e-49	0.54006	0.531	0.351	1.00927e-44	NSC1	PHKA1
EFNA5	1.70317e-48	0.516115	0.518	0.333	2.3296e-44	NSC1	EFNA5
ITPR2	6.8997e-48	0.366658	0.848	0.698	9.4374e-44	NSC1	ITPR2
EPHB1	8.73474e-48	0.44243	0.776	0.625	1.19474e-43	NSC1	EPHB1
OPHN1	2.50875e-47	0.324151	0.937	0.853	3.43146e-43	NSC1	OPHN1
ACACB	4.54364e-47	0.399125	0.746	0.577	6.2148e-43	NSC1	ACACB
FOLH1	1.4199e-45	0.511507	0.454	0.28	1.94214e-41	NSC1	FOLH1
RIN2	2.346e-45	0.489389	0.564	0.385	3.20886e-41	NSC1	RIN2
CLDN10	3.75044e-43	0.468899	0.306	0.158	5.12986e-39	NSC1	CLDN10
GPAM	4.20607e-43	0.472772	0.252	0.118	5.75306e-39	NSC1	GPAM
GLI2	8.0577e-43	0.523705	0.242	0.112	1.10213e-38	NSC1	GLI2
FGFR1	1.21312e-42	0.366169	0.82	0.675	1.65931e-38	NSC1	FGFR1
NHSL1	1.43249e-42	0.42575	0.747	0.592	1.95936e-38	NSC1	NHSL1
PHLPP1	5.28524e-42	0.35649	0.88	0.759	7.22915e-38	NSC1	PHLPP1
ERBB4	8.09443e-42	0.293359	0.98	0.932	1.10716e-37	NSC1	ERBB4
GLI3	1.46023e-41	0.331349	0.864	0.728	1.99731e-37	NSC1	GLI3
EDNRB	2.03005e-41	0.461485	0.372	0.215	2.7767e-37	NSC1	EDNRB
GABBR1	3.69035e-41	0.340021	0.871	0.763	5.04766e-37	NSC1	GABBR1
RALGAPA2	4.4286e-41	0.349759	0.782	0.612	6.05744e-37	NSC1	RALGAPA2
TMEM132C	2.26811e-40	0.532349	0.385	0.229	3.10232e-36	NSC1	TMEM132C
TPD52L1	2.37318e-39	0.474399	0.435	0.274	3.24603e-35	NSC1	TPD52L1
ARHGAP26	3.29466e-39	0.306141	0.906	0.792	4.50644e-35	NSC1	ARHGAP26
HHIPL1	1.25994e-38	0.518632	0.282	0.149	1.72335e-34	NSC1	HHIPL1
MRVI1	2.87388e-38	0.399187	0.546	0.37	3.9309e-34	NSC1	MRVI1
TCF7L2	3.77078e-38	0.353968	0.788	0.639	5.15767e-34	NSC1	TCF7L2
HTRA1	4.45237e-38	0.436482	0.409	0.248	6.08995e-34	NSC1	HTRA1
ACBD7	3.49741e-37	0.507657	0.31	0.174	4.78375e-33	NSC1	ACBD7
SH3RF1	4.09165e-37	0.389641	0.613	0.44	5.59656e-33	NSC1	SH3RF1
ARHGAP31	8.87025e-37	0.414812	0.504	0.337	1.21327e-32	NSC1	ARHGAP31
RAI14	1.06241e-36	0.447981	0.46	0.302	1.45317e-32	NSC1	RAI14
SLC6A11	4.32627e-36	0.395462	0.414	0.255	5.91748e-32	NSC1	SLC6A11
SFXN5	9.93381e-36	0.312395	0.863	0.769	1.35875e-31	NSC1	SFXN5
NID1	2.44428e-35	0.410193	0.392	0.239	3.34329e-31	NSC1	NID1
SEL1L3	5.07929e-35	0.440934	0.39	0.242	6.94745e-31	NSC1	SEL1L3
RORA	6.30788e-35	0.331649	0.755	0.597	8.62792e-31	NSC1	RORA
XYLT1	1.40499e-33	0.353438	0.617	0.446	1.92174e-29	NSC1	XYLT1
SFMBT2	1.73478e-33	0.412925	0.405	0.253	2.37284e-29	NSC1	SFMBT2
EYA2	4.31386e-33	0.420819	0.331	0.193	5.90049e-29	NSC1	EYA2
SOX5	4.51925e-33	0.304407	0.86	0.751	6.18142e-29	NSC1	SOX5
MCC	1.63178e-32	0.296778	0.751	0.588	2.23195e-28	NSC1	MCC
PHACTR3	1.88632e-32	0.352102	0.601	0.446	2.58011e-28	NSC1	PHACTR3
SLC39A12	2.36817e-32	0.413106	0.267	0.143	3.23918e-28	NSC1	SLC39A12
SLC1A4	3.22765e-32	0.422164	0.306	0.177	4.41478e-28	NSC1	SLC1A4
PAPLN	4.5482e-32	0.378202	0.226	0.114	6.22102e-28	NSC1	PAPLN
GABRA2	7.35568e-32	0.317126	0.702	0.54	1.00611e-27	NSC1	GABRA2
MEGF10	1.25176e-31	0.365403	0.607	0.447	1.71216e-27	NSC1	MEGF10
ADGRL3	1.79845e-31	0.287793	0.766	0.625	2.45991e-27	NSC1	ADGRL3
ALDH1A1	3.74059e-31	0.417609	0.634	0.489	5.11637e-27	NSC1	ALDH1A1
HIF3A	7.39281e-31	0.399209	0.247	0.131	1.01119e-26	NSC1	HIF3A
VEGFA	4.63659e-30	0.384191	0.289	0.166	6.34193e-26	NSC1	VEGFA
GRIN2C	7.01414e-30	0.366581	0.15	0.063	9.59394e-26	NSC1	GRIN2C
CPEB3	1.31559e-29	0.308678	0.76	0.632	1.79947e-25	NSC1	CPEB3
EPB41L2	1.65345e-29	0.363107	0.581	0.429	2.26158e-25	NSC1	EPB41L2
ZSWIM6	3.96532e-29	0.479869	0.601	0.474	5.42376e-25	NSC1	ZSWIM6
FNDC3B	6.8722e-29	0.349273	0.596	0.451	9.39979e-25	NSC1	FNDC3B
ASAP2	1.48952e-28	0.353755	0.506	0.352	2.03736e-24	NSC1	ASAP2
SASH1	3.39338e-28	0.257904	0.914	0.824	4.64146e-24	NSC1	SASH1
KCNIP1	3.81692e-28	0.37448	0.528	0.382	5.22078e-24	NSC1	KCNIP1
WASF3	3.86363e-28	0.351804	0.415	0.275	5.28467e-24	NSC1	WASF3
TNS3	4.28215e-28	0.32102	0.56	0.402	5.85712e-24	NSC1	TNS3
FAM171B	4.85187e-28	0.341862	0.577	0.431	6.63638e-24	NSC1	FAM171B
EEF2K	7.12797e-28	0.343565	0.494	0.343	9.74964e-24	NSC1	EEF2K
SPRED1	8.35086e-28	0.322594	0.474	0.326	1.14223e-23	NSC1	SPRED1
EZR	1.05517e-27	0.365673	0.251	0.14	1.44326e-23	NSC1	EZR
SLC15A2	2.28762e-27	0.306307	0.692	0.543	3.12901e-23	NSC1	SLC15A2
MGLL	6.0544e-27	0.333602	0.497	0.353	8.2812e-23	NSC1	MGLL
CACNG4	1.01973e-26	0.404938	0.198	0.102	1.39479e-22	NSC1	CACNG4
PPARGC1A	1.11996e-26	0.320123	0.324	0.199	1.53188e-22	NSC1	PPARGC1A
LGR4	1.83477e-26	0.380003	0.435	0.3	2.5096e-22	NSC1	LGR4
SFXN1	2.09125e-26	0.386107	0.499	0.365	2.86041e-22	NSC1	SFXN1
SLC25A18	4.40998e-26	0.265718	0.814	0.681	6.03197e-22	NSC1	SLC25A18
ZFHX4	5.0556e-26	0.261782	0.74	0.608	6.91504e-22	NSC1	ZFHX4
GRK3	7.22603e-26	0.300672	0.468	0.321	9.88376e-22	NSC1	GRK3
SORCS2	8.9276e-26	0.367625	0.514	0.381	1.22112e-21	NSC1	SORCS2
PTPN13	1.22805e-25	0.327127	0.489	0.35	1.67972e-21	NSC1	PTPN13
SHISA9	1.33302e-25	0.385494	0.586	0.458	1.82331e-21	NSC1	SHISA9
DDAH1	1.449e-25	0.352558	0.49	0.354	1.98195e-21	NSC1	DDAH1
EGFR	1.78597e-25	0.284356	0.455	0.316	2.44285e-21	NSC1	EGFR
DOCK1	2.18491e-25	0.287563	0.762	0.64	2.98851e-21	NSC1	DOCK1
ITSN1	5.04324e-25	0.321856	0.597	0.452	6.89815e-21	NSC1	ITSN1
UNC5C	1.10831e-24	0.291317	0.651	0.514	1.51595e-20	NSC1	UNC5C
PCTP	2.75454e-23	0.345723	0.33	0.215	3.76765e-19	NSC1	PCTP
SERPINE2	7.16584e-23	0.319827	0.281	0.173	9.80144e-19	NSC1	SERPINE2
LHFPL6	7.7605e-23	0.274393	0.759	0.639	1.06148e-18	NSC1	LHFPL6
ARHGAP32	1.04014e-22	0.2677	0.788	0.672	1.42271e-18	NSC1	ARHGAP32
PTPRJ	1.70281e-22	0.295681	0.149	0.072	2.3291e-18	NSC1	PTPRJ
GALNT18	3.17567e-22	0.254275	0.81	0.7	4.34368e-18	NSC1	GALNT18
SEMA4A	8.16635e-22	0.289686	0.201	0.111	1.11699e-17	NSC1	SEMA4A
SNTA1	9.46925e-22	0.254141	0.619	0.485	1.2952e-17	NSC1	SNTA1
TOM1L2	1.0251e-21	0.260062	0.705	0.579	1.40213e-17	NSC1	TOM1L2
FGD6	1.60204e-21	0.265887	0.596	0.451	2.19128e-17	NSC1	FGD6
SRGAP3	1.61697e-21	0.285839	0.64	0.498	2.21169e-17	NSC1	SRGAP3
CPT1A	1.72667e-21	0.277746	0.162	0.083	2.36175e-17	NSC1	CPT1A
ENDOU	2.12522e-21	0.293457	0.178	0.095	2.90688e-17	NSC1	ENDOU
ZMYND8	4.56276e-21	0.289298	0.643	0.515	6.24095e-17	NSC1	ZMYND8
PID1	5.02256e-21	0.268471	0.362	0.241	6.86986e-17	NSC1	PID1
PTN	7.85798e-21	0.253766	0.441	0.31	1.07481e-16	NSC1	PTN
PDGFC	1.17873e-20	0.282402	0.435	0.307	1.61227e-16	NSC1	PDGFC
PIPOX	1.18468e-20	0.306058	0.289	0.185	1.6204e-16	NSC1	PIPOX
ESRRG	1.97914e-20	0.295871	0.287	0.183	2.70706e-16	NSC1	ESRRG
RP1	2.89063e-20	0.277905	0.242	0.146	3.95381e-16	NSC1	RP1
FUT10	3.49384e-20	0.291562	0.432	0.308	4.77887e-16	NSC1	FUT10
DOCK5	2.27529e-19	0.28507	0.218	0.129	3.11214e-15	NSC1	DOCK5
PDE9A	2.51289e-19	0.288678	0.304	0.201	3.43713e-15	NSC1	PDE9A
AKAP12	4.28417e-19	0.280381	0.23	0.14	5.85988e-15	NSC1	AKAP12
FOXN3	1.30378e-18	0.252406	0.73	0.612	1.78331e-14	NSC1	FOXN3
GABRG1	1.64656e-18	0.26966	0.4	0.284	2.25217e-14	NSC1	GABRG1
FAM184A	4.99887e-18	0.292663	0.454	0.333	6.83745e-14	NSC1	FAM184A
KCNH5	5.22638e-18	0.277684	0.219	0.133	7.14864e-14	NSC1	KCNH5
PRDM16	1.68074e-17	0.384868	0.308	0.217	2.29892e-13	NSC1	PRDM16
AHCTF1	2.92039e-17	0.26378	0.54	0.416	3.99452e-13	NSC1	AHCTF1
CSPG5	4.4571e-17	0.262453	0.341	0.237	6.09642e-13	NSC1	CSPG5
PDGFRB	4.54788e-17	0.270053	0.261	0.168	6.22058e-13	NSC1	PDGFRB
BRINP1	5.70451e-17	0.322171	0.393	0.287	7.80263e-13	NSC1	BRINP1
TP53BP2	7.22128e-17	0.252158	0.446	0.327	9.87726e-13	NSC1	TP53BP2
SDS	7.9789e-17	0.262671	0.228	0.144	1.09135e-12	NSC1	SDS
SLC6A1	9.10082e-17	0.256272	0.495	0.374	1.24481e-12	NSC1	SLC6A1
PSD2	1.09049e-16	0.281626	0.474	0.362	1.49157e-12	NSC1	PSD2
CHST11	1.17663e-15	0.381398	0.344	0.255	1.60939e-11	NSC1	CHST11
VAV3	1.22335e-15	0.282956	0.343	0.246	1.6733e-11	NSC1	VAV3
ADGRB1	1.67036e-15	0.264403	0.149	0.085	2.28472e-11	NSC1	ADGRB1
TTC23L	2.14549e-15	0.290966	0.338	0.243	2.9346e-11	NSC1	TTC23L
PCDH7	2.32772e-15	0.346537	0.276	0.193	3.18385e-11	NSC1	PCDH7
HRH1	6.0414e-15	0.317674	0.13	0.071	8.26342e-11	NSC1	HRH1
BRINP3	9.11839e-15	0.371898	0.317	0.234	1.24721e-10	NSC1	BRINP3
SEC14L1	4.63218e-14	0.255319	0.298	0.211	6.3359e-10	NSC1	SEC14L1
MGAT5	9.30529e-14	0.264906	0.212	0.14	1.27278e-09	NSC1	MGAT5
FGFR3	1.50159e-12	0.28212	0.292	0.213	2.05387e-08	NSC1	FGFR3
ITGA8	7.24351e-12	0.284873	0.123	0.073	9.90767e-08	NSC1	ITGA8
GNAQ	5.48225e-11	0.275431	0.403	0.328	7.49863e-07	NSC1	GNAQ
MTSS1	9.28868e-09	0.265507	0.334	0.266	0.000127051	NSC1	MTSS1
CACNA1A	2.19368e-07	0.284215	0.349	0.282	0.00300051	NSC1	CACNA1A
KIF1B	1.36849e-06	0.265033	0.428	0.384	0.0187181	NSC1	KIF1B
NPSR1	7.11528e-168	1.72387	0.206	0.009	9.73229e-164	NSC2	NPSR1
TNC	1.67616e-161	1.82109	0.961	0.51	2.29266e-157	NSC2	TNC
ND4	8.714e-97	1.26986	0.408	0.089	1.1919e-92	NSC2	ND4
VIM	8.98121e-89	1.345	0.306	0.058	1.22845e-84	NSC2	VIM
FREM2	1.78387e-87	0.84869	0.165	0.015	2.43997e-83	NSC2	FREM2
PDE1C	3.63323e-80	1.23445	0.254	0.044	4.96954e-76	NSC2	PDE1C
NES	2.99191e-78	0.477835	0.111	0.006	4.09233e-74	NSC2	NES
PEA15	1.29916e-75	1.04044	0.289	0.058	1.77699e-71	NSC2	PEA15
B3GAT2	1.2215e-68	0.9083	0.193	0.028	1.67077e-64	NSC2	B3GAT2
VCAN	4.57556e-65	1.28586	0.644	0.31	6.25846e-61	NSC2	VCAN
FTL	6.68727e-64	1.35493	0.38	0.115	9.14685e-60	NSC2	FTL
ACTB	1.55764e-62	1.0736	0.412	0.131	2.13054e-58	NSC2	ACTB
ATP6	1.71045e-60	0.868969	0.289	0.068	2.33955e-56	NSC2	ATP6
COX3	6.88564e-60	1.30844	0.505	0.208	9.41818e-56	NSC2	COX3
TFAP2C	7.74193e-59	0.753572	0.193	0.033	1.05894e-54	NSC2	TFAP2C
GAPDH	8.67861e-59	1.0934	0.38	0.116	1.18706e-54	NSC2	GAPDH
KCNH7	1.89039e-57	1.48309	0.375	0.121	2.58567e-53	NSC2	KCNH7
FRAS1	1.54662e-56	1.16096	0.566	0.254	2.11547e-52	NSC2	FRAS1
UBC	1.82136e-55	1.21094	0.443	0.164	2.49125e-51	NSC2	UBC
RPL15	2.35659e-53	0.92387	0.315	0.09	3.22334e-49	NSC2	RPL15
CYTB	1.57832e-51	1.04607	0.425	0.156	2.15882e-47	NSC2	CYTB
SOX6	2.58003e-49	1.03404	0.748	0.5	3.52897e-45	NSC2	SOX6
STMN1	4.96064e-49	0.947982	0.302	0.089	6.78517e-45	NSC2	STMN1
PTPRZ1	2.4616e-46	0.855009	0.937	0.889	3.36698e-42	NSC2	PTPRZ1
PCSK6	4.04054e-46	0.992281	0.469	0.194	5.52664e-42	NSC2	PCSK6
ACTG1	1.4354e-45	1.25168	0.479	0.232	1.96334e-41	NSC2	ACTG1
COX2	5.66218e-42	1.03163	0.436	0.188	7.74473e-38	NSC2	COX2
ND1	6.51919e-42	0.917474	0.421	0.173	8.91694e-38	NSC2	ND1
HMGB1	1.61417e-41	0.858313	0.271	0.083	2.20786e-37	NSC2	HMGB1
UBB	1.95126e-41	0.89616	0.312	0.105	2.66893e-37	NSC2	UBB
ADAMTS18	2.78423e-37	0.898163	0.223	0.064	3.80827e-33	NSC2	ADAMTS18
APOE	4.27499e-37	1.2609	0.727	0.569	5.84733e-33	NSC2	APOE
LY6H	8.84682e-37	0.762416	0.282	0.094	1.21007e-32	NSC2	LY6H
HNRNPK	1.11751e-36	0.715129	0.302	0.106	1.52853e-32	NSC2	HNRNPK
PGRMC1	2.3624e-35	0.644425	0.184	0.047	3.23129e-31	NSC2	PGRMC1
DPYSL3	3.51213e-35	0.775403	0.262	0.085	4.80389e-31	NSC2	DPYSL3
CALM1	6.53579e-35	0.939879	0.597	0.362	8.93965e-31	NSC2	CALM1
CHL1	4.93215e-34	0.721556	0.837	0.697	6.7462e-30	NSC2	CHL1
SEMA6A	5.1673e-34	0.84906	0.341	0.135	7.06783e-30	NSC2	SEMA6A
GNB2	6.06022e-34	0.685911	0.239	0.075	8.28917e-30	NSC2	GNB2
NR2F1	1.1776e-33	0.843327	0.438	0.212	1.61072e-29	NSC2	NR2F1
ITM2B	2.92608e-33	0.924672	0.484	0.255	4.0023e-29	NSC2	ITM2B
PPIA	2.41856e-32	0.809072	0.308	0.12	3.30811e-28	NSC2	PPIA
CALM2	5.99865e-32	0.865919	0.536	0.312	8.20495e-28	NSC2	CALM2
MAP2	9.35686e-32	0.924961	0.753	0.636	1.27983e-27	NSC2	MAP2
G3BP2	1.38911e-31	0.529253	0.184	0.05	1.90002e-27	NSC2	G3BP2
ND2	4.20412e-31	0.797114	0.321	0.129	5.7504e-27	NSC2	ND2
PROX1	5.58076e-31	0.667992	0.23	0.074	7.63336e-27	NSC2	PROX1
SYNM	1.68656e-30	0.823096	0.308	0.125	2.30688e-26	NSC2	SYNM
SETBP1	1.2577e-29	0.816676	0.445	0.219	1.72028e-25	NSC2	SETBP1
NNAT	2.11821e-29	0.579531	0.178	0.05	2.89729e-25	NSC2	NNAT
BTG1	9.76158e-29	0.526185	0.139	0.033	1.33519e-24	NSC2	BTG1
CAPN9	2.86914e-28	0.625004	0.161	0.043	3.9244e-24	NSC2	CAPN9
TUBB	3.20993e-28	0.771553	0.269	0.104	4.39054e-24	NSC2	TUBB
YWHAB	3.93727e-28	0.83081	0.334	0.147	5.3854e-24	NSC2	YWHAB
SHROOM3	5.78496e-28	0.906914	0.544	0.322	7.91266e-24	NSC2	SHROOM3
ND3	1.01648e-27	0.598454	0.206	0.066	1.39034e-23	NSC2	ND3
SERINC1	1.41596e-27	0.778671	0.354	0.162	1.93675e-23	NSC2	SERINC1
RAB14	2.57888e-27	0.620638	0.252	0.092	3.5274e-23	NSC2	RAB14
FXYD6	5.15301e-27	0.479179	0.145	0.038	7.04828e-23	NSC2	FXYD6
LTBP1	7.751e-27	0.905517	0.581	0.379	1.06018e-22	NSC2	LTBP1
COX7B	1.09361e-26	0.444313	0.128	0.03	1.49584e-22	NSC2	COX7B
PGAM1	1.40919e-26	0.590464	0.202	0.066	1.9275e-22	NSC2	PGAM1
DBI	1.47301e-26	0.548643	0.178	0.053	2.01478e-22	NSC2	DBI
AP2M1	2.02643e-26	0.477002	0.143	0.037	2.77175e-22	NSC2	AP2M1
THY1	2.78108e-26	0.634683	0.241	0.087	3.80396e-22	NSC2	THY1
ATP6AP1	3.11904e-26	0.522605	0.174	0.051	4.26623e-22	NSC2	ATP6AP1
ARHGAP24	6.53856e-26	1.01203	0.336	0.157	8.94344e-22	NSC2	ARHGAP24
SPCS1	8.42684e-26	0.460164	0.15	0.04	1.15262e-21	NSC2	SPCS1
FTH1	4.15839e-25	0.766361	0.315	0.141	5.68785e-21	NSC2	FTH1
GABARAPL2	4.70405e-25	0.52347	0.18	0.057	6.4342e-21	NSC2	GABARAPL2
SLC35F1	6.48968e-25	0.978662	0.62	0.444	8.87658e-21	NSC2	SLC35F1
CALM3	7.05076e-25	0.675135	0.275	0.112	9.64403e-21	NSC2	CALM3
GLUL	1.39279e-24	0.900152	0.486	0.281	1.90506e-20	NSC2	GLUL
RPL4	1.82443e-24	0.582441	0.189	0.063	2.49545e-20	NSC2	RPL4
NOTCH2	9.13632e-24	0.730446	0.588	0.389	1.24967e-19	NSC2	NOTCH2
FREM1	1.80461e-23	1.0061	0.395	0.217	2.46834e-19	NSC2	FREM1
DOK6	2.24601e-23	0.785387	0.551	0.362	3.07209e-19	NSC2	DOK6
RPL10	2.2661e-23	0.585353	0.195	0.068	3.09958e-19	NSC2	RPL10
RBM26	3.0451e-23	0.626021	0.451	0.239	4.16508e-19	NSC2	RBM26
ARHGAP21	4.58414e-23	0.549411	0.584	0.34	6.27019e-19	NSC2	ARHGAP21
ZFPM2	4.78655e-23	0.630748	0.835	0.737	6.54704e-19	NSC2	ZFPM2
ITM2C	6.87734e-23	0.714331	0.393	0.208	9.40682e-19	NSC2	ITM2C
WSB1	7.11609e-23	0.80243	0.57	0.391	9.73339e-19	NSC2	WSB1
PNRC1	1.05888e-22	0.545574	0.189	0.066	1.44834e-18	NSC2	PNRC1
CD59	1.0999e-22	0.618291	0.23	0.09	1.50444e-18	NSC2	CD59
BZW1	1.41977e-22	0.40869	0.121	0.031	1.94196e-18	NSC2	BZW1
MOXD1	1.43117e-22	0.790092	0.499	0.305	1.95755e-18	NSC2	MOXD1
ZIC2	1.43755e-22	0.491234	0.143	0.042	1.96629e-18	NSC2	ZIC2
RPS11	1.75822e-22	0.367067	0.111	0.027	2.40489e-18	NSC2	RPS11
LRRC58	4.24525e-22	0.481806	0.202	0.073	5.80665e-18	NSC2	LRRC58
ND5	5.84929e-22	0.467474	0.148	0.044	8.00066e-18	NSC2	ND5
CYP7B1	8.34677e-22	0.807802	0.336	0.165	1.14167e-17	NSC2	CYP7B1
MAP2K6	1.38989e-21	0.692465	0.297	0.14	1.90109e-17	NSC2	MAP2K6
CRYAB	2.17945e-21	0.443049	0.208	0.077	2.98105e-17	NSC2	CRYAB
BICD1	2.77679e-21	0.582246	0.785	0.66	3.79809e-17	NSC2	BICD1
TCF4	3.72741e-21	0.458496	0.926	0.924	5.09835e-17	NSC2	TCF4
MYL12A	5.40484e-21	0.430492	0.134	0.039	7.39274e-17	NSC2	MYL12A
CCK	2.33378e-20	0.449127	0.156	0.051	3.19215e-16	NSC2	CCK
SNTB1	3.29964e-20	0.570367	0.616	0.405	4.51324e-16	NSC2	SNTB1
ASXL3	6.06221e-20	0.61475	0.23	0.096	8.29189e-16	NSC2	ASXL3
KIF5C	7.87616e-20	0.723632	0.462	0.293	1.0773e-15	NSC2	KIF5C
NUDT4	8.06314e-20	0.529279	0.293	0.136	1.10288e-15	NSC2	NUDT4
PCSK1N	1.20242e-19	0.558273	0.256	0.113	1.64467e-15	NSC2	PCSK1N
SPARC	1.32828e-19	0.571619	0.388	0.21	1.81682e-15	NSC2	SPARC
RPS15	1.76155e-19	0.53329	0.184	0.068	2.40944e-15	NSC2	RPS15
FAM3C	3.04071e-19	0.481736	0.208	0.083	4.15908e-15	NSC2	FAM3C
CLIP2	3.12256e-19	0.417461	0.208	0.081	4.27104e-15	NSC2	CLIP2
SLC36A4	5.70033e-19	0.52254	0.239	0.103	7.79691e-15	NSC2	SLC36A4
SLC25A4	5.88033e-19	0.479814	0.163	0.058	8.04312e-15	NSC2	SLC25A4
CDON	6.32139e-19	0.757805	0.302	0.151	8.64639e-15	NSC2	CDON
FLNA	8.03276e-19	0.364509	0.108	0.03	1.09872e-14	NSC2	FLNA
STAG1	8.20029e-19	0.558412	0.542	0.36	1.12164e-14	NSC2	STAG1
PTN1	9.27361e-19	0.778299	0.521	0.363	1.26844e-14	NSC2	PTN
SLC38A2	1.12861e-18	0.424595	0.132	0.042	1.54372e-14	NSC2	SLC38A2
BNIP3	1.24451e-18	0.495503	0.2	0.08	1.70224e-14	NSC2	BNIP3
GNAS	1.53263e-18	0.658902	0.479	0.304	2.09633e-14	NSC2	GNAS
CNBP	1.87446e-18	0.470876	0.174	0.064	2.56389e-14	NSC2	CNBP
SRRM2	2.54802e-18	0.607754	0.364	0.195	3.48519e-14	NSC2	SRRM2
B4GAT1	3.11092e-18	0.419382	0.167	0.061	4.25512e-14	NSC2	B4GAT1
CNIH2	3.17236e-18	0.413255	0.152	0.052	4.33916e-14	NSC2	CNIH2
TUBB2B	3.35646e-18	0.704035	0.38	0.219	4.59097e-14	NSC2	TUBB2B
HES1	5.18958e-18	0.624143	0.232	0.105	7.09831e-14	NSC2	HES1
UBE2H	6.47702e-18	0.576672	0.408	0.227	8.85927e-14	NSC2	UBE2H
YWHAH	7.04762e-18	0.635456	0.275	0.132	9.63973e-14	NSC2	YWHAH
TSPAN18	7.2203e-18	0.498863	0.195	0.079	9.87592e-14	NSC2	TSPAN18
ZBTB18	7.45793e-18	0.609909	0.252	0.117	1.0201e-13	NSC2	ZBTB18
SLC22A17	7.85986e-18	0.647217	0.427	0.261	1.07507e-13	NSC2	SLC22A17
SRSF3	8.99584e-18	0.384924	0.132	0.043	1.23045e-13	NSC2	SRSF3
DKK3	1.03377e-17	0.573636	0.325	0.171	1.41399e-13	NSC2	DKK3
PPIG	1.39293e-17	0.488419	0.245	0.111	1.90525e-13	NSC2	PPIG
TMEM132B	1.78453e-17	0.742206	0.625	0.504	2.44088e-13	NSC2	TMEM132B
UBE4A	1.87165e-17	0.465314	0.197	0.08	2.56004e-13	NSC2	UBE4A
NHS	1.99592e-17	0.650725	0.252	0.118	2.73002e-13	NSC2	NHS
SMAD9	2.10414e-17	0.533306	0.299	0.15	2.87804e-13	NSC2	SMAD9
MAP1B	2.20019e-17	0.657802	0.586	0.442	3.00942e-13	NSC2	MAP1B
CPE	2.27212e-17	0.584111	0.905	0.911	3.10781e-13	NSC2	CPE
TBL1XR1	2.31955e-17	0.658246	0.484	0.318	3.17268e-13	NSC2	TBL1XR1
SLC25A3	3.18058e-17	0.41787	0.154	0.055	4.35039e-13	NSC2	SLC25A3
CELF2	3.45403e-17	0.427035	0.672	0.415	4.72442e-13	NSC2	CELF2
OLFM1	3.55742e-17	0.548517	0.312	0.159	4.86584e-13	NSC2	OLFM1
RSRC2	6.05345e-17	0.470366	0.195	0.08	8.27991e-13	NSC2	RSRC2
CD58	7.10069e-17	0.456549	0.156	0.058	9.71232e-13	NSC2	CD58
CREB5	7.15369e-17	0.655116	0.243	0.113	9.78482e-13	NSC2	CREB5
PSMD2	7.26031e-17	0.396755	0.132	0.044	9.93065e-13	NSC2	PSMD2
PDLIM3	7.31646e-17	0.607268	0.345	0.194	1.00074e-12	NSC2	PDLIM3
DIP2B	7.68264e-17	0.525651	0.458	0.272	1.05083e-12	NSC2	DIP2B
FEM1B	1.01055e-16	0.4342	0.176	0.069	1.38223e-12	NSC2	FEM1B
EIF4G2	1.08877e-16	0.542587	0.271	0.134	1.48922e-12	NSC2	EIF4G2
ANXA5	1.1444e-16	0.425115	0.167	0.064	1.56531e-12	NSC2	ANXA5
CDKN1B	1.51884e-16	0.434157	0.126	0.042	2.07746e-12	NSC2	CDKN1B
RPS3	1.64286e-16	0.467211	0.18	0.073	2.2471e-12	NSC2	RPS3
CHRDL1	1.67639e-16	0.500669	0.178	0.071	2.29296e-12	NSC2	CHRDL1
YWHAG	1.75135e-16	0.531844	0.317	0.165	2.39549e-12	NSC2	YWHAG
RNASEK	2.38375e-16	0.435815	0.176	0.07	3.2605e-12	NSC2	RNASEK
CALD1	2.51412e-16	0.537008	0.419	0.25	3.43881e-12	NSC2	CALD1
HNRNPH3	3.09685e-16	0.385861	0.158	0.06	4.23588e-12	NSC2	HNRNPH3
SYT14	4.54665e-16	0.733398	0.616	0.488	6.21891e-12	NSC2	SYT14
RPS9	4.78371e-16	0.477205	0.195	0.082	6.54316e-12	NSC2	RPS9
AKT3	5.80682e-16	0.477266	0.796	0.697	7.94257e-12	NSC2	AKT3
SEMA5B	6.68626e-16	0.475214	0.15	0.056	9.14546e-12	NSC2	SEMA5B
TUBA4A	7.27273e-16	0.380983	0.134	0.047	9.94764e-12	NSC2	TUBA4A
LMO2	1.00328e-15	0.673643	0.315	0.173	1.37229e-11	NSC2	LMO2
RHOJ	1.04507e-15	0.490336	0.191	0.08	1.42945e-11	NSC2	RHOJ
PTCH1	1.85188e-15	0.840392	0.564	0.428	2.53299e-11	NSC2	PTCH1
ATP5F1A	2.1058e-15	0.444693	0.182	0.076	2.88031e-11	NSC2	ATP5F1A
DCTN3	2.14262e-15	0.334531	0.121	0.041	2.93067e-11	NSC2	DCTN3
ZHX3	3.7661e-15	0.470173	0.831	0.755	5.15127e-11	NSC2	ZHX3
DACH1	4.36475e-15	0.544141	0.169	0.069	5.9701e-11	NSC2	DACH1
LAMA4	4.87472e-15	0.512083	0.221	0.102	6.66764e-11	NSC2	LAMA4
BSCL2	5.09329e-15	0.471766	0.252	0.123	6.9666e-11	NSC2	BSCL2
IGF1R	5.22399e-15	0.633082	0.466	0.309	7.14538e-11	NSC2	IGF1R
DSCAM	5.36221e-15	0.670726	0.529	0.379	7.33444e-11	NSC2	DSCAM
NEFL	6.15406e-15	0.394294	0.137	0.05	8.41752e-11	NSC2	NEFL
PLP1	6.2647e-15	0.620483	0.44	0.286	8.56885e-11	NSC2	PLP1
NPDC1	6.29474e-15	0.5149	0.256	0.129	8.60994e-11	NSC2	NPDC1
CCNH	6.71614e-15	0.574518	0.304	0.166	9.18633e-11	NSC2	CCNH
CKB	6.77274e-15	0.675806	0.592	0.463	9.26376e-11	NSC2	CKB
CCDC80	8.28383e-15	0.56548	0.215	0.101	1.13306e-10	NSC2	CCDC80
GPM6B	8.30175e-15	0.440976	0.796	0.702	1.13551e-10	NSC2	GPM6B
CD81	9.95697e-15	0.521798	0.486	0.329	1.36191e-10	NSC2	CD81
SPINT2	1.11473e-14	0.335536	0.13	0.046	1.52473e-10	NSC2	SPINT2
ARF5	1.18756e-14	0.436268	0.178	0.076	1.62435e-10	NSC2	ARF5
PSAP	1.30923e-14	0.616825	0.453	0.309	1.79076e-10	NSC2	PSAP
WSCD1	2.09737e-14	0.508683	0.23	0.111	2.86878e-10	NSC2	WSCD1
KIF1B1	2.12254e-14	0.307662	0.638	0.388	2.90321e-10	NSC2	KIF1B
DVL3	2.44218e-14	0.307051	0.113	0.038	3.34041e-10	NSC2	DVL3
IFIT1	2.57573e-14	0.328232	0.108	0.036	3.52309e-10	NSC2	IFIT1
HPCA	2.62423e-14	0.376528	0.128	0.046	3.58943e-10	NSC2	HPCA
FGFR31	3.40201e-14	0.463646	0.401	0.24	4.65328e-10	NSC2	FGFR3
DDR1	3.75816e-14	0.543239	0.312	0.175	5.14041e-10	NSC2	DDR1
PAQR4	3.889e-14	0.361383	0.113	0.038	5.31937e-10	NSC2	PAQR4
PGK1	4.05472e-14	0.387215	0.141	0.054	5.54605e-10	NSC2	PGK1
PDE5A	4.34336e-14	0.59216	0.28	0.151	5.94084e-10	NSC2	PDE5A
RAN	6.01803e-14	0.427928	0.134	0.051	8.23147e-10	NSC2	RAN
FKBP1A	6.85708e-14	0.450276	0.189	0.084	9.37912e-10	NSC2	FKBP1A
CASC3	8.06407e-14	0.398927	0.191	0.086	1.103e-09	NSC2	CASC3
RING1	9.41733e-14	0.289933	0.108	0.036	1.2881e-09	NSC2	RING1
C1QTNF4	9.67695e-14	0.382298	0.176	0.076	1.32361e-09	NSC2	C1QTNF4
HHIP	9.80529e-14	0.601123	0.167	0.073	1.34117e-09	NSC2	HHIP
IL6ST	1.06462e-13	0.493043	0.273	0.145	1.45619e-09	NSC2	IL6ST
SRPX	1.11054e-13	0.557365	0.234	0.116	1.519e-09	NSC2	SRPX
GNAO1	1.13563e-13	0.504552	0.605	0.453	1.55332e-09	NSC2	GNAO1
RPLP0	1.14545e-13	0.394802	0.143	0.056	1.56674e-09	NSC2	RPLP0
SRSF11	1.21503e-13	0.466297	0.286	0.153	1.66191e-09	NSC2	SRSF11
PUM2	1.3885e-13	0.515792	0.367	0.225	1.89918e-09	NSC2	PUM2
REST	1.44536e-13	0.412685	0.176	0.076	1.97696e-09	NSC2	REST
EIF4A2	1.84882e-13	0.514305	0.336	0.196	2.52882e-09	NSC2	EIF4A2
HNRNPC	1.92129e-13	0.503315	0.377	0.227	2.62794e-09	NSC2	HNRNPC
GPR37L1	1.93141e-13	0.488687	0.262	0.137	2.64179e-09	NSC2	GPR37L1
TUBB4A	1.94419e-13	0.437374	0.163	0.068	2.65926e-09	NSC2	TUBB4A
PSMB1	1.94881e-13	0.359255	0.121	0.044	2.66558e-09	NSC2	PSMB1
CTTNBP2	2.06401e-13	0.522313	0.453	0.303	2.82316e-09	NSC2	CTTNBP2
MARCKSL1	2.14737e-13	0.376786	0.13	0.05	2.93718e-09	NSC2	MARCKSL1
SRSF10	2.20438e-13	0.383524	0.15	0.061	3.01515e-09	NSC2	SRSF10
SUB1	2.63436e-13	0.489319	0.262	0.14	3.60328e-09	NSC2	SUB1
STMN3	2.95249e-13	0.444094	0.176	0.078	4.03842e-09	NSC2	STMN3
DCAF10	2.95597e-13	0.498124	0.278	0.151	4.04317e-09	NSC2	DCAF10
TMBIM6	2.9788e-13	0.507176	0.315	0.177	4.0744e-09	NSC2	TMBIM6
TERF2IP	3.93125e-13	0.472035	0.226	0.112	5.37716e-09	NSC2	TERF2IP
ARHGAP5	4.45578e-13	0.529276	0.681	0.578	6.09462e-09	NSC2	ARHGAP5
ARHGEF28	4.55553e-13	0.404474	0.145	0.059	6.23106e-09	NSC2	ARHGEF28
SNAP25	4.75039e-13	0.487556	0.575	0.447	6.49758e-09	NSC2	SNAP25
SSBP4	4.82061e-13	0.330455	0.121	0.045	6.59363e-09	NSC2	SSBP4
CDK6	6.49983e-13	0.607641	0.249	0.134	8.89047e-09	NSC2	CDK6
SRSF6	7.02608e-13	0.34547	0.139	0.055	9.61028e-09	NSC2	SRSF6
PRDX2	7.0441e-13	0.299997	0.108	0.038	9.63492e-09	NSC2	PRDX2
SMYD2	7.87362e-13	0.391732	0.115	0.042	1.07695e-08	NSC2	SMYD2
RTN1	8.84336e-13	0.484712	0.603	0.47	1.20959e-08	NSC2	RTN1
PCP4	1.29559e-12	0.35222	0.141	0.057	1.77211e-08	NSC2	PCP4
CFAP54	1.33237e-12	0.438507	0.184	0.085	1.82242e-08	NSC2	CFAP54
CTSD	1.55291e-12	0.426931	0.193	0.091	2.12407e-08	NSC2	CTSD
USP7	1.5848e-12	0.352911	0.156	0.067	2.16769e-08	NSC2	USP7
BEX2	1.76997e-12	0.379898	0.161	0.07	2.42097e-08	NSC2	BEX2
CST3	1.83696e-12	0.569725	0.395	0.261	2.51259e-08	NSC2	CST3
TXNIP	2.04025e-12	0.469721	0.43	0.28	2.79065e-08	NSC2	TXNIP
UCHL1	2.23402e-12	0.483973	0.295	0.165	3.05569e-08	NSC2	UCHL1
DDOST	2.42899e-12	0.312624	0.124	0.047	3.32237e-08	NSC2	DDOST
ATP5IF1	2.46264e-12	0.346673	0.145	0.06	3.3684e-08	NSC2	ATP5IF1
CALR	2.53356e-12	0.292829	0.121	0.046	3.4654e-08	NSC2	CALR
SCG3	2.70359e-12	0.500888	0.347	0.213	3.69797e-08	NSC2	SCG3
VAPA	2.7927e-12	0.385536	0.176	0.08	3.81986e-08	NSC2	VAPA
APPL1	3.23214e-12	0.358617	0.141	0.058	4.42092e-08	NSC2	APPL1
APP	3.62636e-12	0.4559	0.748	0.683	4.96014e-08	NSC2	APP
SYT4	3.93089e-12	0.433343	0.132	0.054	5.37667e-08	NSC2	SYT4
TMF1	3.9792e-12	0.31143	0.126	0.049	5.44275e-08	NSC2	TMF1
HOPX	4.45823e-12	0.594362	0.534	0.412	6.09797e-08	NSC2	HOPX
MLC1	4.95875e-12	0.55044	0.521	0.388	6.78258e-08	NSC2	MLC1
KLHDC3	5.20225e-12	0.316299	0.111	0.041	7.11563e-08	NSC2	KLHDC3
LIN7C	5.89637e-12	0.280658	0.102	0.036	8.06505e-08	NSC2	LIN7C
NCDN	6.00395e-12	0.366572	0.169	0.077	8.21221e-08	NSC2	NCDN
TRIO	6.16134e-12	0.470778	0.69	0.599	8.42748e-08	NSC2	TRIO
AGPAT5	6.30648e-12	0.551358	0.458	0.328	8.626e-08	NSC2	AGPAT5
DSTN	8.11842e-12	0.467041	0.226	0.118	1.11044e-07	NSC2	DSTN
C14orf132	9.75417e-12	0.296996	0.13	0.053	1.33418e-07	NSC2	C14orf132
VSNL1	1.00028e-11	0.384871	0.191	0.091	1.36819e-07	NSC2	VSNL1
TMEM30A	1.25447e-11	0.423663	0.174	0.082	1.71586e-07	NSC2	TMEM30A
ERH	1.30856e-11	0.373151	0.141	0.06	1.78985e-07	NSC2	ERH
HNRNPA2B1	1.35964e-11	0.442574	0.623	0.499	1.85972e-07	NSC2	HNRNPA2B1
CREBZF	1.39155e-11	0.275215	0.111	0.041	1.90336e-07	NSC2	CREBZF
N4BP2	2.35624e-11	0.435585	0.258	0.143	3.22287e-07	NSC2	N4BP2
CCNG2	2.40714e-11	0.363453	0.13	0.054	3.29248e-07	NSC2	CCNG2
NR2E1	2.5585e-11	0.385793	0.184	0.09	3.49952e-07	NSC2	NR2E1
PAN3	2.60848e-11	0.509182	0.36	0.232	3.56789e-07	NSC2	PAN3
LMO4	3.2932e-11	0.401346	0.234	0.124	4.50444e-07	NSC2	LMO4
C1QL2	3.32383e-11	0.425499	0.18	0.088	4.54634e-07	NSC2	C1QL2
WWTR1	3.48417e-11	0.460265	0.195	0.098	4.76564e-07	NSC2	WWTR1
HBP1	3.6867e-11	0.431102	0.267	0.153	5.04267e-07	NSC2	HBP1
PLK2	3.97405e-11	0.276742	0.108	0.041	5.43571e-07	NSC2	PLK2
POMP	4.00033e-11	0.300435	0.124	0.05	5.47165e-07	NSC2	POMP
COX1	4.85176e-11	0.418741	0.239	0.129	6.63624e-07	NSC2	COX1
TRIR	5.01461e-11	0.372505	0.184	0.091	6.85898e-07	NSC2	TRIR
TMEM131L	5.68067e-11	0.330515	0.117	0.047	7.77003e-07	NSC2	TMEM131L
SALL1	6.68344e-11	0.348793	0.117	0.047	9.1416e-07	NSC2	SALL1
PHPT1	6.77583e-11	0.313259	0.141	0.062	9.26798e-07	NSC2	PHPT1
DYNLRB1	8.03737e-11	0.412953	0.2	0.102	1.09935e-06	NSC2	DYNLRB1
SEZ6L2	8.2425e-11	0.327269	0.137	0.059	1.12741e-06	NSC2	SEZ6L2
TMEM108	9.1054e-11	0.540729	0.302	0.183	1.24544e-06	NSC2	TMEM108
FAM107B	1.00762e-10	0.296619	0.113	0.045	1.37822e-06	NSC2	FAM107B
PTPN12	1.07017e-10	0.425274	0.358	0.229	1.46377e-06	NSC2	PTPN12
VAMP2	1.14116e-10	0.381814	0.145	0.065	1.56088e-06	NSC2	VAMP2
ATP6V1G1	1.15589e-10	0.274604	0.108	0.042	1.58103e-06	NSC2	ATP6V1G1
SNCAIP	1.19558e-10	0.383168	0.165	0.078	1.63531e-06	NSC2	SNCAIP
NUCKS1	1.35089e-10	0.480207	0.423	0.296	1.84774e-06	NSC2	NUCKS1
SPATA6	1.3894e-10	0.491489	0.399	0.27	1.90042e-06	NSC2	SPATA6
CACHD1	1.47045e-10	0.50233	0.529	0.411	2.01129e-06	NSC2	CACHD1
PNMA8A	1.50391e-10	0.287204	0.115	0.046	2.05705e-06	NSC2	PNMA8A
BCLAF1	2.20281e-10	0.421485	0.369	0.238	3.013e-06	NSC2	BCLAF1
IREB2	2.42143e-10	0.380451	0.226	0.122	3.31203e-06	NSC2	IREB2
CLCN3	2.46991e-10	0.433314	0.341	0.214	3.37834e-06	NSC2	CLCN3
SARAF	2.50411e-10	0.32614	0.106	0.042	3.42512e-06	NSC2	SARAF
PTGES3	2.64762e-10	0.45233	0.306	0.189	3.62141e-06	NSC2	PTGES3
CLDND1	2.72643e-10	0.324285	0.128	0.055	3.72921e-06	NSC2	CLDND1
ATP6V0B	2.91917e-10	0.324499	0.15	0.069	3.99283e-06	NSC2	ATP6V0B
KIAA1143	3.39626e-10	0.308245	0.102	0.04	4.6454e-06	NSC2	KIAA1143
MDH1	3.45206e-10	0.368075	0.299	0.179	4.72173e-06	NSC2	MDH1
COPS8	3.54834e-10	0.292381	0.121	0.051	4.85342e-06	NSC2	COPS8
STARD13	3.79065e-10	0.510838	0.308	0.195	5.18485e-06	NSC2	STARD13
NTNG2	3.9511e-10	0.407876	0.117	0.05	5.40432e-06	NSC2	NTNG2
CA8	4.40641e-10	0.520274	0.336	0.219	6.02708e-06	NSC2	CA8
ARL8A	4.45223e-10	0.383548	0.189	0.098	6.08976e-06	NSC2	ARL8A
SCOC	4.48297e-10	0.253772	0.119	0.05	6.13181e-06	NSC2	SCOC
FUBP3	4.83207e-10	0.347459	0.193	0.101	6.6093e-06	NSC2	FUBP3
AK6	5.06969e-10	0.353877	0.158	0.076	6.93432e-06	NSC2	AK6
SEZ6L	5.34061e-10	0.380555	0.189	0.097	7.30488e-06	NSC2	SEZ6L
PTP4A2	5.37077e-10	0.394962	0.262	0.152	7.34613e-06	NSC2	PTP4A2
CNRIP1	5.49097e-10	0.394351	0.178	0.09	7.51055e-06	NSC2	CNRIP1
FAU	5.7101e-10	0.280211	0.104	0.041	7.81028e-06	NSC2	FAU
RTN3	5.81912e-10	0.397648	0.636	0.518	7.95939e-06	NSC2	RTN3
EPB41L4A	6.14827e-10	0.43233	0.217	0.12	8.40961e-06	NSC2	EPB41L4A
ARHGEF33	6.30291e-10	0.422553	0.189	0.099	8.62112e-06	NSC2	ARHGEF33
CERS6	6.3306e-10	0.352383	0.202	0.106	8.65899e-06	NSC2	CERS6
BMPR1B	6.81083e-10	0.443566	0.525	0.389	9.31586e-06	NSC2	BMPR1B
GNAI1	7.24949e-10	0.2635	0.13	0.057	9.91585e-06	NSC2	GNAI1
LRPAP1	7.27774e-10	0.300882	0.154	0.073	9.95449e-06	NSC2	LRPAP1
FIS1	8.01587e-10	0.332283	0.137	0.062	1.09641e-05	NSC2	FIS1
SUMO1	8.36947e-10	0.388993	0.187	0.097	1.14478e-05	NSC2	SUMO1
CHERP	8.64384e-10	0.261998	0.106	0.043	1.1823e-05	NSC2	CHERP
ZFP36L2	8.95418e-10	0.38569	0.182	0.094	1.22475e-05	NSC2	ZFP36L2
COX8A	9.86543e-10	0.394763	0.213	0.116	1.34939e-05	NSC2	COX8A
RAB3A	9.90403e-10	0.324655	0.121	0.053	1.35467e-05	NSC2	RAB3A
FKBP8	1.07999e-09	0.372394	0.169	0.084	1.47721e-05	NSC2	FKBP8
LARP1	1.08857e-09	0.365664	0.273	0.158	1.48894e-05	NSC2	LARP1
SELENOT	1.19341e-09	0.419328	0.18	0.093	1.63235e-05	NSC2	SELENOT
UNC50	1.20301e-09	0.275253	0.113	0.047	1.64548e-05	NSC2	UNC50
SRSF9	1.31315e-09	0.310327	0.139	0.064	1.79613e-05	NSC2	SRSF9
RAB21	1.37445e-09	0.43005	0.232	0.133	1.87998e-05	NSC2	RAB21
BROX	1.54878e-09	0.299439	0.111	0.046	2.11843e-05	NSC2	BROX
CISD2	1.56192e-09	0.251081	0.102	0.041	2.1364e-05	NSC2	CISD2
EMX2	1.64257e-09	0.318796	0.15	0.072	2.2467e-05	NSC2	EMX2
TSPAN7	1.79338e-09	0.423986	0.772	0.727	2.45299e-05	NSC2	TSPAN7
SERINC3	1.94695e-09	0.449823	0.239	0.14	2.66303e-05	NSC2	SERINC3
JPT1	1.98557e-09	0.336367	0.126	0.057	2.71586e-05	NSC2	JPT1
PRDX5	2.02699e-09	0.298714	0.117	0.051	2.77252e-05	NSC2	PRDX5
FYTTD1	2.22927e-09	0.39863	0.182	0.096	3.0492e-05	NSC2	FYTTD1
PKP2	2.2766e-09	0.467868	0.206	0.114	3.11394e-05	NSC2	PKP2
DDX6	2.39845e-09	0.429046	0.308	0.196	3.2806e-05	NSC2	DDX6
SPCS2	2.45707e-09	0.345712	0.193	0.102	3.36078e-05	NSC2	SPCS2
RPS23	2.52392e-09	0.311061	0.108	0.046	3.45222e-05	NSC2	RPS23
EPHA4	2.65551e-09	0.474604	0.421	0.3	3.63221e-05	NSC2	EPHA4
RCHY1	2.7172e-09	0.374163	0.356	0.233	3.71659e-05	NSC2	RCHY1
VEZF1	2.72056e-09	0.368575	0.21	0.116	3.72118e-05	NSC2	VEZF1
SLC9A6	2.76092e-09	0.412518	0.232	0.135	3.77638e-05	NSC2	SLC9A6
CSTB	3.1247e-09	0.316549	0.148	0.071	4.27396e-05	NSC2	CSTB
SAP18	3.21479e-09	0.337677	0.13	0.06	4.39718e-05	NSC2	SAP18
CMAS	3.25548e-09	0.292736	0.169	0.086	4.45285e-05	NSC2	CMAS
CCNI	3.30398e-09	0.39019	0.306	0.195	4.51918e-05	NSC2	CCNI
TIAM2	3.32172e-09	0.395156	0.215	0.12	4.54345e-05	NSC2	TIAM2
PJA2	3.35615e-09	0.450678	0.323	0.212	4.59054e-05	NSC2	PJA2
TMEM184B	3.48104e-09	0.406217	0.273	0.166	4.76137e-05	NSC2	TMEM184B
SRI	3.69837e-09	0.352091	0.204	0.112	5.05863e-05	NSC2	SRI
SNU13	3.81865e-09	0.342774	0.154	0.076	5.22315e-05	NSC2	SNU13
CLU	3.82328e-09	0.500001	0.709	0.655	5.22948e-05	NSC2	CLU
CD9	3.918e-09	0.307122	0.102	0.042	5.35905e-05	NSC2	CD9
SEMA3A	4.15151e-09	0.283827	0.156	0.076	5.67844e-05	NSC2	SEMA3A
VDAC3	4.51817e-09	0.304735	0.176	0.09	6.17996e-05	NSC2	VDAC3
ATP6AP2	4.57003e-09	0.269049	0.156	0.077	6.25088e-05	NSC2	ATP6AP2
SORT1	4.61669e-09	0.443657	0.286	0.177	6.3147e-05	NSC2	SORT1
CHGB	4.6452e-09	0.391023	0.18	0.095	6.35371e-05	NSC2	CHGB
RPS7	4.7115e-09	0.271304	0.108	0.046	6.44438e-05	NSC2	RPS7
CD164	5.1687e-09	0.279237	0.124	0.056	7.06975e-05	NSC2	CD164
ACTR2	5.17564e-09	0.42883	0.315	0.204	7.07924e-05	NSC2	ACTR2
CALY	5.31098e-09	0.350849	0.13	0.061	7.26435e-05	NSC2	CALY
GSDME	5.35778e-09	0.368668	0.139	0.067	7.32837e-05	NSC2	GSDME
CLTA	5.77074e-09	0.297619	0.145	0.071	7.89321e-05	NSC2	CLTA
ZEB1	6.31082e-09	0.375302	0.679	0.598	8.63194e-05	NSC2	ZEB1
IMPAD1	6.33385e-09	0.346258	0.206	0.114	8.66343e-05	NSC2	IMPAD1
ISCA1	6.93761e-09	0.355721	0.143	0.07	9.48926e-05	NSC2	ISCA1
LDB2	7.96611e-09	0.482271	0.514	0.405	0.00010896	NSC2	LDB2
CNOT6L	7.97687e-09	0.312969	0.134	0.064	0.000109108	NSC2	CNOT6L
SAMD4A	8.51753e-09	0.558996	0.516	0.41	0.000116503	NSC2	SAMD4A
DCLK1	9.24846e-09	0.284452	0.939	0.881	0.0001265	NSC2	DCLK1
RTN4	9.61664e-09	0.360892	0.685	0.632	0.000131536	NSC2	RTN4
PALLD	9.7685e-09	0.409225	0.523	0.401	0.000133613	NSC2	PALLD
ARRDC3	1.03637e-08	0.309089	0.113	0.05	0.000141755	NSC2	ARRDC3
SYNRG	1.10062e-08	0.285916	0.174	0.09	0.000150543	NSC2	SYNRG
TOR1AIP2	1.1045e-08	0.250491	0.108	0.047	0.000151074	NSC2	TOR1AIP2
FAM184B	1.13295e-08	0.409812	0.215	0.123	0.000154965	NSC2	FAM184B
ATP1B1	1.15884e-08	0.448267	0.443	0.333	0.000158506	NSC2	ATP1B1
FAM162A	1.16709e-08	0.273377	0.15	0.075	0.000159634	NSC2	FAM162A
MPPED2	1.18059e-08	0.487926	0.497	0.398	0.000161482	NSC2	MPPED2
FZD3	1.23955e-08	0.443532	0.289	0.186	0.000169545	NSC2	FZD3
EIF2B1	1.37592e-08	0.310257	0.152	0.076	0.000188198	NSC2	EIF2B1
USP44	1.59088e-08	0.287634	0.121	0.056	0.000217601	NSC2	USP44
SCG5	1.61623e-08	0.309665	0.171	0.091	0.000221068	NSC2	SCG5
OGFRL1	1.61935e-08	0.344239	0.234	0.138	0.000221495	NSC2	OGFRL1
SHROOM4	1.7049e-08	0.398478	0.148	0.074	0.000233196	NSC2	SHROOM4
ZFP36L1	1.81856e-08	0.394703	0.456	0.332	0.000248743	NSC2	ZFP36L1
TSPAN11	1.89389e-08	0.259024	0.108	0.048	0.000259046	NSC2	TSPAN11
UBL3	1.92675e-08	0.424703	0.291	0.189	0.00026354	NSC2	UBL3
GABARAPL1	2.03001e-08	0.339884	0.148	0.074	0.000277665	NSC2	GABARAPL1
DAAM1	2.12148e-08	0.378381	0.51	0.394	0.000290176	NSC2	DAAM1
TOP2B	2.25693e-08	0.386462	0.371	0.259	0.000308703	NSC2	TOP2B
SLC24A5	2.27623e-08	0.29315	0.111	0.05	0.000311343	NSC2	SLC24A5
WDR6	2.30639e-08	0.284874	0.104	0.046	0.000315468	NSC2	WDR6
FBXL16	2.45682e-08	0.318424	0.117	0.054	0.000336044	NSC2	FBXL16
IRS2	2.50987e-08	0.254933	0.102	0.044	0.0003433	NSC2	IRS2
DNAJB6	3.19088e-08	0.3817	0.195	0.111	0.000436449	NSC2	DNAJB6
BTBD3	3.22725e-08	0.355965	0.193	0.107	0.000441423	NSC2	BTBD3
TXNL4A	3.23731e-08	0.315805	0.128	0.061	0.0004428	NSC2	TXNL4A
ENO2	3.60212e-08	0.300439	0.121	0.058	0.000492697	NSC2	ENO2
ATP1A1	3.83723e-08	0.362281	0.219	0.129	0.000524856	NSC2	ATP1A1
FGFR2	3.99931e-08	0.44099	0.694	0.633	0.000547025	NSC2	FGFR2
COL9A1	4.12194e-08	0.403847	0.262	0.166	0.000563799	NSC2	COL9A1
MICAL3	4.19595e-08	0.349282	0.191	0.107	0.000573922	NSC2	MICAL3
TUBB4B	4.2622e-08	0.28031	0.106	0.048	0.000582984	NSC2	TUBB4B
RAPH1	4.31298e-08	0.389194	0.486	0.374	0.00058993	NSC2	RAPH1
HMGN3	4.42984e-08	0.388314	0.356	0.244	0.000605913	NSC2	HMGN3
TULP3	4.59755e-08	0.451541	0.434	0.326	0.000628852	NSC2	TULP3
ACACA	4.83717e-08	0.283882	0.308	0.193	0.000661629	NSC2	ACACA
VPS29	4.84412e-08	0.307923	0.121	0.058	0.000662579	NSC2	VPS29
KCNH8	5.17893e-08	0.394558	0.134	0.068	0.000708374	NSC2	KCNH8
2021-03-06	5.19539e-08	0.447911	0.497	0.4	0.000710626	NSC2	2021-03-06
EIF4H	5.46298e-08	0.322913	0.208	0.12	0.000747227	NSC2	EIF4H
CHD7	6.08406e-08	0.448227	0.386	0.277	0.000832178	NSC2	CHD7
OSBPL5	7.5297e-08	0.356102	0.163	0.088	0.00102991	NSC2	OSBPL5
EIF4G1	7.63922e-08	0.264153	0.121	0.058	0.00104489	NSC2	EIF4G1
TSC22D1	7.80815e-08	0.324958	0.644	0.547	0.001068	NSC2	TSC22D1
PPP2CB	8.04287e-08	0.347618	0.228	0.138	0.0011001	NSC2	PPP2CB
PPP1CC	8.72619e-08	0.264899	0.128	0.063	0.00119357	NSC2	PPP1CC
GLO1	8.75891e-08	0.368328	0.226	0.136	0.00119804	NSC2	GLO1
KIF5A	8.79869e-08	0.301604	0.145	0.075	0.00120348	NSC2	KIF5A
FEM1C	9.21666e-08	0.281597	0.158	0.084	0.00126066	NSC2	FEM1C
CSDC2	9.28583e-08	0.296117	0.121	0.059	0.00127012	NSC2	CSDC2
MIF	1.07325e-07	0.285875	0.113	0.053	0.00146799	NSC2	MIF
ATP5MC2	1.08177e-07	0.291684	0.182	0.103	0.00147964	NSC2	ATP5MC2
DPYSL5	1.1042e-07	0.315455	0.241	0.147	0.00151033	NSC2	DPYSL5
NUAK1	1.12436e-07	0.367475	0.236	0.144	0.0015379	NSC2	NUAK1
LAPTM4B	1.13108e-07	0.253978	0.145	0.074	0.00154709	NSC2	LAPTM4B
UGP2	1.17832e-07	0.389547	0.401	0.298	0.0016117	NSC2	UGP2
RNF11	1.2333e-07	0.34486	0.184	0.105	0.00168691	NSC2	RNF11
TAPT1	1.24357e-07	0.340642	0.232	0.141	0.00170095	NSC2	TAPT1
CYC1	1.27888e-07	0.283421	0.126	0.062	0.00174926	NSC2	CYC1
SPRED2	1.29662e-07	0.37198	0.332	0.227	0.00177352	NSC2	SPRED2
TRIM23	1.30622e-07	0.353855	0.197	0.116	0.00178665	NSC2	TRIM23
NDUFA5	1.32206e-07	0.261002	0.141	0.072	0.00180831	NSC2	NDUFA5
MGAT51	1.32607e-07	0.376194	0.265	0.168	0.0018138	NSC2	MGAT5
CTNNB1	1.35816e-07	0.344091	0.306	0.204	0.0018577	NSC2	CTNNB1
CNN3	1.39495e-07	0.70623	0.401	0.294	0.00190801	NSC2	CNN3
TLE4	1.42768e-07	0.395609	0.373	0.269	0.00195278	NSC2	TLE4
CDKL3	1.48676e-07	0.358549	0.21	0.125	0.00203359	NSC2	CDKL3
AMFR	1.56592e-07	0.344697	0.221	0.136	0.00214186	NSC2	AMFR
SUCO	1.61843e-07	0.424622	0.282	0.188	0.00221369	NSC2	SUCO
GAP43	1.65406e-07	0.348735	0.15	0.079	0.00226243	NSC2	GAP43
GSAP	1.68753e-07	0.446769	0.377	0.267	0.0023082	NSC2	GSAP
LONRF2	1.81412e-07	0.41847	0.31	0.211	0.00248135	NSC2	LONRF2
NFIB	1.85866e-07	0.33749	0.761	0.733	0.00254227	NSC2	NFIB
CD200	1.92613e-07	0.311731	0.143	0.076	0.00263456	NSC2	CD200
SPIN1	2.14226e-07	0.41169	0.425	0.325	0.00293018	NSC2	SPIN1
PON2	2.27614e-07	0.41861	0.338	0.242	0.00311331	NSC2	PON2
DOK5	2.30915e-07	0.386967	0.497	0.397	0.00315846	NSC2	DOK5
RFTN1	2.51285e-07	0.263116	0.126	0.063	0.00343708	NSC2	RFTN1
MMD	2.53301e-07	0.304837	0.158	0.086	0.00346465	NSC2	MMD
AKAP121	2.55338e-07	0.412379	0.271	0.178	0.00349252	NSC2	AKAP12
SEMA3C	2.73532e-07	0.517133	0.102	0.048	0.00374137	NSC2	SEMA3C
NSA2	2.81795e-07	0.269885	0.141	0.074	0.00385439	NSC2	NSA2
SNX18	2.82121e-07	0.281864	0.148	0.079	0.00385885	NSC2	SNX18
NDUFB9	2.85784e-07	0.251159	0.113	0.054	0.00390895	NSC2	NDUFB9
GOLGA7	2.88061e-07	0.251308	0.104	0.049	0.0039401	NSC2	GOLGA7
TMEM59L	3.047e-07	0.325	0.243	0.152	0.00416769	NSC2	TMEM59L
KIF3A	3.18513e-07	0.335985	0.31	0.213	0.00435661	NSC2	KIF3A
HNRNPH1	3.44929e-07	0.359635	0.219	0.137	0.00471794	NSC2	HNRNPH1
NCOA2	3.49279e-07	0.401537	0.527	0.43	0.00477744	NSC2	NCOA2
EI24	3.51826e-07	0.296919	0.115	0.057	0.00481228	NSC2	EI24
EIF3D	3.95344e-07	0.281207	0.108	0.052	0.00540752	NSC2	EIF3D
VAT1L	3.97423e-07	0.353401	0.484	0.372	0.00543594	NSC2	VAT1L
XPO7	4.08161e-07	0.390336	0.239	0.15	0.00558282	NSC2	XPO7
TSPAN3	4.08671e-07	0.356521	0.241	0.152	0.00558981	NSC2	TSPAN3
PINK1	4.09227e-07	0.271164	0.111	0.054	0.00559741	NSC2	PINK1
DYNC1LI2	4.28232e-07	0.386104	0.273	0.184	0.00585735	NSC2	DYNC1LI2
ANKFN1	4.42596e-07	0.358478	0.356	0.253	0.00605382	NSC2	ANKFN1
RAB3GAP2	4.53253e-07	0.3684	0.414	0.31	0.00619959	NSC2	RAB3GAP2
SH3RF3	5.02862e-07	0.407898	0.479	0.387	0.00687815	NSC2	SH3RF3
COPS2	5.46984e-07	0.345403	0.143	0.078	0.00748165	NSC2	COPS2
VCP	5.68724e-07	0.283525	0.161	0.09	0.007779	NSC2	VCP
ATP6V1B2	5.78297e-07	0.331914	0.169	0.096	0.00790995	NSC2	ATP6V1B2
EEF1AKMT4-ECE2	5.81556e-07	0.309352	0.113	0.056	0.00795452	NSC2	EEF1AKMT4-ECE2
KIDINS220	6.14071e-07	0.346405	0.451	0.363	0.00839927	NSC2	KIDINS220
UBE2D3	6.19468e-07	0.380031	0.449	0.344	0.00847308	NSC2	UBE2D3
PHF19	6.21807e-07	0.357727	0.126	0.066	0.00850508	NSC2	PHF19
FBXW7	6.22556e-07	0.411219	0.471	0.379	0.00851533	NSC2	FBXW7
RAD21	6.26573e-07	0.306394	0.206	0.125	0.00857027	NSC2	RAD21
N4BP2L2	6.31891e-07	0.304515	0.547	0.442	0.00864301	NSC2	N4BP2L2
PTPRG	6.43878e-07	0.271582	0.948	0.946	0.00880696	NSC2	PTPRG
UBE2B	6.44715e-07	0.366676	0.295	0.199	0.00881841	NSC2	UBE2B
GDAP1	6.58258e-07	0.278549	0.108	0.053	0.00900365	NSC2	GDAP1
SLC16A2	6.90541e-07	0.253591	0.139	0.073	0.00944522	NSC2	SLC16A2
MAP3K1	7.80815e-07	0.355864	0.204	0.126	0.01068	NSC2	MAP3K1
LRP3	7.81992e-07	0.30083	0.182	0.108	0.0106961	NSC2	LRP3
NLGN4Y	8.82141e-07	0.44677	0.449	0.357	0.0120659	NSC2	NLGN4Y
SNCA	8.92836e-07	0.295483	0.202	0.121	0.0122122	NSC2	SNCA
AKAP6	9.04783e-07	0.321752	0.612	0.524	0.0123756	NSC2	AKAP6
RHBDD2	9.42932e-07	0.268311	0.113	0.057	0.0128974	NSC2	RHBDD2
PTTG1IP	1.08794e-06	0.299781	0.182	0.108	0.0148808	NSC2	PTTG1IP
AHNAK	1.1395e-06	0.37964	0.245	0.163	0.0155861	NSC2	AHNAK
NDFIP1	1.14812e-06	0.324586	0.416	0.307	0.015704	NSC2	NDFIP1
NTRK2	1.19578e-06	0.278753	0.816	0.772	0.0163559	NSC2	NTRK2
RPRD1A	1.19776e-06	0.331601	0.328	0.228	0.016383	NSC2	RPRD1A
AKIRIN1	1.24707e-06	0.271047	0.141	0.077	0.0170574	NSC2	AKIRIN1
EIF5	1.25918e-06	0.328473	0.21	0.131	0.0172231	NSC2	EIF5
TSC1	1.26691e-06	0.281452	0.108	0.054	0.0173289	NSC2	TSC1
UST	1.39679e-06	0.601724	0.408	0.338	0.0191053	NSC2	UST
ADAMTSL3	1.41137e-06	0.517148	0.236	0.16	0.0193047	NSC2	ADAMTSL3
NAPB	1.41955e-06	0.293535	0.297	0.2	0.0194166	NSC2	NAPB
ZBTB4	1.45789e-06	0.330209	0.356	0.257	0.019941	NSC2	ZBTB4
CBX6	1.52357e-06	0.346856	0.26	0.173	0.0208394	NSC2	CBX6
AASDHPPT	1.60862e-06	0.308654	0.258	0.171	0.0220027	NSC2	AASDHPPT
CAMKV	1.69201e-06	0.266757	0.132	0.071	0.0231433	NSC2	CAMKV
EIF1B	1.74554e-06	0.29719	0.141	0.078	0.0238755	NSC2	EIF1B
DPP7	1.78109e-06	0.351022	0.217	0.137	0.0243617	NSC2	DPP7
MLF2	1.80596e-06	0.271218	0.13	0.07	0.0247019	NSC2	MLF2
RAB12	1.81929e-06	0.291927	0.208	0.129	0.0248842	NSC2	RAB12
TMEM167A	1.82354e-06	0.258209	0.113	0.058	0.0249424	NSC2	TMEM167A
KCTD6	1.85378e-06	0.260325	0.143	0.079	0.025356	NSC2	KCTD6
MGST3	1.92544e-06	0.263733	0.219	0.136	0.0263362	NSC2	MGST3
KLHL42	2.13372e-06	0.252445	0.152	0.085	0.029185	NSC2	KLHL42
LASP1	2.14417e-06	0.287923	0.161	0.092	0.0293279	NSC2	LASP1
ZCCHC8	2.18341e-06	0.257855	0.117	0.061	0.0298646	NSC2	ZCCHC8
LAMP2	2.19181e-06	0.314505	0.226	0.145	0.0299796	NSC2	LAMP2
FAM171B1	2.23448e-06	0.425971	0.555	0.498	0.0305632	NSC2	FAM171B
ADAR	2.44368e-06	0.274285	0.206	0.128	0.0334247	NSC2	ADAR
SLC25A46	2.51564e-06	0.29732	0.174	0.103	0.0344089	NSC2	SLC25A46
SCAMP1	2.53545e-06	0.359148	0.284	0.2	0.0346798	NSC2	SCAMP1
FRMD4B	2.61895e-06	0.409926	0.299	0.214	0.035822	NSC2	FRMD4B
BMPER	2.65491e-06	0.397107	0.152	0.087	0.0363138	NSC2	BMPER
WBP2	2.71643e-06	0.288064	0.184	0.113	0.0371554	NSC2	WBP2
NDRG1	2.81224e-06	0.253263	0.137	0.075	0.0384658	NSC2	NDRG1
TMEM59	2.86553e-06	0.298271	0.156	0.091	0.0391947	NSC2	TMEM59
ABCA8	2.92625e-06	0.313152	0.23	0.149	0.0400253	NSC2	ABCA8
BRD8	2.95206e-06	0.332771	0.215	0.138	0.0403783	NSC2	BRD8
NSG2	2.978e-06	0.323191	0.197	0.122	0.040733	NSC2	NSG2
SEC11C	3.17423e-06	0.250723	0.124	0.066	0.0434171	NSC2	SEC11C
BRAT1	3.43146e-06	0.271792	0.141	0.079	0.0469355	NSC2	BRAT1
LYPD6	3.60846e-06	0.298683	0.111	0.058	0.0493565	NSC2	LYPD6
LRP8	3.63981e-06	0.28405	0.182	0.111	0.0497853	NSC2	LRP8
STARD7	3.67029e-06	0.279973	0.148	0.083	0.0502022	NSC2	STARD7
PEG3	3.7024e-06	0.28031	0.226	0.145	0.0506414	NSC2	PEG3
AMMECR1	3.7676e-06	0.31611	0.262	0.176	0.0515333	NSC2	AMMECR1
SP4	3.91952e-06	0.308053	0.178	0.107	0.0536112	NSC2	SP4
CCT7	3.98959e-06	0.269272	0.124	0.067	0.0545696	NSC2	CCT7
FNDC3A	4.28479e-06	0.318814	0.403	0.306	0.0586073	NSC2	FNDC3A
MTPN	4.35434e-06	0.28203	0.165	0.097	0.0595587	NSC2	MTPN
REEP5	4.51918e-06	0.355515	0.247	0.165	0.0618133	NSC2	REEP5
THRA	4.56234e-06	0.367486	0.197	0.125	0.0624037	NSC2	THRA
YIPF6	4.89065e-06	0.286904	0.121	0.066	0.0668943	NSC2	YIPF6
OCIAD1	5.00691e-06	0.314778	0.321	0.23	0.0684845	NSC2	OCIAD1
CRB1	5.12066e-06	0.300981	0.685	0.631	0.0700403	NSC2	CRB1
VDAC1	5.23418e-06	0.293612	0.187	0.115	0.0715931	NSC2	VDAC1
CDK17	5.24501e-06	0.359482	0.304	0.218	0.0717412	NSC2	CDK17
HERPUD2	5.42268e-06	0.303067	0.308	0.216	0.0741714	NSC2	HERPUD2
MYO1E	5.88773e-06	0.379859	0.36	0.266	0.0805323	NSC2	MYO1E
SERBP1	5.91182e-06	0.269953	0.163	0.097	0.0808618	NSC2	SERBP1
APLP1	6.72874e-06	0.343136	0.143	0.084	0.0920357	NSC2	APLP1
GNAI2	6.95505e-06	0.300167	0.213	0.137	0.0951311	NSC2	GNAI2
MID1	7.37703e-06	0.303203	0.332	0.239	0.100903	NSC2	MID1
SEL1L	7.54124e-06	0.304679	0.204	0.131	0.103149	NSC2	SEL1L
SNRNP200	8.10071e-06	0.254846	0.148	0.086	0.110802	NSC2	SNRNP200
WASL	8.15186e-06	0.291843	0.282	0.196	0.111501	NSC2	WASL
WDR82	8.17431e-06	0.320146	0.156	0.093	0.111808	NSC2	WDR82
WASF1	8.24661e-06	0.347585	0.247	0.168	0.112797	NSC2	WASF1
PLPPR4	8.3217e-06	0.306602	0.291	0.205	0.113824	NSC2	PLPPR4
RSBN1	8.57333e-06	0.336909	0.178	0.111	0.117266	NSC2	RSBN1
RBPJ	9.06848e-06	0.32896	0.399	0.311	0.124039	NSC2	RBPJ
KLHL5	9.30748e-06	0.294262	0.382	0.288	0.127308	NSC2	KLHL5
RASAL2	9.65029e-06	0.286477	0.401	0.303	0.131997	NSC2	RASAL2
PRKACB	9.97605e-06	0.316197	0.462	0.378	0.136452	NSC2	PRKACB
S100B	1.01402e-05	0.339677	0.36	0.274	0.138697	NSC2	S100B
PHF20L1	1.03537e-05	0.335901	0.341	0.254	0.141618	NSC2	PHF20L1
STMN2	1.03643e-05	0.32782	0.137	0.079	0.141763	NSC2	STMN2
ATP2B4	1.15368e-05	0.263121	0.284	0.198	0.1578	NSC2	ATP2B4
SLC39A10	1.1675e-05	0.334043	0.369	0.286	0.15969	NSC2	SLC39A10
FLOT1	1.21151e-05	0.252603	0.178	0.11	0.16571	NSC2	FLOT1
VANGL2	1.23946e-05	0.265296	0.204	0.131	0.169533	NSC2	VANGL2
GALNT10	1.30194e-05	0.411768	0.208	0.14	0.178079	NSC2	GALNT10
BBS9	1.32361e-05	0.363402	0.319	0.239	0.181043	NSC2	BBS9
ZDBF2	1.4021e-05	0.303441	0.236	0.16	0.19178	NSC2	ZDBF2
LYN	1.43569e-05	0.254701	0.171	0.105	0.196373	NSC2	LYN
SELENOS	1.46008e-05	0.252803	0.104	0.055	0.19971	NSC2	SELENOS
ATP2B1	1.537e-05	0.314828	0.438	0.354	0.21023	NSC2	ATP2B1
PARD3B	1.55941e-05	0.274571	0.822	0.799	0.213296	NSC2	PARD3B
EXTL3	1.58085e-05	0.310429	0.176	0.111	0.216229	NSC2	EXTL3
MLLT3	1.59755e-05	0.310491	0.707	0.659	0.218512	NSC2	MLLT3
LAMC1	1.69671e-05	0.256244	0.184	0.116	0.232075	NSC2	LAMC1
KLHL8	1.70688e-05	0.283084	0.269	0.187	0.233467	NSC2	KLHL8
NRP2	1.72459e-05	0.29054	0.655	0.557	0.235889	NSC2	NRP2
SYT11	1.7342e-05	0.321866	0.239	0.163	0.237203	NSC2	SYT11
CLVS2	1.74258e-05	0.354671	0.265	0.187	0.23835	NSC2	CLVS2
HNRNPU	1.7923e-05	0.291726	0.367	0.282	0.245151	NSC2	HNRNPU
MTCH1	1.82595e-05	0.31873	0.171	0.107	0.249754	NSC2	MTCH1
FMNL3	1.99743e-05	0.266881	0.126	0.072	0.273208	NSC2	FMNL3
ATP6V1H	2.00924e-05	0.32556	0.629	0.569	0.274824	NSC2	ATP6V1H
QSER1	2.032e-05	0.25029	0.18	0.114	0.277937	NSC2	QSER1
COL19A1	2.03584e-05	0.262237	0.143	0.084	0.278462	NSC2	COL19A1
CBFB	2.06119e-05	0.276784	0.208	0.136	0.281929	NSC2	CBFB
RPS6KA5	2.19215e-05	0.406995	0.401	0.324	0.299842	NSC2	RPS6KA5
CANX	2.22525e-05	0.305169	0.245	0.169	0.30437	NSC2	CANX
PRELP	2.35166e-05	0.265623	0.126	0.072	0.32166	NSC2	PRELP
VIT	2.50098e-05	0.277828	0.23	0.154	0.342085	NSC2	VIT
SPAG16	2.54999e-05	0.38152	0.395	0.312	0.348788	NSC2	SPAG16
WDR47	2.81169e-05	0.257777	0.184	0.118	0.384584	NSC2	WDR47
ACVR2A	2.85804e-05	0.280077	0.215	0.144	0.390922	NSC2	ACVR2A
HECW1	2.89935e-05	0.304682	0.208	0.14	0.396573	NSC2	HECW1
LFNG	2.95379e-05	0.275279	0.254	0.177	0.40402	NSC2	LFNG
CASD1	3.15182e-05	0.285285	0.258	0.182	0.431105	NSC2	CASD1
EIF2S2	3.17933e-05	0.287653	0.152	0.094	0.434869	NSC2	EIF2S2
PRPF8	3.20133e-05	0.320671	0.208	0.139	0.437878	NSC2	PRPF8
ABHD17B	3.45411e-05	0.266238	0.126	0.073	0.472453	NSC2	ABHD17B
TBCA	3.46163e-05	0.272418	0.243	0.167	0.473482	NSC2	TBCA
BBX	3.4812e-05	0.308737	0.43	0.346	0.476158	NSC2	BBX
RPL22	3.5881e-05	0.276085	0.163	0.101	0.490781	NSC2	RPL22
PTPRF	3.62449e-05	0.317898	0.273	0.195	0.495758	NSC2	PTPRF
SNX3	3.68011e-05	0.325325	0.204	0.136	0.503366	NSC2	SNX3
MIGA1	3.69615e-05	0.324248	0.297	0.216	0.505559	NSC2	MIGA1
PITPNB	3.70552e-05	0.266412	0.139	0.083	0.506842	NSC2	PITPNB
RSRP1	3.82962e-05	0.308393	0.499	0.427	0.523816	NSC2	RSRP1
PPP1CB	3.97816e-05	0.352745	0.427	0.352	0.544133	NSC2	PPP1CB
KLHL28	4.0769e-05	0.255501	0.195	0.128	0.557638	NSC2	KLHL28
PPP1R17	4.10063e-05	0.297558	0.351	0.268	0.560884	NSC2	PPP1R17
PPP2R1A	4.11696e-05	0.275318	0.167	0.107	0.563118	NSC2	PPP2R1A
PHF6	4.4944e-05	0.259481	0.115	0.066	0.614744	NSC2	PHF6
SPART	4.76587e-05	0.269298	0.184	0.12	0.651876	NSC2	SPART
ZRANB2	5.01309e-05	0.284753	0.275	0.199	0.685691	NSC2	ZRANB2
OGT	5.09458e-05	0.291628	0.275	0.2	0.696837	NSC2	OGT
KDSR	5.1454e-05	0.320695	0.18	0.118	0.703788	NSC2	KDSR
ECE1	5.29898e-05	0.318856	0.449	0.369	0.724794	NSC2	ECE1
YWHAE	5.3424e-05	0.289048	0.427	0.353	0.730733	NSC2	YWHAE
NREP	5.50556e-05	0.342538	0.197	0.135	0.75305	NSC2	NREP
USP24	5.53397e-05	0.307865	0.447	0.374	0.756936	NSC2	USP24
STXBP4	5.8079e-05	0.300999	0.26	0.19	0.794405	NSC2	STXBP4
LAPTM4A	6.22544e-05	0.258514	0.234	0.162	0.851516	NSC2	LAPTM4A
CPSF6	6.53682e-05	0.319805	0.289	0.211	0.894106	NSC2	CPSF6
CAND1	6.68233e-05	0.251198	0.226	0.155	0.914009	NSC2	CAND1
PAK3	6.74712e-05	0.259597	0.184	0.12	0.922871	NSC2	PAK3
LRFN5	6.84451e-05	0.288215	0.239	0.166	0.936193	NSC2	LRFN5
NAB1	6.97314e-05	0.282295	0.176	0.114	0.953787	NSC2	NAB1
NCOA3	7.38077e-05	0.277767	0.143	0.088	1	NSC2	NCOA3
ZNRF2	8.00296e-05	0.279596	0.152	0.096	1	NSC2	ZNRF2
MPP6	8.14683e-05	0.359466	0.436	0.37	1	NSC2	MPP6
CCDC149	8.19142e-05	0.25224	0.189	0.124	1	NSC2	CCDC149
PUS7L	8.20713e-05	0.252638	0.148	0.091	1	NSC2	PUS7L
DPY19L1	8.77964e-05	0.306394	0.254	0.181	1	NSC2	DPY19L1
SARS	8.87387e-05	0.256858	0.128	0.077	1	NSC2	SARS
PUM1	8.91943e-05	0.31286	0.49	0.432	1	NSC2	PUM1
MAPRE2	8.94449e-05	0.291873	0.395	0.318	1	NSC2	MAPRE2
MIOS	9.46662e-05	0.255698	0.128	0.077	1	NSC2	MIOS
GDI2	9.66241e-05	0.288058	0.278	0.205	1	NSC2	GDI2
LHX2	0.000101049	0.274562	0.371	0.293	1	NSC2	LHX2
CYBRD1	0.000104053	0.263005	0.145	0.091	1	NSC2	CYBRD1
ORC4	0.000105154	0.273653	0.351	0.274	1	NSC2	ORC4
TMED10	0.000108235	0.311811	0.247	0.177	1	NSC2	TMED10
PDLIM5	0.00010834	0.298375	0.586	0.508	1	NSC2	PDLIM5
RAB11FIP2	0.000109662	0.324279	0.438	0.364	1	NSC2	RAB11FIP2
SERPINI1	0.0001097	0.27686	0.204	0.139	1	NSC2	SERPINI1
IPP	0.000120888	0.284411	0.15	0.096	1	NSC2	IPP
REEP1	0.000123326	0.252301	0.117	0.069	1	NSC2	REEP1
LUC7L3	0.000126409	0.282889	0.579	0.511	1	NSC2	LUC7L3
DHX36	0.000128463	0.318977	0.371	0.3	1	NSC2	DHX36
WASF2	0.00013039	0.280454	0.206	0.142	1	NSC2	WASF2
CHN1	0.000131783	0.267564	0.711	0.67	1	NSC2	CHN1
PURG	0.000132297	0.30786	0.295	0.225	1	NSC2	PURG
PCMTD1	0.0001392	0.26108	0.291	0.216	1	NSC2	PCMTD1
BCL2	0.000141727	0.265645	0.334	0.252	1	NSC2	BCL2
HNRNPDL	0.000144713	0.296152	0.377	0.303	1	NSC2	HNRNPDL
SFPQ	0.000147433	0.308161	0.423	0.348	1	NSC2	SFPQ
WDR26	0.000156511	0.261328	0.219	0.154	1	NSC2	WDR26
MCC1	0.000157005	0.315882	0.705	0.664	1	NSC2	MCC
PAPOLA	0.000160447	0.309324	0.323	0.245	1	NSC2	PAPOLA
PTBP2	0.000177226	0.270483	0.566	0.504	1	NSC2	PTBP2
SLC1A1	0.000187705	0.313679	0.165	0.109	1	NSC2	SLC1A1
NXN	0.000191378	0.32021	0.176	0.117	1	NSC2	NXN
AMOT	0.000199268	0.302879	0.213	0.151	1	NSC2	AMOT
NIM1K	0.00020161	0.330626	0.189	0.13	1	NSC2	NIM1K
STK39	0.00020194	0.358443	0.332	0.266	1	NSC2	STK39
TACC2	0.000201971	0.30986	0.395	0.331	1	NSC2	TACC2
GNA13	0.000203417	0.286848	0.332	0.257	1	NSC2	GNA13
ANGEL2	0.000218989	0.253553	0.226	0.16	1	NSC2	ANGEL2
MORF4L1	0.000226684	0.270288	0.262	0.195	1	NSC2	MORF4L1
DDX5	0.000230383	0.284328	0.51	0.439	1	NSC2	DDX5
EMP2	0.000232353	0.262101	0.184	0.126	1	NSC2	EMP2
DENND4A	0.000255869	0.283712	0.395	0.321	1	NSC2	DENND4A
ENAH	0.000267885	0.288338	0.36	0.282	1	NSC2	ENAH
LHFPL3	0.000310701	0.34359	0.484	0.431	1	NSC2	LHFPL3
ANKRD10	0.000314347	0.255102	0.414	0.338	1	NSC2	ANKRD10
SACS	0.000329775	0.271846	0.291	0.221	1	NSC2	SACS
ATL1	0.000349583	0.254061	0.208	0.148	1	NSC2	ATL1
TMX3	0.000351484	0.273377	0.215	0.155	1	NSC2	TMX3
SIPA1L1	0.00035504	0.30413	0.618	0.561	1	NSC2	SIPA1L1
PSIP1	0.000373957	0.263804	0.299	0.23	1	NSC2	PSIP1
ELOVL5	0.000384426	0.25579	0.232	0.167	1	NSC2	ELOVL5
KMT2E	0.000385326	0.255848	0.505	0.437	1	NSC2	KMT2E
RAB18	0.000385929	0.275497	0.228	0.164	1	NSC2	RAB18
EPC2	0.000387412	0.254502	0.369	0.296	1	NSC2	EPC2
CDIP1	0.000394481	0.267259	0.21	0.15	1	NSC2	CDIP1
SLC38A6	0.00040172	0.264993	0.178	0.123	1	NSC2	SLC38A6
EDA	0.000414664	0.372399	0.191	0.134	1	NSC2	EDA
CCDC82	0.000425448	0.258434	0.21	0.151	1	NSC2	CCDC82
BOC	0.000523751	0.319165	0.438	0.371	1	NSC2	BOC
SDK1	0.00055791	0.251313	0.163	0.11	1	NSC2	SDK1
PTEN	0.000658153	0.250693	0.397	0.322	1	NSC2	PTEN
VPS50	0.00066045	0.284234	0.265	0.204	1	NSC2	VPS50
STIM1	0.000801963	0.271389	0.44	0.371	1	NSC2	STIM1
LDLRAD3	0.000845729	0.26768	0.26	0.2	1	NSC2	LDLRAD3
IFT88	0.00102291	0.262947	0.332	0.269	1	NSC2	IFT88
SHPRH	0.00104628	0.250127	0.388	0.324	1	NSC2	SHPRH
PHF3	0.00109849	0.264017	0.358	0.291	1	NSC2	PHF3
ARID4A	0.00120431	0.268912	0.336	0.276	1	NSC2	ARID4A
ST6GAL2	0.00127638	0.266562	0.137	0.092	1	NSC2	ST6GAL2
STAG2	0.00131177	0.258347	0.213	0.158	1	NSC2	STAG2
PTGFRN	0.00159947	0.262301	0.139	0.095	1	NSC2	PTGFRN
ITPRID2	0.00160212	0.283642	0.221	0.168	1	NSC2	ITPRID2
THTPA	0.00162032	0.265406	0.278	0.22	1	NSC2	THTPA
SLC7A11	0.00165806	0.256696	0.456	0.397	1	NSC2	SLC7A11
PRRC2B	0.00197089	0.250267	0.319	0.261	1	NSC2	PRRC2B
CLIP4	0.00214709	0.250563	0.317	0.258	1	NSC2	CLIP4
TRIM44	0.00220562	0.286147	0.408	0.357	1	NSC2	TRIM44
2021-03-01	0.00228907	0.357177	0.206	0.156	1	NSC2	2021-03-01
YAP1	0.00233565	0.30045	0.343	0.292	1	NSC2	YAP1
TENM4	0.00239103	0.258615	0.154	0.109	1	NSC2	TENM4
GABRB2	0.00274123	0.282003	0.354	0.3	1	NSC2	GABRB2
FGF13	0.00279766	0.274817	0.215	0.164	1	NSC2	FGF13
CWF19L2	0.00288598	0.288201	0.299	0.244	1	NSC2	CWF19L2
FSTL5	0.00423207	0.279193	0.345	0.29	1	NSC2	FSTL5
ARNT	0.00504473	0.260394	0.26	0.211	1	NSC2	ARNT
AGBL1	0.00545538	0.374088	0.124	0.087	1	NSC2	AGBL1
FBN1	0.00607067	0.265213	0.291	0.239	1	NSC2	FBN1
FAM89A	0.00864018	0.276354	0.15	0.112	1	NSC2	FAM89A
ASCL1	8.12138e-24	0.3876	0.091	0.018	1.11084e-19	NSC2	ASCL1
RNF150	0.00890008	0.29234	0.31	0.263	1	NSC2	RNF150
GFAP	1.66926e-189	1.42082	0.721	0.455	2.28321e-185	Astrocyte	GFAP
DPP10	1.82174e-165	1.00553	0.965	0.896	2.49178e-161	Astrocyte	DPP10
CACNA2D3	5.11032e-135	1.18266	0.747	0.565	6.9899e-131	Astrocyte	CACNA2D3
KAZN	7.60948e-127	1.24744	0.659	0.449	1.04082e-122	Astrocyte	KAZN
RNF182	2.28117e-122	1.05081	0.266	0.064	3.12019e-118	Astrocyte	RNF182
KLHL29	1.19951e-110	1.18902	0.414	0.188	1.64069e-106	Astrocyte	KLHL29
DCLK2	4.16462e-109	1.04954	0.759	0.647	5.69637e-105	Astrocyte	DCLK2
SLC38A1	1.45396e-105	1.26617	0.262	0.073	1.98873e-101	Astrocyte	SLC38A1
ITGB4	9.24226e-103	0.86908	0.724	0.564	1.26416e-98	Astrocyte	ITGB4
XIRP2	6.21433e-91	1.13646	0.19	0.038	8.49997e-87	Astrocyte	XIRP2
CPAMD8	2.70475e-89	0.906363	0.146	0.017	3.69955e-85	Astrocyte	CPAMD8
PPP2R2B	1.82168e-77	0.533698	0.932	0.884	2.49169e-73	Astrocyte	PPP2R2B
CROCC	2.20826e-76	0.990257	0.336	0.158	3.02046e-72	Astrocyte	CROCC
RERG	1.79607e-72	0.885523	0.366	0.183	2.45667e-68	Astrocyte	RERG
SEMA3B	2.00201e-72	0.855134	0.411	0.23	2.73834e-68	Astrocyte	SEMA3B
DCLK11	9.80344e-72	0.545611	0.91	0.865	1.34091e-67	Astrocyte	DCLK1
MMP28	1.34904e-68	0.784563	0.159	0.036	1.84522e-64	Astrocyte	MMP28
ST6GALNAC3	1.91997e-68	0.815793	0.57	0.415	2.62614e-64	Astrocyte	ST6GALNAC3
ID3	5.51905e-61	0.826325	0.158	0.042	7.54896e-57	Astrocyte	ID3
SLC28A1	1.03582e-60	0.924343	0.207	0.073	1.41679e-56	Astrocyte	SLC28A1
WNK2	4.72136e-58	0.735134	0.579	0.451	6.45788e-54	Astrocyte	WNK2
ALPK3	3.02221e-57	0.817053	0.493	0.342	4.13377e-53	Astrocyte	ALPK3
NAV2	4.01388e-52	0.47888	0.863	0.81	5.49018e-48	Astrocyte	NAV2
ADAMTS9	5.33716e-52	0.731708	0.225	0.094	7.30016e-48	Astrocyte	ADAMTS9
PSD3	6.90712e-51	0.538156	0.705	0.601	9.44755e-47	Astrocyte	PSD3
CDK5RAP2	1.58998e-48	0.667448	0.552	0.438	2.17478e-44	Astrocyte	CDK5RAP2
MAN1A1	6.46873e-45	0.668948	0.396	0.256	8.84793e-41	Astrocyte	MAN1A1
DAAM2	1.2339e-42	0.489358	0.807	0.756	1.68773e-38	Astrocyte	DAAM2
MYO16	5.68223e-42	0.767903	0.347	0.22	7.77216e-38	Astrocyte	MYO16
PLEKHA5	2.67859e-41	0.534581	0.745	0.679	3.66377e-37	Astrocyte	PLEKHA5
WWOX	8.06319e-41	0.445209	0.912	0.886	1.10288e-36	Astrocyte	WWOX
HSPB8	2.02447e-38	0.542817	0.111	0.032	2.76907e-34	Astrocyte	HSPB8
VCAN1	1.04946e-37	0.558976	0.408	0.274	1.43545e-33	Astrocyte	VCAN
P2RX7	1.6411e-36	0.575384	0.242	0.128	2.2447e-32	Astrocyte	P2RX7
CD38	2.77611e-34	0.676473	0.251	0.142	3.79717e-30	Astrocyte	CD38
COL9A2	3.10422e-33	0.617888	0.279	0.17	4.24595e-29	Astrocyte	COL9A2
PRKAG2	7.53576e-33	0.807783	0.462	0.366	1.03074e-28	Astrocyte	PRKAG2
CNTNAP2	3.19015e-31	0.33675	0.818	0.747	4.36349e-27	Astrocyte	CNTNAP2
RGS6	3.40495e-31	0.707475	0.336	0.229	4.65729e-27	Astrocyte	RGS6
KCNIP4	5.51144e-31	0.301018	0.928	0.883	7.53855e-27	Astrocyte	KCNIP4
PHYHD1	1.01187e-30	0.627743	0.338	0.231	1.38403e-26	Astrocyte	PHYHD1
SNED1	1.06683e-29	0.56615	0.324	0.217	1.4592e-25	Astrocyte	SNED1
NFASC	3.08386e-28	0.530992	0.272	0.172	4.21811e-24	Astrocyte	NFASC
IGFBP5	3.30243e-28	0.550199	0.161	0.077	4.51706e-24	Astrocyte	IGFBP5
NRG1	9.7276e-28	0.517866	0.622	0.558	1.33054e-23	Astrocyte	NRG1
DSCAML1	1.80141e-25	0.607056	0.325	0.228	2.46396e-21	Astrocyte	DSCAML1
C2CD2	2.15457e-25	0.546628	0.19	0.106	2.94702e-21	Astrocyte	C2CD2
RAB3C	2.7134e-25	0.532464	0.212	0.124	3.71139e-21	Astrocyte	RAB3C
RASL12	3.10518e-25	0.478209	0.166	0.086	4.24726e-21	Astrocyte	RASL12
GRIA1	5.06113e-25	0.338958	0.755	0.699	6.92262e-21	Astrocyte	GRIA1
ABR	9.84426e-25	0.462349	0.568	0.501	1.3465e-20	Astrocyte	ABR
DPYSL31	3.22915e-24	0.462674	0.139	0.065	4.41683e-20	Astrocyte	DPYSL3
CTNNA3	2.58869e-23	0.478629	0.544	0.474	3.54081e-19	Astrocyte	CTNNA3
PLEC	8.37858e-23	0.459715	0.381	0.288	1.14602e-18	Astrocyte	PLEC
KCNN3	1.07766e-22	0.507055	0.255	0.167	1.47403e-18	Astrocyte	KCNN3
PCSK61	2.38226e-22	0.522876	0.263	0.174	3.25846e-18	Astrocyte	PCSK6
NRXN3	2.68765e-22	0.328475	0.863	0.83	3.67617e-18	Astrocyte	NRXN3
RELN	5.79191e-22	0.506062	0.221	0.139	7.92218e-18	Astrocyte	RELN
ID2	1.05325e-21	0.541951	0.226	0.144	1.44063e-17	Astrocyte	ID2
STAC2	1.37255e-21	0.413372	0.131	0.064	1.87737e-17	Astrocyte	STAC2
AGBL4	6.08242e-21	0.363851	0.613	0.541	8.31953e-17	Astrocyte	AGBL4
DPP6	6.89445e-21	0.425163	0.635	0.589	9.43022e-17	Astrocyte	DPP6
MYRIP	1.31818e-20	0.471238	0.445	0.365	1.803e-16	Astrocyte	MYRIP
OSGIN2	1.71513e-20	0.464374	0.22	0.141	2.34595e-16	Astrocyte	OSGIN2
ALPK1	2.40111e-20	0.435583	0.137	0.07	3.28424e-16	Astrocyte	ALPK1
COBLL1	3.13455e-20	0.423101	0.153	0.082	4.28743e-16	Astrocyte	COBLL1
FRAS11	4.99296e-20	0.380392	0.33	0.233	6.82937e-16	Astrocyte	FRAS1
CNTN1	5.90666e-20	0.305701	0.812	0.792	8.07913e-16	Astrocyte	CNTN1
SLC14A1	6.86059e-20	0.494687	0.204	0.129	9.38392e-16	Astrocyte	SLC14A1
KIAA1217	7.11097e-20	0.539863	0.193	0.118	9.72638e-16	Astrocyte	KIAA1217
B3GLCT	3.95094e-19	0.395601	0.112	0.054	5.40409e-15	Astrocyte	B3GLCT
FAM155A	4.05672e-19	0.404425	0.56	0.468	5.54878e-15	Astrocyte	FAM155A
GSN	8.20129e-19	0.463124	0.318	0.236	1.12177e-14	Astrocyte	GSN
MCF2L2	1.9986e-18	0.433726	0.729	0.704	2.73368e-14	Astrocyte	MCF2L2
BICD11	2.81825e-18	0.336811	0.686	0.655	3.8548e-14	Astrocyte	BICD1
ADD3	4.29644e-18	0.341839	0.761	0.743	5.87667e-14	Astrocyte	ADD3
ZFP36L11	1.13105e-17	0.452724	0.382	0.309	1.54705e-13	Astrocyte	ZFP36L1
NKAIN2	1.30944e-17	0.305142	0.733	0.701	1.79105e-13	Astrocyte	NKAIN2
RGS9	4.04081e-17	0.407747	0.287	0.211	5.52702e-13	Astrocyte	RGS9
SLC16A9	4.34278e-17	0.362144	0.123	0.065	5.94006e-13	Astrocyte	SLC16A9
SEMA5A	6.53204e-17	0.459602	0.364	0.286	8.93453e-13	Astrocyte	SEMA5A
CABCOCO1	1.57394e-16	0.395625	0.2	0.13	2.15283e-12	Astrocyte	CABCOCO1
AQP4	1.83176e-16	0.433328	0.592	0.548	2.50548e-12	Astrocyte	AQP4
COL4A5	1.42271e-15	0.391161	0.318	0.242	1.94598e-11	Astrocyte	COL4A5
CALD11	3.28524e-15	0.390361	0.302	0.23	4.49355e-11	Astrocyte	CALD1
SYNDIG1	3.55692e-15	0.419089	0.147	0.089	4.86516e-11	Astrocyte	SYNDIG1
CXXC5	4.50243e-15	0.370901	0.147	0.088	6.15843e-11	Astrocyte	CXXC5
IL17RB	6.25908e-15	0.466058	0.221	0.155	8.56116e-11	Astrocyte	IL17RB
TMEM231	6.52058e-15	0.400931	0.173	0.111	8.91885e-11	Astrocyte	TMEM231
KCNN2	9.64196e-15	0.490476	0.245	0.18	1.31883e-10	Astrocyte	KCNN2
SNTB11	1.2645e-14	0.357835	0.458	0.389	1.72958e-10	Astrocyte	SNTB1
ANGPT1	1.92363e-14	0.388716	0.633	0.608	2.63114e-10	Astrocyte	ANGPT1
CACNA1E	2.46462e-14	0.312163	0.478	0.415	3.37111e-10	Astrocyte	CACNA1E
SH3PXD2A	3.02708e-14	0.431114	0.196	0.136	4.14044e-10	Astrocyte	SH3PXD2A
ECE11	1.26343e-13	0.397992	0.407	0.349	1.72812e-09	Astrocyte	ECE1
ANKFN11	1.4749e-13	0.394365	0.299	0.229	2.01737e-09	Astrocyte	ANKFN1
EPS15L1	1.64551e-13	0.321999	0.523	0.471	2.25073e-09	Astrocyte	EPS15L1
OXR1	1.96342e-13	0.251156	0.665	0.618	2.68556e-09	Astrocyte	OXR1
TXNIP1	4.2343e-13	0.434716	0.325	0.263	5.79167e-09	Astrocyte	TXNIP
RHPN1	4.50616e-13	0.350433	0.171	0.113	6.16352e-09	Astrocyte	RHPN1
MAP3K5	7.25549e-13	0.347705	0.407	0.348	9.92406e-09	Astrocyte	MAP3K5
GAREM1	1.1971e-12	0.399093	0.348	0.287	1.6374e-08	Astrocyte	GAREM1
RFX4	1.32795e-12	0.300195	0.757	0.756	1.81637e-08	Astrocyte	RFX4
STRIP2	1.67491e-12	0.311991	0.112	0.064	2.29094e-08	Astrocyte	STRIP2
CDH4	2.93261e-12	0.262988	0.872	0.861	4.01122e-08	Astrocyte	CDH4
CD44	3.04622e-12	0.427373	0.13	0.081	4.16662e-08	Astrocyte	CD44
PADI2	3.16389e-12	0.401826	0.419	0.37	4.32756e-08	Astrocyte	PADI2
MAN1C1	4.30817e-12	0.416793	0.198	0.141	5.89272e-08	Astrocyte	MAN1C1
RETREG1	5.6916e-12	0.358842	0.236	0.178	7.78497e-08	Astrocyte	RETREG1
PHYHIPL	8.02873e-12	0.397287	0.452	0.406	1.09817e-07	Astrocyte	PHYHIPL
KIAA1549L	9.89227e-12	0.350063	0.355	0.297	1.35306e-07	Astrocyte	KIAA1549L
DPYSL2	1.55256e-11	0.344767	0.528	0.497	2.12359e-07	Astrocyte	DPYSL2
DAPK1	2.19508e-11	0.294671	0.743	0.741	3.00242e-07	Astrocyte	DAPK1
SRGAP1	2.64005e-11	0.343689	0.274	0.215	3.61106e-07	Astrocyte	SRGAP1
ITPR1	2.90629e-11	0.331817	0.193	0.138	3.97522e-07	Astrocyte	ITPR1
TNFSF4	3.88281e-11	0.265451	0.608	0.57	5.3109e-07	Astrocyte	TNFSF4
CLIC4	3.98642e-11	0.344852	0.196	0.141	5.45262e-07	Astrocyte	CLIC4
KCNT2	4.63584e-11	0.306737	0.424	0.368	6.3409e-07	Astrocyte	KCNT2
ADCY1	4.66205e-11	0.326346	0.15	0.1	6.37675e-07	Astrocyte	ADCY1
AHNAK1	6.54622e-11	0.325113	0.199	0.144	8.95392e-07	Astrocyte	AHNAK
RASGRP1	9.02725e-11	0.343345	0.188	0.135	1.23475e-06	Astrocyte	RASGRP1
ABCC8	9.23689e-11	0.275931	0.101	0.06	1.26342e-06	Astrocyte	ABCC8
ADCY8	1.0476e-10	0.349049	0.369	0.313	1.43291e-06	Astrocyte	ADCY8
CD109	1.54833e-10	0.319014	0.135	0.088	2.1178e-06	Astrocyte	CD109
ST6GAL1	1.93816e-10	0.318199	0.105	0.064	2.65101e-06	Astrocyte	ST6GAL1
SDCCAG8	3.6463e-10	0.293353	0.632	0.618	4.98741e-06	Astrocyte	SDCCAG8
MEGF9	4.4802e-10	0.37022	0.321	0.268	6.12801e-06	Astrocyte	MEGF9
PPP1R9A	4.85508e-10	0.252369	0.507	0.462	6.64078e-06	Astrocyte	PPP1R9A
GRAMD2B	8.21546e-10	0.262908	0.706	0.708	1.12371e-05	Astrocyte	GRAMD2B
STK33	3.71971e-09	0.360965	0.218	0.168	5.08782e-05	Astrocyte	STK33
SORD	4.16968e-09	0.31077	0.139	0.095	5.70328e-05	Astrocyte	SORD
AKAP61	4.36092e-09	0.273529	0.543	0.519	5.96486e-05	Astrocyte	AKAP6
SRPX1	4.64794e-09	0.288871	0.15	0.105	6.35746e-05	Astrocyte	SRPX
PCDHB4	5.01684e-09	0.315902	0.106	0.068	6.86203e-05	Astrocyte	PCDHB4
GAB2	5.34526e-09	0.316196	0.416	0.372	7.31125e-05	Astrocyte	GAB2
SLC24A2	6.85835e-09	0.28255	0.406	0.36	9.38086e-05	Astrocyte	SLC24A2
RIPK2	1.2281e-08	0.287953	0.161	0.117	0.000167979	Astrocyte	RIPK2
ADCY2	1.99511e-08	0.29558	0.625	0.623	0.000272892	Astrocyte	ADCY2
SLIT1	2.02549e-08	0.30113	0.231	0.183	0.000277046	Astrocyte	SLIT1
NRG2	2.31081e-08	0.251884	0.342	0.29	0.000316073	Astrocyte	NRG2
SLC39A11	2.59395e-08	0.412219	0.455	0.424	0.0003548	Astrocyte	SLC39A11
PITPNM2	3.31222e-08	0.31021	0.271	0.224	0.000453046	Astrocyte	PITPNM2
SPOCK3	3.44009e-08	0.280397	0.415	0.373	0.000470536	Astrocyte	SPOCK3
SUSD4	4.58922e-08	0.279378	0.264	0.216	0.000627714	Astrocyte	SUSD4
COLGALT2	6.27484e-08	0.26633	0.165	0.123	0.000858272	Astrocyte	COLGALT2
KREMEN1	6.60418e-08	0.314733	0.244	0.199	0.000903319	Astrocyte	KREMEN1
CPNE2	8.70438e-08	0.334324	0.197	0.156	0.00119059	Astrocyte	CPNE2
FBXL2	9.78623e-08	0.289579	0.119	0.082	0.00133856	Astrocyte	FBXL2
LRRC4C	1.21277e-07	0.271218	0.298	0.247	0.00165883	Astrocyte	LRRC4C
NETO2	1.38437e-07	0.291723	0.296	0.253	0.00189354	Astrocyte	NETO2
LPCAT4	1.43872e-07	0.311603	0.221	0.177	0.00196788	Astrocyte	LPCAT4
AMPH	1.65878e-07	0.289315	0.23	0.188	0.00226889	Astrocyte	AMPH
KCTD15	1.81079e-07	0.260192	0.229	0.185	0.00247679	Astrocyte	KCTD15
ZSWIM5	1.8592e-07	0.269836	0.442	0.409	0.00254302	Astrocyte	ZSWIM5
MYO18A	2.05365e-07	0.289837	0.311	0.271	0.00280898	Astrocyte	MYO18A
SOX61	2.28912e-07	0.250151	0.527	0.51	0.00313106	Astrocyte	SOX6
PLXNA4	2.79237e-07	0.271095	0.395	0.362	0.0038194	Astrocyte	PLXNA4
ITGA6	3.2296e-07	0.269965	0.404	0.372	0.00441745	Astrocyte	ITGA6
CSMD2	1.45745e-06	0.268515	0.365	0.332	0.0199349	Astrocyte	CSMD2
SLC24A4	1.72676e-06	0.290096	0.118	0.086	0.0236186	Astrocyte	SLC24A4
EFTUD2	1.79419e-06	0.402807	0.201	0.165	0.0245409	Astrocyte	EFTUD2
ANKRD6	2.29946e-06	0.269747	0.138	0.104	0.031452	Astrocyte	ANKRD6
DOCK10	3.0984e-06	0.255594	0.33	0.292	0.0423799	Astrocyte	DOCK10
ECT2L	3.24067e-06	0.271367	0.156	0.12	0.0443259	Astrocyte	ECT2L
PDE8A	4.122e-06	0.286799	0.355	0.321	0.0563807	Astrocyte	PDE8A
PLEKHH1	4.74065e-06	0.278734	0.225	0.189	0.0648426	Astrocyte	PLEKHH1
RNF1501	5.14875e-06	0.250428	0.287	0.249	0.0704246	Astrocyte	RNF150
MYLK	5.24442e-06	0.272049	0.233	0.196	0.0717332	Astrocyte	MYLK
EPB41L4A1	6.9407e-06	0.287741	0.144	0.112	0.0949348	Astrocyte	EPB41L4A
ADRA1A	7.67487e-06	0.300057	0.301	0.267	0.104977	Astrocyte	ADRA1A
TNR	8.81022e-06	0.273983	0.199	0.164	0.120506	Astrocyte	TNR
ELMO1	1.01098e-05	0.265627	0.27	0.235	0.138281	Astrocyte	ELMO1
IQCA1	1.02502e-05	0.2573	0.317	0.283	0.140202	Astrocyte	IQCA1
CADPS2	1.14013e-05	0.250647	0.283	0.247	0.155948	Astrocyte	CADPS2
LCMT1	1.59152e-05	0.251422	0.367	0.336	0.217689	Astrocyte	LCMT1
FRY	1.80829e-05	0.253006	0.296	0.265	0.247338	Astrocyte	FRY
SMOX	2.19356e-05	0.277885	0.158	0.128	0.300035	Astrocyte	SMOX
TSSC4	3.03145e-05	0.258039	0.123	0.095	0.414642	Astrocyte	TSSC4
SERINC5	3.85141e-05	0.285369	0.204	0.173	0.526795	Astrocyte	SERINC5
GRIK4	5.82256e-05	0.25707	0.264	0.231	0.79641	Astrocyte	GRIK4
PDZRN3	6.85123e-05	0.27093	0.305	0.273	0.937112	Astrocyte	PDZRN3
MAOB	0.000124499	0.3057	0.384	0.37	1	Astrocyte	MAOB
S100B1	0.000392063	0.286082	0.293	0.27	1	Astrocyte	S100B
MBP	0.000402322	0.279744	0.281	0.259	1	Astrocyte	MBP
