# Supplementary material for: Transcriptome dynamics of hippocampal neurogenesis in macaques across the lifespan and aged humans
Source: Research Square preprint supplement (doi:10.21203/rs.3.rs-1015150/v1), 2021-11-18
Supplement: Supplementary file 10 [file 9177cd3ffd18b532bd2be11e.xlsx]

## Sheet: Table S3
Supplementary Table3: Differentially expressed genes between Astrocyte from DG and CA
p_val	avg_log2FC	pct.1	pct.2	p_val_adj	cluster	gene
0	1.98882	0.943	0.576	0	DG	PPFIA2
4.06087e-306	1.69566	0.585	0.163	5.55446e-302	DG	CNTN5
2.45792e-71	1.42052	0.416	0.247	3.36194e-67	DG	FAM155A
3.70554e-262	1.21611	0.825	0.576	5.06843e-258	DG	LRRTM4
4.94491e-155	1.15967	0.572	0.302	6.76364e-151	DG	CDH8
4.43534e-195	1.14884	0.739	0.503	6.06665e-191	DG	ERC2
7.60403e-167	1.14196	0.542	0.237	1.04008e-162	DG	CCDC85A
1.55101e-298	1.14072	0.888	0.701	2.12147e-294	DG	CSMD3
3.62511e-157	1.13715	0.558	0.291	4.95842e-153	DG	COL25A1
1.0675e-264	1.13318	0.84	0.605	1.46013e-260	DG	ZFPM2
1.02611e-127	1.09943	0.439	0.191	1.40352e-123	DG	CDH9
3.34768e-253	1.05169	0.885	0.745	4.57895e-249	DG	GRIK2
3.39533e-120	1.03161	0.476	0.237	4.64413e-116	DG	GRM1
2.04872e-119	0.996833	0.608	0.403	2.80223e-115	DG	CLSTN2
1.75448e-135	0.996088	0.646	0.435	2.39977e-131	DG	SGCZ
1.7171e-102	0.984644	0.365	0.149	2.34866e-98	DG	CA10
9.76237e-202	0.939846	0.959	0.941	1.3353e-197	DG	CSMD1
2.51048e-96	0.934733	0.413	0.2	3.43384e-92	DG	C8orf34
5.1887e-92	0.926428	0.312	0.113	7.09711e-88	DG	UNC13C
6.57339e-191	0.920933	0.857	0.69	8.99109e-187	DG	RYR2
7.01691e-109	0.910376	0.57	0.366	9.59772e-105	DG	TMEFF2
6.19898e-84	0.893727	0.402	0.208	8.47897e-80	DG	SYNPR
3.09838e-108	0.893392	0.602	0.4	4.23796e-104	DG	DPYD
1.63967e-203	0.886939	0.904	0.778	2.24275e-199	DG	EPHA6
3.57043e-90	0.880792	0.417	0.21	4.88364e-86	DG	EPHA7
3.4725e-88	0.858738	0.402	0.192	4.74968e-84	DG	SEMA5A
7.72464e-94	0.856694	0.937	0.852	1.05658e-89	DG	DPP10
3.30176e-76	0.845966	0.505	0.334	4.51615e-72	DG	GABRB3
9.81878e-222	0.83487	0.971	0.856	1.34301e-217	DG	KCNIP4
5.43084e-84	0.821628	0.504	0.311	7.42831e-80	DG	KCNT2
5.75034e-110	0.796274	0.736	0.582	7.86531e-106	DG	KCTD16
1.81153e-58	0.795918	0.31	0.155	2.47781e-54	DG	KCNJ6
2.5327e-69	0.793897	0.282	0.112	3.46423e-65	DG	PDE7B
3.45653e-74	0.7869	0.475	0.281	4.72785e-70	DG	PCDH15
7.87009e-65	0.78538	0.434	0.267	1.07647e-60	DG	PRR16
9.82757e-83	0.775356	0.607	0.449	1.34422e-78	DG	MCTP1
3.12865e-180	0.767481	0.907	0.811	4.27936e-176	DG	NBEA
1.39965e-62	0.766766	0.282	0.124	1.91444e-58	DG	ELMOD1
1.44482e-66	0.765156	0.437	0.274	1.97623e-62	DG	TIAM1
1.81362e-67	0.755064	0.22	0.069	2.48067e-63	DG	THSD7B
8.01873e-56	0.748836	0.421	0.265	1.0968e-51	DG	UST
1.39179e-57	0.745202	0.295	0.142	1.90369e-53	DG	MAML3
2.50622e-72	0.738202	0.571	0.414	3.42801e-68	DG	GALNT17
2.28668e-61	0.734911	0.482	0.324	3.12772e-57	DG	SPOCK1
3.64685e-77	0.730992	0.623	0.488	4.98817e-73	DG	EDIL3
4.1421e-96	0.717696	0.7	0.57	5.66557e-92	DG	RFX3
2.47443e-75	0.714529	0.683	0.561	3.38453e-71	DG	DPP6
3.33998e-60	0.711354	0.274	0.119	4.56842e-56	DG	ZMAT4
1.49195e-52	0.710283	0.267	0.125	2.04069e-48	DG	ADAMTS3
1.48502e-69	0.698925	0.58	0.426	2.03121e-65	DG	KCNH1
0	1.86357	0.72	0.196	0	CA	PLP1
0	1.54894	0.714	0.201	0	CA	MEIS2
1.32091e-131	0.977468	0.453	0.177	1.80674e-127	CA	PLCB4
8.85637e-100	0.9044	0.492	0.238	1.21137e-95	CA	TRIM58
1.18991e-97	0.829567	0.936	0.846	1.62755e-93	CA	SLC24A3
1.0185e-68	0.738784	0.477	0.264	1.3931e-64	CA	MYO16
8.64335e-133	0.712461	0.926	0.776	1.18224e-128	CA	MAPK10
5.14574e-102	0.705762	0.777	0.517	7.03834e-98	CA	PEX5L
1.08266e-74	0.653106	0.312	0.122	1.48087e-70	CA	FIGN
5.60398e-88	0.645178	0.299	0.102	7.66512e-84	CA	MEIS1
2.47464e-63	0.642397	0.692	0.477	3.38482e-59	CA	KIAA0355
2.80349e-55	0.62792	0.499	0.315	3.83462e-51	CA	TMEM132C
2.27499e-73	0.598341	0.624	0.387	3.11173e-69	CA	WSB1
5.37086e-71	0.585941	0.734	0.509	7.34626e-67	CA	SLC8A1
2.09385e-69	0.58016	0.704	0.475	2.86396e-65	CA	RYR3
6.0222e-31	0.577297	0.338	0.21	8.23716e-27	CA	RGS6
5.51642e-51	0.572553	0.505	0.318	7.54535e-47	CA	BRINP3
3.91484e-91	0.571835	0.199	0.041	5.35472e-87	CA	MOG
4.17654e-69	0.570188	0.507	0.273	5.71266e-65	CA	CADPS2
7.29564e-40	0.568662	0.46	0.304	9.97898e-36	CA	WIF1
3.22442e-77	0.567771	0.364	0.154	4.41037e-73	CA	MYLK
2.3871e-61	0.566772	0.629	0.425	3.26507e-57	CA	COL5A3
1.39829e-43	0.550737	0.161	0.056	1.91259e-39	CA	CPAMD8
4.03908e-60	0.54545	0.246	0.093	5.52466e-56	CA	TOX
4.36382e-82	0.543612	0.177	0.035	5.96884e-78	CA	SPP1
1.69163e-60	0.534868	0.251	0.096	2.31381e-56	CA	NDST3
5.50423e-58	0.525622	0.433	0.234	7.52868e-54	CA	EYA1
1.76679e-70	0.524846	0.676	0.427	2.41662e-66	CA	CTNNA3
1.29306e-31	0.51157	0.79	0.674	1.76864e-27	CA	DCLK2
1.03797e-81	0.509761	0.163	0.028	1.41973e-77	CA	CNTN2
8.22853e-51	0.503216	0.362	0.188	1.1255e-46	CA	GPAM
1.39401e-41	0.49988	0.889	0.862	1.90673e-37	CA	GPC5
5.49478e-65	0.498233	0.171	0.044	7.51575e-61	CA	SATB2
2.9123e-55	0.486685	0.413	0.218	3.98344e-51	CA	MAN2A1
1.06793e-50	0.485341	0.568	0.358	1.46071e-46	CA	FOXP1
2.11288e-50	0.4708	0.307	0.144	2.88999e-46	CA	QDPR
5.62397e-58	0.470638	0.169	0.048	7.69246e-54	CA	TRPC4
8.9682e-49	0.470637	0.514	0.319	1.22667e-44	CA	NAV1
9.079e-40	0.469855	0.382	0.223	1.24182e-35	CA	KCNN2
1.52542e-52	0.463549	0.41	0.214	2.08647e-48	CA	ELMO1
3.1988e-32	0.462262	0.563	0.407	4.37532e-28	CA	LHFPL3
1.71827e-53	0.45514	0.527	0.307	2.35025e-49	CA	PIP4K2A
1.13875e-46	0.454673	0.631	0.44	1.55758e-42	CA	ARHGAP21
4.60014e-41	0.451228	0.245	0.114	6.29207e-37	CA	OLFM3
1.69725e-58	0.447811	0.207	0.069	2.3215e-54	CA	TF
1.96539e-36	0.446953	0.466	0.297	2.68826e-32	CA	ITPKB
3.07395e-42	0.446876	0.282	0.138	4.20454e-38	CA	PRKCB
