# Supplementary material for: Transcriptome dynamics of hippocampal neurogenesis in macaques across the lifespan and aged humans
Source: Research Square preprint supplement (doi:10.21203/rs.3.rs-1015150/v1), 2021-11-18
Supplement: Supplementary file 11 [file c38cd29186e9076ae2766cd8.xlsx]

## Sheet: Table S6
Supplementary Table6: Differentially expressed genes among major cell types of human hippocampus
	p_val	avg_log2FC	pct.1	pct.2	p_val_adj	cluster	gene
1	5.55513e-30	4.81963	0.85	0.118	1.57238e-25	Ependymal	CFAP299
2	4.54365e-22	4.42371	1	0.28	1.28608e-17	Ependymal	CFAP54
3	1.17256e-24	4.12638	0.95	0.203	3.31894e-20	Ependymal	CFAP43
4	7.57455e-16	4.08775	0.95	0.345	2.14398e-11	Ependymal	DNAH9
5	7.47249e-105	4.04871	0.85	0.03	2.11509e-100	Ependymal	DNAH11
6	1.02878e-27	4.00845	0.8	0.111	2.91197e-23	Ependymal	AGBL1
7	2.51869e-54	3.84695	0.85	0.061	7.12915e-50	Ependymal	SPAG17
8	6.8024e-85	3.69584	0.9	0.043	1.92542e-80	Ependymal	TTC6
9	7.09165e-56	3.6912	0.95	0.076	2.00729e-51	Ependymal	ARMC3
10	7.11365e-20	3.65633	0.85	0.195	2.01352e-15	Ependymal	DCDC1
11	6.6773e-15	3.53413	0.9	0.347	1.89001e-10	Ependymal	DNAH7
12	1.09998e-59	3.50084	0.8	0.048	3.11348e-55	Ependymal	LINC02055
13	0	3.4489	0.8	0.007	0	Ependymal	ADGB
14	1.37656e-44	3.41151	0.9	0.086	3.89636e-40	Ependymal	CFAP47
15	2.04449e-20	3.34873	0.8	0.16	5.78693e-16	Ependymal	DNAH12
16	5.82785e-23	3.33132	0.95	0.218	1.64957e-18	Ependymal	LRRIQ1
17	7.84508e-36	3.32674	1	0.136	2.22055e-31	Ependymal	LINC01088
18	2.47822e-50	3.27056	0.95	0.082	7.01461e-46	Ependymal	WDR49
19	1.37361e-30	3.19806	0.9	0.135	3.888e-26	Ependymal	VWA3A
20	3.9472e-15	3.18662	0.9	0.34	1.11726e-10	Ependymal	CFAP44
21	3.01867e-22	3.14161	0.8	0.145	8.54433e-18	Ependymal	ZBBX
22	2.42934e-39	3.13863	0.95	0.109	6.87626e-35	Ependymal	LMNTD1
23	8.17538e-203	3.11756	0.8	0.013	2.31404e-198	Ependymal	DTHD1
24	4.57458e-13	3.10272	0.95	0.575	1.29483e-08	Ependymal	HYDIN
25	1.48266e-35	3.02355	0.9	0.108	4.19668e-31	Ependymal	AL022068.1
26	7.42413e-14	3.00619	0.9	0.37	2.1014e-09	Ependymal	DNAH6
27	5.74791e-40	2.98921	0.9	0.099	1.62694e-35	Ependymal	SPATA17
28	3.61805e-12	2.97215	0.9	0.443	1.02409e-07	Ependymal	CCDC30
29	2.19448e-87	2.96128	0.85	0.037	6.21147e-83	Ependymal	TTC29
30	1.45557e-16	2.9441	0.95	0.343	4.12e-12	Ependymal	NEK11
31	1.15382e-43	2.91248	0.95	0.101	3.26588e-39	Ependymal	LRRC9
32	1.71117e-16	2.90855	0.8	0.207	4.84346e-12	Ependymal	CFAP46
33	1.12878e-58	2.90651	0.9	0.062	3.19501e-54	Ependymal	SERPINI2
34	8.47328e-16	2.8855	0.9	0.312	2.39836e-11	Ependymal	SPEF2
35	1.29216e-23	2.87494	0.85	0.152	3.65747e-19	Ependymal	TOGARAM2
36	2.77842e-18	2.84239	0.95	0.301	7.86431e-14	Ependymal	RFX2
37	3.23576e-46	2.82505	0.95	0.093	9.15883e-42	Ependymal	FRMPD2
38	7.76846e-62	2.81166	0.75	0.041	2.19886e-57	Ependymal	SPAG6
39	2.54877e-14	2.80809	0.95	0.457	7.2143e-10	Ependymal	ULK4
40	7.83852e-60	2.79553	0.8	0.048	2.21869e-55	Ependymal	TEKT1
41	4.74359e-26	2.75668	0.9	0.16	1.34267e-21	Ependymal	DNAAF1
42	7.45616e-18	2.75441	1	0.355	2.11047e-13	Ependymal	CCDC146
43	7.05874e-11	2.72806	0.95	0.525	1.99798e-06	Ependymal	TMEM232
44	2.0113e-20	2.72766	0.95	0.258	5.69299e-16	Ependymal	WDR78
45	4.83235e-08	2.72645	0.8	0.507	0.0013678	Ependymal	SPAG16
46	9.10302e-39	2.68899	0.95	0.11	2.57661e-34	Ependymal	STK33
47	1.19521e-29	2.67837	0.9	0.132	3.38304e-25	Ependymal	PCAT1
48	1.44586e-37	2.65797	0.9	0.105	4.09249e-33	Ependymal	FHAD1
49	2.33999e-11	2.65025	0.8	0.317	6.62334e-07	Ependymal	CASC15
50	4.22807e-17	2.64805	0.7	0.133	1.19676e-12	Ependymal	LINC00907
51	3.8143e-21	2.63809	1	0.241	1.07964e-16	Ependymal	GLIS3
52	1.48245e-158	2.63145	0.7	0.013	4.19606e-154	Ependymal	AC020718.1
53	6.23268e-38	2.6074	0.9	0.104	1.76416e-33	Ependymal	PPP1R42
54	1.59934e-09	2.59443	0.85	0.481	4.52694e-05	Ependymal	KIAA0825
55	3.40455e-24	2.58886	0.85	0.151	9.63659e-20	Ependymal	FANK1
56	7.6925e-96	2.57015	0.75	0.026	2.17736e-91	Ependymal	DNAH3
57	6.10474e-75	2.5594	0.8	0.038	1.72795e-70	Ependymal	CFAP73
58	9.64523e-19	2.55533	0.95	0.279	2.73008e-14	Ependymal	CASC2
59	5.14557e-25	2.52685	0.8	0.125	1.45645e-20	Ependymal	RSPH1
60	1.68829e-15	2.4984	0.9	0.304	4.7787e-11	Ependymal	EFCAB6
61	8.04267e-19	2.48953	0.75	0.148	2.27648e-14	Ependymal	NEK5
62	6.70434e-46	2.48617	0.85	0.074	1.89766e-41	Ependymal	CFAP52
63	8.03647e-37	2.48436	0.75	0.069	2.27472e-32	Ependymal	CAPS
64	1.74135e-123	2.46053	0.85	0.025	4.9289e-119	Ependymal	VWA3B
65	3.03434e-15	2.45569	1	0.42	8.58869e-11	Ependymal	PARD3B
66	7.31202e-34	2.43306	1	0.14	2.06967e-29	Ependymal	PLCH1
67	5.45613e-92	2.42318	0.65	0.02	1.54436e-87	Ependymal	CCDC60
68	2.31502e-12	2.41797	0.95	0.488	6.55267e-08	Ependymal	CEP126
69	2.6442e-155	2.39	0.85	0.02	7.48441e-151	Ependymal	TRDN
70	3.21423e-69	2.386	0.75	0.036	9.09787e-65	Ependymal	ARMC4
71	3.85615e-17	2.38414	0.95	0.279	1.09148e-12	Ependymal	ANKFN1
72	1.14018e-20	2.37509	0.9	0.212	3.22728e-16	Ependymal	FBXL13
73	5.79844e-184	2.37067	0.75	0.013	1.64125e-179	Ependymal	CFAP157
74	1.72225e-16	2.36036	0.75	0.167	4.87482e-12	Ependymal	IQCH
75	5.97523e-17	2.33473	0.8	0.198	1.69129e-12	Ependymal	KIAA2012
76	9.0305e-15	2.32581	1	0.461	2.55608e-10	Ependymal	PACRG
77	1.52946e-160	2.29888	0.85	0.019	4.32914e-156	Ependymal	MAP3K19
78	2.27969e-22	2.29852	0.85	0.165	6.45265e-18	Ependymal	PPIL6
79	1.58201e-14	2.29683	0.85	0.28	4.47789e-10	Ependymal	CFAP221
80	5.8635e-36	2.29634	0.75	0.073	1.65966e-31	Ependymal	DNAI1
81	1.89693e-39	2.28562	0.8	0.075	5.36927e-35	Ependymal	EFHC2
82	2.7141e-11	2.28247	0.9	0.447	7.68226e-07	Ependymal	CRB1
83	2.03318e-20	2.27268	0.75	0.132	5.75492e-16	Ependymal	DNAH5
84	1.0644e-12	2.26705	0.95	0.461	3.01279e-08	Ependymal	TSGA10
85	1.58227e-74	2.26433	0.5	0.014	4.47863e-70	Ependymal	AC019330.1
86	1.83066e-22	2.25201	0.9	0.195	5.18168e-18	Ependymal	FAM227A
87	1.65958e-33	2.2504	0.9	0.116	4.69745e-29	Ependymal	CCDC40
88	1.01339e-10	2.2491	0.9	0.505	2.86839e-06	Ependymal	DYNC2H1
89	2.67327e-37	2.24529	0.85	0.091	7.5667e-33	Ependymal	CCDC173
90	7.71238e-53	2.24493	0.9	0.068	2.18299e-48	Ependymal	GMPR
91	3.92737e-12	2.22943	0.8	0.286	1.11164e-07	Ependymal	CFAP70
92	0	2.21605	0.85	0.008	0	Ependymal	VWA5B1
93	6.05582e-24	2.20838	0.8	0.132	1.7141e-19	Ependymal	CASC1
94	5.49974e-45	2.1997	0.8	0.064	1.5567e-40	Ependymal	RGS22
95	1.07816e-07	2.19479	0.35	0.069	0.00305172	Ependymal	LINC01876
96	5.24291e-40	2.18604	1	0.109	1.48401e-35	Ependymal	EYA1
97	1.31838e-128	2.17669	0.8	0.021	3.73167e-124	Ependymal	COL8A1
98	4.49052e-12	2.17536	0.95	0.475	1.27104e-07	Ependymal	EFCAB2
99	0	1.29872	0.65	0.004	0	Ependymal	FOXJ1
100	5.20145e-15	2.12751	0.8	0.227	1.47227e-10	Ependymal	CFAP61
101	3.0275e-17	4.44178	0.37	0.147	8.56933e-13	Pericyte	CEMIP
102	4.18244e-96	4.28392	0.529	0.069	1.18384e-91	Pericyte	TAGLN
103	2.43042e-51	4.08809	0.655	0.2	6.87929e-47	Pericyte	LAMA2
104	0	4.07696	0.756	0.028	0	Pericyte	EBF1
105	0	3.25399	0.521	0.004	0	Pericyte	MYL9
106	5.71709e-40	3.12852	0.782	0.458	1.61822e-35	Pericyte	CALD1
107	5.97714e-55	3.12609	0.664	0.19	1.69183e-50	Pericyte	ATP1A2
108	1.28838e-216	3.11485	0.731	0.061	3.64677e-212	Pericyte	RBPMS
109	2.45843e-29	3.03747	0.513	0.19	6.95859e-25	Pericyte	ABCA9
110	3.22185e-49	3.02842	0.277	0.034	9.11944e-45	Pericyte	MYH11
111	1.02974e-57	2.9723	0.723	0.23	2.91468e-53	Pericyte	EPS8
112	2.41661e-17	2.92973	0.689	0.506	6.84023e-13	Pericyte	DLC1
113	0	2.88325	0.571	0.015	0	Pericyte	ITIH5
114	0	2.83788	0.529	0.011	0	Pericyte	AC092957.1
115	5.69994e-162	2.78293	0.706	0.075	1.61337e-157	Pericyte	COBLL1
116	1.34389e-61	2.77943	0.521	0.102	3.80388e-57	Pericyte	FLNA
117	2.75941e-82	2.76531	0.689	0.137	7.81052e-78	Pericyte	ADAMTS9-AS2
118	6.93713e-75	2.75557	0.647	0.136	1.96356e-70	Pericyte	NR2F2-AS1
119	3.27285e-65	2.72602	0.681	0.178	9.26381e-61	Pericyte	TIMP3
120	1.31863e-178	2.71741	0.672	0.06	3.73238e-174	Pericyte	IGFBP7
121	1.58148e-33	2.69596	0.807	0.544	4.47637e-29	Pericyte	LPP
122	1.10091e-53	2.68628	0.664	0.199	3.11614e-49	Pericyte	PLCB4
123	3.36892e-37	2.62761	0.714	0.323	9.53573e-33	Pericyte	ZFHX3
124	6.55026e-26	2.60063	0.429	0.136	1.85405e-21	Pericyte	LINC01088
125	3.44169e-122	2.57422	0.496	0.047	9.74171e-118	Pericyte	PDGFRB
126	7.03123e-64	2.57174	0.521	0.098	1.99019e-59	Pericyte	RNF152
127	1.21381e-25	2.56343	0.563	0.258	3.43568e-21	Pericyte	COL4A2
128	2.41535e-21	2.53742	0.286	0.071	6.83665e-17	Pericyte	ADAMTS9
129	1.5916e-91	2.53093	0.613	0.1	4.50501e-87	Pericyte	SVIL
130	5.50914e-132	2.5024	0.395	0.027	1.55936e-127	Pericyte	ACTA2
131	1.70356e-23	2.49552	0.504	0.2	4.82194e-19	Pericyte	PDE7B
132	8.16579e-59	2.48917	0.706	0.204	2.31133e-54	Pericyte	UTRN
133	2.37539e-21	2.4607	0.513	0.223	6.72354e-17	Pericyte	PDE3A
134	0	2.44109	0.513	0.002	0	Pericyte	CARMN
135	4.5983e-37	2.42498	0.412	0.096	1.30155e-32	Pericyte	C11orf96
136	2.44298e-118	2.40026	0.479	0.044	6.91485e-114	Pericyte	VIM
137	9.93434e-249	2.38336	0.521	0.025	2.81191e-244	Pericyte	DCN
138	3.4362e-113	2.3796	0.429	0.037	9.72616e-109	Pericyte	PTH1R
139	5.61256e-75	2.36086	0.664	0.141	1.58863e-70	Pericyte	UACA
140	1.73305e-39	2.34481	0.866	0.512	4.90539e-35	Pericyte	NEAT1
141	2.07882e-112	2.33605	0.429	0.037	5.88411e-108	Pericyte	FBLN1
142	1.1242e-33	2.31789	0.513	0.169	3.18204e-29	Pericyte	COL4A1
143	6.90903e-291	2.31033	0.529	0.022	1.9556e-286	Pericyte	BGN
144	8.56489e-05	2.29901	0.403	0.337	1	Pericyte	BICC1
145	7.4718e-10	2.29756	0.471	0.327	2.11489e-05	Pericyte	USP53
146	2.97075e-29	2.28812	0.412	0.12	8.4087e-25	Pericyte	SLC38A11
147	8.47053e-37	2.28761	0.555	0.179	2.39758e-32	Pericyte	RBMS3
148	2.79057e-102	2.2649	0.496	0.056	7.89872e-98	Pericyte	ARHGAP29
149	2.06777e-120	2.2491	0.403	0.031	5.85282e-116	Pericyte	ADIRF
150	4.23702e-226	2.24272	0.546	0.031	1.19929e-221	Pericyte	NID1
151	2.18575e-22	2.23962	0.513	0.218	6.18676e-18	Pericyte	SYNPO2
152	2.04303e-20	2.2381	0.496	0.227	5.7828e-16	Pericyte	COLEC12
153	1.10976e-274	2.22474	0.429	0.015	3.14118e-270	Pericyte	NOTCH3
154	1.47736e-58	2.21225	0.672	0.187	4.18166e-54	Pericyte	TNS1
155	4.53007e-56	2.20298	0.58	0.135	1.28224e-51	Pericyte	ZIC1
156	6.64281e-16	2.18703	0.479	0.235	1.88025e-11	Pericyte	APOD
157	7.17133e-20	2.18145	0.697	0.445	2.02985e-15	Pericyte	PRKG1
158	9.97085e-77	2.17751	0.588	0.103	2.82225e-72	Pericyte	LAMA4
159	4.47408e-24	2.16554	0.294	0.07	1.26639e-19	Pericyte	CRISPLD2
160	1.4527e-21	2.16424	0.655	0.385	4.11187e-17	Pericyte	LHFPL6
161	8.19446e-39	2.14789	0.151	0.013	2.31944e-34	Pericyte	HBA2
162	1.32132e-27	2.13105	0.571	0.252	3.74e-23	Pericyte	GRK5
163	3.03975e-27	2.13003	0.58	0.271	8.60401e-23	Pericyte	ARHGAP10
164	1.87682e-30	2.12062	0.597	0.236	5.31233e-26	Pericyte	PDZRN3
165	7.64773e-163	2.10818	0.462	0.03	2.16469e-158	Pericyte	PRELP
166	8.4712e-14	2.10131	0.588	0.416	2.39777e-09	Pericyte	CRIM1
167	3.85094e-134	2.09932	0.328	0.018	1.09001e-129	Pericyte	SLC6A12
168	5.26741e-35	2.09532	0.378	0.086	1.49094e-30	Pericyte	RGS5
169	1.29385e-79	2.06364	0.412	0.047	3.66224e-75	Pericyte	EPAS1
170	3.17721e-38	2.03709	0.496	0.133	8.9931e-34	Pericyte	ARHGAP42
171	2.56016e-50	1.9984	0.563	0.144	7.24653e-46	Pericyte	SYNE2
172	5.46175e-13	1.95999	0.672	0.606	1.54595e-08	Pericyte	SLC20A2
173	3.31009e-41	1.93364	0.521	0.139	9.3692e-37	Pericyte	PLCE1
174	1.95115e-19	1.91793	0.378	0.128	5.52272e-15	Pericyte	MCAM
175	1.17158e-11	1.91459	0.504	0.306	3.31616e-07	Pericyte	GFAP
176	1.05373e-21	1.89542	0.504	0.227	2.98259e-17	Pericyte	COL18A1
177	1.54464e-41	1.89531	0.63	0.22	4.37211e-37	Pericyte	RBMS1
178	7.95718e-154	1.8747	0.387	0.022	2.25228e-149	Pericyte	NDUFA4L2
179	1.76095e-177	1.87062	0.403	0.021	4.98436e-173	Pericyte	RIPOR3
180	2.67435e-42	1.86118	0.454	0.106	7.56975e-38	Pericyte	MYO1B
181	8.53862e-15	1.85784	0.345	0.141	2.41686e-10	Pericyte	SLC30A10
182	3.47131e-30	1.85312	0.445	0.13	9.82554e-26	Pericyte	HSPB1
183	6.78752e-49	1.84724	0.387	0.067	1.92121e-44	Pericyte	CDH6
184	3.49403e-17	1.83458	0.765	0.666	9.88984e-13	Pericyte	RORA
185	4.39315e-65	1.81046	0.244	0.02	1.24348e-60	Pericyte	LMOD1
186	1.92617e-07	1.80975	0.261	0.127	0.00545203	Pericyte	THSD4
187	5.09408e-54	1.80718	0.403	0.065	1.44188e-49	Pericyte	SNTB1
188	3.46941e-11	1.80453	0.597	0.486	9.82017e-07	Pericyte	ZEB1
189	0	1.79815	0.504	0.001	0	Pericyte	TBX18
190	4.59684e-186	1.78943	0.504	0.031	1.30113e-181	Pericyte	KANK2
191	3.70441e-09	1.78218	0.454	0.317	0.000104853	Pericyte	CASC15
192	3.7754e-71	1.77811	0.235	0.017	1.06863e-66	Pericyte	LINC02147
193	3.90699e-15	1.77195	0.479	0.227	1.10587e-10	Pericyte	PDLIM5
194	0	1.76529	0.403	0.008	0	Pericyte	CFH
195	4.91828e-178	1.76426	0.311	0.012	1.39212e-173	Pericyte	ADGRD1
196	3.12305e-22	1.75966	0.353	0.105	8.83978e-18	Pericyte	S100A6
197	0	1.75525	0.42	0.002	0	Pericyte	COL1A2
198	2.21493e-86	1.7499	0.303	0.024	6.26937e-82	Pericyte	AC012409.2
199	5.44739e-44	1.74086	0.319	0.051	1.54188e-39	Pericyte	GJC1
200	3.8186e-07	1.73308	0.336	0.202	0.0108085	Pericyte	TGFBR3
201	0	5.58463	0.936	0.015	0	Endothelial	FLT1
202	6.43156e-168	4.85234	0.879	0.153	1.82045e-163	Endothelial	ABCB1
203	0	4.66048	0.85	0.056	0	Endothelial	ATP10A
204	1.7779e-209	4.35576	0.886	0.12	5.03235e-205	Endothelial	MECOM
205	0	4.2479	0.907	0.007	0	Endothelial	CLDN5
206	0	4.23843	0.886	0.025	0	Endothelial	VWF
207	0	4.09468	0.893	0.044	0	Endothelial	EPAS1
208	2.66482e-124	4.08182	0.864	0.207	7.54278e-120	Endothelial	ELOVL7
209	1.13184e-103	4.01517	0.836	0.232	3.20367e-99	Endothelial	SLC7A5
210	1.49827e-297	3.99509	0.857	0.073	4.24085e-293	Endothelial	COBLL1
211	1.01273e-302	3.97583	0.8	0.062	2.86653e-298	Endothelial	ANO2
212	0	3.50123	0.721	0.029	0	Endothelial	ST8SIA6
213	4.09051e-248	3.32402	0.779	0.071	1.15782e-243	Endothelial	PRKCH
214	9.54236e-284	3.27297	0.736	0.054	2.70097e-279	Endothelial	CGNL1
215	0	3.25522	0.779	0.052	0	Endothelial	FLI1
216	9.70941e-154	3.1917	0.786	0.123	2.74825e-149	Endothelial	THSD4
217	6.26168e-191	3.15533	0.821	0.111	1.77237e-186	Endothelial	PODXL
218	0	3.1341	0.843	0.016	0	Endothelial	ERG
219	1.49706e-138	3.11063	0.779	0.133	4.23744e-134	Endothelial	NXN
220	1.27526e-249	3.07186	0.8	0.074	3.60963e-245	Endothelial	A2M
221	4.36551e-300	3.04235	0.836	0.066	1.23566e-295	Endothelial	HLA-E
222	7.06239e-122	3.02676	0.871	0.203	1.99901e-117	Endothelial	UTRN
223	7.36702e-67	3.02642	0.829	0.374	2.08523e-62	Endothelial	TBC1D4
224	1.23255e-77	2.99262	0.779	0.25	3.48874e-73	Endothelial	PLEKHG1
225	6.4226e-44	2.96317	0.8	0.515	1.81792e-39	Endothelial	SLC39A10
226	8.9871e-51	2.95304	0.721	0.325	2.5438e-46	Endothelial	SLC7A1
227	4.69817e-110	2.91018	0.757	0.162	1.32982e-105	Endothelial	WWTR1
228	4.83939e-51	2.89834	0.836	0.51	1.36979e-46	Endothelial	BSG
229	0	2.88886	0.8	0.027	0	Endothelial	ENG
230	1.53696e-301	2.88147	0.757	0.054	4.35036e-297	Endothelial	ARHGAP29
231	3.7118e-249	2.87832	0.707	0.056	1.05062e-244	Endothelial	RNF144B
232	0	2.86697	0.643	0.028	0	Endothelial	EBF1
233	0	2.86281	0.779	0.009	0	Endothelial	ADGRL4
234	1.64818e-78	2.83362	0.786	0.27	4.66517e-74	Endothelial	PTPRB
235	3.21641e-155	2.82222	0.836	0.142	9.10404e-151	Endothelial	SYNE2
236	1.57113e-157	2.81709	0.857	0.151	4.44707e-153	Endothelial	EGFL7
237	0	2.79569	0.629	0.018	0	Endothelial	SMAD6
238	0	2.7834	0.679	0.004	0	Endothelial	LEF1
239	0	2.75682	0.757	0.01	0	Endothelial	ABCG2
240	2.49673e-181	2.73436	0.514	0.04	7.067e-177	Endothelial	HIF1A-AS2
241	5.95975e-63	2.71809	0.836	0.414	1.68691e-58	Endothelial	CRIM1
242	0	2.71033	0.814	0.05	0	Endothelial	PECAM1
243	0	2.70991	0.779	0.004	0	Endothelial	TGM2
244	5.47647e-62	2.68035	0.914	0.617	1.55012e-57	Endothelial	PTPRG
245	0	2.67934	0.743	0.005	0	Endothelial	ADGRF5
246	8.92924e-216	2.6687	0.671	0.06	2.52742e-211	Endothelial	ITGA1
247	1.84099e-51	2.64333	0.879	0.66	5.21091e-47	Endothelial	ST6GALNAC3
248	0	2.61465	0.729	0.036	0	Endothelial	IFITM3
249	5.87954e-45	2.58451	0.807	0.519	1.6642e-40	Endothelial	PTPRM
250	5.74415e-161	2.58302	0.693	0.085	1.62588e-156	Endothelial	ITGA6
251	0	2.54815	0.664	0.028	0	Endothelial	EMCN
252	4.60508e-166	2.52318	0.75	0.102	1.30347e-161	Endothelial	SLC2A1
253	3.7804e-148	2.51557	0.679	0.091	1.07004e-143	Endothelial	CMTM8
254	1.03169e-54	2.48154	0.857	0.548	2.92021e-50	Endothelial	ESYT2
255	2.98353e-230	2.4754	0.707	0.059	8.44488e-226	Endothelial	IGFBP7
256	0	2.47407	0.55	0.006	0	Endothelial	CFH
257	6.66962e-40	2.4699	0.807	0.575	1.88783e-35	Endothelial	PPFIBP1
258	1.57742e-113	2.45683	0.714	0.128	4.4649e-109	Endothelial	MT2A
259	0	2.45589	0.579	0.014	0	Endothelial	ITIH5
260	3.52494e-26	2.45295	0.629	0.384	9.97734e-22	Endothelial	NPIPB5
261	7.3435e-81	2.41704	0.643	0.148	2.07858e-76	Endothelial	BTNL9
262	9.25531e-67	2.41171	0.943	0.683	2.61972e-62	Endothelial	TACC1
263	7.54195e-139	2.40995	0.643	0.084	2.13475e-134	Endothelial	FN1
264	1.01065e-39	2.37263	0.65	0.289	2.86066e-35	Endothelial	SLC2A3
265	5.79297e-156	2.37124	0.679	0.086	1.6397e-151	Endothelial	JCAD
266	0	2.36523	0.593	0.003	0	Endothelial	ZNF366
267	0	2.35147	0.686	0.022	0	Endothelial	EMP2
268	2.04744e-103	2.35137	0.521	0.069	5.79527e-99	Endothelial	ADAMTS9
269	5.76968e-48	2.33828	0.857	0.677	1.63311e-43	Endothelial	IGF1R
270	1.63856e-55	2.3363	0.807	0.348	4.63795e-51	Endothelial	TMSB10
271	4.24201e-122	2.32498	0.771	0.151	1.2007e-117	Endothelial	RBMS2
272	1.07323e-69	2.32441	0.607	0.137	3.03778e-65	Endothelial	ADAMTS9-AS2
273	6.99258e-45	2.31475	0.864	0.689	1.97925e-40	Endothelial	DOCK9
274	1.70458e-29	2.31289	0.807	0.599	4.8248e-25	Endothelial	ARL15
275	4.88283e-39	2.30396	0.621	0.236	1.38209e-34	Endothelial	PDZRN3
276	4.37693e-61	2.30358	0.693	0.23	1.23889e-56	Endothelial	ETS2
277	7.83594e-45	2.2993	0.864	0.723	2.21796e-40	Endothelial	CCNY
278	5.80275e-131	2.29466	0.793	0.14	1.64247e-126	Endothelial	UACA
279	1.8461e-56	2.27606	0.914	0.511	5.22538e-52	Endothelial	NEAT1
280	0	2.26744	0.586	0.017	0	Endothelial	CYYR1
281	1.96816e-41	2.26227	0.571	0.199	5.57087e-37	Endothelial	PLCB4
282	1.68787e-43	2.2578	0.779	0.384	4.77753e-39	Endothelial	LHFPL6
283	1.27757e-43	2.23884	0.814	0.518	3.61615e-39	Endothelial	MYRIP
284	5.5706e-183	2.23605	0.429	0.026	1.57676e-178	Endothelial	BMP6
285	1.13376e-102	2.22909	0.714	0.144	3.20912e-98	Endothelial	HEG1
286	1.53803e-80	2.22726	0.75	0.208	4.35339e-76	Endothelial	CPNE8
287	9.94974e-68	2.20796	0.729	0.24	2.81627e-63	Endothelial	PARVB
288	6.15904e-116	2.20327	0.636	0.099	1.74332e-111	Endothelial	SVIL
289	9.14729e-27	2.19616	0.657	0.418	2.58914e-22	Endothelial	SCARB1
290	1.51608e-65	2.19376	0.557	0.128	4.29127e-61	Endothelial	SLC16A1
291	2.19912e-208	2.19338	0.743	0.075	6.22461e-204	Endothelial	STOM
292	2.11097e-31	2.18601	0.336	0.083	5.9751e-27	Endothelial	ANGPT2
293	7.35287e-75	2.18222	0.886	0.332	2.08123e-70	Endothelial	B2M
294	4.82067e-127	2.17345	0.671	0.102	1.36449e-122	Endothelial	NEDD9
295	1.22002e-251	2.17248	0.686	0.05	3.45327e-247	Endothelial	IRAK3
296	3.57377e-40	2.15029	0.814	0.523	1.01156e-35	Endothelial	GALNT18
297	9.21347e-294	2.1446	0.65	0.039	2.60787e-289	Endothelial	DOCK6
298	2.52316e-68	2.13676	0.664	0.18	7.14179e-64	Endothelial	GALNT15
299	2.26511e-45	2.13624	0.814	0.498	6.4114e-41	Endothelial	ANKS1A
300	1.68754e-125	2.13371	0.671	0.105	4.77657e-121	Endothelial	SLC9A3R2
301	0	4.46458	0.856	0.027	0	Microglia	DOCK8
302	0	4.41153	0.848	0.186	0	Microglia	ARHGAP24
303	0	4.16275	0.853	0.243	0	Microglia	LRMDA
304	0	4.01293	0.827	0.089	0	Microglia	ARHGAP15
305	0	3.87828	0.802	0.019	0	Microglia	APBB1IP
306	0	3.67368	0.799	0.041	0	Microglia	TBXAS1
307	0	3.61625	0.809	0.019	0	Microglia	FYB1
308	0	3.58799	0.673	0.017	0	Microglia	AC074327.1
309	0	3.55133	0.912	0.67	0	Microglia	PLXDC2
310	0	3.53928	0.835	0.279	0	Microglia	ST6GAL1
311	0	3.44925	0.761	0.139	0	Microglia	RUNX1
312	0	3.38421	0.747	0.026	0	Microglia	ADAM28
313	0	3.26343	0.365	0.011	0	Microglia	AC068992.1
314	0	3.24008	0.775	0.025	0	Microglia	INPP5D
315	0	3.23923	0.786	0.254	0	Microglia	HS3ST4
316	0	3.23033	0.86	0.33	0	Microglia	ITPR2
317	0	3.22277	0.769	0.061	0	Microglia	DOCK2
318	0	3.17628	0.771	0.038	0	Microglia	SLCO2B1
319	0	3.14651	0.647	0.028	0	Microglia	P2RY12
320	0	3.14397	0.648	0.037	0	Microglia	CD74
321	0	3.13502	0.773	0.126	0	Microglia	AOAH
322	0	3.12241	0.573	0.015	0	Microglia	MSR1
323	0	3.12229	0.825	0.542	0	Microglia	SRGAP2
324	0	3.11047	0.823	0.488	0	Microglia	SFMBT2
325	0	3.04691	0.749	0.014	0	Microglia	CSF1R
326	0	3.00449	0.752	0.323	0	Microglia	SRGAP2B
327	0	2.99585	0.726	0.011	0	Microglia	PTPRC
328	0	2.97754	0.745	0.244	0	Microglia	LHFPL2
329	0	2.96174	0.866	0.332	0	Microglia	SLC1A3
330	0	2.95531	0.502	0.136	0	Microglia	APOE
331	0	2.92038	0.788	0.402	0	Microglia	BMP2K
332	0	2.91256	0.853	0.672	0	Microglia	MEF2A
333	9.20626e-303	2.89884	0.738	0.528	2.60583e-298	Microglia	SYNDIG1
334	0	2.87232	0.631	0.089	0	Microglia	FOXP2
335	0	2.82059	0.693	0.011	0	Microglia	SYK
336	0	2.77382	0.694	0.11	0	Microglia	PALD1
337	0	2.76817	0.706	0.256	0	Microglia	ATP8B4
338	0	2.74988	0.644	0.033	0	Microglia	RBM47
339	0	2.73734	0.856	0.654	0	Microglia	FOXN3
340	0	2.70098	0.589	0.065	0	Microglia	LINC02232
341	0	2.69205	0.638	0.024	0	Microglia	C3
342	0	2.68948	0.834	0.554	0	Microglia	ANKRD44
343	0	2.68215	0.627	0.031	0	Microglia	CPED1
344	0	2.6754	0.66	0.072	0	Microglia	LPCAT2
345	0	2.67169	0.679	0.014	0	Microglia	FLI1
346	0	2.65904	0.645	0.011	0	Microglia	IKZF1
347	0	2.64817	0.639	0.305	0	Microglia	AC244021.1
348	0	2.61269	0.734	0.243	0	Microglia	CSGALNACT1
349	0	2.58413	0.677	0.22	0	Microglia	ABCC4
350	0	2.57462	0.595	0.054	0	Microglia	BNC2
351	0	2.57245	0.63	0.012	0	Microglia	BLNK
352	0	2.55831	0.625	0.032	0	Microglia	LY86
353	0	2.55607	0.673	0.016	0	Microglia	RHBDF2
354	0	2.55188	0.762	0.295	0	Microglia	ZFHX3
355	0	2.53132	0.741	0.419	0	Microglia	ARHGAP22
356	0	2.52492	0.644	0.032	0	Microglia	LYN
357	0	2.52238	0.834	0.472	0	Microglia	CHST11
358	0	2.51156	0.609	0.158	0	Microglia	IPCEF1
359	0	2.49802	0.845	0.507	0	Microglia	MEF2C
360	0	2.48519	0.724	0.291	0	Microglia	ETV6
361	0	2.47878	0.391	0.017	0	Microglia	C1QB
362	0	2.4763	0.682	0.302	0	Microglia	CCND3
363	0	2.46906	0.571	0.089	0	Microglia	MERTK
364	8.70639e-94	2.46726	0.643	0.635	2.46434e-89	Microglia	GRID2
365	0	2.43812	0.709	0.281	0	Microglia	DISC1
366	0	2.41551	0.824	0.558	0	Microglia	FKBP5
367	0	2.40083	0.546	0.157	0	Microglia	RASGEF1C
368	0	2.39971	0.832	0.646	0	Microglia	EPB41L2
369	0	2.3875	0.834	0.68	0	Microglia	LDLRAD4
370	0	2.38547	0.757	0.424	0	Microglia	MAML3
371	0	2.38085	0.815	0.601	0	Microglia	SLC9A9
372	0	2.37786	0.817	0.643	0	Microglia	SORL1
373	0	2.3742	0.596	0.007	0	Microglia	PIK3R5
374	0	2.37222	0.621	0.268	0	Microglia	FMN1
375	0	2.36795	0.624	0.028	0	Microglia	MYO1F
376	0	2.36107	0.712	0.379	0	Microglia	CYFIP1
377	4.37986e-133	2.35547	0.558	0.314	1.23972e-128	Microglia	SPP1
378	0	2.34999	0.616	0.023	0	Microglia	SP100
379	0	2.33703	0.738	0.346	0	Microglia	AKAP13
380	0	2.33512	0.291	0.049	0	Microglia	CCDC26
381	0	2.33257	0.579	0.023	0	Microglia	ARHGAP25
382	0	2.29553	0.6	0.093	0	Microglia	RCSD1
383	0	2.27596	0.737	0.485	0	Microglia	FGD4
384	0	2.25442	0.604	0.193	0	Microglia	LRRK1
385	0	2.2518	0.534	0.104	0	Microglia	TGFBR1
386	0	2.21688	0.602	0.074	0	Microglia	RIN3
387	0	2.21661	0.642	0.119	0	Microglia	ZFP36L1
388	0	2.21129	0.546	0.013	0	Microglia	CSF2RA
389	8.02618e-305	2.18057	0.688	0.414	2.27181e-300	Microglia	MGAT4A
390	0	2.1652	0.607	0.121	0	Microglia	ZFP36L2
391	0	2.15453	0.558	0.018	0	Microglia	ALOX5
392	0	2.14868	0.45	0.029	0	Microglia	DLEU7-AS1
393	2.60446e-281	2.13045	0.684	0.437	7.37191e-277	Microglia	SRGAP2C
394	0	2.12026	0.668	0.339	0	Microglia	SKAP2
395	0	2.1153	0.534	0.01	0	Microglia	CD86
396	0	2.11012	0.576	0.028	0	Microglia	TGFBR2
397	0	2.10073	0.567	0.038	0	Microglia	WDFY4
398	0	2.10022	0.569	0.129	0	Microglia	KCNQ1
399	0	1.96187	0.447	0.008	0	Microglia	CX3CR1
400	0	1.8319	0.287	0.007	0	Microglia	C1QC
401	0	4.55432	0.972	0.312	0	Oligodendrocyte	CTNNA3
402	0	4.45608	0.978	0.492	0	Oligodendrocyte	PLP1
403	0	4.13391	0.971	0.329	0	Oligodendrocyte	ST18
404	0	3.96254	0.97	0.418	0	Oligodendrocyte	RNF220
405	0	3.57471	0.985	0.503	0	Oligodendrocyte	PIP4K2A
406	0	3.49223	0.958	0.246	0	Oligodendrocyte	TMEM144
407	0	3.47905	0.936	0.128	0	Oligodendrocyte	MOBP
408	0	3.38398	0.96	0.532	0	Oligodendrocyte	MAN2A1
409	0	3.37899	0.989	0.673	0	Oligodendrocyte	MBP
410	0	3.36577	0.962	0.389	0	Oligodendrocyte	TMTC2
411	0	3.28776	0.981	0.703	0	Oligodendrocyte	SLC44A1
412	0	3.20325	0.944	0.268	0	Oligodendrocyte	PDE1C
413	0	3.17551	0.942	0.241	0	Oligodendrocyte	TF
414	0	3.13937	0.935	0.119	0	Oligodendrocyte	ENPP2
415	0	3.12606	0.938	0.147	0	Oligodendrocyte	C10orf90
416	0	3.10848	0.802	0.2	0	Oligodendrocyte	AC026316.5
417	0	3.04263	0.968	0.619	0	Oligodendrocyte	PHLPP1
418	0	3.03961	0.79	0.047	0	Oligodendrocyte	LINC01608
419	0	3.00981	0.955	0.317	0	Oligodendrocyte	DOCK5
420	0	3.00588	0.961	0.578	0	Oligodendrocyte	PRUNE2
421	0	2.95928	0.868	0.29	0	Oligodendrocyte	CNP
422	0	2.91845	0.928	0.241	0	Oligodendrocyte	CLMN
423	0	2.90805	0.968	0.612	0	Oligodendrocyte	FRMD5
424	0	2.90798	0.887	0.113	0	Oligodendrocyte	KCNH8
425	0	2.83649	0.894	0.088	0	Oligodendrocyte	UGT8
426	0	2.82899	0.915	0.224	0	Oligodendrocyte	CREB5
427	0	2.81367	0.853	0.115	0	Oligodendrocyte	PCSK6
428	0	2.80038	0.977	0.715	0	Oligodendrocyte	IL1RAPL1
429	0	2.78263	0.814	0.2	0	Oligodendrocyte	SCD
430	0	2.77255	0.937	0.495	0	Oligodendrocyte	TMEM165
431	0	2.76937	0.992	0.764	0	Oligodendrocyte	QKI
432	0	2.76053	0.927	0.303	0	Oligodendrocyte	PLEKHH1
433	0	2.72595	0.929	0.305	0	Oligodendrocyte	GAB1
434	0	2.72402	0.839	0.319	0	Oligodendrocyte	HDAC2-AS2
435	0	2.7129	0.848	0.363	0	Oligodendrocyte	CLDND1
436	0	2.70324	0.947	0.63	0	Oligodendrocyte	FRYL
437	0	2.69164	0.955	0.442	0	Oligodendrocyte	NCKAP5
438	0	2.68212	0.971	0.687	0	Oligodendrocyte	PDE4B
439	0	2.67276	0.954	0.417	0	Oligodendrocyte	FRMD4B
440	0	2.66632	0.967	0.696	0	Oligodendrocyte	TTLL7
441	0	2.64872	0.84	0.15	0	Oligodendrocyte	HHIP
442	0	2.63886	0.858	0.065	0	Oligodendrocyte	SLCO1A2
443	0	2.63304	0.971	0.484	0	Oligodendrocyte	ELMO1
444	0	2.61677	0.558	0.055	0	Oligodendrocyte	SLC5A11
445	0	2.59581	0.854	0.083	0	Oligodendrocyte	SHROOM4
446	0	2.5882	0.783	0.057	0	Oligodendrocyte	PIEZO2
447	0	2.57692	0.889	0.236	0	Oligodendrocyte	CNTN2
448	0	2.57095	0.896	0.275	0	Oligodendrocyte	FAM107B
449	0	2.56961	0.92	0.437	0	Oligodendrocyte	PDE8A
450	0	2.5391	0.855	0.089	0	Oligodendrocyte	MOG
451	0	2.53229	0.951	0.617	0	Oligodendrocyte	ERBIN
452	0	2.51035	0.85	0.093	0	Oligodendrocyte	LPAR1
453	0	2.50892	0.82	0.119	0	Oligodendrocyte	ANLN
454	0	2.48549	0.923	0.481	0	Oligodendrocyte	PXK
455	0	2.46546	0.86	0.08	0	Oligodendrocyte	FA2H
456	0	2.46341	0.943	0.551	0	Oligodendrocyte	ARAP2
457	0	2.45169	0.922	0.566	0	Oligodendrocyte	SLAIN1
458	0	2.42436	0.769	0.111	0	Oligodendrocyte	VRK2
459	0	2.40909	0.848	0.101	0	Oligodendrocyte	COL4A5
460	0	2.40528	0.862	0.112	0	Oligodendrocyte	BCAS1
461	0	2.401	0.98	0.715	0	Oligodendrocyte	SLC24A2
462	0	2.39658	0.593	0.137	0	Oligodendrocyte	LINC01170
463	0	2.38755	0.806	0.049	0	Oligodendrocyte	ABCA8
464	0	2.3842	0.949	0.406	0	Oligodendrocyte	ZNF536
465	0	2.37638	0.862	0.491	0	Oligodendrocyte	QDPR
466	0	2.34677	0.761	0.066	0	Oligodendrocyte	LINC00639
467	0	2.33511	0.861	0.363	0	Oligodendrocyte	LAMP2
468	0	2.32869	0.782	0.178	0	Oligodendrocyte	KIF6
469	0	2.30124	0.96	0.678	0	Oligodendrocyte	SHTN1
470	0	2.29187	0.91	0.396	0	Oligodendrocyte	GRM3
471	0	2.27415	0.885	0.444	0	Oligodendrocyte	AMER2
472	0	2.25521	0.828	0.134	0	Oligodendrocyte	CERCAM
473	0	2.25363	0.719	0.054	0	Oligodendrocyte	CNDP1
474	0	2.2521	0.652	0.077	0	Oligodendrocyte	SELENOP
475	0	2.24537	0.828	0.186	0	Oligodendrocyte	CDK18
476	0	2.23607	0.82	0.4	0	Oligodendrocyte	POLR2F
477	0	2.23031	0.965	0.804	0	Oligodendrocyte	SIK3
478	0	2.22716	0.942	0.699	0	Oligodendrocyte	2021-09-07
479	0	2.22426	0.957	0.619	0	Oligodendrocyte	PLCL1
480	0	2.21709	0.742	0.038	0	Oligodendrocyte	FOLH1
481	0	2.21625	0.882	0.146	0	Oligodendrocyte	DAAM2
482	0	2.21385	0.912	0.645	0	Oligodendrocyte	FUT8
483	0	2.18849	0.894	0.313	0	Oligodendrocyte	HIP1
484	0	2.18704	0.783	0.043	0	Oligodendrocyte	CD22
485	0	2.1843	0.961	0.618	0	Oligodendrocyte	2021-03-01
486	0	2.17705	0.778	0.236	0	Oligodendrocyte	LINC00320
487	0	2.15697	0.837	0.385	0	Oligodendrocyte	CNTNAP4
488	0	2.15389	0.963	0.675	0	Oligodendrocyte	UNC5C
489	0	2.15204	0.773	0.206	0	Oligodendrocyte	LINC00609
490	0	2.14485	0.798	0.076	0	Oligodendrocyte	MYRF
491	0	2.1413	0.805	0.155	0	Oligodendrocyte	FGFR2
492	0	2.14037	0.719	0.377	0	Oligodendrocyte	PALM2
493	0	2.12691	0.832	0.324	0	Oligodendrocyte	MIR181A1HG
494	0	2.124	0.856	0.166	0	Oligodendrocyte	RFTN2
495	0	2.11504	0.969	0.568	0	Oligodendrocyte	SPOCK3
496	0	2.0976	0.917	0.51	0	Oligodendrocyte	HIPK2
497	0	2.08478	0.681	0.058	0	Oligodendrocyte	MAG
498	0	2.08333	0.669	0.061	0	Oligodendrocyte	ERMN
499	0	2.08274	0.896	0.488	0	Oligodendrocyte	ABCA2
500	0	2.08177	0.945	0.7	0	Oligodendrocyte	DLG1
501	0	4.94435	0.993	0.238	0	OPC	LHFPL3
502	0	3.81045	0.997	0.163	0	OPC	VCAN
503	0	3.65069	0.992	0.421	0	OPC	PTPRZ1
504	0	3.55831	0.999	0.553	0	OPC	TNR
505	0	3.38631	0.988	0.16	0	OPC	SOX6
506	0	3.32205	0.986	0.139	0	OPC	SMOC1
507	0	3.3068	0.997	0.576	0	OPC	DSCAM
508	0	3.22101	0.887	0.009	0	OPC	AC004852.2
509	0	3.2	0.995	0.432	0	OPC	PCDH15
510	0	3.1734	0.988	0.224	0	OPC	LUZP2
511	0	3.04126	0.985	0.281	0	OPC	MEGF11
512	0	3.01408	0.979	0.474	0	OPC	SLC35F1
513	0	2.9988	0.973	0.148	0	OPC	TMEM132C
514	0	2.98681	0.992	0.717	0	OPC	LRRC4C
515	0	2.93641	0.986	0.54	0	OPC	PDZD2
516	0	2.7902	0.988	0.544	0	OPC	XYLT1
517	0	2.77432	0.977	0.088	0	OPC	NXPH1
518	0	2.76181	0.973	0.235	0	OPC	BRINP3
519	0	2.74304	0.987	0.474	0	OPC	MMP16
520	0	2.54399	0.952	0.142	0	OPC	COL11A1
521	0	2.5296	0.988	0.541	0	OPC	KCND2
522	0	2.50968	0.916	0.192	0	OPC	AL445250.1
523	0	2.46789	0.988	0.473	0	OPC	CHST11
524	0	2.43303	0.986	0.698	0	OPC	EPN2
525	0	2.42421	0.698	0.057	0	OPC	MIR3681HG
526	0	2.39274	0.979	0.375	0	OPC	LINC00511
527	0	2.36419	0.976	0.498	0	OPC	OPHN1
528	0	2.36095	0.968	0.18	0	OPC	GRIK1
529	0	2.34211	0.988	0.687	0	OPC	NOVA1
530	0	2.3348	0.981	0.397	0	OPC	CA10
531	0	2.31766	0.976	0.465	0	OPC	ZEB1
532	0	2.29229	0.91	0.121	0	OPC	ADAMTS17
533	0	2.2661	0.926	0.1	0	OPC	POU6F2
534	0	2.25572	0.92	0.088	0	OPC	STK32A
535	0	2.13806	0.976	0.43	0	OPC	KAT2B
536	0	2.11389	0.863	0.18	0	OPC	ALK
537	0	2.10407	0.793	0.065	0	OPC	LINC02588
538	0	2.09895	0.965	0.342	0	OPC	TMEM132D
539	0	2.06745	0.919	0.159	0	OPC	KCNIP1
540	0	2.042	0.936	0.205	0	OPC	RAB31
541	0	2.0385	0.888	0.151	0	OPC	BCAN
542	0	2.0351	0.936	0.235	0	OPC	AL589740.1
543	0	2.01854	0.914	0.295	0	OPC	PDZRN4
544	0	1.99437	0.946	0.368	0	OPC	ZNF462
545	0	1.97783	0.876	0.101	0	OPC	MYT1
546	0	1.97569	0.995	0.401	0	OPC	SOX5
547	0	1.94145	0.928	0.236	0	OPC	CCDC50
548	0	1.90943	0.941	0.289	0	OPC	PID1
549	0	1.90641	0.928	0.257	0	OPC	UST
550	0	1.89197	0.989	0.56	0	OPC	ATRNL1
551	0	1.88586	0.993	0.597	0	OPC	MDGA2
552	0	1.87065	0.898	0.141	0	OPC	TOX
553	0	1.86312	0.977	0.602	0	OPC	KIF13A
554	0	1.86214	0.967	0.555	0	OPC	ABHD2
555	0	1.84014	0.906	0.273	0	OPC	KIF26B
556	0	1.82403	0.925	0.416	0	OPC	SAMD4A
557	0	1.82278	0.979	0.569	0	OPC	CHL1
558	0	1.81134	0.911	0.307	0	OPC	LRRN1
559	3.36663e-248	1.80459	0.773	0.372	9.52924e-244	OPC	SGCZ
560	0	1.79701	0.995	0.668	0	OPC	NRCAM
561	0	1.79642	0.924	0.192	0	OPC	SORCS1
562	0	1.7942	0.96	0.569	0	OPC	ZDHHC14
563	0	1.77725	0.881	0.165	0	OPC	PLPP4
564	0	1.77209	0.989	0.619	0	OPC	GRID2
565	0	1.76685	0.825	0.021	0	OPC	COL9A1
566	0	1.76318	0.782	0.07	0	OPC	CALCRL
567	0	1.75996	0.765	0.07	0	OPC	FERMT1
568	0	1.75794	0.91	0.163	0	OPC	ATP13A4
569	0	1.74826	0.956	0.472	0	OPC	SCN1A
570	0	1.73457	0.997	0.625	0	OPC	LRRTM4
571	0	1.71989	0.906	0.224	0	OPC	SULF2
572	0	1.71431	0.984	0.698	0	OPC	NAV1
573	0	1.70673	0.824	0.077	0	OPC	CACNG4
574	0	1.68803	0.821	0.196	0	OPC	GPC6
575	0	1.66177	0.857	0.256	0	OPC	ITGA8
576	0	1.66091	0.993	0.795	0	OPC	DPP6
577	0	1.66007	0.861	0.119	0	OPC	ARHGAP31
578	0	1.65316	0.984	0.564	0	OPC	GALNT13
579	0	1.65154	0.803	0.074	0	OPC	PRRX1
580	0	1.64029	0.995	0.644	0	OPC	FGF14
581	0	1.63853	0.872	0.202	0	OPC	NTNG1
582	0	1.63829	0.995	0.66	0	OPC	OPCML
583	0	1.62925	0.842	0.188	0	OPC	SCN9A
584	0	1.62897	0.854	0.172	0	OPC	PDE7B
585	0	1.62679	0.93	0.143	0	OPC	HIF3A
586	0	1.62601	0.704	0.043	0	OPC	CRISPLD2
587	0	1.62177	0.857	0.169	0	OPC	OLIG1
588	0	1.61176	0.632	0.053	0	OPC	KLHL1
589	0	1.60664	0.925	0.281	0	OPC	DISC1
590	0	1.6066	0.991	0.652	0	OPC	RORA
591	0	1.60452	0.992	0.731	0	OPC	SCD5
592	0	1.58819	0.972	0.633	0	OPC	ASAP1
593	0	1.58486	0.956	0.499	0	OPC	LRRTM3
594	0	1.58485	0.982	0.557	0	OPC	DGKG
595	0	1.56647	0.82	0.225	0	OPC	AMZ1
596	0	1.56497	0.86	0.258	0	OPC	LRRK2
597	0	1.5614	0.837	0.308	0	OPC	IL1RAP
598	0	1.55756	0.928	0.33	0	OPC	SORCS3
599	0	1.32458	0.749	0.079	0	OPC	OLIG2
600	0	1.41898	0.709	0.014	0	OPC	PDGFRA
601	0	4.21869	0.903	0.04	0	NSC/Astrocyte	RNF219-AS1
602	0	4.18873	0.983	0.565	0	NSC/Astrocyte	DPP10
603	0	4.0389	0.924	0.319	0	NSC/Astrocyte	ADGRV1
604	0	3.78616	0.961	0.303	0	NSC/Astrocyte	GPC5
605	0	3.69204	0.98	0.357	0	NSC/Astrocyte	PITPNC1
606	0	3.63949	0.958	0.552	0	NSC/Astrocyte	SLC1A2
607	0	3.6385	0.96	0.186	0	NSC/Astrocyte	GLIS3
608	0	3.47901	0.729	0.114	0	NSC/Astrocyte	AC002429.2
609	0	3.34318	0.94	0.109	0	NSC/Astrocyte	RFX4
610	0	3.14714	0.931	0.119	0	NSC/Astrocyte	HIF3A
611	0	3.14674	0.745	0.018	0	NSC/Astrocyte	AC073941.1
612	0	3.11231	0.97	0.445	0	NSC/Astrocyte	ADCY2
613	0	3.01673	0.931	0.259	0	NSC/Astrocyte	GFAP
614	0	2.9778	0.968	0.406	0	NSC/Astrocyte	PRKG1
615	0	2.95138	0.586	0.103	0	NSC/Astrocyte	LINC01088
616	0	2.95095	0.812	0.288	0	NSC/Astrocyte	AQP4-AS1
617	0	2.93053	0.855	0.034	0	NSC/Astrocyte	RANBP3L
618	0	2.92324	0.896	0.092	0	NSC/Astrocyte	AQP4
619	0	2.88465	0.854	0.039	0	NSC/Astrocyte	FAM189A2
620	0	2.88423	0.931	0.384	0	NSC/Astrocyte	ZNRF3
621	0	2.8629	0.884	0.061	0	NSC/Astrocyte	BMPR1B
622	0	2.79612	0.917	0.136	0	NSC/Astrocyte	ATP1A2
623	0	2.7631	0.992	0.692	0	NSC/Astrocyte	CTNNA2
624	0	2.71741	0.8	0.03	0	NSC/Astrocyte	SLC14A1
625	0	2.66335	0.989	0.477	0	NSC/Astrocyte	NEAT1
626	0	2.6568	0.729	0.113	0	NSC/Astrocyte	MIR4300HG
627	0	2.64378	0.984	0.627	0	NSC/Astrocyte	SORBS1
628	0	2.64239	0.946	0.289	0	NSC/Astrocyte	RYR3
629	0	2.63128	0.984	0.642	0	NSC/Astrocyte	RORA
630	0	2.62845	0.973	0.62	0	NSC/Astrocyte	MSI2
631	0	2.61993	0.85	0.287	0	NSC/Astrocyte	SLC4A4
632	0	2.54662	0.936	0.502	0	NSC/Astrocyte	ARHGEF4
633	0	2.51715	0.988	0.738	0	NSC/Astrocyte	NPAS3
634	0	2.49474	0.896	0.225	0	NSC/Astrocyte	GRAMD2B
635	0	2.47198	0.896	0.321	0	NSC/Astrocyte	KCNN3
636	0	2.4635	0.621	0.013	0	NSC/Astrocyte	TNC
637	0	2.44451	0.993	0.697	0	NSC/Astrocyte	DTNA
638	0	2.42733	0.977	0.594	0	NSC/Astrocyte	NEBL
639	0	2.41494	0.792	0.047	0	NSC/Astrocyte	AC027117.2
640	0	2.39475	0.752	0.031	0	NSC/Astrocyte	WDR49
641	0	2.38833	0.902	0.402	0	NSC/Astrocyte	SFXN5
642	0	2.37773	0.654	0.015	0	NSC/Astrocyte	ALDH1A1
643	0	2.37713	0.824	0.168	0	NSC/Astrocyte	MAPK4
644	0	2.3587	0.968	0.571	0	NSC/Astrocyte	FMN2
645	0	2.35651	0.932	0.381	0	NSC/Astrocyte	PARD3B
646	0	2.35462	0.924	0.248	0	NSC/Astrocyte	ITPKB
647	0	2.3389	0.853	0.178	0	NSC/Astrocyte	NHSL1
648	0	2.31897	0.952	0.455	0	NSC/Astrocyte	TRPM3
649	0	2.25256	0.843	0.207	0	NSC/Astrocyte	STON2
650	0	2.24815	0.776	0.103	0	NSC/Astrocyte	LINC01748
651	0	2.24728	0.823	0.076	0	NSC/Astrocyte	SLC25A18
652	0	2.22901	0.961	0.386	0	NSC/Astrocyte	SOX5
653	0	2.22716	0.991	0.835	0	NSC/Astrocyte	CTNND2
654	0	2.22452	0.739	0.023	0	NSC/Astrocyte	GLI3
655	0	2.2206	0.548	0.02	0	NSC/Astrocyte	CD44
656	0	2.21409	0.951	0.321	0	NSC/Astrocyte	SLC1A3
657	0	2.2115	0.884	0.328	0	NSC/Astrocyte	PREX2
658	0	2.19394	0.836	0.28	0	NSC/Astrocyte	LRIG1
659	0	2.17202	0.982	0.733	0	NSC/Astrocyte	NTM
660	0	2.16612	0.971	0.699	0	NSC/Astrocyte	NTRK2
661	0	2.1521	0.782	0.023	0	NSC/Astrocyte	PRDM16
662	0	2.1467	0.951	0.568	0	NSC/Astrocyte	DCLK2
663	0	2.14636	0.768	0.045	0	NSC/Astrocyte	LINC00299
664	0	2.14257	0.989	0.701	0	NSC/Astrocyte	GPM6A
665	0	2.12881	0.744	0.075	0	NSC/Astrocyte	PAMR1
666	0	2.10432	0.963	0.521	0	NSC/Astrocyte	CDH20
667	0	2.09542	0.823	0.181	0	NSC/Astrocyte	ADGRA3
668	0	2.09293	0.813	0.148	0	NSC/Astrocyte	ATP13A4
669	0	2.08779	0.751	0.042	0	NSC/Astrocyte	GJA1
670	0	2.08193	0.839	0.342	0	NSC/Astrocyte	CARMIL1
671	0	2.08176	0.87	0.424	0	NSC/Astrocyte	GPR75-ASB3
672	0	2.07803	0.849	0.265	0	NSC/Astrocyte	ACOT11
673	0	2.06038	0.737	0.201	0	NSC/Astrocyte	RGS20
674	0	2.05276	0.982	0.801	0	NSC/Astrocyte	MIR99AHG
675	0	2.04612	0.939	0.493	0	NSC/Astrocyte	ABLIM1
676	0	2.02928	0.592	0.073	0	NSC/Astrocyte	LMNTD1
677	0	2.00556	0.927	0.581	0	NSC/Astrocyte	FUT9
678	0	2.00337	0.783	0.157	0	NSC/Astrocyte	PDE7B
679	0	1.99768	0.778	0.039	0	NSC/Astrocyte	ITGB4
680	0	1.99565	0.796	0.124	0	NSC/Astrocyte	ARHGEF26
681	0	1.98835	0.905	0.464	0	NSC/Astrocyte	CAMK2G
682	0	1.98698	0.628	0.037	0	NSC/Astrocyte	AQP1
683	0	1.98358	0.963	0.677	0	NSC/Astrocyte	RPS6KA2
684	0	1.98286	0.815	0.235	0	NSC/Astrocyte	SLC7A11
685	0	1.97492	0.882	0.228	0	NSC/Astrocyte	CSGALNACT1
686	0	1.96686	0.355	0.014	0	NSC/Astrocyte	LINC00499
687	0	1.96512	0.866	0.457	0	NSC/Astrocyte	DOCK7
688	0	1.96366	0.769	0.29	0	NSC/Astrocyte	IQCA1
689	0	1.96293	0.761	0.043	0	NSC/Astrocyte	ACSBG1
690	0	1.96105	0.752	0.117	0	NSC/Astrocyte	RGMA
691	0	1.95057	0.83	0.35	0	NSC/Astrocyte	CACHD1
692	0	1.94393	0.982	0.845	0	NSC/Astrocyte	MACF1
693	0	1.94219	0.904	0.333	0	NSC/Astrocyte	MGAT4C
694	0	1.92779	0.813	0.185	0	NSC/Astrocyte	ACACB
695	0	1.89632	0.865	0.305	0	NSC/Astrocyte	FARP1
696	0	1.88597	0.669	0.144	0	NSC/Astrocyte	AC091826.2
697	0	1.88529	0.793	0.158	0	NSC/Astrocyte	NPL
698	0	1.87882	0.705	0.143	0	NSC/Astrocyte	2021-03-03
699	0	1.8773	0.806	0.319	0	NSC/Astrocyte	WWC1
700	0	1.87364	0.963	0.469	0	NSC/Astrocyte	PARD3
701	0	3.47759	0.897	0.195	0	GABAergic	ZNF385D
702	7.2138e-275	3.24062	0.668	0.426	2.04187e-270	GABAergic	ADARB2
703	0	3.22056	0.942	0.451	0	GABAergic	GRIP1
704	0	3.15876	0.789	0.164	0	GABAergic	GRIK1
705	0	3.03703	0.747	0.182	0	GABAergic	GALNTL6
706	0	2.95952	0.678	0.079	0	GABAergic	NXPH1
707	0	2.89873	0.737	0.103	0	GABAergic	FSTL5
708	0	2.80253	0.922	0.516	0	GABAergic	ERBB4
709	0	2.55149	0.851	0.032	0	GABAergic	GAD2
710	0	2.43752	0.602	0.166	0	GABAergic	CNR1
711	0	2.34809	0.926	0.384	0	GABAergic	KCNC2
712	7.47693e-246	2.34035	0.388	0.119	2.11635e-241	GABAergic	RELN
713	0	2.31281	0.873	0.442	0	GABAergic	UNC5D
714	0	2.28167	0.8	0.013	0	GABAergic	DLX6-AS1
715	0	2.21759	0.699	0.362	0	GABAergic	SGCZ
716	0	2.17205	0.655	0.231	0	GABAergic	PTPRT
717	0	2.16214	0.85	0.167	0	GABAergic	GAD1
718	0	2.07718	0.913	0.31	0	GABAergic	SLC6A1
719	0	1.99343	0.946	0.714	0	GABAergic	KAZN
720	0	1.99064	0.977	0.781	0	GABAergic	CNTNAP2
721	0	1.95973	0.852	0.413	0	GABAergic	MTUS2
722	1.4331e-277	1.87949	0.694	0.376	4.05638e-273	GABAergic	FGF13
723	0	1.87517	0.839	0.339	0	GABAergic	CNTN4
724	0	1.86683	0.927	0.431	0	GABAergic	XKR4
725	0	1.83856	0.356	0.034	0	GABAergic	CXCL14
726	0	1.83834	0.685	0.168	0	GABAergic	ALK
727	0	1.77241	0.836	0.312	0	GABAergic	GABRG3
728	0	1.74974	0.647	0.073	0	GABAergic	PTCHD4
729	0	1.73429	0.942	0.606	0	GABAergic	GRIK2
730	0	1.73068	0.869	0.301	0	GABAergic	KIAA1211
731	0	1.72442	0.356	0.058	0	GABAergic	IL1RAPL2
732	0	1.71526	0.778	0.157	0	GABAergic	VWC2
733	8.68845e-288	1.70365	0.639	0.251	2.45927e-283	GABAergic	CCK
734	1.16925e-301	1.69972	0.674	0.314	3.30957e-297	GABAergic	SEMA6D
735	0	1.69706	0.848	0.216	0	GABAergic	VSTM2A
736	0	1.69489	0.711	0.335	0	GABAergic	THSD7A
737	0	1.68757	0.855	0.491	0	GABAergic	PTPRM
738	0	1.68163	0.781	0.089	0	GABAergic	ARL4C
739	0	1.68047	0.898	0.548	0	GABAergic	ROBO2
740	0	1.67927	0.578	0.151	0	GABAergic	ZNF804B
741	0	1.67833	0.913	0.435	0	GABAergic	RAB3C
742	0	1.67096	0.806	0.189	0	GABAergic	PDZRN3
743	0	1.66712	0.627	0.29	0	GABAergic	MYO16
744	0	1.66681	0.731	0.338	0	GABAergic	TMEM132D
745	0	1.63537	0.706	0.038	0	GABAergic	BTBD11
746	0	1.5765	0.966	0.632	0	GABAergic	FGF14
747	0	1.54036	0.784	0.278	0	GABAergic	RPH3A
748	0	1.52264	0.705	0.207	0	GABAergic	SCG2
749	0	1.52128	0.736	0.185	0	GABAergic	KCNH7
750	0	1.51294	0.837	0.177	0	GABAergic	NHS
751	2.00457e-286	1.50386	0.859	0.493	5.67393e-282	GABAergic	CNTN5
752	4.52889e-161	1.45819	0.801	0.686	1.2819e-156	GABAergic	ROBO1
753	6.28383e-220	1.45283	0.499	0.199	1.77864e-215	GABAergic	GPC6
754	0	1.45095	0.732	0.133	0	GABAergic	RBMS3
755	0	1.44914	0.273	0.021	0	GABAergic	TAC1
756	0	1.44356	0.808	0.215	0	GABAergic	ELAVL2
757	0	1.43691	0.954	0.554	0	GABAergic	FGF12
758	0	1.42281	0.566	0.134	0	GABAergic	PLCXD3
759	0	1.41978	0.671	0.224	0	GABAergic	PLD5
760	0	1.39757	0.892	0.539	0	GABAergic	DNER
761	0	1.38977	0.453	0.126	0	GABAergic	PCDH11X
762	3.43289e-234	1.38921	0.887	0.629	9.71679e-230	GABAergic	GRIA4
763	0	1.38893	0.636	0.224	0	GABAergic	LUZP2
764	7.16517e-296	1.38594	0.553	0.209	2.0281e-291	GABAergic	FRAS1
765	0	1.37741	0.925	0.508	0	GABAergic	RIMS2
766	0	1.37626	0.904	0.496	0	GABAergic	THRB
767	0	1.37588	0.88	0.462	0	GABAergic	SETBP1
768	0	1.3725	0.724	0.145	0	GABAergic	KCNIP1
769	7.76736e-263	1.34418	0.732	0.394	2.19855e-258	GABAergic	RGS12
770	0	1.34332	0.936	0.473	0	GABAergic	GABRB2
771	0	1.33411	0.855	0.496	0	GABAergic	TENM3
772	7.30389e-200	1.3302	0.671	0.367	2.06737e-195	GABAergic	KIAA1217
773	0	1.32847	0.728	0.04	0	GABAergic	ANK1
774	0	1.31018	0.929	0.677	0	GABAergic	GNAS
775	0	1.30939	0.872	0.388	0	GABAergic	SNRPN
776	9.89526e-139	1.30195	0.439	0.205	2.80085e-134	GABAergic	SORCS1
777	0	1.30158	0.986	0.818	0	GABAergic	NRXN3
778	0	1.29139	0.793	0.28	0	GABAergic	PIP5K1B
779	0	1.28979	0.494	0.15	0	GABAergic	PCDH11Y
780	0	1.27373	0.693	0.065	0	GABAergic	IGF1
781	0	1.27014	0.93	0.52	0	GABAergic	SLC2A13
782	0	1.26199	0.715	0.313	0	GABAergic	CHRM3
783	0	1.25041	0.872	0.479	0	GABAergic	PAM
784	0	1.24335	0.598	0.179	0	GABAergic	GRIN3A
785	7.43014e-207	1.21884	0.851	0.523	2.1031e-202	GABAergic	INPP4B
786	0	1.21567	0.793	0.216	0	GABAergic	UBASH3B
787	4.29009e-180	1.21131	0.748	0.464	1.21431e-175	GABAergic	SYNPR
788	0	1.20833	0.811	0.388	0	GABAergic	SLC44A5
789	0	1.20631	0.739	0.139	0	GABAergic	PWRN1
790	6.1577e-97	1.18755	0.409	0.216	1.74294e-92	GABAergic	NTNG1
791	8.43888e-56	1.18491	0.36	0.225	2.38862e-51	GABAergic	THSD7B
792	8.59462e-135	1.184	0.51	0.25	2.43271e-130	GABAergic	PRELID2
793	0	1.18235	0.472	0.111	0	GABAergic	ADAMTS9-AS2
794	2.17003e-288	1.17156	0.217	0.031	6.14227e-284	GABAergic	SST
795	2.23948e-227	1.16712	0.734	0.411	6.33886e-223	GABAergic	ASIC2
796	8.60462e-292	1.16215	0.931	0.636	2.43554e-287	GABAergic	MACROD2
797	1.63128e-179	1.14834	0.367	0.132	4.61735e-175	GABAergic	LINC01470
798	7.63007e-224	1.13107	0.683	0.347	2.15969e-219	GABAergic	MGAT4C
799	0	1.11543	0.784	0.295	0	GABAergic	NAP1L3
800	0	1.11228	0.808	0.361	0	GABAergic	GABRA1
801	6.5878e-170	2.26574	0.982	0.52	1.86468e-165	NN	THY1
802	4.41852e-192	2.22099	0.99	0.518	1.25066e-187	NN	ENC1
803	4.15772e-181	2.21883	0.977	0.498	1.17684e-176	NN	CREG2
804	6.87635e-218	2.15662	0.943	0.365	1.94635e-213	NN	CHGB
805	2.71773e-166	2.07843	0.924	0.422	7.69254e-162	NN	YWHAH
806	2.44124e-158	2.06223	0.997	0.733	6.90993e-154	NN	CALM1
807	1.96206e-168	2.0517	0.992	0.604	5.55362e-164	NN	NPTXR
808	9.35404e-187	2.04851	0.93	0.389	2.64766e-182	NN	BEX3
809	1.63202e-188	2.02126	0.935	0.353	4.61943e-184	NN	C9orf16
810	1.46026e-137	2.0128	0.969	0.568	4.13327e-133	NN	YWHAB
811	2.67311e-163	2.01102	0.971	0.496	7.56623e-159	NN	CALM3
812	1.15094e-211	2.00277	0.95	0.32	3.25772e-207	NN	HPCA
813	2.3439e-198	1.91949	0.914	0.342	6.63441e-194	NN	BEX1
814	8.34517e-148	1.86631	0.99	0.636	2.3621e-143	NN	IDS
815	2.26444e-148	1.85236	0.997	0.826	6.40951e-144	NN	MAP1B
816	2.33589e-201	1.83805	0.958	0.386	6.61173e-197	NN	TSPAN7
817	4.71456e-128	1.83619	0.966	0.571	1.33445e-123	NN	YWHAG
818	1.28535e-215	1.83569	0.984	0.365	3.63819e-211	NN	NPTX1
819	4.96856e-98	1.78205	0.721	0.275	1.40635e-93	NN	CCK
820	3.10918e-176	1.77005	0.945	0.435	8.80053e-172	NN	PCSK1N
821	1.19368e-154	1.74609	0.906	0.37	3.37872e-150	NN	NEFL
822	6.27989e-162	1.72999	0.979	0.505	1.77752e-157	NN	OLFM1
823	2.1829e-137	1.72775	0.997	0.711	6.17869e-133	NN	SNAP25
824	5.84816e-157	1.72358	0.971	0.573	1.65532e-152	NN	DKK3
825	5.98069e-151	1.71805	0.961	0.488	1.69283e-146	NN	NAPB
826	1.57782e-115	1.70998	0.791	0.309	4.46601e-111	NN	NRIP3
827	4.89387e-150	1.69267	0.935	0.39	1.38521e-145	NN	ATP6V0E2
828	8.17084e-154	1.69085	0.992	0.528	2.31276e-149	NN	SLC17A7
829	1.1406e-176	1.69081	0.979	0.446	3.22848e-172	NN	PGM2L1
830	1.30221e-150	1.68671	0.977	0.46	3.6859e-146	NN	SCN3B
831	1.17128e-140	1.68051	0.932	0.494	3.31531e-136	NN	DYNLL1
832	1.52029e-125	1.67228	0.992	0.613	4.30318e-121	NN	UCHL1
833	8.2398e-154	1.67214	0.99	0.588	2.33227e-149	NN	BASP1
834	2.3397e-204	1.66952	0.911	0.289	6.62252e-200	NN	CNIH2
835	4.54384e-180	1.66807	0.909	0.335	1.28614e-175	NN	HOPX
836	2.04747e-129	1.65321	0.971	0.523	5.79536e-125	NN	NORAD
837	3.62294e-183	1.65055	0.984	0.498	1.02547e-178	NN	NCDN
838	7.63725e-143	1.65001	0.997	0.665	2.16172e-138	NN	CHN1
839	4.74735e-236	1.63345	0.958	0.329	1.34374e-231	NN	NRN1
840	8.35168e-123	1.63309	0.966	0.588	2.36394e-118	NN	PEBP1
841	2.61046e-163	1.62478	0.992	0.597	7.3889e-159	NN	PWAR6
842	1.6667e-140	1.62367	0.995	0.645	4.7176e-136	NN	YWHAZ
843	2.71073e-171	1.6209	0.997	0.548	7.67272e-167	NN	CAMK2A
844	3.74642e-165	1.60538	0.982	0.469	1.06043e-160	NN	LY6H
845	1.2843e-124	1.60052	0.995	0.74	3.63522e-120	NN	ATP1B1
846	3.27507e-164	1.58014	0.974	0.421	9.27009e-160	NN	NRGN
847	2.12013e-156	1.55864	0.914	0.382	6.00103e-152	NN	NEFM
848	1.19995e-151	1.55187	0.924	0.466	3.39646e-147	NN	PEA15
849	9.44353e-164	1.54108	0.992	0.626	2.67299e-159	NN	CAMK2B
850	3.00502e-149	1.52795	0.916	0.361	8.50572e-145	NN	PGAM1
851	9.62834e-134	1.52471	0.984	0.681	2.7253e-129	NN	CAMK2N1
852	1.018e-140	1.52459	0.935	0.429	2.88144e-136	NN	PGRMC1
853	2.88686e-172	1.52366	0.99	0.495	8.17127e-168	NN	PHYHIP
854	3.55461e-194	1.51454	0.937	0.345	1.00613e-189	NN	BEX2
855	5.39601e-222	1.50212	0.943	0.302	1.52734e-217	NN	LY6E
856	1.18089e-121	1.50209	0.95	0.437	3.3425e-117	NN	STMN2
857	4.23454e-155	1.50132	0.911	0.343	1.19859e-150	NN	TUBB2A
859	1.24291e-109	1.48035	0.906	0.468	3.51805e-105	NN	VXN
860	3.25352e-68	1.46709	0.885	0.466	9.20908e-64	NN	LMO4
861	8.4648e-124	1.46623	0.979	0.595	2.39596e-119	NN	SARAF
862	4.22639e-101	1.46008	0.958	0.533	1.19628e-96	NN	TUBA1B
863	2.30733e-181	1.45409	0.914	0.305	6.5309e-177	NN	CCDC85B
864	3.22768e-191	1.44658	0.953	0.368	9.13596e-187	NN	HPCAL4
866	3.27686e-126	1.43786	0.922	0.4	9.27514e-122	NN	UHMK1
867	1.23054e-57	1.43256	0.971	0.79	3.48304e-53	NN	HSP90AA1
868	5.69388e-148	1.43223	0.977	0.485	1.61165e-143	NN	NSG2
869	3.64191e-157	1.42788	0.95	0.452	1.03084e-152	NN	TOMM20
870	3.77015e-137	1.42323	0.977	0.552	1.06714e-132	NN	SELENOW
871	5.20532e-110	1.42108	0.979	0.629	1.47337e-105	NN	HSP90AB1
872	3.86393e-169	1.42012	0.974	0.459	1.09368e-164	NN	CPLX2
873	4.79304e-125	1.41572	0.979	0.517	1.35667e-120	NN	CACNG8
874	1.11513e-141	1.40118	0.966	0.524	3.15639e-137	NN	TMEM59L
875	5.76305e-142	1.39843	0.99	0.689	1.63123e-137	NN	MAPK1
876	3.36893e-156	1.38966	0.911	0.347	9.53576e-152	NN	TPI1
878	1.80046e-147	1.38444	0.94	0.462	5.0962e-143	NN	SUB1
879	2.1342e-139	1.37601	0.937	0.436	6.04086e-135	NN	ATP6V1B2
880	3.48931e-194	1.37404	0.945	0.345	9.87649e-190	NN	MMD
881	3.9923e-125	1.37225	0.916	0.446	1.13002e-120	NN	UBB
882	1.25692e-153	1.36854	0.953	0.388	3.5577e-149	NN	EEF1A2
883	5.81e-153	1.36073	0.963	0.426	1.64452e-148	NN	TSPYL1
884	1.4181e-288	1.34685	0.859	0.183	4.01393e-284	NN	CD24
885	2.27288e-136	1.34342	0.961	0.445	6.43338e-132	NN	RAB6B
886	4.6905e-206	1.34334	0.937	0.318	1.32765e-201	NN	SYT13
887	7.88074e-109	1.3369	0.932	0.492	2.23064e-104	NN	TMSB4X
888	9.05538e-158	1.33646	0.969	0.416	2.56313e-153	NN	PNMA2
889	1.13243e-143	1.33484	0.937	0.417	3.20534e-139	NN	PLEKHB2
890	1.8199e-187	0.674763	0.559	0.102	5.15123e-183	NN	BHLHE22
891	2.83486e-164	1.33265	0.911	0.364	8.02406e-160	NN	BEX4
892	3.47594e-133	1.33261	0.919	0.38	9.83865e-129	NN	SCOC
893	2.9988e-138	1.332	0.932	0.476	8.4881e-134	NN	ARF1
894	1.67634e-149	1.32886	0.961	0.456	4.74487e-145	NN	GNG2
895	3.10181e-151	1.31845	0.948	0.438	8.77968e-147	NN	MTPN
896	8.91162e-117	1.31637	0.943	0.471	2.52243e-112	NN	ACTG1
897	5.09262e-121	1.31007	0.935	0.462	1.44147e-116	NN	CFL1
898	7.16109e-174	1.0009	0.755	0.205	2.02695e-169	NN	NNAT
899	2.87393e-13	0.158204	0.551	0.344	8.13466e-09	NN	SEMA3C
900	4.35099e-66	0.54691	0.838	0.423	1.23155e-61	NN	STMN1
901	3.38697e-142	0.957629	0.896	0.32	9.58682e-138	NN	NEUROD2
902	2.07654e-149	0.550634	0.608	0.144	5.87764e-145	NN	UBE2S
903	3.43939e-19	0.434875	0.53	0.345	9.73519e-15	NN	PROX1
904	0	2.51209	0.979	0.747	0	Granule cell	PPFIA2
905	0	2.50511	0.931	0.273	0	Granule cell	ADRA1A
906	0	2.34768	0.784	0.164	0	Granule cell	ALDH1A2
907	0	2.33611	0.943	0.29	0	Granule cell	ADGRL2
908	0	2.33146	0.947	0.394	0	Granule cell	SEMA5A
909	0	2.30727	0.981	0.427	0	Granule cell	ST6GALNAC5
910	0	2.27527	0.924	0.199	0	Granule cell	TLL1
911	0	2.22223	0.985	0.756	0	Granule cell	KCNIP4
912	0	2.18978	0.899	0.27	0	Granule cell	THOC3
913	0	2.16237	0.958	0.29	0	Granule cell	GRM1
914	0	2.13971	0.978	0.343	0	Granule cell	SLIT3
915	0	2.13008	0.992	0.579	0	Granule cell	PPM1E
916	0	2.07617	0.982	0.39	0	Granule cell	PLXNA4
917	0	2.03929	0.978	0.472	0	Granule cell	DGKB
918	0	2.03795	0.948	0.329	0	Granule cell	C8orf34
919	0	2.02005	0.87	0.19	0	Granule cell	LY86-AS1
920	0	2.00386	0.9	0.141	0	Granule cell	CNGB1
921	0	1.9952	0.869	0.115	0	Granule cell	SAMD3
922	0	1.95393	0.983	0.543	0	Granule cell	ERC2
923	0	1.95075	0.992	0.505	0	Granule cell	KCTD16
924	0	1.91603	0.913	0.239	0	Granule cell	UNC13C
925	0	1.91309	0.957	0.353	0	Granule cell	AC090568.2
926	0	1.89203	0.964	0.601	0	Granule cell	TIAM1
927	0	1.89096	0.926	0.234	0	Granule cell	ZMAT4
928	0	1.88615	0.946	0.365	0	Granule cell	SYN3
929	0	1.88319	0.962	0.685	0	Granule cell	RFX3
930	0	1.86766	0.902	0.246	0	Granule cell	CCDC85A
931	0	1.86225	0.945	0.349	0	Granule cell	EPHA7
932	0	1.84729	0.967	0.416	0	Granule cell	LINC01322
933	0	1.78653	0.751	0.071	0	Granule cell	TARID
934	0	1.78313	0.943	0.333	0	Granule cell	SHISA9
935	0	1.76701	0.931	0.288	0	Granule cell	BASP1-AS1
936	0	1.76369	0.969	0.603	0	Granule cell	CSMD3
937	0	1.6954	0.963	0.563	0	Granule cell	DAB1
938	0	1.68623	0.987	0.506	0	Granule cell	CNKSR2
939	0	1.6854	0.966	0.428	0	Granule cell	MCTP1
940	0	1.67352	0.965	0.493	0	Granule cell	CACNA1C
941	0	1.67291	0.803	0.055	0	Granule cell	AC097487.1
942	0	1.66962	0.874	0.192	0	Granule cell	SPON1
943	0	1.65997	0.982	0.555	0	Granule cell	ZFPM2
944	0	1.65982	0.986	0.438	0	Granule cell	SEZ6L
945	0	1.64117	0.936	0.376	0	Granule cell	TRPM3
946	0	1.62289	0.948	0.443	0	Granule cell	DIAPH2
947	0	1.61738	0.961	0.467	0	Granule cell	CDH8
948	0	1.61544	0.945	0.341	0	Granule cell	PTPRO
949	0	1.60695	0.932	0.277	0	Granule cell	KIAA1211L
950	0	1.60684	0.912	0.306	0	Granule cell	GNAL
951	0	1.60595	0.991	0.775	0	Granule cell	NBEA
952	0	1.60414	0.909	0.284	0	Granule cell	CDH9
953	0	1.58901	0.985	0.745	0	Granule cell	CSMD1
954	0	1.58117	0.482	0.107	0	Granule cell	AC138305.1
955	0	1.57724	0.979	0.661	0	Granule cell	LARGE1
956	0	1.57651	0.997	0.495	0	Granule cell	CLSTN2
957	0	1.57005	0.994	0.699	0	Granule cell	DLGAP1
958	0	1.56547	0.975	0.652	0	Granule cell	BTBD9
959	0	1.56315	0.939	0.29	0	Granule cell	CA10
960	0	1.5565	0.945	0.355	0	Granule cell	SLC35F3
961	0	1.54148	0.985	0.456	0	Granule cell	CACNA1E
962	0	1.508	0.943	0.419	0	Granule cell	CHSY3
963	0	1.50106	0.995	0.524	0	Granule cell	NELL2
964	0	1.489	0.956	0.418	0	Granule cell	DAPK1
965	0	1.48836	0.931	0.395	0	Granule cell	PARD3
966	0	1.47883	0.966	0.364	0	Granule cell	SYNPR
967	0	1.47853	0.851	0.177	0	Granule cell	AC106795.3
968	0	1.47653	0.992	0.722	0	Granule cell	LRRC7
969	0	1.46838	0.859	0.141	0	Granule cell	BDNF
970	0	1.46662	0.943	0.337	0	Granule cell	ZNF804A
971	0	1.46635	0.876	0.331	0	Granule cell	CDH13
972	0	1.46417	0.986	0.403	0	Granule cell	KCNJ6
973	0	1.46239	0.99	0.635	0	Granule cell	RYR2
974	0	1.44448	0.968	0.411	0	Granule cell	KCNJ3
975	0	1.44127	0.946	0.35	0	Granule cell	LINGO2
976	0	1.44104	0.976	0.571	0	Granule cell	KALRN
977	0	1.42456	0.903	0.238	0	Granule cell	ANO3
978	0	1.41754	0.971	0.486	0	Granule cell	GRM7
979	0	1.39944	0.982	0.689	0	Granule cell	SYNE1
980	0	1.39754	0.969	0.363	0	Granule cell	RBFOX3
981	0	1.39054	0.813	0.225	0	Granule cell	PTCHD1-AS
982	0	1.38741	0.939	0.45	0	Granule cell	INPP4B
983	0	1.38339	0.975	0.461	0	Granule cell	FAM19A2
984	0	1.37814	0.99	0.5	0	Granule cell	GABRB3
985	0	1.3692	0.961	0.558	0	Granule cell	LRRTM4
986	0	1.36367	0.989	0.534	0	Granule cell	GRIN2A
987	0	1.36304	0.96	0.397	0	Granule cell	FAM19A1
988	0	1.35605	0.987	0.559	0	Granule cell	CADPS
989	0	1.35466	0.717	0.155	0	Granule cell	CBLN2
990	0	1.35462	0.992	0.584	0	Granule cell	CAMK1D
991	0	1.34465	0.945	0.458	0	Granule cell	TMEM108
992	0	1.33306	0.96	0.498	0	Granule cell	MKL2
993	0	1.33223	0.907	0.381	0	Granule cell	CEP112
994	0	1.32762	0.988	0.563	0	Granule cell	TENM2
995	0	1.31426	0.921	0.411	0	Granule cell	UPP2
996	0	1.31389	0.88	0.225	0	Granule cell	COL26A1
997	0	1.30909	0.975	0.464	0	Granule cell	DLGAP2
998	0	1.30882	0.96	0.446	0	Granule cell	LRFN5
999	0	1.30776	0.993	0.709	0	Granule cell	FAM155A
1000	0	1.29906	0.877	0.251	0	Granule cell	JPH1
1001	0	1.29864	0.847	0.308	0	Granule cell	SPHKAP
1002	0	1.28992	0.923	0.366	0	Granule cell	KCNK1
1003	0	0.451023	0.739	0.249	0	Granule cell	PROX1
1004	0	1.15544	0.894	0.248	0	Granule cell	BCL11B
1005	0	1.28308	0.991	0.452	0	Granule cell	GALNT17
1006	0	2.52023	0.733	0.49	0	CA3	KCNQ5
1007	7.87515e-255	2.2267	0.559	0.392	2.22906e-250	CA3	CPNE4
1008	1.96993e-226	2.20688	0.704	0.656	5.57589e-222	CA3	IQCJ-SCHIP1
1009	4.45302e-256	2.1553	0.662	0.489	1.26043e-251	CA3	SHISA6
1010	0	1.85465	0.857	0.643	0	CA3	OPCML
1011	1.2679e-82	1.82537	0.523	0.481	3.5888e-78	CA3	SDK1
1012	1.03211e-149	1.72815	0.67	0.61	2.92139e-145	CA3	PTPRG
1013	1.34847e-134	1.71442	0.615	0.536	3.81685e-130	CA3	SLC24A3
1014	4.50704e-302	1.70331	0.575	0.306	1.27572e-297	CA3	CHRM3
1015	2.57003e-106	1.68129	0.395	0.283	7.27447e-102	CA3	AFF2
1016	2.00628e-138	1.668	0.516	0.37	5.67879e-134	CA3	CDH12
1017	6.95006e-169	1.60921	0.429	0.234	1.96721e-164	CA3	TRHDE
1018	2.32855e-54	1.6066	0.605	0.588	6.59097e-50	CA3	CACNA2D3
1019	0	1.56715	0.848	0.628	0	CA3	GRIA1
1020	0	1.53481	0.341	0.081	0	CA3	CFAP299
1021	1.44686e-78	1.51938	0.564	0.545	4.09533e-74	CA3	KHDRBS3
1022	1.16356e-223	1.50323	0.71	0.594	3.29345e-219	CA3	NPTXR
1023	0.000581145	1.46367	0.535	0.663	1	CA3	SIPA1L3
1024	1.57578e-134	1.44372	0.587	0.49	4.46023e-130	CA3	EPHA4
1025	8.66621e-67	1.43035	0.687	0.728	2.45297e-62	CA3	PHACTR1
1026	0	1.42844	0.429	0.112	0	CA3	TSPAN18
1027	0	1.37079	0.67	0.5	0	CA3	CACNG8
1028	2.30167e-158	1.36811	0.583	0.496	6.51488e-154	CA3	NETO1
1029	2.20159e-222	1.36448	0.704	0.554	6.2316e-218	CA3	ROBO2
1030	9.89301e-256	1.34977	0.379	0.153	2.80022e-251	CA3	CCBE1
1031	3.5759e-128	1.32671	0.835	0.79	1.01216e-123	CA3	CNTNAP2
1032	2.34896e-109	1.31646	0.532	0.479	6.64873e-105	CA3	AMPH
1033	1.81866e-124	1.31382	0.43	0.3	5.14773e-120	CA3	KCNN2
1034	9.25433e-290	1.30873	0.67	0.511	2.61944e-285	CA3	SUSD4
1035	3.51659e-49	1.2963	0.534	0.518	9.9537e-45	CA3	TMEM178B
1036	1.20177e-143	1.28127	0.524	0.349	3.40162e-139	CA3	MGAT4C
1037	1.00534e-86	1.27077	0.684	0.616	2.8456e-82	CA3	DCC
1038	3.48187e-99	1.27076	0.571	0.48	9.85543e-95	CA3	NRP1
1039	5.19857e-38	1.27016	0.591	0.581	1.47146e-33	CA3	AFF3
1040	1.10012e-51	1.25194	0.623	0.598	3.11388e-47	CA3	RIMS1
1041	0	1.24946	0.732	0.526	0	CA3	CAMK2A
1042	9.90974e-121	1.24491	0.562	0.464	2.80495e-116	CA3	SV2B
1043	1.1244e-78	1.23859	0.518	0.481	3.1826e-74	CA3	MEG8
1044	1.37068e-63	1.19879	0.556	0.488	3.87972e-59	CA3	LDB2
1045	2.19576e-75	1.18644	0.6	0.497	6.2151e-71	CA3	FAM19A1
1046	1.02039e-15	1.18301	0.684	0.794	2.8882e-11	CA3	PDE4D
1047	2.26039e-239	1.17264	0.507	0.285	6.39802e-235	CA3	NRIP3
1048	9.05741e-121	1.16673	0.485	0.31	2.5637e-116	CA3	RYR3
1049	2.33254e-145	1.1661	0.748	0.572	6.60225e-141	CA3	CLSTN2
1050	2.58375e-29	1.16545	0.437	0.452	7.31331e-25	CA3	NOS1AP
1051	4.39895e-87	1.16097	0.565	0.504	1.24512e-82	CA3	SH3GL2
1052	0.000853432	1.16007	0.436	0.447	1	CA3	EPHA5
1053	4.83669e-156	1.15995	0.647	0.517	1.36902e-151	CA3	SLC17A7
1054	6.17832e-148	1.13424	0.651	0.505	1.74877e-143	CA3	ENC1
1055	7.12017e-65	1.13079	0.574	0.495	2.01536e-60	CA3	CREG2
1056	6.14542e-130	1.11713	0.684	0.541	1.73946e-125	CA3	GALNT17
1057	6.09135e-15	1.11053	0.502	0.529	1.72416e-10	CA3	GALNT18
1058	1.53038e-10	1.11005	0.564	0.687	4.33174e-06	CA3	MSRA
1059	4.41116e-148	1.08472	0.59	0.454	1.24858e-143	CA3	LMO4
1060	2.45317e-34	1.08463	0.651	0.554	6.9437e-30	CA3	DLGAP2
1061	2.8383e-20	1.08461	0.472	0.526	8.03381e-16	CA3	PARP8
1062	2.60382e-45	1.08125	0.6	0.569	7.3701e-41	CA3	PDE1A
1063	5.31434e-28	1.07799	0.542	0.594	1.50422e-23	CA3	FOCAD
1064	0.00424922	1.07653	0.431	0.575	1	CA3	KCNQ1OT1
1066	5.79767e-141	1.07073	0.937	0.789	1.64103e-136	CA3	RBFOX1
1067	2.67183e-37	1.06238	0.423	0.389	7.5626e-33	CA3	NUP93
1068	5.15657e-123	1.05868	0.694	0.607	1.45957e-118	CA3	UCHL1
1069	1.45425e-271	1.05547	0.366	0.141	4.11625e-267	CA3	RSPO3
1070	4.23351e-11	1.05534	0.478	0.573	1.1983e-06	CA3	TEAD1
1071	1.83332e-88	1.05412	0.44	0.312	5.18921e-84	CA3	HPCA
1072	1.67383e-170	1.05222	0.328	0.144	4.73776e-166	CA3	SNTG2
1073	6.64141e-67	1.05051	0.809	0.833	1.87985e-62	CA3	MAP1B
1074	7.91142e-231	1.03948	0.848	0.694	2.23933e-226	CA3	SNAP25
1075	6.05251e-25	1.03947	0.514	0.482	1.71316e-20	CA3	HCN1
1076	1.3599e-148	1.0366	0.495	0.322	3.8492e-144	CA3	WIPF3
1077	2.69178e-145	1.0351	0.717	0.662	7.61909e-141	CA3	CHN1
1078	2.61512e-79	1.02933	0.743	0.599	7.40209e-75	CA3	NELL2
1079	4.95599e-56	1.02634	0.546	0.498	1.40279e-51	CA3	ANKRD30BL
1080	8.59169e-169	1.01861	0.553	0.398	2.43188e-164	CA3	PRKCG
1081	2.35621e-34	1.01843	0.555	0.523	6.66925e-30	CA3	THY1
1082	1.02813e-30	1.01339	0.614	0.558	2.91012e-26	CA3	FAM19A2
1083	4.30307e-25	1.01099	0.723	0.655	1.21798e-20	CA3	STXBP5L
1084	0.00254204	1.01067	0.524	0.606	1	CA3	TENM4
1085	2.13594e-113	0.997456	0.577	0.45	6.04577e-109	CA3	SCN3B
1086	7.84294e-15	0.994819	0.552	0.53	2.21995e-10	CA3	CACNA1B
1087	1.88607e-64	0.984305	0.662	0.603	5.33852e-60	CA3	GRIA3
1088	3.78686e-86	0.983287	0.69	0.572	1.07187e-81	CA3	HS6ST3
1089	1.84754e-40	0.982038	0.69	0.631	5.22947e-36	CA3	CCSER1
1090	5.08502e-148	0.980342	0.491	0.32	1.43932e-143	CA3	HOPX
1091	1.02613e-201	0.967207	0.348	0.141	2.90447e-197	CA3	CTXND1
1092	1.26378e-78	0.96619	0.454	0.346	3.57713e-74	CA3	MSC-AS1
1093	0	0.965327	0.291	0.071	0	CA3	TG
1094	3.79728e-127	0.952048	0.71	0.62	1.07482e-122	CA3	CAMK2B
1095	5.04384e-14	0.948853	0.513	0.517	1.42766e-09	CA3	SHANK2
1096	3.03729e-13	0.945399	0.58	0.6	8.59704e-09	CA3	CACNA1A
1097	3.75329e-78	0.942023	0.478	0.375	1.06237e-73	CA3	ANKRD33B
1098	1.98636e-176	0.941389	0.498	0.301	5.62239e-172	CA3	NEUROD2
1099	1.51441e-78	0.938704	0.458	0.346	4.28655e-74	CA3	C9orf16
1100	3.4645e-75	0.93434	0.628	0.554	9.80625e-71	CA3	SYN2
1101	3.83571e-23	0.928316	0.564	0.577	1.0857e-18	CA3	YWHAB
1102	1.26947e-141	0.924577	0.46	0.293	3.59323e-137	CA3	FGFR1
1103	0	0.923588	0.236	0.036	0	CA3	LINC02196
1104	2.64712e-24	0.921202	0.495	0.514	7.49268e-20	CA3	TMTC1
1105	1.97683e-61	0.921129	0.699	0.582	5.59543e-57	CA3	GRIN2B
1106	3.48168e-262	2.61264	0.944	0.42	9.8549e-258	CA2	NRGN
1107	1.2217e-261	2.58749	0.974	0.531	3.45803e-257	CA2	TUBA1B
1108	4.22087e-298	2.51446	0.756	0.181	1.19472e-293	CA2	RAB3B
1109	2.64525e-249	2.47951	0.994	0.826	7.48739e-245	CA2	MAP1B
1110	2.49666e-244	2.45798	0.985	0.732	7.0668e-240	CA2	CALM1
1111	2.73867e-266	2.45341	0.978	0.495	7.75182e-262	CA2	CALM3
1112	8.24876e-246	2.44032	0.968	0.569	2.33481e-241	CA2	YWHAG
1113	7.49863e-246	2.40798	0.927	0.446	2.12249e-241	CA2	PGM2L1
1114	2.80914e-232	2.37507	0.905	0.425	7.95126e-228	CA2	VSNL1
1115	8.86619e-236	2.34197	0.89	0.369	2.50957e-231	CA2	NEFL
1116	2.22551e-193	2.33124	0.86	0.473	6.29931e-189	CA2	ARPP19
1117	5.01831e-273	2.32955	0.713	0.172	1.42043e-268	CA2	RGS4
1118	4.35559e-251	2.32004	0.929	0.425	1.23285e-246	CA2	TSPYL1
1119	9.08683e-225	2.29666	0.933	0.522	2.57203e-220	CA2	NORAD
1120	3.81237e-152	2.28729	0.829	0.466	1.07909e-147	CA2	LMO4
1121	4.86884e-228	2.27665	0.909	0.436	1.37813e-223	CA2	STMN2
1122	2.20224e-237	2.20937	0.972	0.627	6.23344e-233	CA2	HSP90AB1
1123	4.12033e-196	2.20534	0.847	0.381	1.16626e-191	CA2	NEFM
1124	1.98093e-236	2.2047	0.981	0.635	5.60702e-232	CA2	IDS
1125	3.19438e-207	2.20054	0.942	0.518	9.04168e-203	CA2	ENC1
1126	2.43147e-227	2.19122	0.927	0.459	6.88227e-223	CA2	SCN3B
1127	2.05965e-133	2.18235	0.719	0.354	5.82983e-129	CA2	DIRAS2
1128	3.81392e-242	2.17448	0.991	0.71	1.07953e-237	CA2	SNAP25
1129	3.19574e-222	2.15625	0.898	0.416	9.04555e-218	CA2	PNMA2
1130	9.90839e-207	2.1555	0.927	0.519	2.80457e-202	CA2	THY1
1131	1.38525e-229	2.12453	0.976	0.664	3.92096e-225	CA2	CHN1
1132	2.66383e-182	2.12178	0.821	0.388	7.53997e-178	CA2	GABRA1
1133	8.62595e-229	2.11792	0.965	0.587	2.44158e-224	CA2	BASP1
1134	3.95199e-206	2.11193	0.937	0.568	1.11861e-201	CA2	YWHAB
1135	3.50869e-204	2.0881	0.832	0.343	9.93135e-200	CA2	TUBB2A
1136	1.27747e-172	2.08319	0.892	0.582	3.61588e-168	CA2	MAP1A
1137	6.92483e-204	2.07921	0.879	0.445	1.96007e-199	CA2	RAB6B
1138	4.44002e-196	2.0791	0.898	0.534	1.25675e-191	CA2	NDRG4
1139	1.51325e-157	2.05653	0.788	0.399	4.28326e-153	CA2	GAP43
1140	1.33031e-194	2.05392	0.935	0.663	3.76543e-190	CA2	PRNP
1141	4.60511e-180	2.03709	0.836	0.421	1.30348e-175	CA2	STMN1
1142	1.60944e-188	2.0289	0.898	0.428	4.55553e-184	CA2	SPARCL1
1143	6.51676e-200	2.02578	0.896	0.47	1.84457e-195	CA2	ACTG1
1144	3.41565e-192	2.02076	0.875	0.475	9.66798e-188	CA2	EIF4A2
1145	1.80198e-212	2.01758	0.963	0.613	5.1005e-208	CA2	UCHL1
1146	1.07895e-180	2.00281	0.778	0.337	3.05398e-176	CA2	SYT4
1147	9.8532e-220	2.00055	0.916	0.42	2.78895e-215	CA2	YWHAH
1148	3.32909e-182	1.99101	0.847	0.436	9.42298e-178	CA2	ATP6V1B2
1149	2.39593e-161	1.94881	0.79	0.399	6.78168e-157	CA2	STMN3
1150	3.08134e-182	1.94833	0.89	0.531	8.72173e-178	CA2	SERINC1
1151	9.06357e-194	1.94701	0.903	0.495	2.56544e-189	CA2	PHYHIP
1153	4.362e-171	1.9382	0.784	0.366	1.23466e-166	CA2	CDK5R1
1154	1.41317e-197	1.93525	0.935	0.649	3.99998e-193	CA2	PJA2
1155	1.61452e-169	1.92934	0.842	0.464	4.56991e-165	CA2	ENO2
1156	3.33534e-129	1.9278	0.702	0.337	9.44067e-125	CA2	PEG10
1157	1.94057e-201	1.92699	0.944	0.587	5.4928e-197	CA2	PEBP1
1158	5.18568e-159	1.91136	0.758	0.361	1.46781e-154	CA2	TAGLN3
1160	2.58907e-177	1.89081	0.901	0.59	7.32835e-173	CA2	FAIM2
1161	1.16042e-196	1.88313	0.959	0.692	3.28456e-192	CA2	GNAS
1162	1.41783e-159	1.88116	0.821	0.453	4.01315e-155	CA2	TOMM20
1163	4.75954e-160	1.85704	0.769	0.342	1.34719e-155	CA2	TMSB10
1164	5.32719e-192	1.85069	0.946	0.689	1.50786e-187	CA2	MAPK1
1165	7.31101e-158	1.85047	0.814	0.465	2.06938e-153	CA2	RNF11
1166	3.36989e-193	1.84708	0.827	0.342	9.53848e-189	CA2	BEX1
1167	3.19147e-151	1.8455	0.832	0.489	9.03345e-147	CA2	NAPB
1168	1.64529e-187	1.84057	0.933	0.664	4.657e-183	CA2	PREPL
1169	6.22357e-169	1.83268	0.86	0.515	1.76158e-164	CA2	PRKAR1B
1170	7.05611e-175	1.83058	0.901	0.607	1.99723e-170	CA2	STXBP1
1171	8.96804e-182	1.8088	0.924	0.646	2.5384e-177	CA2	YWHAZ
1172	2.51665e-117	1.80707	0.745	0.441	7.12337e-113	CA2	ZBTB18
1173	1.53989e-186	1.79943	0.924	0.528	4.35866e-182	CA2	SLC17A7
1174	1.33398e-137	1.79422	0.747	0.393	3.77582e-133	CA2	TOLLIP
1175	3.08631e-150	1.79156	0.745	0.355	8.7358e-146	CA2	SULT4A1
1176	1.84392e-154	1.79067	0.842	0.529	5.21923e-150	CA2	GDI1
1178	4.43305e-126	1.76916	0.793	0.471	1.25478e-121	CA2	LY6H
1179	6.70533e-153	1.7601	0.745	0.337	1.89794e-148	CA2	CEND1
1180	2.98926e-141	1.75465	0.834	0.495	8.4611e-137	CA2	DYNLL1
1181	4.3521e-186	1.7525	0.914	0.491	1.23186e-181	CA2	TMSB4X
1182	2.45663e-158	1.74042	0.838	0.463	6.95349e-154	CA2	PPIA
1183	7.60928e-136	1.73948	0.801	0.48	2.15381e-131	CA2	MTCH1
1184	2.27913e-155	1.73759	0.778	0.355	6.45108e-151	CA2	NLRP1
1185	2.83379e-177	1.73303	0.924	0.677	8.02105e-173	CA2	SYT11
1186	2.65363e-165	1.72954	0.821	0.389	7.51111e-161	CA2	BEX3
1187	1.30335e-137	1.72828	0.778	0.44	3.68914e-133	CA2	MTPN
1188	1.06528e-148	1.72109	0.767	0.362	3.01526e-144	CA2	PGAM1
1189	3.90334e-149	1.71915	0.868	0.499	1.10484e-144	CA2	CREG2
1190	3.12109e-162	1.71581	0.888	0.566	8.83425e-158	CA2	CKB
1191	2.47832e-136	1.71464	0.801	0.477	7.01487e-132	CA2	ARF1
1192	3.36267e-185	1.71445	0.978	0.789	9.51803e-181	CA2	HSP90AA1
1193	1.37092e-143	1.71316	0.715	0.317	3.8804e-139	CA2	GHITM
1195	8.23379e-126	1.71138	0.639	0.269	2.33057e-121	CA2	CPLX1
1196	3.09324e-190	1.71091	0.961	0.814	8.75541e-186	CA2	RTN3
1197	5.46651e-127	1.71045	0.819	0.572	1.5473e-122	CA2	KLC1
1198	1.43144e-151	1.70861	0.847	0.537	4.05168e-147	CA2	SYP
1199	1.55145e-158	1.70665	0.888	0.595	4.39139e-154	CA2	SARAF
1200	4.24211e-152	1.68805	0.814	0.386	1.20073e-147	CA2	TSPAN7
1201	4.96562e-122	1.68793	0.717	0.37	1.40552e-117	CA2	HPCAL4
1202	3.79433e-135	1.68628	0.737	0.366	1.07398e-130	CA2	BEX4
1203	9.39938e-132	1.68509	0.611	0.228	2.66049e-127	CA2	CHGA
1205	1.79156e-29	1.22005	0.337	0.182	5.07102e-25	CA2	PCP4
1206	1.55457e-143	1.6829	0.812	0.45	4.40021e-139	CA2	UBC
1207	0	2.14901	0.894	0.335	0	CA1	KIAA1217
1208	0	2.10792	0.561	0.128	0	CA1	ADAMTSL1
1209	0	2.01142	0.341	0.037	0	CA1	AC109466.1
1210	0	1.97175	0.998	0.504	0	CA1	RALYL
1211	0	1.95968	0.654	0.267	0	CA1	TSHZ2
1212	0	1.91153	0.869	0.197	0	CA1	PTPRT
1213	0	1.85809	0.923	0.478	0	CA1	CNTN5
1214	0	1.84132	0.849	0.16	0	CA1	KCNH7
1215	0	1.7903	0.976	0.532	0	CA1	ROBO2
1216	0	1.77587	0.989	0.448	0	CA1	KHDRBS2
1217	0	1.7278	0.948	0.38	0	CA1	ASIC2
1218	0	1.72697	0.954	0.434	0	CA1	CDH18
1219	0	1.70605	0.844	0.341	0	CA1	CDH12
1220	0	1.6979	0.582	0.141	0	CA1	ZNF804B
1221	0	1.65585	0.715	0.117	0	CA1	PCDH11Y
1222	0	1.64711	0.983	0.312	0	CA1	HECW1
1223	0	1.64458	0.91	0.328	0	CA1	NRG1
1224	0	1.64408	0.988	0.461	0	CA1	CNTNAP5
1225	0	1.62594	0.759	0.168	0	CA1	GALNTL6
1226	0	1.52278	0.996	0.491	0	CA1	RIMS2
1227	0	1.51222	0.992	0.626	0	CA1	IQCJ-SCHIP1
1228	0	1.49595	0.56	0.107	0	CA1	PCDH11X
1229	0	1.47456	0.934	0.325	0	CA1	LHFPL6
1230	0	1.47167	0.942	0.266	0	CA1	OLFM3
1231	0	1.46589	1	0.783	0	CA1	PTPRD
1232	0	1.45891	0.888	0.328	0	CA1	ZNF385B
1233	0	1.4032	0.859	0.167	0	CA1	FRAS1
1234	0	1.38818	0.998	0.494	0	CA1	SORBS2
1235	0	1.38544	0.632	0.198	0	CA1	CADPS2
1236	0	1.32006	0.587	0.062	0	CA1	COL24A1
1237	0	1.31775	0.853	0.107	0	CA1	MLIP
1238	0	1.30587	0.978	0.375	0	CA1	VSNL1
1239	0	1.29995	0.835	0.144	0	CA1	SATB2
1240	0	1.28515	0.898	0.321	0	CA1	CNTN4
1241	0	1.2767	0.256	0.021	0	CA1	AC008415.1
1242	0	1.27281	0.978	0.32	0	CA1	PTPRR
1243	0	1.26428	0.902	0.264	0	CA1	EFNA5
1244	0	1.26231	0.663	0.074	0	CA1	VWC2L
1245	0	1.23766	0.855	0.163	0	CA1	GHR
1246	0	1.23287	0.952	0.377	0	CA1	KCNB2
1247	0	1.2204	0.992	0.456	0	CA1	GABRB2
1248	0	1.21054	0.988	0.398	0	CA1	LINC01122
1249	0	1.20711	0.744	0.179	0	CA1	NELL1
1250	5.74943e-304	1.20665	0.589	0.23	1.62738e-299	CA1	BRINP3
1251	0	1.19506	0.998	0.631	0	CA1	OXR1
1252	0	1.18172	0.748	0.165	0	CA1	SORCS1
1253	0	1.18105	0.968	0.371	0	CA1	NRGN
1254	0	1.17326	1	0.628	0	CA1	STXBP5L
1255	0	1.16589	0.781	0.119	0	CA1	BMPER
1256	0	1.14361	0.976	0.546	0	CA1	HS6ST3
1257	0	1.13263	0.998	0.691	0	CA1	PHACTR1
1258	0	1.12583	0.637	0.25	0	CA1	HS3ST4
1259	0	1.12539	0.998	0.571	0	CA1	MDGA2
1260	0	1.12456	0.95	0.278	0	CA1	CHRM3
1261	0	1.12104	0.779	0.158	0	CA1	GRM8
1262	0	1.11207	0.937	0.289	0	CA1	GABRG3
1263	0	1.111	0.997	0.525	0	CA1	ARPP21
1264	0	1.10752	0.998	0.54	0	CA1	FGF12
1265	0	1.0965	0.639	0.133	0	CA1	KCNH5
1266	0	1.0955	0.974	0.443	0	CA1	PPM1L
1267	0	1.09434	0.948	0.266	0	CA1	GDA
1268	0	1.08854	0.95	0.335	0	CA1	GABRA1
1269	0	1.08829	0.999	0.622	0	CA1	RGS7
1270	0	1.0823	1	0.568	0	CA1	DCLK1
1271	0	1.0754	0.688	0.156	0	CA1	PKN2-AS1
1272	0	1.07202	0.985	0.477	0	CA1	ADAM23
1273	0	1.06373	0.972	0.416	0	CA1	ADCY1
1274	0	1.05913	0.885	0.414	0	CA1	CNTNAP3B
1275	0	1.05894	0.863	0.316	0	CA1	NCALD
1276	0	1.05856	0.973	0.344	0	CA1	MIAT
1277	0	1.05712	0.601	0.097	0	CA1	AC011287.1
1278	0	1.05477	0.999	0.554	0	CA1	AGBL4
1279	0	1.03976	0.864	0.305	0	CA1	DIRAS2
1280	0	1.02595	0.896	0.208	0	CA1	AC120193.1
1281	0	1.02322	0.991	0.459	0	CA1	SH3GL2
1282	0	1.0169	0.999	0.543	0	CA1	GRM5
1283	0	1.0102	0.994	0.529	0	CA1	DGKI
1284	0	1.00714	0.989	0.639	0	CA1	OPCML
1285	0	1.00435	0.986	0.43	0	CA1	KIAA1549L
1286	1.74909e-278	1.00199	0.988	0.837	4.95079e-274	CA1	LRP1B
1287	0	0.990295	0.995	0.486	0	CA1	SLC4A10
1288	0	0.985718	0.875	0.293	0	CA1	PRR16
1289	0	0.98379	0.494	0.138	0	CA1	TOX
1290	0	0.981515	0.998	0.632	0	CA1	SLC8A1
1291	0	0.978209	0.999	0.753	0	CA1	PDE4D
1292	0	0.977723	0.985	0.422	0	CA1	SV2B
1293	0	0.977322	0.996	0.634	0	CA1	CHN1
1294	0	0.970621	0.95	0.328	0	CA1	ITPR1
1295	0	0.969357	0.832	0.23	0	CA1	MAN1A1
1296	0	0.962266	0.985	0.551	0	CA1	DPP10
1297	0	0.9619	1	0.882	0	CA1	ANKS1B
1298	0	0.960116	0.785	0.116	0	CA1	RGS4
1299	0	0.957749	0.924	0.294	0	CA1	RAB27B
1300	0	0.951537	0.583	0.051	0	CA1	HS3ST2
1301	0	0.947529	1	0.719	0	CA1	NEGR1
1302	5.27964e-180	0.94524	0.469	0.204	1.4944e-175	CA1	NTNG1
1303	0	0.941966	0.971	0.445	0	CA1	LDB2
1304	0	0.940281	0.992	0.388	0	CA1	MTUS2
1305	0	0.938357	0.999	0.615	0	CA1	KALRN
1306	0	0.935544	0.951	0.353	0	CA1	ELAVL4
1307	0	0.716319	0.848	0.11	0	CA1	MPPED1
