# Supplementary material for: Transcriptome dynamics of hippocampal neurogenesis in macaques across the lifespan and aged humans
Source: Research Square preprint supplement (doi:10.21203/rs.3.rs-1015150/v1), 2021-11-18
Supplement: Supplementary file 12 [file e3c8cb1b85665d311d2c1093.xlsx]

## Sheet: Table S1
Supplementary Table1A. Summary of sample information for macaques
Animal No.	Age	Sex	Experimental Use
1	P0	male	snRNA-seq
2	0.5 years	male	snRNA-seq
3	1 years	male	snRNA-seq
4	2 years	male	snRNA-seq
5	4 years	male	snRNA-seq
6	4 years	male	snRNA-seq, BrdU, EdU
7	4 years	male	snRNA-seq, BrdU, EdU
8	10 years	male	snRNA-seq, BrdU, EdU
9	11 years	male	snRNA-seq
10	11 years	female	snRNA-seq
11	15 years	male	snRNA-seq
12	22 years	female	snRNA-seq
13	23 years	male	snRNA-seq, BrdU, EdU
Supplementary Table1B. Summary of sample information for humans
Patient ID	Gender	Age	Couse of death	Diagnose	Death time	PMD(hours)	Experimental use
PTB229	F	52	Respiratory failure	Uterine tumors	2019-02-19 14:16:00	22.7	IF
PTB298	M	67	Rectal cancer	Intestinal obstruction	2020-08-22 18:50:00	5	RNA-seq，IF
PTB218	M	78	Pulmonary Infection		2018-09-04 02:46:00	13.5	IF
PTB202	F	85		Coma one week	2018-01-10 16:00:00	20.5	RNA-seq，IF
PTB215	M	87	Organ Failure	Arteriosclerosis	2018-07-05 03:10:00	9	RNA-seq
PTB234	M	92	Respiratory failure	Arteriosclerosis	2019-04-26 09:15:00	6	RNA-seq
