# Supplementary material for: Transcriptome dynamics of hippocampal neurogenesis in macaques across the lifespan and aged humans
Source: Research Square preprint supplement (doi:10.21203/rs.3.rs-1015150/v1), 2021-11-18
Supplement: Supplementary file 13 [file fde87bfad98baa717157be46.xlsx]

## Sheet: Table S5
Supplementary Table5: differentially expressed genes between macaque NSC and mouse NSC
Log2FoldChange	Averaged.expression	gene	group	spec
-0.464629	0.789493	PISD	conserved	other
-0.749337	0.422782	DDX3Y	conserved	other
1.15853	0.692562	CHST9	conserved	other
0.675298	2.07116	CDH2	conserved	other
0.457874	0.753906	CSNK1G3	conserved	other
-0.326561	0.503595	TRIB2	conserved	other
1.47144	1.04501	HEATR5A	conserved	other
-0.417402	0.36613	DTD2	conserved	other
0.967157	0.871239	NUBPL	conserved	other
-1.70337	1.29197	NPC2	mouse	other
-0.720244	0.464771	ISCA2	conserved	other
0.723539	2.15734	ARHGAP5	conserved	other
1.93829	1.39427	AKAP6	monkey	other
4.03119	4.84524	NPAS3	monkey	other
0.798126	0.493303	FAM169A	conserved	other
-1.84232	1.322	NDUFB4	mouse	other
0.0341201	0.701775	MARF1	conserved	other
0.0868471	0.411686	EGLN3	conserved	other
-1.97113	1.29888	SPTSSA	mouse	other
-0.201409	0.803746	FSTL1	conserved	other
-0.800901	0.82914	STARD3NL	conserved	other
-1.08298	1.06433	LRRC58	conserved	other
0.703383	0.427451	GPR156	conserved	other
-0.478265	0.583043	PHAX	conserved	other
0.351253	1.88171	GSK3B	conserved	other
-0.640246	0.479104	LMNB1	conserved	other
-0.798334	0.453698	EPDR1	conserved	other
0.055489	0.519357	NDE1	conserved	other
-0.712665	0.399898	EAPP	conserved	other
-1.19032	0.714592	KLF9	conserved	other
1.58361	1.05435	TIAM1	monkey	other
-0.0578079	0.533058	B4GALT6	conserved	other
-0.657809	0.650256	CCS	conserved	other
2.05464	1.73055	MEGF10	monkey	other
-0.0508349	1.01301	SNX6	conserved	other
-0.83559	0.818391	SOD1	conserved	other
-0.465788	0.454835	PAK1IP1	conserved	other
-0.789744	0.448249	ADPRH	conserved	other
0.472347	0.628889	TIMMDC1	conserved	other
0.0745861	0.469535	POGLUT1	conserved	other
-0.16422	0.55018	SLC12A2	conserved	other
0.521229	0.464204	SCAF4	conserved	other
1.06161	0.7491	ELMO1	conserved	other
-1.59889	1.19015	CFL2	mouse	other
0.822681	0.511628	PTAR1	conserved	other
1.43789	1.03402	FAM189A2	conserved	other
-0.530944	0.417288	ISOC1	conserved	other
0.0441946	0.5584	TRIM27	conserved	other
0.75643	0.640252	LPIN1	conserved	other
0.348234	0.358471	GFM2	conserved	other
-0.425716	0.740192	FXN	conserved	other
-1.03017	0.714305	MRPL11	conserved	other
-0.0318663	0.746164	DCTN4	conserved	other
1.20599	1.04592	NOL4	conserved	other
1.69626	1.46571	ARHGAP31	monkey	other
-0.311985	0.384259	RBM22	conserved	other
-0.674208	1.25141	NTSR2	conserved	other
0.499856	0.795882	YLPM1	conserved	other
1.25236	1.01387	MOK	conserved	other
-0.0713961	0.396766	PTDSS1	conserved	other
2.98924	3.74646	DTNA	monkey	other
1.71542	1.53091	IGSF11	monkey	other
1.1467	0.849457	ELOVL2	conserved	other
3.99143	4.68202	LSAMP	monkey	other
-0.106906	0.396174	CINP	conserved	other
0.313793	0.434422	NEDD9	conserved	other
0.603757	1.13265	MAPRE2	conserved	other
0.508808	0.334917	PGBD1	conserved	other
-0.157663	0.513799	GAP43	conserved	other
0.0503941	0.471485	ZSCAN26	conserved	other
-0.393131	0.209915	TMEM170B	conserved	other
0.684992	0.857012	SYNJ1	conserved	other
1.20214	1.46815	SREBF2	conserved	other
-0.0738222	0.314885	TCOF1	conserved	other
0.0443825	0.550117	PPP2R3C	conserved	other
2.09335	1.43216	KANK1	monkey	other
-0.223562	0.532755	SLC16A2	conserved	other
0.348468	0.857979	GALNT1	conserved	other
1.27458	1.17597	HIVEP1	conserved	other
1.6575	1.10626	SNTB1	monkey	other
2.30344	1.80871	TECPR2	monkey	other
0.609635	0.804195	RPRD1A	conserved	other
-0.405337	0.416569	RLIM	conserved	other
-0.412628	0.444331	SLC39A6	conserved	other
-1.28214	4.04588	ZBTB20	conserved	other
-0.208976	0.297536	EIF2B2	conserved	other
-0.84223	0.588157	YIF1A	conserved	other
1.05185	0.995264	CAMK2A	conserved	other
0.438681	0.490244	NHLRC2	conserved	other
-0.622473	0.659074	CNIH2	conserved	other
-0.60125	0.366433	RAB1B	conserved	other
0.587898	0.553382	RCOR1	conserved	other
0.473712	0.522159	ELP2	conserved	other
0.447348	0.349872	ABCB7	conserved	other
0.688677	0.538633	MLH3	conserved	other
-0.256639	0.275608	CENPM	conserved	other
1.52519	1.10545	PACS1	monkey	other
2.68854	2.27524	ZHX2	monkey	other
-0.509901	0.761557	NFKBIA	conserved	other
-0.220692	0.469962	DERL1	conserved	other
1.10045	0.964661	ROCK2	conserved	other
0.577127	0.906174	PDGFRB	conserved	other
-1.29009	1.08514	SF3B2	conserved	other
0.523482	1.01186	CTCF	conserved	other
0.362841	0.639507	NEK9	conserved	other
2.98403	2.29531	NR3C2	monkey	other
0.494279	0.374246	HMGXB3	conserved	other
0.880229	1.13256	PSPC1	conserved	other
0.548493	0.700503	TRAF3	conserved	other
3.10731	3.18404	PHACTR1	monkey	other
-0.802646	1.33087	TMED10	conserved	other
1.71962	1.2478	SPIDR	monkey	other
1.34813	0.882665	FHOD3	conserved	other
0.731674	1.57554	PCM1	conserved	other
-1.45104	1.14772	S1PR1	conserved	other
-0.998798	0.667578	CETN2	conserved	other
-0.552085	0.302292	ZMYM5	conserved	other
0.5224	0.394995	PKP2	conserved	other
-0.980921	0.572271	MZT1	conserved	other
-3.91688	3.10661	FOS	mouse	other
0.316191	0.462534	CCDC191	conserved	other
0.43654	0.435548	DPH5	conserved	other
-0.496733	0.287374	ACD	conserved	other
-0.876825	0.695202	ANKRA2	conserved	other
-0.65128	0.428173	PBDC1	conserved	other
-0.404476	0.739618	PDIA6	conserved	other
-0.46319	0.287375	EIF1AD	conserved	other
-2.39003	1.82982	SMDT1	mouse	other
-1.55445	1.30578	NDUFB5	mouse	other
-0.447109	0.508162	NSDHL	conserved	other
0.976131	0.891003	CDC42BPB	conserved	other
0.223074	0.422647	IFNAR1	conserved	other
-0.289812	0.490321	ASAH1	conserved	other
-0.1433	0.429054	TPGS2	conserved	other
0.618312	0.537214	SLC30A7	conserved	other
1.80921	1.49179	ZMYM2	monkey	other
-0.205025	0.625389	IFNGR2	conserved	other
-0.56318	0.380992	PARD6A	conserved	other
-1.06798	0.751054	DRAP1	conserved	other
-0.39789	0.404082	TDRKH	conserved	other
-2.35683	1.61411	NDUFA6	mouse	other
1.94268	1.45195	GRAMD1C	monkey	other
-2.95452	2.12957	BTF3	mouse	other
0.738309	0.548611	CRYL1	conserved	other
0.0907663	0.571363	CELF4	conserved	other
0.624935	0.368181	USP13	conserved	other
-1.83761	1.19351	SEC61B	mouse	other
-0.289919	0.33866	TBC1D7	conserved	other
-0.0253819	0.389649	EXTL2	conserved	other
-0.353298	0.245426	LGALS3	conserved	other
1.03224	0.619414	GFOD1	conserved	other
1.10885	0.754798	IFT88	conserved	other
-0.610931	0.354266	FIBP	conserved	other
-0.531022	0.289806	TMEM65	conserved	other
0.780303	1.08479	DNM1L	conserved	other
0.969957	0.762595	SIRT5	conserved	other
-0.338885	0.235089	MRPL9	conserved	other
0.832166	0.63696	SRBD1	conserved	other
1.41394	1.07015	PIBF1	conserved	other
-0.0561478	0.826716	DNAJB4	conserved	other
1.19448	0.857864	PIK3C3	conserved	other
0.683348	0.443256	RANBP10	conserved	other
0.0860767	0.405789	EFEMP2	conserved	other
0.441565	0.392134	NOL10	conserved	other
0.680574	0.6434	IFT80	conserved	other
0.826053	1.69287	ZMIZ1	conserved	other
-0.149761	0.761386	TMEM184C	conserved	other
-0.964626	0.955842	NOL7	conserved	other
1.77129	1.59325	PRKCE	monkey	other
0.657072	0.41571	HPCAL1	conserved	other
-1.21144	0.757909	RIIAD1	conserved	other
-0.715862	0.943975	NAA50	conserved	other
0.51054	0.345506	RIT2	conserved	other
-1.08972	0.65747	VCAM1	conserved	other
-0.253701	0.339331	TAPBP	conserved	other
2.0517	1.37308	KLF12	monkey	other
-0.559051	0.332395	THAP11	conserved	other
-1.191	1.395	EIF5	conserved	other
0.544174	0.64157	XPO4	conserved	other
-0.190126	0.376163	SMC4	conserved	other
0.721641	0.772035	SNX32	conserved	other
1.43841	1.3725	ARHGEF7	conserved	other
2.1733	1.82376	ADCY2	monkey	other
0.484032	0.419989	EPAS1	conserved	other
0.430461	0.497945	NUAK1	conserved	other
0.773277	0.827138	RANBP9	conserved	other
0.54109	0.326943	LONRF3	conserved	other
-0.420073	0.331244	CKAP4	conserved	other
-0.731628	0.785416	CCT2	conserved	other
0.661085	0.891768	RHOQ	conserved	other
0.999389	0.836305	CDC14A	conserved	other
0.130396	0.457499	PIGF	conserved	other
-0.920745	0.827512	PGRMC1	conserved	other
0.248814	0.613718	RGL2	conserved	other
0.430254	0.679695	FCHO2	conserved	other
1.02299	0.76887	TATDN1	conserved	other
0.592652	1.72372	ATRX	conserved	other
0.496646	0.43054	FRS2	conserved	other
0.338694	0.726294	KPNA4	conserved	other
-0.914759	0.642904	YEATS4	conserved	other
0.375273	0.378828	POLR3B	conserved	other
0.556202	0.319186	SIDT1	conserved	other
-1.95904	1.58267	NDUFB9	mouse	other
1.7818	1.83784	MARK3	monkey	other
-0.187536	0.494848	RTCA	conserved	other
0.747274	0.815648	MCUR1	conserved	other
1.84647	1.54367	PPM1L	monkey	other
-0.770173	0.757403	RNF182	conserved	other
-1.09949	0.691541	MRPL57	conserved	other
0.0874626	0.46062	TBC1D4	conserved	other
0.366601	0.798906	FAT1	conserved	other
-0.0218153	0.544387	SLC25A46	conserved	other
1.95372	1.6077	RALGAPA1	monkey	other
-1.4018	0.948826	PFDN6	conserved	other
0.791215	0.844452	DBT	conserved	other
-1.26268	2.8377	SON	conserved	other
0.446794	1.09403	ZDHHC20	conserved	other
0.742991	0.534604	SAP130	conserved	other
0.551244	0.443236	FBXO34	conserved	other
0.991297	1.23942	MTSS1	conserved	other
0.950548	1.23574	TNPO1	conserved	other
-0.483748	0.709575	MAGT1	conserved	other
1.3954	1.04148	BOC	conserved	other
2.06411	1.40921	PEX5L	monkey	other
1.5476	1.03087	SLC10A7	monkey	other
-1.13892	0.679048	COMMD6	conserved	other
0.973428	0.867	MICU2	conserved	other
-0.478006	0.582343	AMMECR1L	conserved	other
0.428679	1.42828	SLCO1C1	conserved	other
2.39121	2.3169	FGD4	monkey	other
-0.727805	0.553471	POLR2D	conserved	other
-0.95132	1.10694	SQLE	conserved	other
0.909135	0.663618	RIC8B	conserved	other
-0.131726	0.382451	NSUN2	conserved	other
-0.528827	0.438351	TMEM263	conserved	other
-1.94567	1.45905	COX7B	mouse	other
1.09971	1.02898	WDR33	conserved	other
-0.706582	0.658648	UBE2A	conserved	other
0.278666	0.450923	CRY1	conserved	other
1.1833	0.943178	RICTOR	conserved	other
0.67393	0.779418	HK1	conserved	other
0.413022	0.378339	LMO7	conserved	other
-2.04409	1.35731	LSM6	mouse	other
-0.127447	0.661265	JAM3	conserved	other
0.4929	0.45476	FBXO38	conserved	other
-1.1205	0.833994	REXO2	conserved	other
0.429333	0.331443	MRPS27	conserved	other
0.389274	0.402846	TUBGCP3	conserved	other
0.311612	0.830049	SNX27	conserved	other
-0.0027123	1.83153	MAP1B	conserved	other
2.01556	1.83474	JARID2	monkey	other
-0.401142	0.397552	M6PR	conserved	other
1.76892	1.78327	NSMCE2	monkey	other
-0.244859	0.26003	BAG5	conserved	other
0.0438193	0.40781	BRMS1L	conserved	other
2.02588	1.35944	ZBTB16	monkey	other
0.129738	0.463558	IWS1	conserved	other
0.291874	0.589382	MBIP	conserved	other
0.14763	0.594177	MDM2	conserved	other
0.048974	0.544102	FBXL3	conserved	other
-0.638549	0.354318	PSMB10	conserved	other
-0.400436	0.340956	VLDLR	conserved	other
-0.470804	0.254523	LCAT	conserved	other
0.532602	0.315589	OSMR	conserved	other
0.292846	0.882388	PCMTD1	conserved	other
0.287123	0.485529	MCCC2	conserved	other
0.538494	0.548112	MAP3K2	conserved	other
1.62988	1.08749	PTPRK	monkey	other
0.49901	0.557575	CAB39L	conserved	other
0.284821	0.782185	SMAD1	conserved	other
0.550314	0.466372	S100PBP	conserved	other
0.244952	0.541893	UXS1	conserved	other
0.679976	0.655754	ATP11A	conserved	other
0.637458	0.618635	ICE1	conserved	other
1.13353	0.940954	DTNBP1	conserved	other
1.56898	0.992517	ATP8A2	monkey	other
-0.131609	0.401964	BIN1	conserved	other
-0.510119	0.346997	RRP7A	conserved	other
1.33577	1.20878	USP24	conserved	other
3.43567	2.87831	OPCML	monkey	other
1.627	2.16437	MYCBP2	monkey	other
-0.340067	0.258568	HAUS7	conserved	other
-0.277387	0.43537	POLDIP3	conserved	other
1.89185	1.91324	RFX3	monkey	other
-4.57177	3.63119	RPL39	mouse	other
4.74233	4.99914	NTM	monkey	other
-0.428985	1.34756	AGL	conserved	other
-0.434358	0.639087	UPF3B	conserved	other
0.350466	0.541071	OTUD4	conserved	other
-0.0843845	0.382039	CYB5R3	conserved	other
1.34191	1.10175	BDP1	conserved	other
0.656423	1.11117	CRYZL1	conserved	other
-0.268657	0.398275	NKAP	conserved	other
1.10605	0.830697	CAMK4	conserved	other
-0.238531	0.279683	STARD4	conserved	other
-0.428476	0.369772	DHCR24	conserved	other
-1.53075	1.0866	NDUFA1	mouse	other
3.62984	2.83968	ABLIM1	monkey	other
-2.32046	1.96957	CNBP	mouse	other
2.13329	1.69651	LIFR	monkey	other
-0.473079	0.906388	NREP	conserved	other
0.794859	0.483128	SNTG1	conserved	other
-0.142457	0.447727	ABCE1	conserved	other
0.0906752	0.539029	VPS26A	conserved	other
-0.380064	0.404332	RING1	conserved	other
0.782036	0.506145	USP28	conserved	other
0.59544	0.429583	SERPINI1	conserved	other
0.163553	0.802687	ANAPC10	conserved	other
-1.26653	1.23669	CCDC80	conserved	other
0.497076	0.373292	NUP107	conserved	other
0.723296	0.729962	ZBTB8OS	conserved	other
-0.636223	0.355132	RRS1	conserved	other
-0.563111	0.616173	ATG3	conserved	other
-0.577144	0.62008	IVNS1ABP	conserved	other
1.43355	1.49156	ASAP2	conserved	other
0.474857	1.38902	MAPK1	conserved	other
1.2491	1.52879	FBXO11	conserved	other
0.496898	0.39444	DUS2	conserved	other
0.394113	0.393156	ZBTB44	conserved	other
-0.298217	0.872311	SMARCA5	conserved	other
0.0613785	0.47388	GMPR	conserved	other
1.06099	0.915037	DENND6A	conserved	other
0.501279	0.339327	PALMD	conserved	other
-0.0449217	0.405357	CD200	conserved	other
0.860666	0.613809	ARFGAP3	conserved	other
-1.554	0.976837	TTC14	mouse	other
1.15279	1.23399	GAB1	conserved	other
-1.65362	1.29184	TSN	mouse	other
0.827545	0.753362	FOXN2	conserved	other
1.84712	1.85581	ATXN1	monkey	other
0.954367	0.684148	NFATC3	conserved	other
-0.394823	0.354432	NIFK	conserved	other
0.542258	0.666348	BSDC1	conserved	other
0.421712	0.749269	IFT43	conserved	other
-2.0211	1.52134	NDUFS6	mouse	other
-0.360282	0.23555	TWF2	conserved	other
0.54843	0.511089	PPP1R21	conserved	other
1.12241	1.11487	CAP2	conserved	other
0.203888	0.500989	MTMR6	conserved	other
1.31698	1.30118	SWT1	conserved	other
-3.44788	2.79984	MARCKSL1	mouse	other
-0.261968	0.3453	FAM8A1	conserved	other
1.23538	0.94639	MIPOL1	conserved	other
-0.17657	0.42912	TTC4	conserved	other
-1.30466	0.944387	TAGLN3	conserved	other
0.739258	0.421761	CDS1	conserved	other
2.04718	2.3442	APC	monkey	other
-0.561651	0.307986	PPIL2	conserved	other
1.64383	1.48679	CEP170	monkey	other
-0.170445	0.417422	PRMT7	conserved	other
0.390295	0.790936	DDX50	conserved	other
1.93413	1.52317	WDR70	monkey	other
-0.136611	0.418757	COPG1	conserved	other
-0.356268	0.915042	CDK6	conserved	other
-0.844647	1.38712	FUBP1	conserved	other
-0.639471	0.580471	RTCB	conserved	other
0.641275	0.372275	INPP4B	conserved	other
0.301125	0.759015	ECHDC1	conserved	other
-0.606675	0.509318	SLC39A7	conserved	other
-0.124024	0.500995	TRMT1L	conserved	other
0.773774	0.672738	SLAIN1	conserved	other
-1.00336	1.40621	REEP5	conserved	other
-1.62538	1.03042	EIF3I	mouse	other
-1.29885	0.790909	TXNL1	conserved	other
-0.437412	0.256752	SDF2L1	conserved	other
-0.397275	0.625865	RNF146	conserved	other
0.74608	0.511824	GPATCH2L	conserved	other
0.433582	0.596254	CLCN6	conserved	other
-0.0957503	0.613	RNF2	conserved	other
0.543327	0.434413	FBXO7	conserved	other
0.477421	0.608637	NUP153	conserved	other
0.514309	1.36494	EDNRB	conserved	other
-0.623003	0.411176	OARD1	conserved	other
1.01425	0.798499	ZFP90	conserved	other
-0.873118	0.501626	MAGED2	conserved	other
0.371663	0.568345	CPSF3	conserved	other
-0.979719	0.883723	VPS29	conserved	other
0.80761	0.678024	MIPEP	conserved	other
0.94543	0.635367	FAM13B	conserved	other
0.820839	0.537023	SYN3	conserved	other
-0.496178	0.47409	PAQR4	conserved	other
0.510151	0.366349	USP45	conserved	other
0.343214	0.385608	FAM160B1	conserved	other
-0.23163	0.323896	VCPIP1	conserved	other
1.22899	1.88503	TIMP3	conserved	other
1.3604	1.07669	PRR14L	conserved	other
0.279281	0.652345	TPP2	conserved	other
-0.599005	0.592306	FAM216A	conserved	other
0.221164	0.698372	SEC23A	conserved	other
-0.427205	0.369072	ZDHHC4	conserved	other
1.69067	1.36653	WDR7	monkey	other
0.60087	0.851639	FLYWCH1	conserved	other
-0.412458	0.539887	APPL1	conserved	other
-0.22834	0.385964	IAH1	conserved	other
-0.307484	0.431057	FLYWCH2	conserved	other
1.15117	1.60369	NIPBL	conserved	other
1.14546	0.715734	RNF150	conserved	other
1.47011	0.984313	TANGO6	conserved	other
-0.408885	1.39771	TNFRSF19	conserved	other
2.00909	1.54032	KIF13A	monkey	other
-0.192739	0.769204	ZFYVE21	conserved	other
-0.562421	1.19784	APLP2	conserved	other
0.649299	0.581445	BRWD3	conserved	other
0.68205	0.504241	PEX1	conserved	other
0.845296	0.75016	SACS	conserved	other
0.442774	1.1035	CCAR1	conserved	other
-1.31327	1.94387	SRRM2	conserved	other
-0.861132	0.493885	DRAXIN	conserved	other
-0.50096	0.445878	GOLT1B	conserved	other
-0.495237	0.501223	CLPTM1L	conserved	other
-0.668803	0.660783	TRAPPC6B	conserved	other
-0.950544	0.552181	GOLIM4	conserved	other
0.510809	0.289467	ANGEL1	conserved	other
2.23706	1.66582	SDCCAG8	monkey	other
1.08592	0.726986	PPP1R13B	conserved	other
0.132452	0.442757	MLLT6	conserved	other
-0.246792	0.790066	BRD8	conserved	other
0.440386	5.19038	SLC1A3	conserved	other
0.816437	0.640872	PLPPR4	conserved	other
-1.34216	0.821837	PNN	conserved	other
1.23145	0.805023	ARHGEF3	conserved	other
-0.465293	0.292759	IQCC	conserved	other
1.25519	0.760003	TRIM58	conserved	other
1.50966	1.23332	PI4KA	monkey	other
0.0401457	0.430292	HMGN5	conserved	other
-0.92967	0.58179	MAD2L2	conserved	other
-0.618085	1.10966	SH3BGRL	conserved	other
-0.19743	0.557637	GATAD1	conserved	other
2.4078	3.26316	NCAM1	monkey	other
0.571811	0.872577	KPNA3	conserved	other
0.84585	1.00037	FSTL5	conserved	other
0.8266	1.07728	RBM26	conserved	other
0.64736	0.362877	EFCAB6	conserved	other
2.57237	2.38752	DAAM2	monkey	other
-1.17929	0.770899	CCDC28B	conserved	other
0.701197	0.506235	PLPPR5	conserved	other
-0.602396	0.332414	NIP7	conserved	other
1.23701	1.24804	TET1	conserved	other
-0.158237	0.418605	TXLNA	conserved	other
2.72841	2.13826	AKT3	monkey	other
1.17981	0.785058	SHANK2	conserved	other
0.656595	0.394243	KIF6	conserved	other
2.06488	1.79504	POGZ	monkey	other
0.736461	0.472882	PRDM10	conserved	other
-0.364029	0.232249	FBXO6	conserved	other
-2.10695	1.40812	NDUFB7	mouse	other
0.375217	0.435442	TERF2	conserved	other
0.230069	0.39598	SMYD4	conserved	other
1.66497	1.49496	ATP8A1	monkey	other
-0.0855757	0.369732	FECH	conserved	other
0.663698	0.41042	PNPLA3	conserved	other
1.80788	1.70008	ITSN1	monkey	other
-0.270526	0.607096	SAMM50	conserved	other
0.573646	0.327142	SLC1A1	conserved	other
0.938398	1.05942	XPO1	conserved	other
0.733967	0.521786	WNK3	conserved	other
0.0928645	0.831785	CYB5B	conserved	other
0.646783	0.64397	PARVB	conserved	other
0.439338	0.556705	ADAM17	conserved	other
0.576856	0.457503	AP3B2	conserved	other
-0.847489	0.704691	PTS	conserved	other
1.57782	1.06188	ATRNL1	monkey	other
0.19994	0.662367	CAND1	conserved	other
0.523686	0.477888	KPNA6	conserved	other
-0.748256	0.422105	IL18	conserved	other
-0.51095	0.707784	NDFIP2	conserved	other
0.660641	0.411664	PLCL2	conserved	other
0.920044	0.752947	EDEM3	conserved	other
0.415743	0.368335	TMEM39B	conserved	other
0.59829	0.452817	KDM1B	conserved	other
-1.38077	0.907405	PSMB4	conserved	other
-0.636296	0.900874	KHDRBS1	conserved	other
-0.769191	1.21631	PTP4A2	conserved	other
0.874467	0.67619	CCDC66	conserved	other
0.0895888	0.437809	CDC23	conserved	other
-1.5628	1.21097	PSMB3	mouse	other
-0.20171	0.539691	RPN1	conserved	other
0.237118	0.429092	MCF2L	conserved	other
2.08244	1.41042	DPYD	monkey	macaque_enriched
4.96649	5.78967	NRXN1	monkey	other
-1.91215	1.25208	TIMM8B	mouse	other
2.03715	1.46774	PHF21B	monkey	other
-1.01646	0.751192	SPRY2	conserved	other
1.91888	1.58227	RAPGEF2	monkey	other
-0.446208	0.662554	KDELR2	conserved	other
0.844218	0.487905	RNF144B	conserved	other
-0.605735	0.334427	TSEN15	conserved	other
0.749025	0.86974	XPO6	conserved	other
0.264754	1.31409	EPHA4	conserved	other
-0.908573	0.640361	FBXO2	conserved	other
0.854289	0.781062	PIP4K2B	conserved	other
0.445117	1.02513	SSBP3	conserved	other
-0.764056	0.591797	MRPS7	conserved	other
0.760036	0.514875	SPEF2	conserved	other
-0.11193	0.365298	CDC37L1	conserved	other
-0.515045	1.57052	ID4	conserved	other
2.4836	2.12817	WDFY3	monkey	other
0.311943	0.535993	RAD17	conserved	other
0.62685	0.399615	COLGALT2	conserved	other
-0.332125	0.447167	BCAP31	conserved	other
-0.357144	0.258087	TEX30	conserved	other
0.662477	0.414677	FAM120C	conserved	other
0.826712	0.725429	NCOA7	conserved	other
5.32675	4.65803	GPC5	monkey	other
0.373513	0.56223	EEFSEC	conserved	other
0.834946	0.574272	FNIP2	conserved	other
1.20425	1.11561	KDM3B	conserved	other
2.1168	1.86142	ASAP1	monkey	other
2.20065	1.61865	TBC1D5	monkey	other
2.42318	1.90808	ERC2	monkey	other
1.37166	1.5461	PTBP2	conserved	other
0.265361	0.489966	PHF2	conserved	other
-0.330891	0.926413	DESI2	conserved	other
-0.376165	0.29678	GSTZ1	conserved	other
-2.15654	1.50068	EGR1	mouse	other
1.33715	0.94651	AIFM3	conserved	other
-0.838245	0.479165	ETF1	conserved	other
-0.867371	0.804143	COX20	conserved	other
-1.15604	0.690842	HSPA9	conserved	other
0.36293	0.722965	CTTN	conserved	other
0.437472	0.793533	FXR1	conserved	other
1.10664	0.681908	KCTD8	conserved	other
-0.19695	0.409923	RUVBL1	conserved	other
-0.232591	0.319532	MRPL37	conserved	other
0.563301	0.635745	RUFY2	conserved	other
-0.337474	0.666981	AK3	conserved	other
0.509037	0.530084	TAF1B	conserved	other
-0.361476	0.657557	LASP1	conserved	other
0.163674	0.564227	SATB1	conserved	other
3.11165	3.09162	GPC6	monkey	other
2.12504	1.42456	WDFY2	monkey	other
-0.831881	0.668734	MRPS6	conserved	other
1.34525	1.10709	SIL1	conserved	other
0.721052	0.917873	ANKIB1	conserved	other
0.37097	0.983693	DZIP3	conserved	other
1.87549	1.36287	RGL1	monkey	other
0.421669	0.327989	EIF2AK3	conserved	other
2.78357	2.24038	ARHGAP32	monkey	other
0.867249	0.541406	HSPA12A	conserved	other
0.790568	0.702293	MTOR	conserved	other
-0.985797	0.941408	CTSB	conserved	other
1.06316	0.640951	ARHGAP24	conserved	other
-0.593828	0.501237	SEC61A1	conserved	other
-0.761766	0.63543	GIPC1	conserved	other
0.402391	0.50549	JAK2	conserved	other
0.301718	0.738395	GRB2	conserved	other
0.267287	0.63128	SORBS2	conserved	other
-0.561312	0.486595	HDDC2	conserved	other
0.532614	0.330265	HDX	conserved	other
2.47427	1.78611	CACNA2D3	monkey	other
-0.515735	0.60996	HNRNPH3	conserved	other
1.62709	1.03171	KBTBD12	monkey	macaque_enriched
-1.55185	1.04111	SSR4	mouse	other
1.9125	2.03876	USP34	monkey	other
-0.210938	0.81354	FDFT1	conserved	other
0.974936	1.49756	FAM120A	conserved	other
-1.37881	1.31426	TMEM59	conserved	other
-0.749404	0.65755	AHSA1	conserved	other
1.44791	1.03417	SLC17A5	conserved	other
1.05992	0.715188	SHTN1	conserved	other
1.70348	1.27288	TPD52L1	monkey	other
-0.573126	1.56283	HNRNPU	conserved	other
0.116434	0.742226	TCAF1	conserved	other
0.320689	1.42568	ATP2A2	conserved	other
0.517809	0.565235	SPTLC2	conserved	other
0.201601	0.507634	ETFDH	conserved	other
-1.45541	1.47815	PAIP2	conserved	other
0.83178	0.630174	RNF217	conserved	other
-0.354616	0.66725	PLGRKT	conserved	other
2.8669	2.10596	NKAIN2	monkey	macaque_enriched
-0.423702	0.335731	FAM167A	conserved	other
-0.0814459	0.487293	ALKBH1	conserved	other
0.502201	1.4292	ACSL3	conserved	other
-0.521446	1.31443	RAB5A	conserved	other
-1.13293	1.13407	SLIRP	conserved	other
0.312174	0.715062	HOMER2	conserved	other
1.56726	1.14704	MBOAT2	monkey	other
-0.449842	0.242384	PDZD8	conserved	other
-0.990627	1.01356	EMX2	conserved	other
1.78666	1.38477	KAT2B	monkey	other
-0.132383	0.529509	DNAJC18	conserved	other
0.348522	0.502634	APOOL	conserved	other
0.328529	1.47568	RAB11FIP2	conserved	other
-0.616293	0.917768	PCBP4	conserved	other
-0.635831	0.936353	FAM204A	conserved	other
-0.374619	0.361634	THAP7	conserved	other
-0.778227	0.440964	HSPB11	conserved	other
-0.465786	0.753895	SNW1	conserved	other
1.78411	1.43167	PPFIA1	monkey	other
-0.350381	0.559201	GUF1	conserved	other
0.35769	1.15285	CLDN10	conserved	other
-1.1327	0.831542	KRCC1	conserved	other
-0.300375	0.708103	IFT57	conserved	other
1.103	0.742569	FBLN1	conserved	other
1.07395	0.835063	TMEM94	conserved	other
0.717709	0.780608	CHM	conserved	other
0.204351	0.51203	UBXN2B	conserved	other
-0.263417	0.280417	SPNS1	conserved	other
-0.417069	0.668521	CXXC5	conserved	other
1.65243	1.31019	PSD2	monkey	other
0.789907	0.448353	PRSS55	conserved	other
0.515287	1.90017	MGLL	conserved	other
1.07269	0.767899	DIXDC1	conserved	other
0.507014	0.453284	PHF8	conserved	other
0.430277	1.66946	ATXN10	conserved	other
0.878757	0.533649	CLVS2	conserved	other
1.45248	0.947562	ADCY8	conserved	other
0.805534	0.794758	DZIP1	conserved	other
-0.679635	0.456094	EXOSC5	conserved	other
-0.653197	0.491856	WNT7B	conserved	other
0.351836	0.47384	SLC30A5	conserved	other
0.219999	0.553299	PRPF8	conserved	other
0.987526	0.652245	PPARA	conserved	other
0.959182	0.707156	RIC1	conserved	other
0.452686	0.401916	PI4KB	conserved	other
-0.127457	0.487707	TDP2	conserved	other
2.24505	1.69753	HERC4	monkey	other
-1.17118	0.70131	BTBD1	conserved	other
1.43909	0.948651	NRG2	conserved	other
0.22191	0.997895	CD47	conserved	other
-0.472299	0.339754	B9D2	conserved	other
0.145197	0.616632	DNAJC3	conserved	other
0.675296	0.690077	CACUL1	conserved	other
0.484332	0.593653	RMND5A	conserved	other
-0.691931	0.387056	CYSTM1	conserved	other
0.208738	0.55099	IFT81	conserved	other
0.685781	0.387393	KIF13B	conserved	other
-1.58691	2.45382	CNN3	mouse	other
0.0295762	0.677986	ADGRB2	conserved	other
-0.908025	1.31782	PFDN1	conserved	other
0.124494	0.492225	RNF103	conserved	other
-0.272207	0.262433	FSD1	conserved	other
-0.340917	0.537483	CRYAB	conserved	other
-0.147136	1.00981	EIF3A	conserved	other
1.33708	1.03664	GNPTAB	conserved	other
2.83123	2.30573	SMYD3	monkey	other
0.572062	0.481658	UGGT2	conserved	other
0.434932	0.395265	CASKIN2	conserved	other
2.05172	1.89882	NFAT5	monkey	other
-0.127504	0.274944	AIMP2	conserved	other
0.705511	0.49939	CNST	conserved	other
1.02956	1.45439	PIK3R1	conserved	other
-0.871828	1.24442	YWHAH	conserved	other
0.631624	0.676867	ATP11B	conserved	other
1.15599	1.64648	MBNL2	conserved	other
1.25117	0.757168	OTUD7A	conserved	other
-0.0743968	0.432855	ALDH5A1	conserved	other
0.576836	0.683645	LTBP3	conserved	other
0.959843	0.65354	TPK1	conserved	other
-0.338679	0.274481	RRP9	conserved	other
0.185797	0.814322	PDLIM3	conserved	other
-0.948	0.715244	PODXL2	conserved	other
0.526864	0.435128	SIRT1	conserved	other
0.879113	0.536349	LRFN5	conserved	other
-0.852548	0.906375	PSMD4	conserved	other
-0.239454	0.246635	NOB1	conserved	other
0.70375	0.783875	HMBOX1	conserved	other
0.967257	1.1368	KIDINS220	conserved	other
2.20373	2.56504	CNTNAP2	monkey	other
-1.30112	1.04333	RWDD1	conserved	other
-0.45219	0.340722	BRIX1	conserved	other
0.601629	0.560784	MORC3	conserved	other
0.239412	0.430753	TRMU	conserved	other
0.622276	0.518507	SFXN4	conserved	other
1.057	1.25733	EFR3A	conserved	other
-0.239313	0.546378	PRDX3	conserved	other
2.05381	1.39411	CTNNA3	monkey	macaque_enriched
-0.0698377	0.515084	UFSP2	conserved	other
-0.054511	0.631464	SCCPDH	conserved	other
0.918175	0.559851	GRK5	conserved	other
0.951503	1.18727	BBX	conserved	other
1.38804	0.874138	LRRTM3	conserved	other
-0.200213	0.57631	BRD9	conserved	other
1.4216	1.67212	CHPT1	conserved	other
-0.931458	0.539631	UHRF2	conserved	other
0.549207	0.610517	SMG7	conserved	other
0.377407	0.421837	PKN1	conserved	other
0.169232	1.02213	ABCD3	conserved	other
-1.40228	1.58141	ID2	conserved	other
0.784309	0.547155	INTS9	conserved	other
0.281738	1.27919	THOC2	conserved	other
-0.707311	0.396575	SLC35A4	conserved	other
-0.293402	0.755174	HNRNPUL1	conserved	other
-4.31573	3.4285	RPL19	mouse	other
0.457503	0.468812	EXTL3	conserved	other
0.583889	0.415883	KLHL28	conserved	other
0.624677	0.645934	FZD3	conserved	other
-3	2.16993	NDUFA2	mouse	other
-0.199649	0.551012	IPO5	conserved	other
1.80989	1.64436	NEDD4L	monkey	other
0.695521	1.02333	RNF144A	conserved	other
-0.073339	0.765035	PITPNA	conserved	other
0.374412	0.700948	XIAP	conserved	other
0.321533	2.5856	GRIA2	conserved	other
-0.131626	0.651048	GNPDA2	conserved	other
-0.212249	1.48236	REEP3	conserved	other
1.62152	1.02751	TTC23L	monkey	other
2.78477	2.04007	KIRREL3	monkey	other
0.364934	0.360771	COL5A2	conserved	other
-0.454437	0.389204	CELSR1	conserved	other
0.828221	0.624413	PCID2	conserved	other
1.40601	1.13565	SH3GL3	conserved	other
-0.240738	0.876708	GLDC	conserved	other
0.47362	0.417177	WWP2	conserved	other
1.03559	1.66694	AKAP9	conserved	other
2.96562	2.54653	FARP1	monkey	other
-0.685615	0.383158	WDFY1	conserved	other
1.48949	1.00441	HLCS	conserved	other
5.18768	4.33059	PRKG1	monkey	other
1.97134	1.33118	RAI14	monkey	other
0.753037	0.433973	ADAMTSL3	conserved	other
1.82091	1.19652	MYBPC1	monkey	other
0.575518	0.466587	STK24	conserved	other
-1.07486	0.838916	PIGP	conserved	other
1.04425	0.898284	MCCC1	conserved	other
-0.925252	0.968459	PSMD7	conserved	other
0.753755	0.79645	CUL4A	conserved	other
-2.5154	1.74794	COX7A2	mouse	other
0.170523	0.429728	ELP3	conserved	other
1.61618	1.15006	GABRG1	monkey	other
0.424763	0.466652	GLRB	conserved	other
-0.563579	0.759643	TMEM30A	conserved	other
0.527995	0.550844	CBLB	conserved	other
0.63795	0.448689	ZFHX3	conserved	other
-0.288093	0.498408	PEX13	conserved	other
1.63808	1.252	FBXL20	monkey	other
0.102324	0.745261	AXL	conserved	other
-2.04612	1.71854	LAMP1	mouse	other
1.00425	0.893434	USP33	conserved	other
0.130464	1.21774	SERPINE2	conserved	other
0.518047	0.412643	CERK	conserved	other
0.776193	0.483359	NMNAT2	conserved	other
0.193927	0.693762	STAG2	conserved	other
2.26953	2.0118	GABRA2	monkey	other
0.520745	0.481533	SGMS1	conserved	other
-1.02309	0.714152	ARL1	conserved	other
-0.387027	0.538314	GABRA4	conserved	other
-0.593967	0.60579	ST3GAL4	conserved	other
0.401372	0.477643	KDM3A	conserved	other
1.58652	1.14023	TBC1D22A	monkey	other
-0.839276	0.594598	NINJ1	conserved	other
1.77084	1.53541	AHCTF1	monkey	other
2.47459	2.44544	JMJD1C	monkey	other
0.546048	0.427871	P2RX7	conserved	other
-0.126035	1.16151	RTF1	conserved	other
0.599687	0.743381	SCARA3	conserved	other
1.77107	1.42415	KCNQ3	monkey	other
0.338763	2.69403	CLU	conserved	other
0.491878	1.49916	ALCAM	conserved	other
-0.235333	0.298699	DCPS	conserved	other
-0.830336	0.83915	COPS5	conserved	other
1.05258	0.744679	PUS10	conserved	other
-0.715753	0.401816	ATAD1	conserved	other
-0.168995	0.270656	GRTP1	conserved	other
-0.413377	0.283226	SURF2	conserved	other
-0.654479	0.871111	HDAC2	conserved	other
3.56455	2.83973	NRXN3	monkey	other
-0.0268803	0.45381	CMAS	conserved	other
0.656635	0.511821	EPHX2	conserved	other
1.7458	1.19116	PDGFC	monkey	other
0.830123	0.538652	SNX25	conserved	other
0.0685825	0.573893	SURF4	conserved	other
-0.906814	0.650492	MPND	conserved	other
0.823918	0.480382	TOX	conserved	other
-0.137896	0.389022	EXOC3	conserved	other
-0.534418	0.29404	ADO	conserved	other
-0.370411	0.411103	MRPL35	conserved	other
0.54762	0.477176	BRD1	conserved	other
-0.325573	0.369282	CTSO	conserved	other
0.63485	0.504166	ST8SIA1	conserved	other
0.76172	0.566552	RNLS	conserved	other
-0.150264	0.976086	CUL1	conserved	other
0.402464	0.375357	UTP20	conserved	other
2.23539	1.65587	FAM171A1	monkey	other
0.770759	1.09804	CUL3	conserved	other
-1.48417	0.977516	MANF	conserved	other
0.752294	0.470405	PTK2B	conserved	other
0.786627	0.666012	PPP2R1B	conserved	other
0.344812	0.468843	LAMC1	conserved	other
0.972871	0.642281	FANCM	conserved	other
0.474305	0.352979	ALG12	conserved	other
-2.3858	2.35474	SUB1	mouse	other
0.747069	1.4538	HUWE1	conserved	other
-0.139958	0.296161	CRELD2	conserved	other
0.70137	0.740387	PEX14	conserved	other
2.552	2.183	MAST4	monkey	other
0.0281208	0.575618	MED1	conserved	other
1.75599	1.36195	CDK14	monkey	other
-0.105101	0.421187	SH3GL1	conserved	other
0.528861	0.939528	PHF20L1	conserved	other
-2.48856	2.04423	SLC25A4	mouse	other
-0.750691	0.423631	FAM229B	conserved	other
1.19812	0.864701	DCUN1D2	conserved	other
0.652172	0.546318	TRAPPC12	conserved	other
0.0170488	0.389343	REXO4	conserved	other
-0.400846	0.644188	UBXN6	conserved	other
2.75131	2.16432	MAPK10	monkey	other
0.719318	0.950388	DHX9	conserved	other
-0.262205	0.700251	NMT2	conserved	other
-1.2941	0.787534	BRD2	conserved	other
-1.03383	0.640108	CCND1	conserved	other
0.924431	1.46461	ZFR	conserved	other
0.59693	0.355038	MIS18BP1	conserved	other
0.632971	0.420093	NPL	conserved	other
1.5661	1.18625	ARID5B	monkey	other
1.01287	0.648413	CACNA1D	conserved	other
-0.270119	1.85016	MLC1	conserved	other
0.840985	0.945408	SLC39A10	conserved	other
-0.190152	0.382191	PPP2R5B	conserved	other
0.375646	0.376827	FOXRED1	conserved	other
0.588444	0.62933	TMCO3	conserved	other
0.83574	0.53201	GRIP1	conserved	other
0.75485	0.528508	MTMR12	conserved	other
0.157484	0.510904	PANK1	conserved	other
1.41228	1.89308	CSPP1	conserved	other
1.64275	1.15457	SIK2	monkey	other
-0.112507	0.466759	PGD	conserved	other
0.644304	0.655362	ABCA3	conserved	other
0.410228	0.383371	FKBP15	conserved	other
-0.180799	0.30944	EHD1	conserved	other
3.00826	2.38395	DOCK3	monkey	other
-0.710131	0.486117	COMMD8	conserved	other
-0.491845	0.266782	ZZZ3	conserved	other
0.161528	0.715546	GOLPH3	conserved	other
2.28635	1.72768	MDGA2	monkey	other
-0.500816	0.397925	CCDC127	conserved	other
2.20525	1.56854	STON2	monkey	other
-1.05436	1.28561	CTBP1	conserved	other
-0.623092	0.410934	GAS6	conserved	other
-0.179112	0.516597	SLC31A1	conserved	other
0.941792	0.711955	PDZD2	conserved	other
1.82844	1.37079	TMEFF2	monkey	other
-0.687331	0.384217	BCL11A	conserved	other
-0.789083	0.447831	MGAT2	conserved	other
-1.46193	1.00448	CDC26	conserved	other
-0.163338	0.423138	RPP30	conserved	other
0.0508628	0.384117	TRABD	conserved	other
-0.313044	0.451594	IK	conserved	other
1.03643	1.13571	ARFGEF1	conserved	other
-0.423881	0.227452	MEN1	conserved	other
0.309793	0.359898	GTPBP10	conserved	other
1.50395	0.986446	AK5	monkey	other
-0.889636	0.594242	EZH2	conserved	other
-1.22869	0.741378	GUK1	conserved	other
-0.4271	0.514214	GCLM	conserved	other
-0.870236	0.73631	MYDGF	conserved	other
0.64966	0.47747	ARHGAP20	conserved	other
0.0769354	0.401895	MAEA	conserved	other
0.620303	0.78146	SAP30BP	conserved	other
1.34222	0.873493	DOCK10	conserved	other
-0.268421	0.722479	ECI1	conserved	other
0.326436	0.627983	CDON	conserved	other
0.0354389	0.558138	LRP8	conserved	other
0.508128	0.520126	MED15	conserved	other
-0.80739	0.459454	FDX1	conserved	other
0.196906	0.419428	MAP9	conserved	other
0.544178	0.916841	CDK12	conserved	other
1.85577	1.51363	CDKAL1	monkey	other
-1.02571	0.786095	ZMAT2	conserved	other
0.853455	0.512931	MALT1	conserved	other
0.796037	0.843344	PCGF5	conserved	other
-0.358593	0.391291	PLIN3	conserved	other
0.734086	0.700558	DROSHA	conserved	other
-0.182471	0.53747	RBCK1	conserved	other
0.257643	0.471486	P2RX4	conserved	other
-0.299122	1.31479	RDX	conserved	other
0.666624	0.393109	TENM1	conserved	other
0.335031	0.370057	FANCL	conserved	other
1.01784	0.911395	BCAR3	conserved	other
0.642167	0.530345	E2F3	conserved	other
-0.532265	0.50762	PDIA4	conserved	other
0.998023	0.61538	ZC3H12C	conserved	other
-0.0566527	0.823017	CHCHD6	conserved	other
0.312174	0.618399	LPCAT3	conserved	other
0.405735	0.386034	HDAC10	conserved	other
0.501574	0.489453	DDX10	conserved	other
0.622241	0.395445	SCARF2	conserved	other
-1.48544	1.01	EMG1	conserved	other
-0.875764	0.567146	MRPL21	conserved	other
0.274196	0.405028	PIGK	conserved	other
0.790393	0.679313	KLHDC1	conserved	other
-1.40936	0.91507	HSD17B10	conserved	other
-0.327668	0.256877	ZCCHC3	conserved	other
-0.347666	0.365625	SNAP47	conserved	other
0.133228	0.568416	ATXN2L	conserved	other
0.258664	0.620411	CPT1A	conserved	other
1.12448	1.14173	SENP7	conserved	other
-0.0493354	0.757474	IMMT	conserved	other
0.460467	0.392425	VRK2	conserved	other
-0.469247	1.03603	KLHDC2	conserved	other
0.964408	0.970397	HECTD2	conserved	other
2.44943	2.77292	ST6GALNAC5	monkey	other
-0.877124	0.551206	TSPAN6	conserved	other
0.788343	0.69408	ATM	conserved	other
1.59838	1.23488	ST6GALNAC3	monkey	other
-0.697216	0.546015	TRIM35	conserved	other
-1.14287	0.68176	PGP	conserved	other
-0.119102	0.394538	SMC1A	conserved	other
-0.559283	0.306575	UVSSA	conserved	other
-0.255474	0.44225	RASA3	conserved	other
-0.171932	0.486762	STMN4	conserved	other
0.702345	0.42181	PRIMPOL	conserved	other
0.997071	0.701215	DOCK9	conserved	other
1.77007	1.31215	CCDC85A	monkey	other
1.44039	1.60653	MYO6	conserved	other
0.711643	0.54861	IQSEC2	conserved	other
0.0491602	0.67414	SEL1L	conserved	other
1.65859	1.10608	AFF1	monkey	other
1.57564	0.997423	CDH9	monkey	other
0.605826	0.886947	PPP1R3C	conserved	other
0.766283	1.18769	SPIN1	conserved	other
-0.325536	2.05709	GLUL	conserved	other
1.20408	1.17387	FNBP1L	conserved	other
-0.165942	0.676767	PRKACA	conserved	other
2.4466	3.28068	PREX2	monkey	other
-0.536326	0.54595	NAA10	conserved	other
1.83869	1.48178	CDH10	monkey	other
0.132033	0.849378	TNKS2	conserved	other
-0.399674	1.06174	ZCCHC17	conserved	other
-0.232634	0.383762	SLC25A1	conserved	other
0.0878523	0.650052	CDC16	conserved	other
0.544947	0.316444	ZFAT	conserved	other
-0.31264	0.607275	SNRNP40	conserved	other
0.584129	0.484447	RHBDD1	conserved	other
0.803011	0.456669	IRAK3	conserved	other
-0.345107	0.357253	FAM53A	conserved	other
0.487774	0.647717	UPF3A	conserved	other
1.47402	0.930694	PCDHAC2	conserved	other
-0.316539	0.286306	ALAD	conserved	other
0.55918	0.511056	SMARCA1	conserved	other
-0.250093	0.440188	PLXNB2	conserved	other
0.671451	0.636183	KLHL8	conserved	other
-0.474453	0.45019	COPRS	conserved	other
-0.157214	0.457036	SEC11C	conserved	other
0.772139	0.515546	PDE5A	conserved	other
0.759843	0.711753	IRF2	conserved	other
0.840033	1.04382	NEMF	conserved	other
0.904642	2.57358	KIF1B	conserved	other
0.413605	0.377634	PTCD3	conserved	other
1.70375	1.14759	CACNA1E	monkey	other
0.459206	0.612635	AP1G1	conserved	other
1.57754	1.00047	CDH12	monkey	other
0.589092	0.445503	DENND6B	conserved	other
-0.827544	0.623075	SLBP	conserved	other
0.935611	0.725528	KCNH7	conserved	other
1.00044	0.743409	FLRT2	conserved	other
-0.614473	0.429757	ARF6	conserved	other
0.895744	0.946256	KHDRBS3	conserved	other
0.697024	0.391552	FIGN	conserved	other
2.1596	1.49296	EFEMP1	monkey	other
0.581057	0.39477	CFAP69	conserved	other
-0.311253	0.438874	MR1	conserved	other
0.879691	0.770877	C2CD5	conserved	other
0.856669	0.71285	KDM4B	conserved	other
-1.04279	0.686481	LLPH	conserved	other
0.0232581	0.808626	CRK	conserved	other
1.64895	2.04936	FYN	monkey	other
0.810707	0.490017	CDH18	conserved	other
-0.0870559	0.435767	OCRL	conserved	other
1.07285	0.882427	BTAF1	conserved	other
-0.193451	0.333508	LMAN1	conserved	other
1.41686	1.02553	EXOC2	conserved	other
1.10586	1.04961	PPP6R3	conserved	other
1.03001	0.60504	FAM135B	conserved	other
-1.52842	0.9578	MIEN1	mouse	other
0.531228	0.521579	PHLPP2	conserved	other
-0.137198	0.394684	HSPA14	conserved	other
1.31905	0.854986	PPP6R2	conserved	other
0.386099	0.465874	GALC	conserved	other
0.334815	0.402141	ERICH1	conserved	other
0.741277	0.421131	CCBE1	conserved	other
0.847693	0.647974	NLN	conserved	other
-0.311872	0.98659	STX6	conserved	other
0.256719	1.21116	STOX2	conserved	other
1.1365	0.9215	SOS2	conserved	other
1.32584	0.83409	ADRA1A	conserved	other
1.16124	1.44321	CUL5	conserved	other
1.64849	1.17967	GMDS	monkey	other
1.02431	0.693771	DCP1A	conserved	other
0.42101	0.37015	PNPT1	conserved	other
1.21481	0.818285	VAV2	conserved	other
0.566224	0.591039	USP53	conserved	other
1.00332	0.587179	TRAF3IP2	conserved	other
-1.76793	1.13936	MFF	mouse	other
0.261869	1.06238	SF1	conserved	other
-0.424047	2.25735	DPYSL2	conserved	other
0.258841	0.865683	UBAC2	conserved	other
-0.122554	0.404397	STT3A	conserved	other
-0.175995	0.536861	NUDT9	conserved	other
1.12268	0.943897	MTMR10	conserved	other
-0.734358	0.980098	TKT	conserved	other
-0.0886137	0.671711	ETNK1	conserved	other
1.43802	0.902575	MSRB3	conserved	other
-1.45024	1.37784	BNIP3L	conserved	other
1.186	0.746649	SYNPO2	conserved	other
0.411516	0.343098	TRAPPC11	conserved	other
0.0515746	0.996536	PPP2R2A	conserved	other
-0.116465	0.665363	TFG	conserved	other
1.19481	1.60309	XPR1	conserved	other
0.106591	0.668772	TM9SF2	conserved	other
0.4649	0.428434	LEMD3	conserved	other
-0.522797	0.400657	CSTF2	conserved	other
0.219237	0.537979	IRAK1BP1	conserved	other
1.39481	3.58814	SPARCL1	conserved	other
0.966084	0.664008	ELMOD1	conserved	other
0.563961	0.855016	ST3GAL5	conserved	other
2.02646	1.44945	TRAPPC9	monkey	other
0.1732	0.6277	TRAPPC13	conserved	other
1.21549	1.24586	CLYBL	conserved	other
0.544615	0.302318	PYGM	conserved	other
-0.528965	0.403572	NIT2	conserved	other
2.64664	2.2862	REV3L	monkey	other
-0.933355	0.745066	ZIC5	conserved	other
0.646771	0.404023	FAN1	conserved	other
0.974617	0.822126	TBC1D23	conserved	other
0.970206	0.583285	EXOC6	conserved	other
1.25674	1.98699	PHIP	conserved	other
-0.633742	0.389406	ORMDL3	conserved	other
-0.518815	0.751784	CFAP36	conserved	other
2.2923	1.60975	WIF1	monkey	other
1.79185	1.79413	PCCA	monkey	other
1.01415	0.684145	CMSS1	conserved	other
-1.23695	1.03466	EI24	conserved	other
-0.314088	0.559536	PSMD3	conserved	other
-0.667035	0.986062	SRI	conserved	other
0.977332	1.44492	APBA2	conserved	other
-0.279174	0.40208	LZIC	conserved	other
3.71099	2.82134	FBXL7	monkey	macaque_enriched
1.13409	2.20957	CCDC88A	conserved	other
-0.7437	0.507107	CHRAC1	conserved	other
0.345277	0.463675	TRIM23	conserved	other
0.517125	0.787488	AGO2	conserved	other
0.284549	0.473361	GNS	conserved	other
0.924522	0.683767	WWC2	conserved	other
-0.258551	0.274268	HCFC1	conserved	other
-1.69587	2.10726	FEZ1	mouse	other
0.443958	0.384351	PPWD1	conserved	other
0.768508	0.456782	FAM189A1	conserved	other
0.728557	0.603143	VAC14	conserved	other
0.705682	0.543125	ZXDC	conserved	other
-1.43649	0.991422	ID1	conserved	other
-1.53303	2.11098	HMGN3	mouse	other
0.506181	0.286218	CAST	conserved	other
-0.669831	0.373446	SPIRE1	conserved	other
0.187601	0.601785	BCL2L1	conserved	other
-0.142315	0.507811	TRAF7	conserved	other
0.552007	1.55213	PUM1	conserved	other
2.39246	1.65581	ITGB4	monkey	macaque_enriched
1.09237	0.647196	DOCK5	conserved	other
2.10624	1.71652	PHACTR3	monkey	other
-0.0237958	0.442809	XPOT	conserved	other
3.17408	2.81262	CDC42BPA	monkey	other
1.36749	1.1414	DMXL2	conserved	other
-0.227239	0.775349	ACADM	conserved	other
-0.377566	0.201099	RPF2	conserved	other
0.560903	0.496058	TMTC4	conserved	other
-0.195852	0.450658	DLD	conserved	other
0.863219	0.671478	ARHGEF10	conserved	other
2.16125	1.50182	SLC44A5	monkey	macaque_enriched
1.26362	1.04435	MAP4K5	conserved	other
-0.617748	0.341689	GTF3C6	conserved	other
0.462599	0.681929	KLF15	conserved	other
-0.755876	0.83951	HDAC3	conserved	other
0.495914	0.300855	SH3BGRL2	conserved	other
1.44758	0.951422	PKNOX2	conserved	other
1.07876	0.684689	SRGAP1	conserved	other
-1.21358	0.730806	MAGEH1	conserved	other
-0.777921	1.31908	NRXN2	conserved	other
2.81613	2.70512	SOX5	monkey	other
0.44634	0.317249	RRAGB	conserved	other
1.11323	0.93192	CDK19	conserved	other
0.421955	0.555713	SF3B3	conserved	other
-1.22134	0.736228	CLSTN1	conserved	other
-0.315552	0.283755	CIB2	conserved	other
-0.424188	0.304743	TMEM218	conserved	other
0.561609	0.317222	NDST3	conserved	other
0.138063	0.538541	SDC3	conserved	other
1.23628	0.86006	PPM1H	conserved	other
2.06683	1.51403	ARNT2	monkey	other
-1.15581	1.94341	SCP2	conserved	other
-0.879223	0.623241	RNF5	conserved	other
0.555736	0.444036	ATL1	conserved	other
-0.569157	0.458083	CERS2	conserved	other
0.784953	0.762706	CDC40	conserved	other
0.404364	0.889293	SAFB2	conserved	other
2.08073	1.39992	LDLRAD4	monkey	other
0.614069	0.339462	MYOM2	conserved	other
1.34218	1.21465	AUH	conserved	other
0.467069	0.670007	WASF1	conserved	other
0.129041	0.43966	MTIF2	conserved	other
1.34989	1.95196	ACSBG1	conserved	other
0.347271	0.351779	FIG4	conserved	other
-0.37156	0.468271	NCAPH2	conserved	other
0.76794	0.939734	RNMT	conserved	other
0.951538	0.552836	CDH26	conserved	other
1.10734	1.06866	ALDH1L1	conserved	other
-0.20483	0.304658	AGPAT1	conserved	other
0.434626	0.401625	COG4	conserved	other
1.8792	1.27446	NALCN	monkey	other
0.935446	0.941857	TRRAP	conserved	other
0.828846	0.815081	BCKDHB	conserved	other
2.06867	2.0808	TJP1	monkey	other
-0.206732	0.746846	BRD3	conserved	other
0.0485955	0.75424	ZC3H14	conserved	other
0.649877	1.26426	ACBD6	conserved	other
-0.494914	0.306167	GALK1	conserved	other
0.191668	0.42475	SPTLC1	conserved	other
3.18334	2.36065	FGF14	monkey	other
-0.148395	0.362918	USP5	conserved	other
-0.996314	1.23996	THRA	conserved	other
-0.017686	0.393715	SGF29	conserved	other
-0.402588	0.325292	RBP4	conserved	other
-0.813838	0.523781	PRDX4	conserved	other
0.280625	1.96977	SFXN1	conserved	other
-0.147925	0.485328	ECHDC2	conserved	other
0.840644	0.49343	ARSJ	conserved	other
2.56932	3.08816	CDH4	monkey	other
-0.478634	0.484198	RNF14	conserved	other
0.169829	0.463333	RANBP3	conserved	other
1.10233	0.925343	VPS53	conserved	other
1.6509	1.2574	RHOBTB3	monkey	other
1.55089	1.57865	LGI1	monkey	other
0.78397	0.60069	SLC25A37	conserved	other
-0.422591	0.359624	THOC3	conserved	other
1.35014	1.25445	CACNA1A	conserved	other
1.27461	1.03803	CWC27	conserved	other
1.52841	1.03789	RFX2	monkey	other
0.186363	0.399082	WDR5	conserved	other
-0.749093	0.762276	SREK1IP1	conserved	other
2.58576	2.25562	PLCE1	monkey	other
2.56861	2.22694	PTK2	monkey	other
2.09205	1.43182	COG5	monkey	other
0.501942	0.397043	DCBLD2	conserved	other
1.39477	1.12489	MON2	conserved	other
0.649993	0.481563	SIMC1	conserved	other
-0.44215	0.545425	TM2D3	conserved	other
1.14586	0.898516	NDFIP1	conserved	other
-0.34958	0.278594	GPX7	conserved	other
0.760784	0.509488	SCN3A	conserved	other
1.20624	1.12633	DYRK1A	conserved	other
0.308932	0.407309	LRRC8C	conserved	other
-0.705406	0.395394	SMS	conserved	other
-0.345197	0.182899	LRRC8D	conserved	other
0.565295	0.903749	IQSEC1	conserved	other
-0.261244	1.3637	ZFAND6	conserved	other
0.623638	0.447326	PTPRJ	conserved	other
0.952584	0.940405	EML5	conserved	other
3.47353	2.80539	ARHGAP26	monkey	other
1.0198	0.760282	SMURF1	conserved	other
1.46162	1.03358	CEP350	conserved	other
-0.341981	0.257779	HELLS	conserved	other
0.829002	0.550533	RNF180	conserved	other
0.290892	0.545235	TTC8	conserved	other
1.20103	0.733154	KCNJ6	conserved	other
-1.91308	1.64768	PSMA7	mouse	other
0.437762	1.23199	NR3C1	conserved	other
-1.02639	0.849577	CLDND1	conserved	other
1.08626	0.686714	MCPH1	conserved	other
0.630829	0.579712	UNK	conserved	other
0.593931	0.524333	ESYT2	conserved	other
-0.610892	0.579243	YIPF5	conserved	other
0.921923	1.04182	FRYL	conserved	other
2.6678	1.87865	KCTD16	monkey	other
0.370966	0.438252	MLLT1	conserved	other
0.586665	0.362212	ANGPT2	conserved	other
0.324847	0.383097	SS18L1	conserved	other
-0.389481	0.322519	CHMP7	conserved	other
-1.13177	0.674133	CLPP	conserved	other
-0.356195	0.283883	NACC1	conserved	other
0.363678	0.608674	MTG2	conserved	other
-0.410259	0.295175	ALKBH7	conserved	other
0.783366	1.07519	AGPAT5	conserved	other
0.157193	0.749264	MSL1	conserved	other
0.0869098	0.515915	ATF6B	conserved	other
0.149597	0.717935	HBP1	conserved	other
0.591231	0.697907	AGFG1	conserved	other
-1.71248	1.09668	HIGD2A	mouse	other
0.0561337	0.475186	CASC3	conserved	other
4.15669	4.26625	CTNND2	monkey	other
-0.0751214	0.701042	BPHL	conserved	other
-2.87666	2.69189	COX8A	mouse	other
1.48609	1.1864	WIPF2	conserved	other
-0.609355	0.771888	CLTB	conserved	other
-0.239667	0.294704	GLOD4	conserved	other
-0.666426	0.556326	SLC25A23	conserved	other
0.721291	0.441492	WDR17	conserved	other
1.406	0.928626	TTC37	conserved	other
2.39446	2.19513	FOXN3	monkey	other
-0.774128	0.723442	WDR61	conserved	other
0.19397	0.624795	PCSK6	conserved	other
0.661551	0.88179	TCERG1	conserved	other
1.46697	0.975815	SLC25A13	conserved	other
-2.11142	2.60326	TUBB2B	mouse	other
0.513289	0.525583	SETDB1	conserved	other
1.10925	0.729643	PPP3CC	conserved	other
0.525124	1.26118	FGFR3	conserved	other
-0.906689	1.05032	PSMG4	conserved	other
0.937456	0.785609	IPO11	conserved	other
3.86369	3.17552	SORBS1	monkey	other
1.25075	2.01038	RTN4	conserved	other
0.561294	0.491701	PRKAR2B	conserved	other
0.592226	0.348341	CCDC15	conserved	other
-0.415849	0.757192	NAPA	conserved	other
0.592248	0.917234	SRSF4	conserved	other
3.02317	5.30261	GPM6A	monkey	other
1.83567	1.71714	CLASP1	monkey	other
-0.636644	0.43642	PRPF38A	conserved	other
2.27191	1.84904	SLC22A23	monkey	other
1.15604	0.850262	USP15	conserved	other
-0.374505	0.471473	MAPK3	conserved	other
-0.439454	0.236395	TMEM115	conserved	other
-1.07824	0.637589	HNRNPH2	conserved	other
0.311125	0.555319	IREB2	conserved	other
2.04629	1.47299	MCTP1	monkey	macaque_enriched
3.16732	3.44048	PPP2R2B	monkey	other
-1.73022	1.4598	MLF2	mouse	other
2.05741	1.40786	CNKSR2	monkey	other
-1.35624	0.831943	HEPACAM	conserved	other
1.02843	1.2032	FBXW7	conserved	other
0.632322	0.41144	NUP160	conserved	other
0.499426	0.695153	FAF2	conserved	other
-0.667347	0.371921	MPRIP	conserved	other
0.819477	0.71326	IBTK	conserved	other
0.474919	0.321067	PDPR	conserved	other
-0.665618	0.370861	SMPD2	conserved	other
-0.987191	0.787285	DPYSL3	conserved	other
-0.857819	0.728357	PDRG1	conserved	other
-0.058829	0.446636	NAMPT	conserved	other
-0.885449	0.850339	CD164	conserved	other
-1.17294	0.706727	ITIH3	conserved	other
-1.28399	0.990489	CCT5	conserved	other
-1.077	0.661193	TPBG	conserved	other
-0.0125355	0.826584	ARL6	conserved	other
1.88188	1.41345	JAKMIP2	monkey	other
-1.74704	1.37603	PSMA4	mouse	other
0.129279	0.545467	FBXO8	conserved	other
1.82329	1.18708	RAPGEF5	monkey	other
0.844565	0.758928	FGF2	conserved	other
1.47066	1.61824	GLG1	conserved	other
-0.736637	0.414832	ARMCX3	conserved	other
-0.205409	0.443038	RASSF1	conserved	other
0.577355	0.378508	GATB	conserved	other
-0.206843	0.511354	LETM1	conserved	other
0.714387	1.05422	MGA	conserved	other
0.253278	1.14866	PRPF4B	conserved	other
-0.443255	0.350555	IRAK1	conserved	other
3.32082	2.46429	EPHA6	monkey	other
-0.462141	1.25569	ANAPC5	conserved	other
-0.779651	0.441863	TUSC2	conserved	other
1.08112	1.02468	ELMOD3	conserved	other
1.23467	0.87218	SEMA5A	conserved	other
0.488158	0.727388	MARK2	conserved	other
-0.296957	0.420713	STK19	conserved	other
2.19146	1.52062	FHIT	monkey	macaque_enriched
-0.452002	0.481024	COPS7A	conserved	other
-0.481667	0.278757	DXO	conserved	other
-0.7032	0.394027	MRPL40	conserved	other
2.7263	2.17046	MCC	monkey	other
-0.118971	0.370157	RNF44	conserved	other
-1.53145	0.982428	SCRG1	mouse	other
3.36436	2.99685	NEGR1	monkey	other
-0.961931	0.694148	SAP30	conserved	other
1.13938	1.61648	SDC2	conserved	other
1.13189	0.791809	CPQ	conserved	other
0.578776	0.531499	ARL13B	conserved	other
-0.292086	0.33397	TRMT1	conserved	other
-0.304647	0.758062	CTDSP2	conserved	other
1.92969	1.30526	COL5A1	monkey	other
1.40445	0.989855	NIN	conserved	other
1.35926	0.936207	SPATA5	conserved	other
0.701971	0.662247	HIRA	conserved	other
-0.389799	0.953417	ADGRB1	conserved	other
-2.22335	1.72586	ATP6V1G1	mouse	other
-0.357118	1.09985	KCNN2	conserved	other
0.505893	0.468221	CEP57L1	conserved	other
-0.345752	0.747205	KRAS	conserved	other
0.470878	0.743055	CHSY1	conserved	other
0.685324	0.695253	ARNT	conserved	other
1.40602	1.82218	FAM172A	conserved	other
-1.10609	1.08414	FEZF2	conserved	other
0.274501	0.528099	NXN	conserved	other
0.83037	0.534526	NEK4	conserved	other
-0.692894	1.18216	BTF3L4	conserved	other
1.47334	0.971897	EML6	conserved	other
-0.877039	0.504164	CDO1	conserved	other
-0.881426	1.47858	GDI2	conserved	other
-0.683446	0.381821	TXNDC12	conserved	other
-0.66757	0.372058	ATG12	conserved	other
1.54215	0.973288	LMNTD1	monkey	macaque_enriched
-1.53614	1.58962	AP3S1	mouse	other
0.677842	0.655488	TSC2	conserved	other
1.03568	1.01746	COMMD10	conserved	other
-0.810653	0.461531	CGGBP1	conserved	other
-0.735439	0.552588	TIMM22	conserved	other
-0.233464	0.354288	TSFM	conserved	other
1.35844	0.87014	CSRNP3	conserved	other
0.447918	0.388586	RASSF8	conserved	other
-0.195663	1.50737	MTDH	conserved	other
1.1163	1.00902	SESN1	conserved	other
-1.41499	1.90365	NR2F1	conserved	other
-0.0550012	0.808016	SEMA6A	conserved	other
0.61483	0.510361	RPS6KA3	conserved	other
-2.68676	1.89504	PARK7	mouse	other
-1.6378	1.25892	SPCS1	mouse	other
-0.635498	0.364092	METTL1	conserved	other
-0.744203	0.467804	FBLN2	conserved	other
0.850483	0.734617	SH3D19	conserved	other
-0.587119	0.47626	CHMP2B	conserved	other
0.482223	0.42058	GALNT7	conserved	other
1.50074	1.02925	ARMC2	monkey	other
-0.173294	0.526994	COPS3	conserved	other
0.738412	0.845239	KIF2A	conserved	other
0.466524	1.56262	KTN1	conserved	other
-0.440651	0.237085	ARMCX2	conserved	other
5.03776	5.04324	CADM2	monkey	other
-1.26258	2.28966	NFIX	conserved	other
0.861549	0.610484	MAPKBP1	conserved	other
0.0945844	0.67317	NT5M	conserved	other
0.660658	0.825853	MECP2	conserved	other
0.959702	1.34954	BRWD1	conserved	other
0.656197	0.502102	SSPN	conserved	other
2.03477	1.46875	TTC7B	monkey	other
-0.266446	0.61492	RNF34	conserved	other
0.229664	0.40707	ALDH18A1	conserved	other
1.5763	1.42379	FOXO3	monkey	other
0.5665	0.488616	FAT4	conserved	other
-1.30376	0.8369	BUD31	conserved	other
-2.08297	1.58807	CDK4	mouse	other
1.95844	1.53861	ATXN7L1	monkey	other
0.655089	0.492412	DTWD2	conserved	other
1.28914	0.812208	GALNTL6	conserved	other
-0.816595	0.598686	TSPAN31	conserved	other
-0.166586	1.15703	OCIAD1	conserved	other
1.60987	1.32618	DMXL1	monkey	other
0.622969	0.353305	MATN2	conserved	other
-0.669969	0.37353	SEPHS1	conserved	other
-0.743665	0.554683	GADD45GIP1	conserved	other
0.47844	2.19766	TNC	conserved	other
0.322301	0.865667	CDK17	conserved	other
0.30686	0.583544	KCMF1	conserved	other
-0.0112014	0.403979	RAD23A	conserved	other
0.0535953	2.04264	RTN3	conserved	other
-1.60242	1.72775	SNX3	mouse	other
0.446007	0.816451	HSD17B4	conserved	other
-0.790806	0.782961	PPP4C	conserved	other
-0.461306	0.77545	NR2E1	conserved	other
-0.279125	0.989548	ETFA	conserved	other
0.534355	0.949192	MFAP3L	conserved	other
1.00077	0.913711	ME1	conserved	other
-3.57453	2.70343	RPS21	mouse	other
0.823146	1.08394	NDUFAF2	conserved	other
-0.0680703	0.373486	PHYH	conserved	other
1.73516	1.12082	PRR16	monkey	macaque_enriched
0.232367	0.779617	OLFM1	conserved	other
0.703079	0.643009	ZMAT1	conserved	other
-0.594506	0.452459	MED9	conserved	other
1.0445	0.709984	WDR59	conserved	other
0.393024	0.406321	SP4	conserved	other
0.384654	0.374402	XPC	conserved	other
0.69166	0.649256	GBE1	conserved	other
-0.504885	0.819929	WBP2	conserved	other
0.113757	0.45854	OS9	conserved	other
0.308471	1.10341	ITGB8	conserved	other
-0.0629089	0.49302	SNCAIP	conserved	other
0.849722	0.913359	ANKRD13C	conserved	other
2.32741	1.90616	SCAPER	monkey	other
1.35334	0.952817	RPS6KA5	conserved	other
0.693065	1.00754	SEC63	conserved	other
2.62606	1.97291	ROBO1	monkey	other
0.828102	0.47952	TGFBR3	conserved	other
0.548489	0.731916	TM9SF4	conserved	other
2.97171	2.17692	ASTN2	monkey	other
-0.184626	0.440012	FARSA	conserved	other
0.367127	0.386223	ERCC8	conserved	other
-0.535974	0.292735	ENSA	conserved	other
0.221595	0.644131	SNX2	conserved	other
-0.554048	0.366475	MCL1	conserved	other
0.668494	0.7881	YEATS2	conserved	other
0.535222	0.549394	RAI1	conserved	other
-0.263963	0.430612	LRFN4	conserved	other
-0.290686	0.568846	ING4	conserved	other
-0.25951	0.624164	TOR1AIP1	conserved	other
0.945284	0.64914	TTC21B	conserved	other
-0.613411	0.413498	TRIM32	conserved	other
-0.978355	0.741553	KRT10	conserved	other
-0.0569989	0.740973	HSPA4L	conserved	other
1.71811	1.22485	BRINP1	monkey	other
-0.626935	0.347258	NELFE	conserved	other
-0.0762023	3.90283	TCF4	conserved	other
-1.11812	0.664774	CAMTA1	conserved	other
-1.49046	1.48046	RCN2	conserved	other
-0.484591	0.586023	TBRG1	conserved	other
0.693565	0.415395	DNAH6	conserved	other
0.0209286	0.685753	VPS36	conserved	other
0.40171	0.360136	ATL3	conserved	other
1.03799	0.680632	SEMA3B	conserved	other
2.44646	2.73292	TRIM9	monkey	other
1.87723	1.31264	FOLH1	monkey	other
2.24581	2.57727	SPTBN1	monkey	other
0.960699	0.568041	THSD1	conserved	other
1.7434	1.53413	SOBP	monkey	other
0.366991	0.557254	ZNRF1	conserved	other
1.10346	0.858963	PDSS2	conserved	other
1.61055	1.25523	CDK5RAP2	monkey	other
1.28884	0.832795	SPHKAP	conserved	other
0.806521	0.619964	DCUN1D4	conserved	other
0.487706	0.620393	POFUT1	conserved	other
0.832991	0.698065	ABCD2	conserved	other
-0.894167	1.37318	SRSF11	conserved	other
1.17412	0.964105	ITPKB	conserved	other
-0.048843	0.608203	PARL	conserved	other
1.25811	1.0912	PID1	conserved	other
-0.58899	0.352368	GFER	conserved	other
1.17896	0.865192	SLC2A13	conserved	other
-0.528848	0.565912	TOR1AIP2	conserved	other
1.15248	1.43795	PER3	conserved	other
-0.607974	0.939133	SUCLG1	conserved	other
-0.4249	0.647729	TMX1	conserved	other
-0.62837	0.444888	ARFIP2	conserved	other
0.923653	0.797717	GLI2	conserved	other
-0.300195	0.270374	MRGBP	conserved	other
0.808655	0.880909	MEGF9	conserved	other
1.50817	1.0592	HDAC9	monkey	other
-0.660664	0.584572	VAMP3	conserved	other
1.02709	0.873944	ASXL1	conserved	other
0.756294	0.620876	EPB41	conserved	other
-0.445588	0.422582	OGFR	conserved	other
0.538361	0.513379	DNER	conserved	other
-0.684032	0.382182	ACYP2	conserved	other
0.259961	1.29693	CFDP1	conserved	other
0.650989	0.830018	ABCC5	conserved	other
-2.06068	2.00323	GNAI2	mouse	other
-0.612456	0.427098	JOSD2	conserved	other
1.85687	1.4265	ABR	monkey	other
1.69992	1.41813	NCOA2	monkey	other
3.07177	2.5141	ITPR2	monkey	other
-1.89818	1.98841	TSPAN3	mouse	other
1.14837	1.00595	STK3	conserved	other
-0.828579	0.834622	DTX3	conserved	other
0.679818	0.587984	PEAK1	conserved	other
1.82425	1.24674	DSCAM	monkey	other
-0.145003	1.10177	TM9SF3	conserved	other
0.468538	0.374001	TMEM231	conserved	other
0.510663	0.392541	CDYL	conserved	other
1.75825	1.28552	SNAP91	monkey	other
-0.517818	0.861265	LY6H	conserved	other
-0.761803	1.24342	METAP2	conserved	other
-1.57002	1.26484	GABARAPL2	mouse	other
0.0921766	0.438527	NOL4L	conserved	other
0.510173	0.600099	EIF2B5	conserved	other
0.532678	0.468846	MRPS31	conserved	other
-0.588407	0.323996	SMIM19	conserved	other
2.54214	1.91374	CAMK1D	monkey	other
2.83571	2.41786	ROBO2	monkey	other
-1.41582	0.985703	EMC10	conserved	other
2.50182	1.90191	VPS13B	monkey	other
0.894843	1.17651	SLC20A2	conserved	other
-0.235211	1.17433	CLCN3	conserved	other
0.107414	0.69929	COMMD7	conserved	other
0.0637099	0.661914	ATG5	conserved	other
0.437748	0.382991	GOSR1	conserved	other
-3.17722	2.3285	COX6C	mouse	other
-0.149347	0.461773	PARP1	conserved	other
-0.120668	0.404078	SREBF1	conserved	other
5.75942	5.39355	ADGRV1	monkey	other
0.802272	0.458772	RGS22	conserved	other
-0.992449	0.579933	TIMM10B	conserved	other
-0.675451	0.748052	SLC3A2	conserved	other
0.138671	0.855706	ACTR10	conserved	other
0.414003	0.393201	RHPN1	conserved	other
1.07834	0.886647	SNX13	conserved	other
0.627815	0.748233	HMG20A	conserved	other
0.914171	0.537449	SLIT1	conserved	other
-0.840705	0.871415	DCTN2	conserved	other
-0.275445	0.580426	TRAM1	conserved	other
-0.222556	0.43325	MALSU1	conserved	other
-1.66244	1.25185	NDUFB10	mouse	other
-3.20154	2.35041	NDUFA4	mouse	other
0.752044	0.487678	PREP	conserved	other
-1.02169	0.599457	IGF2BP3	conserved	other
-0.31732	0.288709	HSPA13	conserved	other
0.357355	0.848139	CPD	conserved	other
-0.197245	0.488148	CCDC174	conserved	other
0.701154	0.630528	CYB5R4	conserved	other
-0.258824	0.269346	RAP2C	conserved	other
-0.616407	0.57621	SOAT1	conserved	other
-1.07458	1.11154	VDAC3	conserved	other
-0.0181414	0.638287	ANKRD46	conserved	other
-0.322303	0.270514	RNASEH2A	conserved	other
0.441317	1.53482	TRA2A	conserved	other
0.431388	0.427816	MFSD8	conserved	other
-0.0998374	0.420616	SLC38A3	conserved	other
3.07191	2.49203	CNTN1	monkey	other
-0.285602	0.373452	DDIT3	conserved	other
0.810474	0.902054	VEZT	conserved	other
1.50144	1.99331	FARS2	monkey	other
-1.7115	1.32248	AP2M1	mouse	other
-1.04059	0.612149	CAMK2D	conserved	other
-0.131125	0.293683	WDR74	conserved	other
5.13621	4.53661	CTNNA2	monkey	other
-0.240681	0.649504	CDC123	conserved	other
-0.119815	0.588826	YTHDF2	conserved	other
0.409504	0.573901	DNAJC11	conserved	other
0.119014	0.519691	TERF2IP	conserved	other
4.4644	3.57167	PDZRN4	monkey	other
-0.196757	0.514826	NRN1	conserved	other
-0.466884	0.252247	POLB	conserved	other
-0.3053	0.465683	NUDT5	conserved	other
1.21197	1.21578	PSME4	conserved	other
1.18474	0.909692	CEP162	conserved	other
0.348967	0.43426	ACBD3	conserved	other
0.46535	0.616012	NRIP1	conserved	other
1.32529	1.04271	ABL2	conserved	other
1.98854	1.61334	FGD6	monkey	other
0.672382	0.954717	ARID4A	conserved	other
-0.116652	0.659987	FGFR1OP2	conserved	other
-1.5702	1.21345	CETN3	mouse	other
1.30539	1.32504	TRIP12	conserved	other
-0.0612907	0.499652	TAF12	conserved	other
-0.489948	0.689006	THAP3	conserved	other
-1.09655	0.80084	KLF6	conserved	other
-0.264076	0.272296	ZDHHC16	conserved	other
0.63947	1.37746	YAF2	conserved	other
1.34383	1.1468	USP25	conserved	other
-0.701592	0.394463	IMP3	conserved	other
0.664847	0.550003	HACE1	conserved	other
0.223617	0.401646	NELFA	conserved	other
-0.311271	0.429225	INO80E	conserved	other
0.65041	0.369553	NT5E	conserved	other
-1.72772	1.10837	YWHAZ	mouse	other
1.19642	1.03503	PTPN9	conserved	other
-0.346226	0.619598	BLMH	conserved	other
-0.524553	0.858329	TRNAU1AP	conserved	other
1.01236	0.942021	USP46	conserved	other
-0.697849	0.644388	BZW2	conserved	other
-0.416354	0.487527	BLVRB	conserved	other
0.536455	0.486328	SH3KBP1	conserved	other
-0.433872	0.278888	ORAI1	conserved	other
2.13825	1.64115	EFNA5	monkey	other
0.521535	0.486918	FBXO36	conserved	other
1.08722	0.970511	OSBPL9	conserved	other
0.0696934	0.551575	HAGH	conserved	other
3.4751	2.94353	ASB3	monkey	other
-0.202972	0.688166	SAE1	conserved	other
0.131387	0.456222	ANKMY2	conserved	other
-1.23472	1.03781	NXF1	conserved	other
-0.335466	0.494012	TM7SF3	conserved	other
-0.00886758	1.44892	MTCH2	conserved	other
0.917879	0.747485	UIMC1	conserved	other
0.54499	0.431109	NR2C1	conserved	other
0.599807	0.336734	NOX4	conserved	other
-0.416852	0.287188	FAHD1	conserved	other
0.309762	0.604657	GLMN	conserved	other
2.87177	2.20134	FBXL17	monkey	other
0.727523	0.903547	IKBKB	conserved	other
0.647454	0.847314	ERLEC1	conserved	other
0.709583	0.506509	PRICKLE1	conserved	other
-1.69836	1.54222	NDUFA12	mouse	other
-0.25764	0.346051	NUBP2	conserved	other
-0.149033	0.418312	TAF6L	conserved	other
0.0438036	0.655064	NCALD	conserved	other
0.486313	0.325325	C2CD2	conserved	other
0.617355	0.854163	UPF2	conserved	other
2.19123	1.6237	FER	monkey	other
0.464051	0.623415	TMCC3	conserved	other
-1.01764	0.717134	POLR2G	conserved	other
3.17333	2.52871	GRIK2	monkey	other
0.610741	0.76255	TRIP11	conserved	other
-0.935921	0.818987	MED21	conserved	other
1.6402	1.11031	SCFD2	monkey	other
0.107141	0.562896	BSCL2	conserved	other
0.131443	1.00347	PJA2	conserved	other
1.41851	1.5936	PHF14	conserved	other
1.70836	1.09861	SCN1A	monkey	other
0.283328	0.543603	GPC4	conserved	other
0.44066	0.786378	NSRP1	conserved	other
1.13332	0.969217	NEK1	conserved	other
-0.358384	0.292982	GPRASP2	conserved	other
-0.191536	0.890212	ILK	conserved	other
2.62693	1.92013	PDE4D	monkey	other
0.518484	0.656416	CEP83	conserved	other
1.41243	1.06979	SNX14	conserved	other
-1.19367	0.918237	UBXN1	conserved	other
0.411177	0.396925	MMS19	conserved	other
-0.600164	0.441117	EMD	conserved	other
1.27408	0.808879	MAN2A1	conserved	other
0.745035	0.445361	ECHDC3	conserved	other
1.34036	0.952489	ASCC3	conserved	other
-0.737449	0.599992	TWF1	conserved	other
-0.383208	0.20429	TAF10	conserved	other
0.334372	0.761431	NR2C2	conserved	other
-0.354358	0.258863	RNF6	conserved	other
1.29831	0.80096	TMEM117	conserved	other
0.0384436	0.466016	CPSF2	conserved	other
1.80766	1.4126	CRADD	monkey	other
2.3612	1.76218	NELL2	monkey	other
-0.243847	0.462794	EHMT2	conserved	other
0.306379	0.708303	DIDO1	conserved	other
0.81534	0.86643	EPB41L5	conserved	other
0.817271	1.55862	TLE1	conserved	other
0.626643	0.635501	STK38L	conserved	other
-1.61438	1.07322	SOCS2	mouse	other
1.59933	1.19238	VAT1L	monkey	other
1.69137	1.6622	CPEB4	monkey	other
0.818172	1.2621	DAAM1	conserved	other
-0.377532	0.544069	MRPS25	conserved	other
-0.891785	0.513729	DBX2	conserved	other
0.430038	0.571645	SIN3A	conserved	other
-0.646146	0.358949	PDHA1	conserved	other
-1.386	1.19648	MRPL42	conserved	other
1.88063	1.93079	UBR5	monkey	other
2.80268	2.3813	GRM5	monkey	other
-1.52337	1.52726	UBE2N	mouse	other
2.64473	2.11467	LRRC7	monkey	other
1.73933	1.40615	SSH2	monkey	other
-0.174851	0.806751	NUDT4	conserved	other
-1.82068	1.225	TCEAL8	mouse	other
1.66706	1.44781	ARHGAP35	monkey	other
2.12835	1.49661	THSD7A	monkey	other
0.610894	0.39269	RAB3C	conserved	other
-0.68425	0.382317	TMEM219	conserved	other
0.796037	0.578529	RREB1	conserved	other
-0.417492	0.252333	GID8	conserved	other
2.24467	1.9464	TOM1L2	monkey	other
2.07206	1.77986	SH3RF1	monkey	other
1.05026	1.04759	EEA1	conserved	other
1.47114	1.39048	PLD3	conserved	other
0.246739	0.38088	IFFO1	conserved	other
3.91638	3.27515	WWOX	monkey	other
4.26721	3.53117	NCAM2	monkey	other
0.853951	0.717013	ABHD18	conserved	other
0.0627003	0.420117	KCTD13	conserved	other
0.849017	0.726876	VPS39	conserved	other
3.06389	2.24919	LRRTM4	monkey	macaque_enriched
0.963087	1.01565	YAP1	conserved	other
1.19732	1.10034	KAT6A	conserved	other
1.12535	0.861063	CDK8	conserved	other
0.960544	0.568067	TMEM232	conserved	other
-0.107602	0.741448	TMEM106B	conserved	other
-0.332626	0.368964	TPP1	conserved	other
-0.33272	0.367268	SDE2	conserved	other
1.23439	0.942041	PRICKLE2	conserved	other
1.70374	1.61255	RPRD2	monkey	other
1.06793	0.888025	ANO6	conserved	other
-0.426394	0.835847	NSG2	conserved	other
1.29479	0.978828	RPAP2	conserved	other
0.805667	0.689067	LARP1B	conserved	other
1.46878	1.25834	MEF2A	conserved	other
0.749555	0.6909	PI4K2A	conserved	other
0.429486	0.657627	MRPL39	conserved	other
3.57024	2.86375	DGKB	monkey	other
-0.355847	1.14711	SSR1	conserved	other
0.220912	0.684783	JAM2	conserved	other
0.555569	0.84845	EYA1	conserved	other
0.900155	0.832533	PHACTR4	conserved	other
0.431183	0.398185	GCFC2	conserved	other
-0.563298	0.881838	AZIN1	conserved	other
0.651532	0.442539	CEP126	conserved	other
-0.0324153	0.640328	GANAB	conserved	other
-1.34028	1.08012	AP2S1	conserved	other
-1.6809	1.5554	VAPA	mouse	other
-0.237924	0.381262	MRPL19	conserved	other
-0.296116	0.339125	PGRMC2	conserved	other
0.318118	0.4071	PRPF3	conserved	other
1.1624	1.2845	ARID2	conserved	other
1.70977	1.7863	NSD1	monkey	other
-0.152455	0.441414	PHF6	conserved	other
-0.636338	0.352973	RAB31	conserved	other
0.577034	1.30567	ATP2B1	conserved	other
0.466315	1.11216	SCAF11	conserved	other
-1.61502	1.03298	NKAIN4	mouse	other
-1.83324	1.1901	MRPS21	mouse	other
-0.13509	0.416935	LGMN	conserved	other
0.699896	0.391981	RPE65	conserved	other
-1.04644	0.917554	RAB24	conserved	other
1.33644	1.01976	ARHGAP42	conserved	other
-1.37235	0.954244	MRPL17	conserved	other
1.26795	1.1939	WASF3	conserved	other
-1.12294	1.05104	SLC38A1	conserved	other
1.07152	0.893252	POC1B	conserved	other
0.327323	0.434364	GOLGA5	conserved	other
-0.261293	0.460568	P3H4	conserved	other
-0.489043	0.479284	SLC38A2	conserved	other
0.446841	0.400275	SYP	conserved	other
2.16982	1.8915	DCLK2	monkey	other
1.27708	1.17451	PALLD	conserved	other
2.00323	1.33385	CNTN5	monkey	macaque_enriched
-0.0630082	0.718584	RNF4	conserved	other
1.37853	1.13732	ITPK1	conserved	other
-0.596728	0.579392	PSMD2	conserved	other
1.90925	1.49569	TMEM135	monkey	other
1.47913	1.39959	PTPN4	conserved	other
0.761852	1.5742	RBM5	conserved	other
-0.0142986	0.501874	UBR7	conserved	other
0.863857	0.702429	ADAM22	conserved	other
-0.217266	0.297667	RPAP3	conserved	other
0.864752	0.501807	ENDOU	conserved	other
0.419111	0.331825	R3HCC1L	conserved	other
-0.53274	0.290822	LMAN2	conserved	other
-0.570591	0.366563	MTA2	conserved	other
-0.278237	0.31074	FKBP10	conserved	other
1.2758	0.971466	LRRC28	conserved	other
-1.20759	0.808636	POLE4	conserved	other
2.2007	1.54216	RIMS2	monkey	other
1.50595	2.09612	APP	monkey	other
-0.0745679	0.364481	TSC1	conserved	other
-0.152408	0.302813	GID4	conserved	other
0.537797	0.416763	AHNAK	conserved	other
-0.317179	0.353891	NR1H2	conserved	other
1.30379	0.909854	BTBD7	conserved	other
-0.904641	1.26721	ASRGL1	conserved	other
-0.482829	0.401181	APH1A	conserved	other
0.523237	1.31583	EPS15	conserved	other
0.801732	0.455856	CFAP221	conserved	other
1.27552	1.01242	WLS	conserved	other
0.50145	0.60657	ETV1	conserved	other
-0.571224	0.376748	TCEAL1	conserved	other
1.19201	1.19864	MPP6	conserved	other
0.443432	0.356506	LRP12	conserved	other
1.10261	0.864178	TERF1	conserved	other
-0.398422	0.212921	TWSG1	conserved	other
-2.01442	1.33347	MORF4L2	mouse	other
2.96324	2.29387	ZFPM2	monkey	other
0.523712	0.558245	EXOC7	conserved	other
-0.160825	0.331676	SNRNP48	conserved	other
0.887584	0.567431	RAPGEF3	conserved	other
0.843811	1.08777	CMIP	conserved	other
0.413842	0.451903	MBD2	conserved	other
-0.963728	0.560883	ANKRD12	conserved	other
3.81717	2.94947	DCC	monkey	other
2.16634	1.58634	KDM4C	monkey	other
0.82438	1.02971	PLP1	conserved	other
-0.502487	0.3172	ADAMTS1	conserved	other
-0.196978	0.37057	MEX3C	conserved	other
0.466665	0.810289	SMAD4	conserved	other
-0.0621753	0.463415	GLT8D1	conserved	other
0.719134	0.776595	NVL	conserved	other
2.20774	3.23279	ANK2	monkey	other
-0.384421	0.329518	N6AMT1	conserved	other
0.472172	0.459376	ME2	conserved	other
-0.452337	0.540647	TAZ	conserved	other
0.627952	0.547747	LTN1	conserved	other
-0.516165	0.580508	CNIH4	conserved	other
0.539249	0.406301	ME3	conserved	other
0.818154	0.466313	AK8	conserved	other
-0.571672	0.52964	MRO	conserved	other
1.10396	1.01976	GLS	conserved	other
-0.369828	0.494546	NT5C3B	conserved	other
-0.443681	0.307394	ORC6	conserved	other
0.638186	0.506359	SCN3B	conserved	other
-0.0287757	0.362592	USP16	conserved	other
-0.176106	0.329713	CXXC1	conserved	other
0.228242	0.539192	MAP3K1	conserved	other
1.64005	1.09726	SPOCK3	monkey	other
3.4297	3.19685	MAML2	monkey	other
-0.795154	0.779334	CCT8	conserved	other
-0.383682	0.428412	STRN4	conserved	other
1.28802	1.17688	MNAT1	conserved	other
-0.516447	0.616431	COMMD4	conserved	other
0.693755	0.641461	CDH13	conserved	other
0.507662	0.370923	DDX31	conserved	other
-0.616456	0.678915	SLC48A1	conserved	other
1.91722	1.92961	OXR1	monkey	other
0.655042	0.56955	SLC25A28	conserved	other
-0.665321	0.370679	RBM6	conserved	other
-2.4094	1.65822	HSBP1	mouse	other
0.53257	0.3475	FADS3	conserved	other
-1.58814	1.37942	DDAH2	mouse	other
-0.474118	0.26808	CDKN2C	conserved	other
2.18329	1.74049	FAF1	monkey	other
1.06441	0.640518	GRIK1	conserved	other
0.721971	0.474075	PPFIBP1	conserved	other
1.27069	0.994517	SCLT1	conserved	other
0.659915	0.864126	SH3PXD2B	conserved	other
0.212154	0.431609	NAB1	conserved	other
-1.24263	0.75116	DMRTA2	conserved	other
1.68202	1.14009	UNC79	monkey	other
0.975143	0.627548	EYA3	conserved	other
1.64699	1.51442	PELI2	monkey	other
-0.317225	0.403125	CDIPT	conserved	other
-0.0777762	0.489492	ABHD16A	conserved	other
0.589726	0.389389	UBTD2	conserved	other
2.12734	1.7577	FADS2	monkey	other
0.53034	0.312936	STK10	conserved	other
1.2669	0.946306	SYNPR	conserved	other
0.421476	0.434677	FAM199X	conserved	other
0.249787	0.513739	MTMR2	conserved	other
0.672317	0.620251	TTC23	conserved	other
1.31882	0.95966	RNF157	conserved	other
-1.24681	0.922985	ANP32E	conserved	other
-0.183828	0.438526	ATP6AP1	conserved	other
-0.113019	0.819016	WDR26	conserved	other
-0.292673	0.407183	GNL3	conserved	other
1.03472	3.92436	CPE	conserved	other
0.535826	1.46498	FADS1	conserved	other
0.671992	0.664987	TTF1	conserved	other
-0.612587	0.480489	ACAA2	conserved	other
0.979884	0.777241	STK39	conserved	other
1.02795	1.09966	GPT2	conserved	other
0.137805	0.650499	PLEKHO1	conserved	other
0.778264	0.840849	WDR37	conserved	other
-1.10351	0.654786	SYNCRIP	conserved	other
-0.528735	1.21475	MSMO1	conserved	other
1.58345	1.24529	DYM	monkey	other
-1.66646	1.08413	TMEM258	mouse	other
-1.00399	0.587626	DNAJA2	conserved	other
-0.904289	0.719138	UBALD2	conserved	other
-0.285345	0.399972	INSIG2	conserved	other
0.788352	1.43866	TAOK1	conserved	other
0.510944	0.277974	ABCC2	conserved	other
0.519726	0.283141	IL1RAPL2	conserved	other
-1.17917	0.706849	CSNK2B	conserved	other
1.05604	0.862848	SETX	conserved	other
-0.342621	0.865738	GDI1	conserved	other
0.436445	0.559671	NAA60	conserved	other
1.39783	1.04341	KLHL2	conserved	other
1.40016	0.996348	CTIF	conserved	other
0.471179	0.333742	SYNM	conserved	other
-0.442817	0.382438	RPA2	conserved	other
-0.205034	0.632154	ACLY	conserved	other
-0.308377	0.287088	FAM50A	conserved	other
0.786309	0.834717	NETO2	conserved	other
-0.0370135	0.502728	CNIH3	conserved	other
0.634641	0.643533	VPS45	conserved	other
0.663178	0.619147	SMAD2	conserved	other
-0.172861	0.353563	ARFGAP1	conserved	other
-0.019293	0.371213	ELAVL4	conserved	other
1.59426	1.84245	ITFG1	monkey	other
0.651392	0.663822	OTUD7B	conserved	other
1.02685	1.02621	HIBCH	conserved	other
2.3571	1.7153	PTPRM	monkey	other
1.1253	1.17361	FAM193A	conserved	other
0.526681	0.663189	MBTPS1	conserved	other
0.610542	0.498277	TMEM260	conserved	other
2.33495	1.76882	ANGPT1	monkey	other
0.471876	0.376142	CCDC93	conserved	other
0.462577	0.508458	NUFIP2	conserved	other
-1.52086	1.5743	EIF3E	mouse	other
0.195002	0.461216	TMEM192	conserved	other
-1.24337	0.751683	HDHD2	conserved	other
0.487106	1.0244	HIF1A	conserved	other
-0.0787988	0.802007	EMC2	conserved	other
-0.264753	0.549357	BCL7A	conserved	other
1.39103	1.27353	FBXW11	conserved	other
-0.63195	0.931377	IDI1	conserved	other
0.648615	1.33272	IGF1R	conserved	other
-0.79953	0.454457	NEUROG2	conserved	other
1.57632	1.50598	PHKB	monkey	other
-1.64816	1.04766	ENY2	mouse	other
-1.0555	0.622198	STX12	conserved	other
0.55424	0.303573	DNASE1	conserved	other
1.11237	1.08006	MEF2C	conserved	other
0.677004	0.377855	MST1R	conserved	other
-0.182335	0.715531	AKT2	conserved	other
-0.566265	0.476263	CNP	conserved	other
0.347636	1.28457	DDX24	conserved	other
0.0108835	0.707833	DDX18	conserved	other
-0.105789	0.609135	CHUK	conserved	other
-0.602367	0.682107	EIF4G1	conserved	other
1.68039	1.32442	SCAF8	monkey	other
-0.00870613	0.68098	PRPSAP1	conserved	other
-2.2427	1.71824	CD9	mouse	other
1.17202	0.898276	CCDC91	conserved	other
0.74009	1.00511	PIAS2	conserved	other
1.04062	0.615744	KCNH5	conserved	other
-0.533168	0.392386	UBL4A	conserved	other
3.19271	2.39684	DOCK4	monkey	other
0.261566	0.617846	EXOC5	conserved	other
0.43957	0.528718	SLC9A6	conserved	other
0.411925	0.613808	XPO7	conserved	other
-0.693231	0.461351	SF3B4	conserved	other
0.460552	0.368068	CERS6	conserved	other
0.101004	1.65126	EVI5	conserved	other
2.7865	1.98177	L3MBTL4	monkey	other
-0.613466	1.22942	COTL1	conserved	other
-0.0743294	0.357306	FAM3A	conserved	other
0.587549	0.412193	TIAM2	conserved	other
-2.16828	1.45809	COX5A	mouse	other
-1.07167	0.734422	PSMC3	conserved	other
1.69556	2.00642	MAGI1	monkey	other
-0.487419	0.327894	TTC9B	conserved	other
1.70271	1.39452	GRAMD1B	monkey	other
-1.11312	0.661353	BOLA1	conserved	other
-0.279826	0.301352	RNF165	conserved	other
1.60327	1.10211	IMMP2L	monkey	macaque_enriched
-1.97701	1.95407	CALM3	mouse	other
-0.448511	0.241615	USP10	conserved	other
0.576717	0.567375	UBE2O	conserved	other
0.716135	0.505947	EPG5	conserved	other
0.047348	0.429257	EED	conserved	other
-0.47106	0.254671	AP1AR	conserved	other
0.00988209	0.686346	SLC14A1	conserved	other
-0.0123178	0.93521	PCDH10	conserved	other
0.738348	0.482531	PMS1	conserved	other
1.314	1.03759	MED27	conserved	other
0.523933	0.365911	MLXIP	conserved	other
-0.371964	0.668894	TMEM106C	conserved	other
0.0487838	0.656129	FHL1	conserved	other
0.546431	1.0111	CAB39	conserved	other
1.07805	1.2834	PPP2R5E	conserved	other
-0.38144	0.425657	BAG6	conserved	other
-0.772746	1.4289	ITM2C	conserved	other
0.986664	0.788301	SPATA6	conserved	other
-0.638811	0.354477	DNAJB9	conserved	other
-1.13045	0.779636	WDR89	conserved	other
0.507591	0.307179	SH3BP2	conserved	other
-0.162055	0.669033	PNPLA8	conserved	other
-0.175159	0.513665	FAM76A	conserved	other
-0.63134	0.353036	WNT8B	conserved	other
0.276565	0.556463	CPSF7	conserved	other
5.93496	4.97509	DPP10	monkey	other
0.764151	1.03485	FNDC3A	conserved	other
-0.393774	0.288687	PARD6G	conserved	other
0.201934	0.542475	CEP57	conserved	other
-0.432734	0.232531	RBFA	conserved	other
1.88948	1.73591	KCNIP1	monkey	other
0.68375	0.423311	PPP4R4	conserved	other
0.510298	0.283997	SEC31B	conserved	other
-0.913617	0.862088	TXNL4A	conserved	other
-0.41699	0.223508	WDR45	conserved	other
0.432466	0.307659	SLC25A40	conserved	other
-0.293593	0.446397	GTPBP4	conserved	other
-0.296214	0.25213	NKIRAS2	conserved	other
-0.916195	0.55871	CAV2	conserved	other
0.199119	0.678669	PPP5C	conserved	other
-0.318638	0.293959	TMEM216	conserved	other
0.530194	0.32555	RUNDC3B	conserved	other
0.0486337	0.402517	EBAG9	conserved	other
1.12217	1.28412	SYBU	conserved	other
0.396046	0.33601	PPFIBP2	conserved	other
1.2008	1.3515	SLC7A11	conserved	other
0.907659	0.663008	SLC25A26	conserved	other
-0.385255	0.294546	TMEM138	conserved	other
-0.310388	0.388273	TTC5	conserved	other
0.209627	0.48142	AHDC1	conserved	other
-0.941758	0.55939	CAV1	conserved	other
3.00202	2.61548	ARID1B	monkey	other
2.71076	2.30509	LRIG1	monkey	other
-0.478461	0.258975	STAU2	conserved	other
0.810802	0.92991	ARHGAP12	conserved	other
-0.0077094	0.358024	FAM76B	conserved	other
0.491847	0.291168	TEP1	conserved	other
0.951462	0.756097	TXNIP	conserved	other
-0.333666	0.708033	PRRC2A	conserved	other
-0.408228	0.519749	NR2F2	conserved	other
0.222889	0.782929	ELOVL6	conserved	other
1.17324	1.0633	CCDC6	conserved	other
3.41355	2.98045	NRCAM	monkey	other
1.23396	0.903899	ARHGEF11	conserved	other
-1.07944	0.638407	TMEM242	conserved	other
1.21915	0.763795	ZDHHC14	conserved	other
1.13363	0.717306	HIF3A	conserved	other
-0.589611	0.572593	OSGEP	conserved	other
1.62176	1.48131	R3HDM2	monkey	other
1.39072	0.945332	SNX9	conserved	other
0.0998789	0.657677	WASF2	conserved	other
-1.02457	0.765308	APEX1	conserved	other
-1.01279	0.593499	DIABLO	conserved	other
-0.973365	0.697764	PSMC4	conserved	other
-1.06684	0.629865	MRPL43	conserved	other
0.29566	0.417216	TRAP1	conserved	other
0.0103686	0.805744	DDB1	conserved	other
-0.0225123	0.416367	LIX1L	conserved	other
-0.977299	1.19591	DDX39B	conserved	other
-0.65296	1.36587	CAPZA2	conserved	other
-0.419026	0.224673	PEX11B	conserved	other
-0.608149	0.335885	PRAF2	conserved	other
-0.875131	0.502929	PRR7	conserved	other
-0.123706	0.466702	LZTS2	conserved	other
-0.447003	0.240745	GINS2	conserved	other
-0.0271869	0.652268	ALKBH5	conserved	other
-0.260075	1.03208	SESN3	conserved	other
-0.423874	0.227448	STXBP6	conserved	other
0.452491	1.15245	PSMD1	conserved	other
-0.135234	0.409997	CROT	conserved	other
1.70058	1.49015	NOVA1	monkey	other
-0.92632	0.766374	EMC8	conserved	other
-0.539437	0.294786	SUCLG2	conserved	other
0.0819066	0.838624	CCNH	conserved	other
-1.02931	0.726657	TMEM243	conserved	other
-1.42566	0.934844	FOXG1	conserved	other
1.88513	1.42585	ATP9B	monkey	other
0.33844	0.711437	MTF2	conserved	other
2.6066	2.12139	PRKD1	monkey	other
0.917089	1.06904	MAPK8IP3	conserved	other
-0.391856	0.264785	SAYSD1	conserved	other
-0.654468	2.38172	HNRNPA2B1	conserved	other
-0.288079	0.540816	RCBTB2	conserved	other
-0.357557	1.09137	ACTR3	conserved	other
-0.450728	0.485438	TMED3	conserved	other
3.25061	2.43206	CSMD3	monkey	other
-1.26962	0.823721	DCTPP1	conserved	other
-1.36446	1.03995	CWC15	conserved	other
0.299512	0.354654	CLCN2	conserved	other
-0.301098	0.423699	AMOTL1	conserved	other
-0.703417	0.46967	GAR1	conserved	other
0.817323	0.748924	SLC38A9	conserved	other
-0.54103	0.58055	TMEM222	conserved	other
[truncated: 3,418 more rows]
